# Supplementary material for: Berberine Inhibits MDA-MB-231 Cells as an Agonist of G Protein-Coupled Estrogen Receptor 1
Source: MDPI journal article supplement (doi:10.3390/ijms222111466), 2021-10-24
Supplement: s1 [file s1]

---

**Table S1. Primer sequences for RT-PCR.**

|                | Primer Sequences (5'–3')                           |
|----------------|----------------------------------------------------|
| <i>GAPDH</i>   | F: TGTTGCCATCAATGACCCCTT<br>R: CTCCACGACGTACTCAGCG |
| <i>SQSTM1</i>  | F: GCCAGAGGAACAGATGGAGT<br>R: TCCGATTCTGGCATCTGTAG |
| <i>MAP1LC3</i> | F: AGCAGCATCCAACCAAATC<br>R: CTGTGTCCGTTACCAACAG   |
| <i>GPB1</i>    | F: CTCCAACAGCTGCCTAAACC<br>R: TCTACACGGCACTGCTGAAC |
| <i>RELA</i>    | F: AGAAAGAGGACATTGAGGTG<br>R: TCGTCTGTATCTGGCAGGTA |

---
