# Supplementary material for: Berberine Inhibits MDA-MB-231 Cells as an Agonist of G Protein-Coupled Estrogen Receptor 1
Source: MDPI journal article supplement (doi:10.3390/ijms222111466), 2021-10-24
Supplement: s1 [file s1]

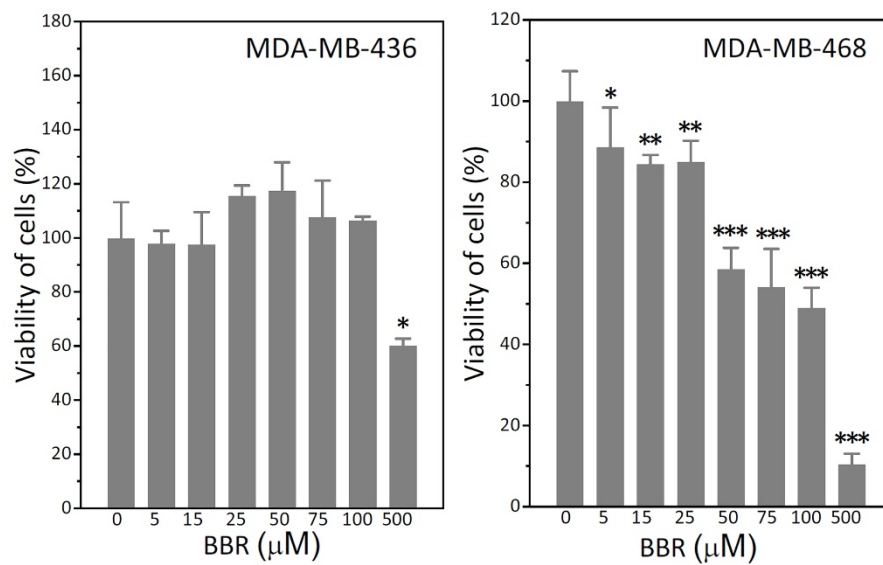

**Figure S1.** The effect of BBR on the viability of both MDA-MB-436 and MDA-MB-468 cells. The cells were treated with 0.1% DMSO as a vehicle control. The data are presented as mean  $\pm$  SEM;  $n = 5$ .  $p < 0.05$  (\*),  $p < 0.01$  (\*\*),  $p < 0.001$  (\*\*\*).

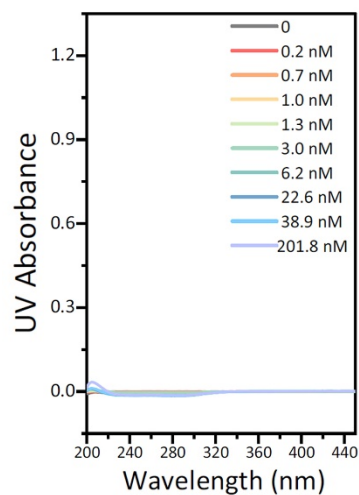

**Figure S2.** Ultraviolet absorption of BBR.

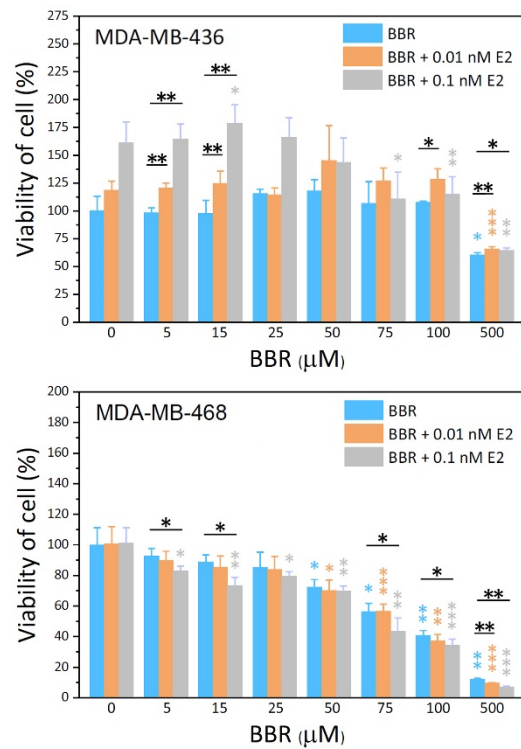

**Figure S3.** The effect of BBR on the viability of both MDA-MB-436 and MDA-MB-468 cells with the changes of estrogen levels.
