# Supplementary material for: Berberine Inhibits MDA-MB-231 Cells as an Agonist of G Protein-Coupled Estrogen Receptor 1
Source: Int J Mol Sci. 2021 Oct 24;22(21):11466. doi: 10.3390/ijms222111466 (PMC8583996; doi:10.3390/ijms222111466)
Supplement: Supplementary file 1 [file ijms-22-11466-s001.zip › Table S2-S4.xlsx]

## Sheet: Table S2
Gene	Accession	Description	Unique peptides	MEAN BBR	MEAN Ctrl	sign	level	FOLD CHANGE	LOG_FOLDCHANGE
AAAS	Q9NRG9	sp|Q9NRG9|AAAS_HUMAN Aladin OS=Homo sapiens OX=9606 GN=AAAS PE=1 SV=1	10	1.83979e-05	1.88217e-05	0.435479	1	0.977484	-0.0328557
AAK1	Q2M2I8	sp|Q2M2I8|AAK1_HUMAN AP2-associated protein kinase 1 OS=Homo sapiens OX=9606 GN=AAK1 PE=1 SV=3	2	1.84973e-06	3.74588e-06	0.109969	1	0.493804	-1.01799
AAMP	Q13685	sp|Q13685|AAMP_HUMAN Angio-associated migratory cell protein OS=Homo sapiens OX=9606 GN=AAMP PE=1 SV=2	3	1.02431e-05	6.15394e-08	8.43641e-09	4	166.448	7.37893
AAR2	Q9Y312	sp|Q9Y312|AAR2_HUMAN Protein AAR2 homolog OS=Homo sapiens OX=9606 GN=AAR2 PE=1 SV=2	6	1.21326e-05	1.93752e-05	0.19586	1	0.626193	-0.67532
AARS	P49588	sp|P49588|SYAC_HUMAN Alanine--tRNA ligase, cytoplasmic OS=Homo sapiens OX=9606 GN=AARS PE=1 SV=2	11	1.20332e-05	1.17728e-05	0.463013	1	1.02212	0.0315669
AARS2	Q5JTZ9	sp|Q5JTZ9|SYAM_HUMAN Alanine--tRNA ligase, mitochondrial OS=Homo sapiens OX=9606 GN=AARS2 PE=1 SV=1	2	3.31659e-08	6.15394e-08	0.137773	1	0.538937	-0.891812
AASDHPPT	Q9NRN7	sp|Q9NRN7|ADPPT_HUMAN L-aminoadipate-semialdehyde dehydrogenase-phosphopantetheinyl transferase OS=Homo sapiens OX=9606 GN=AASDHPPT PE=1 SV=2	7	2.38675e-05	1.59984e-05	0.360521	1	1.49187	0.577119
AASS	Q9UDR5	sp|Q9UDR5|AASS_HUMAN Alpha-aminoadipic semialdehyde synthase, mitochondrial OS=Homo sapiens OX=9606 GN=AASS PE=1 SV=1	12	8.94037e-06	1.23817e-05	0.262883	1	0.722063	-0.469803
AATF	Q9NY61	sp|Q9NY61|AATF_HUMAN Protein AATF OS=Homo sapiens OX=9606 GN=AATF PE=1 SV=1	5	1.31271e-05	1.27508e-05	0.467479	1	1.02952	0.0419685
ABCA13	Q86UQ4	sp|Q86UQ4|ABCAD_HUMAN ATP-binding cassette sub-family A member 13 OS=Homo sapiens OX=9606 GN=ABCA13 PE=2 SV=3	2	1.41216e-06	6.15394e-08	0.000312582	4	22.9472	4.52025
ABCB10	Q9NRK6	sp|Q9NRK6|ABCBA_HUMAN ATP-binding cassette sub-family B member 10, mitochondrial OS=Homo sapiens OX=9606 GN=ABCB10 PE=1 SV=2	3	3.31659e-08	1.46145e-06	8.34531e-10	4	0.0226939	-5.46155
ABCB7	O75027	sp|O75027|ABCB7_HUMAN ATP-binding cassette sub-family B member 7, mitochondrial OS=Homo sapiens OX=9606 GN=ABCB7 PE=1 SV=2	4	8.03539e-06	5.2959e-06	0.353458	1	1.51729	0.601493
ABCC1	P33527	sp|P33527|MRP1_HUMAN Multidrug resistance-associated protein 1 OS=Homo sapiens OX=9606 GN=ABCC1 PE=1 SV=3	12	7.61771e-06	1.15329e-05	0.219666	1	0.660521	-0.598324
ABCC3	O15438	sp|O15438|MRP3_HUMAN Canalicular multispecific organic anion transporter 2 OS=Homo sapiens OX=9606 GN=ABCC3 PE=1 SV=3	2	3.31659e-08	1.25109e-06	3.6278e-09	4	0.0265097	-5.23734
ABCC4	O15439	sp|O15439|MRP4_HUMAN Multidrug resistance-associated protein 4 OS=Homo sapiens OX=9606 GN=ABCC4 PE=1 SV=3	5	4.69394e-07	1.99288e-06	0.00864556	3	0.235535	-2.08598
ABCD3	P28288	sp|P28288|ABCD3_HUMAN ATP-binding cassette sub-family D member 3 OS=Homo sapiens OX=9606 GN=ABCD3 PE=1 SV=1	21	0.000102431	0.00012068	0.351055	1	0.848784	-0.23653
ABCE1	P61221	sp|P61221|ABCE1_HUMAN ATP-binding cassette sub-family E member 1 OS=Homo sapiens OX=9606 GN=ABCE1 PE=1 SV=1	21	0.000149172	0.000152419	0.436242	1	0.978699	-0.031063
ABCF1	Q8NE71	sp|Q8NE71|ABCF1_HUMAN ATP-binding cassette sub-family F member 1 OS=Homo sapiens OX=9606 GN=ABCF1 PE=1 SV=2	19	9.89507e-05	8.94952e-05	0.491512	1	1.10565	0.1449
ABCF2	Q9UG63	sp|Q9UG63|ABCF2_HUMAN ATP-binding cassette sub-family F member 2 OS=Homo sapiens OX=9606 GN=ABCF2 PE=1 SV=2	23	9.87518e-05	0.000102412	0.427136	1	0.96426	-0.0525059
ABCF3	Q9NUQ8	sp|Q9NUQ8|ABCF3_HUMAN ATP-binding cassette sub-family F member 3 OS=Homo sapiens OX=9606 GN=ABCF3 PE=1 SV=2	9	1.50166e-05	1.67734e-05	0.382324	1	0.895264	-0.159615
ABHD10	Q9NUJ1	sp|Q9NUJ1|ABHDA_HUMAN Mycophenolic acid acyl-glucuronide esterase, mitochondrial OS=Homo sapiens OX=9606 GN=ABHD10 PE=1 SV=1	9	4.35582e-05	8.21141e-05	0.132405	1	0.530459	-0.914686
ABHD11	Q8NFV4	sp|Q8NFV4|ABHDB_HUMAN Protein ABHD11 OS=Homo sapiens OX=9606 GN=ABHD11 PE=1 SV=1	2	4.60444e-06	6.15394e-08	1.04175e-06	4	74.8209	6.22537
ABHD12	Q8N2K0	sp|Q8N2K0|ABD12_HUMAN Lysophosphatidylserine lipase ABHD12 OS=Homo sapiens OX=9606 GN=ABHD12 PE=1 SV=2	12	3.55029e-05	5.16673e-05	0.238314	1	0.687145	-0.541315
ABHD14B	Q96IU4	sp|Q96IU4|ABHEB_HUMAN Protein ABHD14B OS=Homo sapiens OX=9606 GN=ABHD14B PE=1 SV=1	3	1.27293e-05	9.65071e-06	0.413311	1	1.319	0.399449
ABHD16A	O95870	sp|O95870|ABHGA_HUMAN Phosphatidylserine lipase ABHD16A OS=Homo sapiens OX=9606 GN=ABHD16A PE=1 SV=3	3	3.31659e-08	6.05246e-06	8.47553e-17	4	0.00547974	-7.51168
ABI1	Q8IZP0	sp|Q8IZP0|ABI1_HUMAN Abl interactor 1 OS=Homo sapiens OX=9606 GN=ABI1 PE=1 SV=4	5	4.84311e-05	2.26967e-05	0.224165	1	2.13384	1.09345
ABI2	Q9NYB9	sp|Q9NYB9|ABI2_HUMAN Abl interactor 2 OS=Homo sapiens OX=9606 GN=ABI2 PE=1 SV=1	3	6.62323e-06	3.93041e-06	0.310796	1	1.68513	0.752857
ABR	Q12979	sp|Q12979|ABR_HUMAN Active breakpoint cluster region-related protein OS=Homo sapiens OX=9606 GN=ABR PE=1 SV=2	7	5.33041e-06	5.83102e-06	0.394792	1	0.914146	-0.129503
ABRACL	Q9P1F3	sp|Q9P1F3|ABRAL_HUMAN Costars family protein ABRACL OS=Homo sapiens OX=9606 GN=ABRACL PE=1 SV=1	1	6.35472e-05	5.66495e-05	0.485048	1	1.12176	0.165765
ABT1	Q9ULW3	sp|Q9ULW3|ABT1_HUMAN Activator of basal transcription 1 OS=Homo sapiens OX=9606 GN=ABT1 PE=1 SV=1	2	2.45636e-06	4.66851e-06	0.129705	1	0.526156	-0.926438
ACAA1	P09110	sp|P09110|THIK_HUMAN 3-ketoacyl-CoA thiolase, peroxisomal OS=Homo sapiens OX=9606 GN=ACAA1 PE=1 SV=2	6	3.04311e-05	1.76776e-05	0.302404	1	1.72145	0.783622
ACAA2	P42765	sp|P42765|THIM_HUMAN 3-ketoacyl-CoA thiolase, mitochondrial OS=Homo sapiens OX=9606 GN=ACAA2 PE=1 SV=2	16	9.70612e-05	0.00014799	0.216417	1	0.655863	-0.608533
ACACA	Q13085	sp|Q13085|ACACA_HUMAN Acetyl-CoA carboxylase 1 OS=Homo sapiens OX=9606 GN=ACACA PE=1 SV=2	16	4.20665e-06	5.49888e-06	0.293065	1	0.765001	-0.386466
ACAD8	Q9UKU7	sp|Q9UKU7|ACAD8_HUMAN Isobutyryl-CoA dehydrogenase, mitochondrial OS=Homo sapiens OX=9606 GN=ACAD8 PE=1 SV=1	4	1.3326e-06	1.69579e-06	0.307627	1	0.785827	-0.347716
ACAD9	Q9H845	sp|Q9H845|ACAD9_HUMAN Acyl-CoA dehydrogenase family member 9, mitochondrial OS=Homo sapiens OX=9606 GN=ACAD9 PE=1 SV=1	17	4.35582e-05	3.93041e-05	0.490469	1	1.10824	0.148266
ACADM	P11310	sp|P11310|ACADM_HUMAN Medium-chain specific acyl-CoA dehydrogenase, mitochondrial OS=Homo sapiens OX=9606 GN=ACADM PE=1 SV=1	8	2.70498e-05	2.39884e-05	0.482719	1	1.12762	0.173283
ACADS	P16219	sp|P16219|ACADS_HUMAN Short-chain specific acyl-CoA dehydrogenase, mitochondrial OS=Homo sapiens OX=9606 GN=ACADS PE=1 SV=1	4	8.13484e-06	3.65362e-06	0.210164	1	2.22652	1.15479
ACADSB	P45954	sp|P45954|ACDSB_HUMAN Short/branched chain specific acyl-CoA dehydrogenase, mitochondrial OS=Homo sapiens OX=9606 GN=ACADSB PE=1 SV=1	6	1.03426e-05	9.74298e-06	0.486492	1	1.06154	0.0861619
ACADVL	P49748	sp|P49748|ACADV_HUMAN Very long-chain specific acyl-CoA dehydrogenase, mitochondrial OS=Homo sapiens OX=9606 GN=ACADVL PE=1 SV=1	33	0.000363979	0.000485304	0.282541	1	0.750003	-0.415031
ACAT1	P24752	sp|P24752|THIL_HUMAN Acetyl-CoA acetyltransferase, mitochondrial OS=Homo sapiens OX=9606 GN=ACAT1 PE=1 SV=1	19	0.000481328	0.000488994	0.439761	1	0.984322	-0.0227971
ACAT2	Q9BWD1	sp|Q9BWD1|THIC_HUMAN Acetyl-CoA acetyltransferase, cytosolic OS=Homo sapiens OX=9606 GN=ACAT2 PE=1 SV=2	6	8.08512e-05	1.93752e-05	0.0655313	1	4.17291	2.06105
ACBD3	Q9H3P7	sp|Q9H3P7|GCP60_HUMAN Golgi resident protein GCP60 OS=Homo sapiens OX=9606 GN=ACBD3 PE=1 SV=4	8	3.86852e-05	1.99288e-05	0.257156	1	1.94117	0.956927
ACBD5	Q5T8D3	sp|Q5T8D3|ACBD5_HUMAN Acyl-CoA-binding domain-containing protein 5 OS=Homo sapiens OX=9606 GN=ACBD5 PE=1 SV=1	6	6.84202e-06	1.66627e-05	0.0649868	1	0.410619	-1.28413
ACIN1	Q9UKV3	sp|Q9UKV3|ACINU_HUMAN Apoptotic chromatin condensation inducer in the nucleus OS=Homo sapiens OX=9606 GN=ACIN1 PE=1 SV=2	20	3.27184e-05	3.1554e-05	0.47191	1	1.0369	0.0522794
ACLY	P53396	sp|P53396|ACLY_HUMAN ATP-citrate synthase OS=Homo sapiens OX=9606 GN=ACLY PE=1 SV=3	46	0.000255581	0.000226967	0.483334	1	1.12607	0.171298
ACO1	P21399	sp|P21399|ACOC_HUMAN Cytoplasmic aconitate hydratase OS=Homo sapiens OX=9606 GN=ACO1 PE=1 SV=3	18	7.41881e-05	3.13694e-05	0.191202	1	2.36498	1.24183
ACO2	Q99798	sp|Q99798|ACON_HUMAN Aconitate hydratase, mitochondrial OS=Homo sapiens OX=9606 GN=ACO2 PE=1 SV=2	29	8.96026e-05	0.000116067	0.29796	1	0.771991	-0.373345
ACOT1	Q86TX2	sp|Q86TX2|ACOT1_HUMAN Acyl-coenzyme A thioesterase 1 OS=Homo sapiens OX=9606 GN=ACOT1 PE=1 SV=1;sp|P49753|ACOT2_HUMAN Acyl-coenzyme A thioesterase 2, mitochondrial OS=Homo sapiens OX=9606 GN=ACOT2 PE=1 SV=6	3	2.46631e-06	5.49888e-06	0.0843128	1	0.448511	-1.15678
ACOT13	Q9NPJ3	sp|Q9NPJ3|ACO13_HUMAN Acyl-coenzyme A thioesterase 13 OS=Homo sapiens OX=9606 GN=ACOT13 PE=1 SV=1	1	3.28178e-05	3.48754e-05	0.412264	1	0.941001	-0.087732
ACOT7	O00154	sp|O00154|BACH_HUMAN Cytosolic acyl coenzyme A thioester hydrolase OS=Homo sapiens OX=9606 GN=ACOT7 PE=1 SV=3	10	0.000138233	0.000126954	0.498363	1	1.08884	0.122793
ACOT8	O14734	sp|O14734|ACOT8_HUMAN Acyl-coenzyme A thioesterase 8 OS=Homo sapiens OX=9606 GN=ACOT8 PE=1 SV=1	1	5.46964e-06	6.15394e-08	3.94343e-07	4	88.8801	6.47379
ACOT9	Q9Y305	sp|Q9Y305|ACOT9_HUMAN Acyl-coenzyme A thioesterase 9, mitochondrial OS=Homo sapiens OX=9606 GN=ACOT9 PE=1 SV=2	16	0.000163095	0.00021036	0.300284	1	0.775313	-0.36715
ACOX1	Q15067	sp|Q15067|ACOX1_HUMAN Peroxisomal acyl-coenzyme A oxidase 1 OS=Homo sapiens OX=9606 GN=ACOX1 PE=1 SV=3	7	1.76023e-05	1.34704e-05	0.417394	1	1.30674	0.385969
ACOX3	O15254	sp|O15254|ACOX3_HUMAN Peroxisomal acyl-coenzyme A oxidase 3 OS=Homo sapiens OX=9606 GN=ACOX3 PE=1 SV=2	4	3.82874e-06	5.57269e-06	0.238252	1	0.687055	-0.541502
ACP1	P24666	sp|P24666|PPAC_HUMAN Low molecular weight phosphotyrosine protein phosphatase OS=Homo sapiens OX=9606 GN=ACP1 PE=1 SV=3	4	8.63208e-05	6.40306e-05	0.403806	1	1.34812	0.430948
ACP2	P11117	sp|P11117|PPAL_HUMAN Lysosomal acid phosphatase OS=Homo sapiens OX=9606 GN=ACP2 PE=1 SV=3	3	3.31162e-06	3.45064e-06	0.424247	1	0.959711	-0.0593279
ACSF2	Q96CM8	sp|Q96CM8|ACSF2_HUMAN Medium-chain acyl-CoA ligase ACSF2, mitochondrial OS=Homo sapiens OX=9606 GN=ACSF2 PE=1 SV=2	2	2.22763e-06	3.91195e-06	0.157553	1	0.569443	-0.812377
ACSF3	Q4G176	sp|Q4G176|ACSF3_HUMAN Malonate--CoA ligase ACSF3, mitochondrial OS=Homo sapiens OX=9606 GN=ACSF3 PE=1 SV=3	1	3.31659e-08	6.15394e-08	0.137773	1	0.538937	-0.891812
ACSL1	P33121	sp|P33121|ACSL1_HUMAN Long-chain-fatty-acid--CoA ligase 1 OS=Homo sapiens OX=9606 GN=ACSL1 PE=1 SV=1	8	6.484e-06	4.31791e-06	0.357782	1	1.50165	0.586552
ACSL3	O95573	sp|O95573|ACSL3_HUMAN Long-chain-fatty-acid--CoA ligase 3 OS=Homo sapiens OX=9606 GN=ACSL3 PE=1 SV=3	21	6.95141e-05	7.86081e-05	0.375028	1	0.884312	-0.177373
ACSL4	O60488	sp|O60488|ACSL4_HUMAN Long-chain-fatty-acid--CoA ligase 4 OS=Homo sapiens OX=9606 GN=ACSL4 PE=1 SV=2	22	0.000123315	0.000169764	0.265932	1	0.726393	-0.461177
ACSL5	Q9ULC5	sp|Q9ULC5|ACSL5_HUMAN Long-chain-fatty-acid--CoA ligase 5 OS=Homo sapiens OX=9606 GN=ACSL5 PE=1 SV=1	14	5.50941e-05	2.39884e-05	0.200275	1	2.2967	1.19956
ACTA1	P68133	sp|P68133|ACTS_HUMAN Actin, alpha skeletal muscle OS=Homo sapiens OX=9606 GN=ACTA1 PE=1 SV=1;sp|P68032|ACTC_HUMAN Actin, alpha cardiac muscle 1 OS=Homo sapiens OX=9606 GN=ACTC1 PE=1 SV=1;sp|P63267|ACTH_HUMAN Actin, gamma-enteric smooth muscle OS=Homo sapie	1	0.00146188	0.00163306	0.382271	1	0.895183	-0.159745
ACTB	P60709	sp|P60709|ACTB_HUMAN Actin, cytoplasmic 1 OS=Homo sapiens OX=9606 GN=ACTB PE=1 SV=1	1	0.000733926	0.000839594	0.368213	1	0.874144	-0.194058
ACTBL2	Q562R1	sp|Q562R1|ACTBL_HUMAN Beta-actin-like protein 2 OS=Homo sapiens OX=9606 GN=ACTBL2 PE=1 SV=2	1	0.00422654	6.15394e-08	1.45258e-35	4	68680.1	16.0676
ACTG1	P63261	sp|P63261|ACTG_HUMAN Actin, cytoplasmic 2 OS=Homo sapiens OX=9606 GN=ACTG1 PE=1 SV=1	1	0.0317239	0.0346909	0.395006	1	0.914473	-0.128988
ACTL6A	O96019	sp|O96019|ACL6A_HUMAN Actin-like protein 6A OS=Homo sapiens OX=9606 GN=ACTL6A PE=1 SV=1	10	8.60224e-05	0.000101674	0.349201	1	0.846062	-0.241164
ACTN1	P12814	sp|P12814|ACTN1_HUMAN Alpha-actinin-1 OS=Homo sapiens OX=9606 GN=ACTN1 PE=1 SV=2	30	0.000744865	0.000664294	0.485236	1	1.12129	0.165157
ACTN4	O43707	sp|O43707|ACTN4_HUMAN Alpha-actinin-4 OS=Homo sapiens OX=9606 GN=ACTN4 PE=1 SV=2	43	0.0034409	0.00313694	0.495067	1	1.0969	0.133425
ACTR10	Q9NZ32	sp|Q9NZ32|ARP10_HUMAN Actin-related protein 10 OS=Homo sapiens OX=9606 GN=ACTR10 PE=1 SV=1	3	9.01993e-06	6.15394e-08	1.91184e-08	4	146.571	7.19546
ACTR1A	P61163	sp|P61163|ACTZ_HUMAN Alpha-centractin OS=Homo sapiens OX=9606 GN=ACTR1A PE=1 SV=1	4	0.000110387	0.000117728	0.4101	1	0.937649	-0.0928805
ACTR1B	P42025	sp|P42025|ACTY_HUMAN Beta-centractin OS=Homo sapiens OX=9606 GN=ACTR1B PE=1 SV=1	1	2.69504e-05	2.12205e-05	0.429905	1	1.27002	0.344847
ACTR2	P61160	sp|P61160|ARP2_HUMAN Actin-related protein 2 OS=Homo sapiens OX=9606 GN=ACTR2 PE=1 SV=1	14	0.000386852	0.000363516	0.488043	1	1.0642	0.0897627
ACTR3	P61158	sp|P61158|ARP3_HUMAN Actin-related protein 3 OS=Homo sapiens OX=9606 GN=ACTR3 PE=1 SV=3	18	0.000373924	0.000262027	0.379317	1	1.42704	0.51303
ACYP1	P07311	sp|P07311|ACYP1_HUMAN Acylphosphatase-1 OS=Homo sapiens OX=9606 GN=ACYP1 PE=1 SV=2	3	4.99229e-05	2.56491e-05	0.256189	1	1.94638	0.960791
ADAM10	O14672	sp|O14672|ADA10_HUMAN Disintegrin and metalloproteinase domain-containing protein 10 OS=Homo sapiens OX=9606 GN=ADAM10 PE=1 SV=1	14	2.69504e-05	3.11849e-05	0.36152	1	0.864212	-0.210542
ADAM15	Q13444	sp|Q13444|ADA15_HUMAN Disintegrin and metalloproteinase domain-containing protein 15 OS=Homo sapiens OX=9606 GN=ADAM15 PE=1 SV=4	3	9.94479e-07	6.15394e-08	0.00123321	3	16.16	4.01436
ADAM9	Q13443	sp|Q13443|ADAM9_HUMAN Disintegrin and metalloproteinase domain-containing protein 9 OS=Homo sapiens OX=9606 GN=ADAM9 PE=1 SV=1	11	1.76023e-05	1.25478e-05	0.38664	1	1.40282	0.488331
ADAMTS15	Q8TE58	sp|Q8TE58|ATS15_HUMAN A disintegrin and metalloproteinase with thrombospondin motifs 15 OS=Homo sapiens OX=9606 GN=ADAMTS15 PE=2 SV=1	6	2.20774e-06	2.39884e-06	0.398848	1	0.920338	-0.119764
ADAMTS18	Q8TE60	sp|Q8TE60|ATS18_HUMAN A disintegrin and metalloproteinase with thrombospondin motifs 18 OS=Homo sapiens OX=9606 GN=ADAMTS18 PE=1 SV=3	1	2.01879e-05	6.15394e-08	7.67811e-11	4	328.049	8.35777
ADAR	P55265	sp|P55265|DSRAD_HUMAN Double-stranded RNA-specific adenosine deaminase OS=Homo sapiens OX=9606 GN=ADAR PE=1 SV=4	17	2.20774e-05	1.57032e-05	0.385693	1	1.40592	0.491517
ADD1	P35611	sp|P35611|ADDA_HUMAN Alpha-adducin OS=Homo sapiens OX=9606 GN=ADD1 PE=1 SV=2	6	1.34255e-05	6.77211e-06	0.249606	1	1.98247	0.987296
ADD3	Q9UEY8	sp|Q9UEY8|ADDG_HUMAN Gamma-adducin OS=Homo sapiens OX=9606 GN=ADD3 PE=1 SV=1	6	1.06409e-05	8.70963e-06	0.447024	1	1.22174	0.28894
ADH5	P11766	sp|P11766|ADHX_HUMAN Alcohol dehydrogenase class-3 OS=Homo sapiens OX=9606 GN=ADH5 PE=1 SV=4	10	8.3039e-05	5.92329e-05	0.386919	1	1.40191	0.487391
ADI1	Q9BV57	sp|Q9BV57|MTND_HUMAN 1,2-dihydroxy-3-keto-5-methylthiopentene dioxygenase OS=Homo sapiens OX=9606 GN=ADI1 PE=1 SV=1	6	4.13703e-05	1.2843e-05	0.11127	1	3.22123	1.68761
ADK	P55263	sp|P55263|ADK_HUMAN Adenosine kinase OS=Homo sapiens OX=9606 GN=ADK PE=1 SV=2	10	5.46964e-05	5.38816e-05	0.45876	1	1.01512	0.0216514
ADNP	Q9H2P0	sp|Q9H2P0|ADNP_HUMAN Activity-dependent neuroprotector homeobox protein OS=Homo sapiens OX=9606 GN=ADNP PE=1 SV=1	2	3.31659e-08	5.88638e-07	2.01515e-06	4	0.0563434	-4.14961
ADPGK	Q9BRR6	sp|Q9BRR6|ADPGK_HUMAN ADP-dependent glucokinase OS=Homo sapiens OX=9606 GN=ADPGK PE=1 SV=1	7	2.89393e-05	1.99288e-05	0.371905	1	1.45214	0.538176
ADPRHL2	Q9NX46	sp|Q9NX46|ARHL2_HUMAN ADP-ribose glycohydrolase ARH3 OS=Homo sapiens OX=9606 GN=ADPRHL2 PE=1 SV=1	4	1.02431e-05	9.79834e-06	0.476972	1	1.0454	0.0640488
ADRM1	Q16186	sp|Q16186|ADRM1_HUMAN Proteasomal ubiquitin receptor ADRM1 OS=Homo sapiens OX=9606 GN=ADRM1 PE=1 SV=2	4	5.91715e-05	3.52445e-05	0.312266	1	1.67889	0.747505
ADSL	P30566	sp|P30566|PUR8_HUMAN Adenylosuccinate lyase OS=Homo sapiens OX=9606 GN=ADSL PE=1 SV=2	8	4.13703e-05	2.41729e-05	0.30469	1	1.71143	0.775205
ADSS	P30520	sp|P30520|PURA2_HUMAN Adenylosuccinate synthetase isozyme 2 OS=Homo sapiens OX=9606 GN=ADSS PE=1 SV=3	14	0.000101437	9.28166e-05	0.49671	1	1.09287	0.128127
AFAP1	Q8N556	sp|Q8N556|AFAP1_HUMAN Actin filament-associated protein 1 OS=Homo sapiens OX=9606 GN=AFAP1 PE=1 SV=2	5	5.17129e-06	1.44484e-05	0.0419668	2	0.357915	-1.48231
AFAP1L2	Q8N4X5	sp|Q8N4X5|AF1L2_HUMAN Actin filament-associated protein 1-like 2 OS=Homo sapiens OX=9606 GN=AFAP1L2 PE=1 SV=1	10	1.21326e-05	4.9453e-06	0.180201	1	2.45337	1.29476
AFDN	P55196	sp|P55196|AFAD_HUMAN Afadin OS=Homo sapiens OX=9606 GN=AFDN PE=1 SV=3	14	5.68842e-06	4.72387e-06	0.453446	1	1.20419	0.26806
AFF1	P51825	sp|P51825|AFF1_HUMAN AF4/FMR2 family member 1 OS=Homo sapiens OX=9606 GN=AFF1 PE=1 SV=1	1	3.31659e-08	2.54646e-06	2.73999e-12	4	0.0130243	-6.26265
AFG3L2	Q9Y4W6	sp|Q9Y4W6|AFG32_HUMAN AFG3-like protein 2 OS=Homo sapiens OX=9606 GN=AFG3L2 PE=1 SV=2	19	5.40997e-05	3.506e-05	0.346465	1	1.54306	0.625795
AGAP3	Q96P47	sp|Q96P47|AGAP3_HUMAN Arf-GAP with GTPase, ANK repeat and PH domain-containing protein 3 OS=Homo sapiens OX=9606 GN=AGAP3 PE=1 SV=2	3	1.2431e-06	5.44352e-06	0.00757746	3	0.228363	-2.1306
AGFG1	P52594	sp|P52594|AGFG1_HUMAN Arf-GAP domain and FG repeat-containing protein 1 OS=Homo sapiens OX=9606 GN=AGFG1 PE=1 SV=2	1	5.56908e-06	6.15394e-08	3.55487e-07	4	90.4961	6.49978
AGK	Q53H12	sp|Q53H12|AGK_HUMAN Acylglycerol kinase, mitochondrial OS=Homo sapiens OX=9606 GN=AGK PE=1 SV=2	13	8.42324e-05	0.000109239	0.297323	1	0.77108	-0.375047
AGO2	Q9UKV8	sp|Q9UKV8|AGO2_HUMAN Protein argonaute-2 OS=Homo sapiens OX=9606 GN=AGO2 PE=1 SV=3	4	2.56576e-06	1.58323e-06	0.32642	1	1.62058	0.69651
AGPAT1	Q99943	sp|Q99943|PLCA_HUMAN 1-acyl-sn-glycerol-3-phosphate acyltransferase alpha OS=Homo sapiens OX=9606 GN=AGPAT1 PE=1 SV=2	2	2.76465e-05	3.52445e-05	0.306646	1	0.784421	-0.3503
AGPAT3	Q9NRZ7	sp|Q9NRZ7|PLCC_HUMAN 1-acyl-sn-glycerol-3-phosphate acyltransferase gamma OS=Homo sapiens OX=9606 GN=AGPAT3 PE=1 SV=1	1	3.31659e-08	6.15394e-08	0.137773	1	0.538937	-0.891812
AGPS	O00116	sp|O00116|ADAS_HUMAN Alkyldihydroxyacetonephosphate synthase, peroxisomal OS=Homo sapiens OX=9606 GN=AGPS PE=1 SV=1	23	0.000139227	0.000136365	0.462327	1	1.02099	0.0299687
AGRN	O00468	sp|O00468|AGRIN_HUMAN Agrin OS=Homo sapiens OX=9606 GN=AGRN PE=1 SV=6	2	1.621e-07	6.15394e-08	0.160048	1	2.63408	1.3973
AGTRAP	Q6RW13	sp|Q6RW13|ATRAP_HUMAN Type-1 angiotensin II receptor-associated protein OS=Homo sapiens OX=9606 GN=AGTRAP PE=1 SV=1	3	1.80001e-05	5.97865e-05	0.0228667	2	0.301073	-1.73182
AHCTF1	Q8WYP5	sp|Q8WYP5|ELYS_HUMAN Protein ELYS OS=Homo sapiens OX=9606 GN=AHCTF1 PE=1 SV=3	12	3.82874e-06	4.00422e-06	0.421997	1	0.956178	-0.0646484
AHCY	P23526	sp|P23526|SAHH_HUMAN Adenosylhomocysteinase OS=Homo sapiens OX=9606 GN=AHCY PE=1 SV=4	17	0.000510168	0.000376433	0.401512	1	1.35527	0.438578
AHCYL1	O43865	sp|O43865|SAHH2_HUMAN S-adenosylhomocysteine hydrolase-like protein 1 OS=Homo sapiens OX=9606 GN=AHCYL1 PE=1 SV=2;sp|Q96HN2|SAHH3_HUMAN Adenosylhomocysteinase 3 OS=Homo sapiens OX=9606 GN=AHCYL2 PE=1 SV=1	3	9.14921e-06	5.35126e-06	0.305081	1	1.70973	0.773769
AHNAK	Q09666	sp|Q09666|AHNK_HUMAN Neuroblast differentiation-associated protein AHNAK OS=Homo sapiens OX=9606 GN=AHNAK PE=1 SV=2	256	0.000786633	0.000880189	0.381291	1	0.893709	-0.162123
AHNAK2	Q8IVF2	sp|Q8IVF2|AHNK2_HUMAN Protein AHNAK2 OS=Homo sapiens OX=9606 GN=AHNAK2 PE=1 SV=2	2	3.31659e-08	6.27389e-07	1.24358e-06	4	0.0528634	-4.24159
AHSA1	O95433	sp|O95433|AHSA1_HUMAN Activator of 90 kDa heat shock protein ATPase homolog 1 OS=Homo sapiens OX=9606 GN=AHSA1 PE=1 SV=1	12	0.000158122	0.000111269	0.381105	1	1.42108	0.506985
AIDA	Q96BJ3	sp|Q96BJ3|AIDA_HUMAN Axin interactor, dorsalization-associated protein OS=Homo sapiens OX=9606 GN=AIDA PE=1 SV=1	2	7.2597e-06	6.15394e-08	7.38196e-08	4	117.968	6.88225
AIFM1	O95831	sp|O95831|AIFM1_HUMAN Apoptosis-inducing factor 1, mitochondrial OS=Homo sapiens OX=9606 GN=AIFM1 PE=1 SV=1	17	6.86191e-05	0.000106841	0.206957	1	0.642256	-0.638779
AIFM2	Q9BRQ8	sp|Q9BRQ8|AIFM2_HUMAN Apoptosis-inducing factor 2 OS=Homo sapiens OX=9606 GN=AIFM2 PE=1 SV=1	4	1.0442e-05	1.47067e-05	0.254402	1	0.710017	-0.494074
AIMP1	Q12904	sp|Q12904|AIMP1_HUMAN Aminoacyl tRNA synthase complex-interacting multifunctional protein 1 OS=Homo sapiens OX=9606 GN=AIMP1 PE=1 SV=2	15	0.000213813	0.000133781	0.332052	1	1.59823	0.676472
AIMP2	Q13155	sp|Q13155|AIMP2_HUMAN Aminoacyl tRNA synthase complex-interacting multifunctional protein 2 OS=Homo sapiens OX=9606 GN=AIMP2 PE=1 SV=2	6	0.000102431	7.63938e-05	0.40616	1	1.34083	0.42313
AIP	O00170	sp|O00170|AIP_HUMAN AH receptor-interacting protein OS=Homo sapiens OX=9606 GN=AIP PE=1 SV=2	8	5.40002e-05	4.6316e-05	0.467819	1	1.16591	0.221453
AK1	P00568	sp|P00568|KAD1_HUMAN Adenylate kinase isoenzyme 1 OS=Homo sapiens OX=9606 GN=AK1 PE=1 SV=3	7	9.55694e-05	0.000112192	0.353134	1	0.851839	-0.231347
AK2	P54819	sp|P54819|KAD2_HUMAN Adenylate kinase 2, mitochondrial OS=Homo sapiens OX=9606 GN=AK2 PE=1 SV=2	9	0.000205857	0.000150758	0.398261	1	1.36548	0.449411
AK3	Q9UIJ7	sp|Q9UIJ7|KAD3_HUMAN GTP:AMP phosphotransferase AK3, mitochondrial OS=Homo sapiens OX=9606 GN=AK3 PE=1 SV=4	3	9.75584e-06	6.71675e-06	0.371809	1	1.45246	0.538503
AK4	P27144	sp|P27144|KAD4_HUMAN Adenylate kinase 4, mitochondrial OS=Homo sapiens OX=9606 GN=AK4 PE=1 SV=1	12	0.000235692	0.000291551	0.323318	1	0.808405	-0.306849
AKAP1	Q92667	sp|Q92667|AKAP1_HUMAN A-kinase anchor protein 1, mitochondrial OS=Homo sapiens OX=9606 GN=AKAP1 PE=1 SV=1	1	2.96355e-06	6.15394e-08	1.06276e-05	4	48.1569	5.58967
AKAP17A	Q02040	sp|Q02040|AK17A_HUMAN A-kinase anchor protein 17A OS=Homo sapiens OX=9606 GN=AKAP17A PE=1 SV=2	2	3.31659e-08	9.96441e-07	2.81447e-08	4	0.0332843	-4.90901
AKAP2	Q9Y2D5	sp|Q9Y2D5|AKAP2_HUMAN A-kinase anchor protein 2 OS=Homo sapiens OX=9606 GN=AKAP2 PE=1 SV=3	11	3.33151e-05	2.12205e-05	0.339348	1	1.56995	0.650715
AKAP8	O43823	sp|O43823|AKAP8_HUMAN A-kinase anchor protein 8 OS=Homo sapiens OX=9606 GN=AKAP8 PE=1 SV=1	4	1.50166e-05	1.84342e-05	0.327609	1	0.814609	-0.29582
AKAP8L	Q9ULX6	sp|Q9ULX6|AKP8L_HUMAN A-kinase anchor protein 8-like OS=Homo sapiens OX=9606 GN=AKAP8L PE=1 SV=4	7	1.55139e-05	1.06656e-05	0.371195	1	1.45457	0.540593
AKR1A1	P14550	sp|P14550|AK1A1_HUMAN Aldo-keto reductase family 1 member A1 OS=Homo sapiens OX=9606 GN=AKR1A1 PE=1 SV=3	4	6.37461e-06	2.54646e-05	0.0111418	2	0.250332	-1.99808
AKR1B1	P15121	sp|P15121|ALDR_HUMAN Aldo-keto reductase family 1 member B1 OS=Homo sapiens OX=9606 GN=AKR1B1 PE=1 SV=3	18	0.000334145	0.000215896	0.34522	1	1.54772	0.630141
AKR1C3	P42330	sp|P42330|AK1C3_HUMAN Aldo-keto reductase family 1 member C3 OS=Homo sapiens OX=9606 GN=AKR1C3 PE=1 SV=4	6	3.49062e-05	2.56491e-05	0.399712	1	1.36091	0.444574
AKR1D1	P51857	sp|P51857|AK1D1_HUMAN Aldo-keto reductase family 1 member D1 OS=Homo sapiens OX=9606 GN=AKR1D1 PE=1 SV=1	1	5.75803e-06	5.59114e-06	0.467679	1	1.02985	0.0424337
AKR7A2	O43488	sp|O43488|ARK72_HUMAN Aflatoxin B1 aldehyde reductase member 2 OS=Homo sapiens OX=9606 GN=AKR7A2 PE=1 SV=3	7	0.000103426	8.50665e-05	0.449178	1	1.21582	0.281933
AKT1	P31749	sp|P31749|AKT1_HUMAN RAC-alpha serine/threonine-protein kinase OS=Homo sapiens OX=9606 GN=AKT1 PE=1 SV=2	2	8.14478e-07	6.15394e-08	0.00252649	3	13.2351	3.72629
ALCAM	Q13740	sp|Q13740|CD166_HUMAN CD166 antigen OS=Homo sapiens OX=9606 GN=ALCAM PE=1 SV=2	14	0.000141216	0.000143192	0.440932	1	0.986199	-0.0200494
ALDH16A1	Q8IZ83	sp|Q8IZ83|A16A1_HUMAN Aldehyde dehydrogenase family 16 member A1 OS=Homo sapiens OX=9606 GN=ALDH16A1 PE=1 SV=2	6	1.58122e-05	5.81257e-06	0.151416	1	2.72035	1.44379
ALDH18A1	P54886	sp|P54886|P5CS_HUMAN Delta-1-pyrroline-5-carboxylate synthase OS=Homo sapiens OX=9606 GN=ALDH18A1 PE=1 SV=2	30	0.00019094	0.000204824	0.406582	1	0.932215	-0.101265
ALDH1B1	P30837	sp|P30837|AL1B1_HUMAN Aldehyde dehydrogenase X, mitochondrial OS=Homo sapiens OX=9606 GN=ALDH1B1 PE=1 SV=3	14	0.000116354	0.000160538	0.264794	1	0.724777	-0.464391
ALDH2	P05091	sp|P05091|ALDH2_HUMAN Aldehyde dehydrogenase, mitochondrial OS=Homo sapiens OX=9606 GN=ALDH2 PE=1 SV=2	13	9.07959e-05	9.06023e-05	0.450808	1	1.00214	0.00308001
ALDH3A2	P51648	sp|P51648|AL3A2_HUMAN Aldehyde dehydrogenase family 3 member A2 OS=Homo sapiens OX=9606 GN=ALDH3A2 PE=1 SV=1	9	8.34368e-05	8.65427e-05	0.427042	1	0.964111	-0.0527289
ALDH3B1	P43353	sp|P43353|AL3B1_HUMAN Aldehyde dehydrogenase family 3 member B1 OS=Homo sapiens OX=9606 GN=ALDH3B1 PE=1 SV=1;sp|P48448|AL3B2_HUMAN Aldehyde dehydrogenase family 3 member B2 OS=Homo sapiens OX=9606 GN=ALDH3B2 PE=2 SV=3	3	3.31659e-08	5.77567e-06	1.55563e-16	4	0.00574235	-7.44414
ALDH6A1	Q02252	sp|Q02252|MMSA_HUMAN Methylmalonate-semialdehyde dehydrogenase [acylating], mitochondrial OS=Homo sapiens OX=9606 GN=ALDH6A1 PE=1 SV=2	10	1.50166e-05	1.93752e-05	0.300095	1	0.775043	-0.367653
ALDH7A1	P49419	sp|P49419|AL7A1_HUMAN Alpha-aminoadipic semialdehyde dehydrogenase OS=Homo sapiens OX=9606 GN=ALDH7A1 PE=1 SV=5	18	0.000126299	0.000108132	0.467019	1	1.168	0.224044
ALDH9A1	P49189	sp|P49189|AL9A1_HUMAN 4-trimethylaminobutyraldehyde dehydrogenase OS=Homo sapiens OX=9606 GN=ALDH9A1 PE=1 SV=3	9	6.06632e-05	3.57981e-05	0.308581	1	1.6946	0.760941
ALDOA	P04075	sp|P04075|ALDOA_HUMAN Fructose-bisphosphate aldolase A OS=Homo sapiens OX=9606 GN=ALDOA PE=1 SV=2	20	0.00240664	0.00188217	0.426923	1	1.27865	0.354626
ALDOC	P09972	sp|P09972|ALDOC_HUMAN Fructose-bisphosphate aldolase C OS=Homo sapiens OX=9606 GN=ALDOC PE=1 SV=2	2	3.31659e-08	1.109e-06	1.09039e-08	4	0.0299061	-5.06342
ALG1	Q9BT22	sp|Q9BT22|ALG1_HUMAN Chitobiosyldiphosphodolichol beta-mannosyltransferase OS=Homo sapiens OX=9606 GN=ALG1 PE=1 SV=2	6	1.83979e-05	6.43996e-06	0.138907	1	2.85683	1.51441
ALG2	Q9H553	sp|Q9H553|ALG2_HUMAN Alpha-1,3/1,6-mannosyltransferase ALG2 OS=Homo sapiens OX=9606 GN=ALG2 PE=1 SV=1	10	2.88399e-05	4.17029e-05	0.241414	1	0.691556	-0.532082
ALG3	Q92685	sp|Q92685|ALG3_HUMAN Dol-P-Man:Man(5)GlcNAc(2)-PP-Dol alpha-1,3-mannosyltransferase OS=Homo sapiens OX=9606 GN=ALG3 PE=1 SV=1	2	3.31659e-08	6.15394e-08	0.137773	1	0.538937	-0.891812
ALG5	Q9Y673	sp|Q9Y673|ALG5_HUMAN Dolichyl-phosphate beta-glucosyltransferase OS=Homo sapiens OX=9606 GN=ALG5 PE=1 SV=1	7	1.67072e-05	1.42639e-05	0.465764	1	1.1713	0.228109
ALG6	Q9Y672	sp|Q9Y672|ALG6_HUMAN Dolichyl pyrophosphate Man9GlcNAc2 alpha-1,3-glucosyltransferase OS=Homo sapiens OX=9606 GN=ALG6 PE=1 SV=2	1	4.05747e-06	4.35482e-06	0.406262	1	0.931721	-0.10203
ALG8	Q9BVK2	sp|Q9BVK2|ALG8_HUMAN Probable dolichyl pyrophosphate Glc1Man9GlcNAc2 alpha-1,3-glucosyltransferase OS=Homo sapiens OX=9606 GN=ALG8 PE=1 SV=2	3	1.68067e-05	1.2474e-05	0.404056	1	1.34734	0.430116
ALG9	Q9H6U8	sp|Q9H6U8|ALG9_HUMAN Alpha-1,2-mannosyltransferase ALG9 OS=Homo sapiens OX=9606 GN=ALG9 PE=1 SV=2	6	3.31659e-08	1.64044e-05	5.86221e-23	4	0.00202177	-8.95016
ALYREF	Q86V81	sp|Q86V81|THOC4_HUMAN THO complex subunit 4 OS=Homo sapiens OX=9606 GN=ALYREF PE=1 SV=3	8	0.000716025	0.000555424	0.423332	1	1.28915	0.366422
AMPD2	Q01433	sp|Q01433|AMPD2_HUMAN AMP deaminase 2 OS=Homo sapiens OX=9606 GN=AMPD2 PE=1 SV=2	4	2.37681e-06	2.01133e-06	0.461825	1	1.18171	0.240871
AMY1A	P04745	sp|P04745|AMY1_HUMAN Alpha-amylase 1 OS=Homo sapiens OX=9606 GN=AMY1A PE=1 SV=2;sp|P19961|AMY2B_HUMAN Alpha-amylase 2B OS=Homo sapiens OX=9606 GN=AMY2B PE=1 SV=1;sp|P04746|AMYP_HUMAN Pancreatic alpha-amylase OS=Homo sapiens OX=9606 GN=AMY2A PE=1 SV=2	2	1.44199e-06	5.86793e-06	0.0103244	2	0.245742	-2.02479
ANAPC13	Q9BS18	sp|Q9BS18|APC13_HUMAN Anaphase-promoting complex subunit 13 OS=Homo sapiens OX=9606 GN=ANAPC13 PE=1 SV=1	1	6.28511e-06	6.15394e-08	1.75379e-07	4	102.131	6.67428
ANAPC4	Q9UJX5	sp|Q9UJX5|APC4_HUMAN Anaphase-promoting complex subunit 4 OS=Homo sapiens OX=9606 GN=ANAPC4 PE=1 SV=2	1	3.31659e-08	6.15394e-08	0.137773	1	0.538937	-0.891812
ANAPC7	Q9UJX3	sp|Q9UJX3|APC7_HUMAN Anaphase-promoting complex subunit 7 OS=Homo sapiens OX=9606 GN=ANAPC7 PE=1 SV=4	2	3.12266e-06	6.15394e-08	8.16646e-06	4	50.7425	5.66512
ANGPTL4	Q9BY76	sp|Q9BY76|ANGL4_HUMAN Angiopoietin-related protein 4 OS=Homo sapiens OX=9606 GN=ANGPTL4 PE=1 SV=2	7	6.64312e-05	2.41729e-05	0.148757	1	2.74817	1.45847
ANK1	P16157	sp|P16157|ANK1_HUMAN Ankyrin-1 OS=Homo sapiens OX=9606 GN=ANK1 PE=1 SV=3	3	4.17681e-07	4.83458e-07	0.361339	1	0.863945	-0.210989
ANKFY1	Q9P2R3	sp|Q9P2R3|ANFY1_HUMAN Rabankyrin-5 OS=Homo sapiens OX=9606 GN=ANKFY1 PE=1 SV=2	9	8.84092e-06	4.11493e-06	0.221876	1	2.1485	1.10333
ANKHD1	Q8IWZ3	sp|Q8IWZ3|ANKH1_HUMAN Ankyrin repeat and KH domain-containing protein 1 OS=Homo sapiens OX=9606 GN=ANKHD1 PE=1 SV=1	2	5.91715e-07	6.15394e-08	0.00723238	3	9.61522	3.26532
ANKRD13A	Q8IZ07	sp|Q8IZ07|AN13A_HUMAN Ankyrin repeat domain-containing protein 13A OS=Homo sapiens OX=9606 GN=ANKRD13A PE=1 SV=3	3	2.89393e-06	7.32569e-07	0.0737379	1	3.95039	1.982
ANKRD17	O75179	sp|O75179|ANR17_HUMAN Ankyrin repeat domain-containing protein 17 OS=Homo sapiens OX=9606 GN=ANKRD17 PE=1 SV=3	3	4.87295e-06	9.87215e-07	0.0447378	2	4.93606	2.30336
ANKRD18B	A2A2Z9	sp|A2A2Z9|AN18B_HUMAN Ankyrin repeat domain-containing protein 18B OS=Homo sapiens OX=9606 GN=ANKRD18B PE=1 SV=1;sp|Q8IVF6|AN18A_HUMAN Ankyrin repeat domain-containing protein 18A OS=Homo sapiens OX=9606 GN=ANKRD18A PE=2 SV=3	2	3.1525e-06	6.15394e-08	7.78181e-06	4	51.2273	5.67884
ANKRD28	O15084	sp|O15084|ANR28_HUMAN Serine/threonine-protein phosphatase 6 regulatory ankyrin repeat subunit A OS=Homo sapiens OX=9606 GN=ANKRD28 PE=1 SV=5	4	4.55471e-06	2.76789e-06	0.320264	1	1.64555	0.718573
ANKZF1	Q9H8Y5	sp|Q9H8Y5|ANKZ1_HUMAN Ankyrin repeat and zinc finger domain-containing protein 1 OS=Homo sapiens OX=9606 GN=ANKZF1 PE=1 SV=1	2	3.31659e-08	1.49651e-06	6.63601e-10	4	0.0221622	-5.49576
ANLN	Q9NQW6	sp|Q9NQW6|ANLN_HUMAN Anillin OS=Homo sapiens OX=9606 GN=ANLN PE=1 SV=2	11	6.51384e-06	3.506e-06	0.273253	1	1.85791	0.893684
ANO10	Q9NW15	sp|Q9NW15|ANO10_HUMAN Anoctamin-10 OS=Homo sapiens OX=9606 GN=ANO10 PE=1 SV=2	4	4.76355e-06	1.2474e-05	0.0518375	1	0.38188	-1.38881
ANO6	Q4KMQ2	sp|Q4KMQ2|ANO6_HUMAN Anoctamin-6 OS=Homo sapiens OX=9606 GN=ANO6 PE=1 SV=2	3	7.22986e-06	6.15394e-08	7.56937e-08	4	117.483	6.87631
ANP32A	P39687	sp|P39687|AN32A_HUMAN Acidic leucine-rich nuclear phosphoprotein 32 family member A OS=Homo sapiens OX=9606 GN=ANP32A PE=1 SV=1	6	0.000398786	0.000262027	0.352186	1	1.52193	0.605899
ANP32B	Q92688	sp|Q92688|AN32B_HUMAN Acidic leucine-rich nuclear phosphoprotein 32 family member B OS=Homo sapiens OX=9606 GN=ANP32B PE=1 SV=1	3	0.000108398	0.000156478	0.242244	1	0.692737	-0.52962
ANP32E	Q9BTT0	sp|Q9BTT0|AN32E_HUMAN Acidic leucine-rich nuclear phosphoprotein 32 family member E OS=Homo sapiens OX=9606 GN=ANP32E PE=1 SV=1	5	0.000187957	0.000119942	0.340103	1	1.56706	0.648063
ANTXR1	Q9H6X2	sp|Q9H6X2|ANTR1_HUMAN Anthrax toxin receptor 1 OS=Homo sapiens OX=9606 GN=ANTXR1 PE=1 SV=2	1	3.31659e-08	2.17741e-06	1.48016e-11	4	0.0152318	-6.03677
ANTXR2	P58335	sp|P58335|ANTR2_HUMAN Anthrax toxin receptor 2 OS=Homo sapiens OX=9606 GN=ANTXR2 PE=1 SV=5	1	3.31659e-08	6.15394e-08	0.137773	1	0.538937	-0.891812
ANXA1	P04083	sp|P04083|ANXA1_HUMAN Annexin A1 OS=Homo sapiens OX=9606 GN=ANXA1 PE=1 SV=2	23	0.00254587	0.00333992	0.291139	1	0.762253	-0.391658
ANXA11	P50995	sp|P50995|ANX11_HUMAN Annexin A11 OS=Homo sapiens OX=9606 GN=ANXA11 PE=1 SV=1	16	0.000213813	0.000345064	0.191354	1	0.619633	-0.690513
ANXA2	P07355	sp|P07355|ANXA2_HUMAN Annexin A2 OS=Homo sapiens OX=9606 GN=ANXA2 PE=1 SV=2;sp|A6NMY6|AXA2L_HUMAN Putative annexin A2-like protein OS=Homo sapiens OX=9606 GN=ANXA2P2 PE=5 SV=2	32	0.0174034	0.0195598	0.37866	1	0.889754	-0.168521
ANXA3	P12429	sp|P12429|ANXA3_HUMAN Annexin A3 OS=Homo sapiens OX=9606 GN=ANXA3 PE=1 SV=3	13	0.000198896	0.000271253	0.270757	1	0.733247	-0.447628
ANXA4	P09525	sp|P09525|ANXA4_HUMAN Annexin A4 OS=Homo sapiens OX=9606 GN=ANXA4 PE=1 SV=4	12	0.000231714	0.000230658	0.45231	1	1.00458	0.00659004
ANXA5	P08758	sp|P08758|ANXA5_HUMAN Annexin A5 OS=Homo sapiens OX=9606 GN=ANXA5 PE=1 SV=2	21	0.00123315	0.00267563	0.0910657	1	0.460884	-1.11752
ANXA6	P08133	sp|P08133|ANXA6_HUMAN Annexin A6 OS=Homo sapiens OX=9606 GN=ANXA6 PE=1 SV=3	33	0.000371935	0.000361671	0.466794	1	1.02838	0.0403728
ANXA7	P20073	sp|P20073|ANXA7_HUMAN Annexin A7 OS=Homo sapiens OX=9606 GN=ANXA7 PE=1 SV=3	16	0.000152155	0.000149651	0.459744	1	1.01674	0.023946
ANXA8L1	Q5VT79	sp|Q5VT79|AXA81_HUMAN Annexin A8-like protein 1 OS=Homo sapiens OX=9606 GN=ANXA8L1 PE=2 SV=2;sp|P13928|ANXA8_HUMAN Annexin A8 OS=Homo sapiens OX=9606 GN=ANXA8 PE=1 SV=3	4	9.48733e-06	8.59892e-06	0.492457	1	1.10332	0.141847
AP1B1	Q10567	sp|Q10567|AP1B1_HUMAN AP-1 complex subunit beta-1 OS=Homo sapiens OX=9606 GN=AP1B1 PE=1 SV=2	12	4.52488e-05	1.15144e-05	0.074562	1	3.92975	1.97444
AP1G1	O43747	sp|O43747|AP1G1_HUMAN AP-1 complex subunit gamma-1 OS=Homo sapiens OX=9606 GN=AP1G1 PE=1 SV=5	10	1.87957e-05	9.76143e-06	0.260095	1	1.9255	0.945235
AP1M1	Q9BXS5	sp|Q9BXS5|AP1M1_HUMAN AP-1 complex subunit mu-1 OS=Homo sapiens OX=9606 GN=AP1M1 PE=1 SV=3	15	9.2586e-05	4.55779e-05	0.241013	1	2.03138	1.02246
AP1S1	P61966	sp|P61966|AP1S1_HUMAN AP-1 complex subunit sigma-1A OS=Homo sapiens OX=9606 GN=AP1S1 PE=1 SV=1	2	1.34255e-05	2.39884e-05	0.151139	1	0.559665	-0.837364
AP1S2	P56377	sp|P56377|AP1S2_HUMAN AP-1 complex subunit sigma-2 OS=Homo sapiens OX=9606 GN=AP1S2 PE=1 SV=1	3	2.17791e-05	1.81574e-05	0.455192	1	1.19946	0.262389
AP2A1	O95782	sp|O95782|AP2A1_HUMAN AP-2 complex subunit alpha-1 OS=Homo sapiens OX=9606 GN=AP2A1 PE=1 SV=3	30	0.000151161	0.000147067	0.466465	1	1.02783	0.0396079
AP2A2	O94973	sp|O94973|AP2A2_HUMAN AP-2 complex subunit alpha-2 OS=Homo sapiens OX=9606 GN=AP2A2 PE=1 SV=2	15	1.72045e-05	2.63872e-05	0.213726	1	0.652001	-0.617055
AP2B1	P63010	sp|P63010|AP2B1_HUMAN AP-2 complex subunit beta OS=Homo sapiens OX=9606 GN=AP2B1 PE=1 SV=1	20	0.000275471	0.00028417	0.43038	1	0.969386	-0.0448562
AP2M1	Q96CW1	sp|Q96CW1|AP2M1_HUMAN AP-2 complex subunit mu OS=Homo sapiens OX=9606 GN=AP2M1 PE=1 SV=2	18	0.000182984	0.000154817	0.461738	1	1.18194	0.241151
AP2S1	P53680	sp|P53680|AP2S1_HUMAN AP-2 complex subunit sigma OS=Homo sapiens OX=9606 GN=AP2S1 PE=1 SV=2	5	6.34478e-05	0.000137841	0.0907407	1	0.460297	-1.11936
AP3B1	O00203	sp|O00203|AP3B1_HUMAN AP-3 complex subunit beta-1 OS=Homo sapiens OX=9606 GN=AP3B1 PE=1 SV=3	12	1.51161e-05	2.93396e-05	0.122912	1	0.51521	-0.956767
AP3D1	O14617	sp|O14617|AP3D1_HUMAN AP-3 complex subunit delta-1 OS=Homo sapiens OX=9606 GN=AP3D1 PE=1 SV=1	21	3.85858e-05	3.04468e-05	0.430841	1	1.26732	0.341779
AP3M1	Q9Y2T2	sp|Q9Y2T2|AP3M1_HUMAN AP-3 complex subunit mu-1 OS=Homo sapiens OX=9606 GN=AP3M1 PE=1 SV=1	9	3.94808e-05	1.5574e-05	0.170724	1	2.53505	1.34201
AP3S1	Q92572	sp|Q92572|AP3S1_HUMAN AP-3 complex subunit sigma-1 OS=Homo sapiens OX=9606 GN=AP3S1 PE=1 SV=1	4	3.91825e-05	4.13338e-05	0.416734	1	0.947951	-0.0771149
APBB2	Q92870	sp|Q92870|APBB2_HUMAN Amyloid-beta A4 precursor protein-binding family B member 2 OS=Homo sapiens OX=9606 GN=APBB2 PE=1 SV=3	2	2.11824e-06	1.19573e-06	0.291288	1	1.77151	0.824976
APEH	P13798	sp|P13798|ACPH_HUMAN Acylamino-acid-releasing enzyme OS=Homo sapiens OX=9606 GN=APEH PE=1 SV=4	6	1.72045e-05	1.35073e-05	0.428624	1	1.27372	0.349045
APEX1	P27695	sp|P27695|APEX1_HUMAN DNA-(apurinic or apyrimidinic site) lyase OS=Homo sapiens OX=9606 GN=APEX1 PE=1 SV=2	11	0.000335139	0.000215896	0.343993	1	1.55232	0.634428
APH1A	Q96BI3	sp|Q96BI3|APH1A_HUMAN Gamma-secretase subunit APH-1A OS=Homo sapiens OX=9606 GN=APH1A PE=1 SV=1	1	2.17791e-05	2.73099e-05	0.31574	1	0.797481	-0.326478
API5	Q9BZZ5	sp|Q9BZZ5|API5_HUMAN Apoptosis inhibitor 5 OS=Homo sapiens OX=9606 GN=API5 PE=1 SV=3	11	0.000109393	4.53934e-05	0.185513	1	2.40988	1.26896
APIP	Q96GX9	sp|Q96GX9|MTNB_HUMAN Methylthioribulose-1-phosphate dehydratase OS=Homo sapiens OX=9606 GN=APIP PE=1 SV=1	2	3.34145e-06	6.15394e-08	5.77805e-06	4	54.2977	5.76282
APLP2	Q06481	sp|Q06481|APLP2_HUMAN Amyloid-like protein 2 OS=Homo sapiens OX=9606 GN=APLP2 PE=1 SV=2	6	1.45194e-05	1.93752e-05	0.282102	1	0.749379	-0.416233
APMAP	Q9HDC9	sp|Q9HDC9|APMAP_HUMAN Adipocyte plasma membrane-associated protein OS=Homo sapiens OX=9606 GN=APMAP PE=1 SV=2	22	0.000442543	0.000610781	0.264636	1	0.724553	-0.464838
APOB	P04114	sp|P04114|APOB_HUMAN Apolipoprotein B-100 OS=Homo sapiens OX=9606 GN=APOB PE=1 SV=2	4	6.42434e-07	6.15394e-08	0.00557944	3	10.4394	3.38396
APOBEC3B	Q9UH17	sp|Q9UH17|ABC3B_HUMAN DNA dC->dU-editing enzyme APOBEC-3B OS=Homo sapiens OX=9606 GN=APOBEC3B PE=1 SV=1	5	3.31659e-08	6.16317e-06	6.68991e-17	4	0.0053813	-7.53783
APOBEC3C	Q9NRW3	sp|Q9NRW3|ABC3C_HUMAN DNA dC->dU-editing enzyme APOBEC-3C OS=Homo sapiens OX=9606 GN=APOBEC3C PE=1 SV=2	3	1.10387e-05	6.15394e-08	5.16614e-09	4	179.376	7.48685
APOC3	P02656	sp|P02656|APOC3_HUMAN Apolipoprotein C-III OS=Homo sapiens OX=9606 GN=APOC3 PE=1 SV=1	1	8.63208e-05	0.00012068	0.258112	1	0.715286	-0.483407
APOO	Q9BUR5	sp|Q9BUR5|MIC26_HUMAN MICOS complex subunit MIC26 OS=Homo sapiens OX=9606 GN=APOO PE=1 SV=1	4	5.34035e-05	5.35126e-05	0.448233	1	0.997962	-0.00294263
APOOL	Q6UXV4	sp|Q6UXV4|MIC27_HUMAN MICOS complex subunit MIC27 OS=Homo sapiens OX=9606 GN=APOOL PE=1 SV=1	4	7.31937e-06	7.71319e-06	0.417369	1	0.948941	-0.075609
APP	P05067	sp|P05067|A4_HUMAN Amyloid-beta precursor protein OS=Homo sapiens OX=9606 GN=APP PE=1 SV=3	7	5.23096e-06	9.41083e-06	0.148651	1	0.555845	-0.847246
APPL1	Q9UKG1	sp|Q9UKG1|DP13A_HUMAN DCC-interacting protein 13-alpha OS=Homo sapiens OX=9606 GN=APPL1 PE=1 SV=1	9	1.54144e-05	1.66443e-06	0.00812052	3	9.26111	3.21119
APRT	P07741	sp|P07741|APT_HUMAN Adenine phosphoribosyltransferase OS=Homo sapiens OX=9606 GN=APRT PE=1 SV=2	6	8.04534e-05	2.06669e-05	0.0760632	1	3.89286	1.96083
AQR	O60306	sp|O60306|AQR_HUMAN RNA helicase aquarius OS=Homo sapiens OX=9606 GN=AQR PE=1 SV=4	9	1.73039e-06	8.45129e-06	0.00467784	3	0.204749	-2.28807
ARAF	P10398	sp|P10398|ARAF_HUMAN Serine/threonine-protein kinase A-Raf OS=Homo sapiens OX=9606 GN=ARAF PE=1 SV=2	1	7.0608e-06	3.37683e-06	0.231033	1	2.09096	1.06416
ARAP1	Q96P48	sp|Q96P48|ARAP1_HUMAN Arf-GAP with Rho-GAP domain, ANK repeat and PH domain-containing protein 1 OS=Homo sapiens OX=9606 GN=ARAP1 PE=1 SV=3	2	3.56024e-07	6.15394e-08	0.0303207	2	5.78529	2.53239
ARCN1	P48444	sp|P48444|COPD_HUMAN Coatomer subunit delta OS=Homo sapiens OX=9606 GN=ARCN1 PE=1 SV=1	23	0.000197901	0.000150573	0.414865	1	1.31432	0.394316
ARF1	P84077	sp|P84077|ARF1_HUMAN ADP-ribosylation factor 1 OS=Homo sapiens OX=9606 GN=ARF1 PE=1 SV=2;sp|P61204|ARF3_HUMAN ADP-ribosylation factor 3 OS=Homo sapiens OX=9606 GN=ARF3 PE=1 SV=2	4	0.000738898	0.000763938	0.429012	1	0.967222	-0.0480804
ARF4	P18085	sp|P18085|ARF4_HUMAN ADP-ribosylation factor 4 OS=Homo sapiens OX=9606 GN=ARF4 PE=1 SV=3	6	0.0013326	0.00177514	0.283032	1	0.750702	-0.413688
ARF5	P84085	sp|P84085|ARF5_HUMAN ADP-ribosylation factor 5 OS=Homo sapiens OX=9606 GN=ARF5 PE=1 SV=2	4	2.97349e-05	4.53934e-05	0.215849	1	0.655049	-0.610325
ARF6	P62330	sp|P62330|ARF6_HUMAN ADP-ribosylation factor 6 OS=Homo sapiens OX=9606 GN=ARF6 PE=1 SV=2	5	0.000366963	0.000380124	0.427844	1	0.965377	-0.0508353
ARFGAP1	Q8N6T3	sp|Q8N6T3|ARFG1_HUMAN ADP-ribosylation factor GTPase-activating protein 1 OS=Homo sapiens OX=9606 GN=ARFGAP1 PE=1 SV=2	11	3.87847e-05	1.54817e-05	0.174115	1	2.50519	1.32492
ARFGAP3	Q9NP61	sp|Q9NP61|ARFG3_HUMAN ADP-ribosylation factor GTPase-activating protein 3 OS=Homo sapiens OX=9606 GN=ARFGAP3 PE=1 SV=1	3	2.29725e-06	6.15394e-08	3.65697e-05	4	37.3297	5.22225
ARFGEF2	Q9Y6D5	sp|Q9Y6D5|BIG2_HUMAN Brefeldin A-inhibited guanine nucleotide-exchange protein 2 OS=Homo sapiens OX=9606 GN=ARFGEF2 PE=1 SV=3	10	3.01327e-06	1.88217e-06	0.331357	1	1.60096	0.678937
ARFIP1	P53367	sp|P53367|ARFP1_HUMAN Arfaptin-1 OS=Homo sapiens OX=9606 GN=ARFIP1 PE=1 SV=2	7	1.76023e-05	1.02966e-05	0.305127	1	1.70953	0.773601
ARFIP2	P53365	sp|P53365|ARFP2_HUMAN Arfaptin-2 OS=Homo sapiens OX=9606 GN=ARFIP2 PE=1 SV=1	5	4.4851e-06	3.43219e-06	0.417381	1	1.30678	0.386013
ARFRP1	Q13795	sp|Q13795|ARFRP_HUMAN ADP-ribosylation factor-related protein 1 OS=Homo sapiens OX=9606 GN=ARFRP1 PE=1 SV=1	3	1.09393e-05	2.23277e-05	0.107686	1	0.489943	-1.02932
ARHGAP1	Q07960	sp|Q07960|RHG01_HUMAN Rho GTPase-activating protein 1 OS=Homo sapiens OX=9606 GN=ARHGAP1 PE=1 SV=1	14	0.000107404	6.91973e-05	0.344042	1	1.55214	0.634257
ARHGAP17	Q68EM7	sp|Q68EM7|RHG17_HUMAN Rho GTPase-activating protein 17 OS=Homo sapiens OX=9606 GN=ARHGAP17 PE=1 SV=1	3	3.7293e-06	4.52089e-06	0.334707	1	0.824903	-0.277703
ARHGAP18	Q8N392	sp|Q8N392|RHG18_HUMAN Rho GTPase-activating protein 18 OS=Homo sapiens OX=9606 GN=ARHGAP18 PE=1 SV=3	8	9.87518e-06	8.30367e-06	0.458992	1	1.18925	0.250057
ARHGAP29	Q52LW3	sp|Q52LW3|RHG29_HUMAN Rho GTPase-activating protein 29 OS=Homo sapiens OX=9606 GN=ARHGAP29 PE=1 SV=2	15	1.16354e-05	9.54e-06	0.447786	1	1.21964	0.286461
ARHGAP35	Q9NRY4	sp|Q9NRY4|RHG35_HUMAN Rho GTPase-activating protein 35 OS=Homo sapiens OX=9606 GN=ARHGAP35 PE=1 SV=3	4	1.3326e-06	7.82391e-07	0.306575	1	1.70324	0.768285
ARHGAP45	Q92619	sp|Q92619|HMHA1_HUMAN Rho GTPase-activating protein 45 OS=Homo sapiens OX=9606 GN=ARHGAP45 PE=1 SV=2	4	6.06632e-06	7.63938e-07	0.0128383	2	7.94086	2.98929
ARHGDIA	P52565	sp|P52565|GDIR1_HUMAN Rho GDP-dissociation inhibitor 1 OS=Homo sapiens OX=9606 GN=ARHGDIA PE=1 SV=3	8	0.00212819	0.00183419	0.469974	1	1.16029	0.214481
ARHGDIB	P52566	sp|P52566|GDIR2_HUMAN Rho GDP-dissociation inhibitor 2 OS=Homo sapiens OX=9606 GN=ARHGDIB PE=1 SV=3	4	2.7746e-05	7.71319e-06	0.0895497	1	3.59721	1.84688
ARHGEF1	Q92888	sp|Q92888|ARHG1_HUMAN Rho guanine nucleotide exchange factor 1 OS=Homo sapiens OX=9606 GN=ARHGEF1 PE=1 SV=2	15	2.98344e-05	1.91907e-05	0.343382	1	1.55463	0.636567
ARHGEF12	Q9NZN5	sp|Q9NZN5|ARHGC_HUMAN Rho guanine nucleotide exchange factor 12 OS=Homo sapiens OX=9606 GN=ARHGEF12 PE=1 SV=1	4	1.56133e-06	2.74944e-07	0.0317792	2	5.67873	2.50557
ARHGEF2	Q92974	sp|Q92974|ARHG2_HUMAN Rho guanine nucleotide exchange factor 2 OS=Homo sapiens OX=9606 GN=ARHGEF2 PE=1 SV=4	17	1.80995e-05	1.65151e-05	0.495457	1	1.09594	0.132167
ARHGEF28	Q8N1W1	sp|Q8N1W1|ARG28_HUMAN Rho guanine nucleotide exchange factor 28 OS=Homo sapiens OX=9606 GN=ARHGEF28 PE=1 SV=3	3	3.31659e-08	6.15394e-08	0.137773	1	0.538937	-0.891812
ARHGEF7	Q14155	sp|Q14155|ARHG7_HUMAN Rho guanine nucleotide exchange factor 7 OS=Homo sapiens OX=9606 GN=ARHGEF7 PE=1 SV=2	1	3.31659e-08	6.15394e-08	0.137773	1	0.538937	-0.891812
ARID1A	O14497	sp|O14497|ARI1A_HUMAN AT-rich interactive domain-containing protein 1A OS=Homo sapiens OX=9606 GN=ARID1A PE=1 SV=3	8	3.46079e-06	2.76789e-06	0.436791	1	1.25033	0.322313
ARIH1	Q9Y4X5	sp|Q9Y4X5|ARI1_HUMAN E3 ubiquitin-protein ligase ARIH1 OS=Homo sapiens OX=9606 GN=ARIH1 PE=1 SV=2	1	3.31659e-08	6.15394e-08	0.137773	1	0.538937	-0.891812
ARL1	P40616	sp|P40616|ARL1_HUMAN ADP-ribosylation factor-like protein 1 OS=Homo sapiens OX=9606 GN=ARL1 PE=1 SV=1	8	0.000247625	0.000311849	0.313358	1	0.794055	-0.332689
ARL2	P36404	sp|P36404|ARL2_HUMAN ADP-ribosylation factor-like protein 2 OS=Homo sapiens OX=9606 GN=ARL2 PE=1 SV=4	2	3.35139e-05	1.48728e-05	0.20631	1	2.25337	1.17209
ARL3	P36405	sp|P36405|ARL3_HUMAN ADP-ribosylation factor-like protein 3 OS=Homo sapiens OX=9606 GN=ARL3 PE=1 SV=2	4	4.51494e-05	2.87861e-05	0.339741	1	1.56844	0.649334
ARL6IP1	Q15041	sp|Q15041|AR6P1_HUMAN ADP-ribosylation factor-like protein 6-interacting protein 1 OS=Homo sapiens OX=9606 GN=ARL6IP1 PE=1 SV=2	2	0.000142211	0.00024542	0.164187	1	0.579458	-0.787223
ARL6IP4	Q66PJ3	sp|Q66PJ3|AR6P4_HUMAN ADP-ribosylation factor-like protein 6-interacting protein 4 OS=Homo sapiens OX=9606 GN=ARL6IP4 PE=1 SV=2	1	3.5304e-06	4.11493e-06	0.357281	1	0.857949	-0.221037
ARL6IP5	O75915	sp|O75915|PRAF3_HUMAN PRA1 family protein 3 OS=Homo sapiens OX=9606 GN=ARL6IP5 PE=1 SV=1	4	0.000443538	0.000470542	0.413301	1	0.942611	-0.0852654
ARL8B	Q9NVJ2	sp|Q9NVJ2|ARL8B_HUMAN ADP-ribosylation factor-like protein 8B OS=Homo sapiens OX=9606 GN=ARL8B PE=1 SV=1;sp|Q96BM9|ARL8A_HUMAN ADP-ribosylation factor-like protein 8A OS=Homo sapiens OX=9606 GN=ARL8A PE=1 SV=1	5	0.000188951	0.000201133	0.411251	1	0.939431	-0.0901405
ARMC10	Q8N2F6	sp|Q8N2F6|ARM10_HUMAN Armadillo repeat-containing protein 10 OS=Homo sapiens OX=9606 GN=ARMC10 PE=1 SV=1	4	1.00442e-05	6.15394e-08	9.58297e-09	4	163.216	7.35064
ARMC6	Q6NXE6	sp|Q6NXE6|ARMC6_HUMAN Armadillo repeat-containing protein 6 OS=Homo sapiens OX=9606 GN=ARMC6 PE=1 SV=2	8	1.23315e-05	1.75484e-05	0.249262	1	0.702715	-0.508989
ARMCX3	Q9UH62	sp|Q9UH62|ARMX3_HUMAN Armadillo repeat-containing X-linked protein 3 OS=Homo sapiens OX=9606 GN=ARMCX3 PE=1 SV=1	2	2.04863e-06	6.15394e-08	6.21581e-05	4	33.2897	5.057
ARPC1A	Q92747	sp|Q92747|ARC1A_HUMAN Actin-related protein 2/3 complex subunit 1A OS=Homo sapiens OX=9606 GN=ARPC1A PE=2 SV=2	6	2.5757e-05	7.84236e-06	0.107202	1	3.28434	1.71561
ARPC1B	O15143	sp|O15143|ARC1B_HUMAN Actin-related protein 2/3 complex subunit 1B OS=Homo sapiens OX=9606 GN=ARPC1B PE=1 SV=3	11	0.000224752	0.000157954	0.380559	1	1.42289	0.508828
ARPC2	O15144	sp|O15144|ARPC2_HUMAN Actin-related protein 2/3 complex subunit 2 OS=Homo sapiens OX=9606 GN=ARPC2 PE=1 SV=1	14	0.000247625	0.000252801	0.436761	1	0.979528	-0.029842
ARPC3	O15145	sp|O15145|ARPC3_HUMAN Actin-related protein 2/3 complex subunit 3 OS=Homo sapiens OX=9606 GN=ARPC3 PE=1 SV=3	6	0.00013326	0.000135442	0.439491	1	0.98389	-0.0234308
ARPC4	P59998	sp|P59998|ARPC4_HUMAN Actin-related protein 2/3 complex subunit 4 OS=Homo sapiens OX=9606 GN=ARPC4 PE=1 SV=3	7	0.00035304	0.000176038	0.245517	1	2.00548	1.00395
ARPC5	O15511	sp|O15511|ARPC5_HUMAN Actin-related protein 2/3 complex subunit 5 OS=Homo sapiens OX=9606 GN=ARPC5 PE=1 SV=3	7	0.000123315	0.000111085	0.489717	1	1.1101	0.150693
ARPC5L	Q9BPX5	sp|Q9BPX5|ARP5L_HUMAN Actin-related protein 2/3 complex subunit 5-like protein OS=Homo sapiens OX=9606 GN=ARPC5L PE=1 SV=1	3	7.0608e-05	7.84236e-05	0.385691	1	0.900342	-0.151456
ARPP19	P56211	sp|P56211|ARP19_HUMAN cAMP-regulated phosphoprotein 19 OS=Homo sapiens OX=9606 GN=ARPP19 PE=1 SV=2	3	3.89836e-05	1.79544e-05	0.218377	1	2.17126	1.11853
ASAH1	Q13510	sp|Q13510|ASAH1_HUMAN Acid ceramidase OS=Homo sapiens OX=9606 GN=ASAH1 PE=1 SV=5	2	1.69061e-06	3.13694e-06	0.137773	1	0.538937	-0.891812
ASAP1	Q9ULH1	sp|Q9ULH1|ASAP1_HUMAN Arf-GAP with SH3 domain, ANK repeat and PH domain-containing protein 1 OS=Homo sapiens OX=9606 GN=ASAP1 PE=1 SV=4	11	8.49285e-06	7.3995e-06	0.474815	1	1.14776	0.198822
ASCC1	Q8N9N2	sp|Q8N9N2|ASCC1_HUMAN Activating signal cointegrator 1 complex subunit 1 OS=Homo sapiens OX=9606 GN=ASCC1 PE=1 SV=1	2	3.31659e-08	6.15394e-08	0.137773	1	0.538937	-0.891812
ASCC2	Q9H1I8	sp|Q9H1I8|ASCC2_HUMAN Activating signal cointegrator 1 complex subunit 2 OS=Homo sapiens OX=9606 GN=ASCC2 PE=1 SV=3	2	2.32708e-06	1.21787e-06	0.262894	1	1.91078	0.934159
ASCC3	Q8N3C0	sp|Q8N3C0|ASCC3_HUMAN Activating signal cointegrator 1 complex subunit 3 OS=Homo sapiens OX=9606 GN=ASCC3 PE=1 SV=3	4	5.61881e-07	5.40661e-07	0.473311	1	1.03925	0.0555384
ASF1B	Q9NVP2	sp|Q9NVP2|ASF1B_HUMAN Histone chaperone ASF1B OS=Homo sapiens OX=9606 GN=ASF1B PE=1 SV=1	1	7.48843e-06	9.04178e-06	0.336976	1	0.828203	-0.271944
ASH2L	Q9UBL3	sp|Q9UBL3|ASH2L_HUMAN Set1/Ash2 histone methyltransferase complex subunit ASH2 OS=Homo sapiens OX=9606 GN=ASH2L PE=1 SV=1	2	2.8641e-06	4.53934e-06	0.199137	1	0.63095	-0.664401
ASMTL	O95671	sp|O95671|ASML_HUMAN Probable bifunctional dTTP/UTP pyrophosphatase/methyltransferase protein OS=Homo sapiens OX=9606 GN=ASMTL PE=1 SV=3	3	1.02431e-06	6.15394e-08	0.00110461	3	16.6448	4.057
ASNA1	O43681	sp|O43681|ASNA_HUMAN ATPase ASNA1 OS=Homo sapiens OX=9606 GN=ASNA1 PE=1 SV=2	9	0.000161106	0.000128615	0.435984	1	1.25262	0.324951
ASPH	Q12797	sp|Q12797|ASPH_HUMAN Aspartyl/asparaginyl beta-hydroxylase OS=Homo sapiens OX=9606 GN=ASPH PE=1 SV=3	9	4.63427e-05	3.33992e-05	0.391347	1	1.38754	0.472528
ASPSCR1	Q9BZE9	sp|Q9BZE9|ASPC1_HUMAN Tether containing UBX domain for GLUT4 OS=Homo sapiens OX=9606 GN=ASPSCR1 PE=1 SV=1	2	2.84421e-06	6.15394e-08	1.30418e-05	4	46.2177	5.53037
ATAD1	Q8NBU5	sp|Q8NBU5|ATAD1_HUMAN ATPase family AAA domain-containing protein 1 OS=Homo sapiens OX=9606 GN=ATAD1 PE=1 SV=1	7	2.52598e-05	3.32147e-05	0.28991	1	0.7605	-0.39498
ATAD2	Q6PL18	sp|Q6PL18|ATAD2_HUMAN ATPase family AAA domain-containing protein 2 OS=Homo sapiens OX=9606 GN=ATAD2 PE=1 SV=1	11	6.03649e-06	7.787e-06	0.300206	1	0.775201	-0.367358
ATAD3A	Q9NVI7	sp|Q9NVI7|ATD3A_HUMAN ATPase family AAA domain-containing protein 3A OS=Homo sapiens OX=9606 GN=ATAD3A PE=1 SV=2	11	0.000194918	0.000225122	0.362615	1	0.865833	-0.207839
ATAD3B	Q5T9A4	sp|Q5T9A4|ATD3B_HUMAN ATPase family AAA domain-containing protein 3B OS=Homo sapiens OX=9606 GN=ATAD3B PE=1 SV=1	3	1.22321e-05	5.44352e-06	0.207203	1	2.24709	1.16806
ATG3	Q9NT62	sp|Q9NT62|ATG3_HUMAN Ubiquitin-like-conjugating enzyme ATG3 OS=Homo sapiens OX=9606 GN=ATG3 PE=1 SV=1	4	2.47625e-05	2.34348e-05	0.483625	1	1.05666	0.0795054
ATG9A	Q7Z3C6	sp|Q7Z3C6|ATG9A_HUMAN Autophagy-related protein 9A OS=Homo sapiens OX=9606 GN=ATG9A PE=1 SV=3	1	8.45307e-07	9.74298e-07	0.363812	1	0.867607	-0.204887
ATIC	P31939	sp|P31939|PUR9_HUMAN Bifunctional purine biosynthesis protein PURH OS=Homo sapiens OX=9606 GN=ATIC PE=1 SV=3	26	0.000144199	7.98998e-05	0.284181	1	1.80475	0.851802
ATL1	Q8WXF7	sp|Q8WXF7|ATLA1_HUMAN Atlastin-1 OS=Homo sapiens OX=9606 GN=ATL1 PE=1 SV=1	1	9.66634e-07	1.23079e-06	0.307313	1	0.785377	-0.348542
ATL2	Q8NHH9	sp|Q8NHH9|ATLA2_HUMAN Atlastin-2 OS=Homo sapiens OX=9606 GN=ATL2 PE=1 SV=2	9	4.84311e-05	3.94886e-05	0.445317	1	1.22646	0.294499
ATL3	Q6DD88	sp|Q6DD88|ATLA3_HUMAN Atlastin-3 OS=Homo sapiens OX=9606 GN=ATL3 PE=1 SV=1	21	0.000551936	0.000651377	0.350069	1	0.847337	-0.238992
ATOX1	O00244	sp|O00244|ATOX1_HUMAN Copper transport protein ATOX1 OS=Homo sapiens OX=9606 GN=ATOX1 PE=1 SV=1	3	0.000203868	6.15394e-08	1.19671e-19	4	3312.81	11.6938
ATP11C	Q8NB49	sp|Q8NB49|AT11C_HUMAN Phospholipid-transporting ATPase IG OS=Homo sapiens OX=9606 GN=ATP11C PE=1 SV=3	1	5.95693e-07	6.51377e-07	0.395033	1	0.914513	-0.128924
ATP12A	P54707	sp|P54707|AT12A_HUMAN Potassium-transporting ATPase alpha chain 2 OS=Homo sapiens OX=9606 GN=ATP12A PE=1 SV=3	1	1.32266e-05	7.65783e-06	0.301102	1	1.7272	0.788431
ATP13A1	Q9HD20	sp|Q9HD20|AT131_HUMAN Manganese-transporting ATPase 13A1 OS=Homo sapiens OX=9606 GN=ATP13A1 PE=1 SV=2	17	1.18343e-05	9.72452e-06	0.448765	1	1.21695	0.283275
ATP13A3	Q9H7F0	sp|Q9H7F0|AT133_HUMAN Probable cation-transporting ATPase 13A3 OS=Homo sapiens OX=9606 GN=ATP13A3 PE=1 SV=4	7	2.70498e-06	2.47265e-06	0.496265	1	1.09396	0.129562
ATP1A1	P05023	sp|P05023|AT1A1_HUMAN Sodium/potassium-transporting ATPase subunit alpha-1 OS=Homo sapiens OX=9606 GN=ATP1A1 PE=1 SV=1	41	0.000796578	0.000920785	0.362125	1	0.865107	-0.209049
ATP1B1	P05026	sp|P05026|AT1B1_HUMAN Sodium/potassium-transporting ATPase subunit beta-1 OS=Homo sapiens OX=9606 GN=ATP1B1 PE=1 SV=1	7	0.000200885	0.00028417	0.25222	1	0.706917	-0.500387
ATP1B3	P54709	sp|P54709|AT1B3_HUMAN Sodium/potassium-transporting ATPase subunit beta-3 OS=Homo sapiens OX=9606 GN=ATP1B3 PE=1 SV=1	8	0.000400775	0.000369052	0.499548	1	1.08596	0.118968
ATP2A2	P16615	sp|P16615|AT2A2_HUMAN Sarcoplasmic/endoplasmic reticulum calcium ATPase 2 OS=Homo sapiens OX=9606 GN=ATP2A2 PE=1 SV=1	34	0.000502212	0.000514828	0.43423	1	0.975495	-0.0357936
ATP2B1	P20020	sp|P20020|AT2B1_HUMAN Plasma membrane calcium-transporting ATPase 1 OS=Homo sapiens OX=9606 GN=ATP2B1 PE=1 SV=4	9	3.33151e-05	1.29906e-05	0.167455	1	2.56454	1.3587
ATP2B4	P23634	sp|P23634|AT2B4_HUMAN Plasma membrane calcium-transporting ATPase 4 OS=Homo sapiens OX=9606 GN=ATP2B4 PE=1 SV=2	16	0.000108398	9.96441e-05	0.498768	1	1.08785	0.121485
ATP2C1	P98194	sp|P98194|AT2C1_HUMAN Calcium-transporting ATPase type 2C member 1 OS=Homo sapiens OX=9606 GN=ATP2C1 PE=1 SV=3	7	3.31659e-08	1.31198e-05	1.73207e-21	4	0.00252792	-8.62783
ATP5F1A	P25705	sp|P25705|ATPA_HUMAN ATP synthase subunit alpha, mitochondrial OS=Homo sapiens OX=9606 GN=ATP5F1A PE=1 SV=1	29	0.00126299	0.001598	0.310784	1	0.790358	-0.339422
ATP5F1B	P06576	sp|P06576|ATPB_HUMAN ATP synthase subunit beta, mitochondrial OS=Homo sapiens OX=9606 GN=ATP5F1B PE=1 SV=3	24	0.00203868	0.00262027	0.302192	1	0.778043	-0.362079
ATP5F1C	P36542	sp|P36542|ATPG_HUMAN ATP synthase subunit gamma, mitochondrial OS=Homo sapiens OX=9606 GN=ATP5F1C PE=1 SV=1	11	0.000294366	0.000441017	0.224521	1	0.66747	-0.583225
ATP5F1D	P30049	sp|P30049|ATPD_HUMAN ATP synthase subunit delta, mitochondrial OS=Homo sapiens OX=9606 GN=ATP5F1D PE=1 SV=2	4	0.000484311	0.000845129	0.159943	1	0.573062	-0.803238
ATP5F1EP2	Q5VTU8	sp|Q5VTU8|AT5EL_HUMAN ATP synthase subunit epsilon-like protein, mitochondrial OS=Homo sapiens OX=9606 GN=ATP5F1EP2 PE=1 SV=1;sp|P56381|ATP5E_HUMAN ATP synthase subunit epsilon, mitochondrial OS=Homo sapiens OX=9606 GN=ATP5F1E PE=1 SV=2	2	0.000109393	0.000141162	0.300025	1	0.774942	-0.36784
ATP5MD	Q96IX5	sp|Q96IX5|ATPMD_HUMAN ATP synthase membrane subunit DAPIT, mitochondrial OS=Homo sapiens OX=9606 GN=ATP5MD PE=1 SV=1	2	0.000447516	0.000575721	0.301682	1	0.777313	-0.363433
ATP5ME	P56385	sp|P56385|ATP5I_HUMAN ATP synthase subunit e, mitochondrial OS=Homo sapiens OX=9606 GN=ATP5ME PE=1 SV=2	5	0.00047735	0.000549888	0.364135	1	0.868086	-0.20409
ATP5MF	P56134	sp|P56134|ATPK_HUMAN ATP synthase subunit f, mitochondrial OS=Homo sapiens OX=9606 GN=ATP5MF PE=1 SV=3	3	0.000450499	0.000629234	0.258578	1	0.715948	-0.482073
ATP5MG	O75964	sp|O75964|ATP5L_HUMAN ATP synthase subunit g, mitochondrial OS=Homo sapiens OX=9606 GN=ATP5MG PE=1 SV=3	4	0.000235692	0.00038566	0.185546	1	0.611139	-0.710428
ATP5MPL	P56378	sp|P56378|ATP68_HUMAN ATP synthase subunit ATP5MPL, mitochondrial OS=Homo sapiens OX=9606 GN=ATP5MPL PE=1 SV=1	3	3.62985e-05	1.13853e-05	0.113476	1	3.1882	1.67274
ATP5PB	P24539	sp|P24539|AT5F1_HUMAN ATP synthase F(0) complex subunit B1, mitochondrial OS=Homo sapiens OX=9606 GN=ATP5PB PE=1 SV=2	9	0.000271493	0.000228812	0.460012	1	1.18653	0.246749
ATP5PD	O75947	sp|O75947|ATP5H_HUMAN ATP synthase subunit d, mitochondrial OS=Homo sapiens OX=9606 GN=ATP5PD PE=1 SV=3	9	0.000415692	0.000417029	0.447511	1	0.996795	-0.00463165
ATP5PF	P18859	sp|P18859|ATP5J_HUMAN ATP synthase-coupling factor 6, mitochondrial OS=Homo sapiens OX=9606 GN=ATP5PF PE=1 SV=1	4	0.000467405	0.000662449	0.251273	1	0.705572	-0.503135
ATP5PO	P48047	sp|P48047|ATPO_HUMAN ATP synthase subunit O, mitochondrial OS=Homo sapiens OX=9606 GN=ATP5PO PE=1 SV=1	8	0.000466411	0.000372743	0.436452	1	1.25129	0.323421
ATP6AP1	Q15904	sp|Q15904|VAS1_HUMAN V-type proton ATPase subunit S1 OS=Homo sapiens OX=9606 GN=ATP6AP1 PE=1 SV=2	5	1.621e-05	1.99288e-05	0.32677	1	0.813395	-0.297971
ATP6AP2	O75787	sp|O75787|RENR_HUMAN Renin receptor OS=Homo sapiens OX=9606 GN=ATP6AP2 PE=1 SV=2	3	2.46631e-06	2.06669e-05	0.000290696	4	0.119336	-3.0669
ATP6V0A1	Q93050	sp|Q93050|VPP1_HUMAN V-type proton ATPase 116 kDa subunit a isoform 1 OS=Homo sapiens OX=9606 GN=ATP6V0A1 PE=1 SV=3	3	3.31659e-08	6.15394e-08	0.137773	1	0.538937	-0.891812
ATP6V0C	P27449	sp|P27449|VATL_HUMAN V-type proton ATPase 16 kDa proteolipid subunit OS=Homo sapiens OX=9606 GN=ATP6V0C PE=1 SV=1	2	3.31659e-08	4.35482e-05	5.37131e-30	4	0.000761591	-10.3587
ATP6V0D1	P61421	sp|P61421|VA0D1_HUMAN V-type proton ATPase subunit d 1 OS=Homo sapiens OX=9606 GN=ATP6V0D1 PE=1 SV=1	4	4.22654e-06	6.15394e-08	1.66639e-06	4	68.6801	6.10182
ATP6V1A	P38606	sp|P38606|VATA_HUMAN V-type proton ATPase catalytic subunit A OS=Homo sapiens OX=9606 GN=ATP6V1A PE=1 SV=2	11	1.49172e-05	2.12205e-05	0.249435	1	0.702961	-0.508483
ATP6V1B2	P21281	sp|P21281|VATB2_HUMAN V-type proton ATPase subunit B, brain isoform OS=Homo sapiens OX=9606 GN=ATP6V1B2 PE=1 SV=3	10	3.25195e-05	2.38039e-05	0.398052	1	1.36614	0.450108
ATP6V1C1	P21283	sp|P21283|VATC1_HUMAN V-type proton ATPase subunit C 1 OS=Homo sapiens OX=9606 GN=ATP6V1C1 PE=1 SV=4	9	2.85416e-05	1.19757e-05	0.188858	1	2.38328	1.25295
ATP6V1D	Q9Y5K8	sp|Q9Y5K8|VATD_HUMAN V-type proton ATPase subunit D OS=Homo sapiens OX=9606 GN=ATP6V1D PE=1 SV=1	2	9.46744e-06	2.78634e-06	0.100341	1	3.3978	1.7646
ATP6V1E1	P36543	sp|P36543|VATE1_HUMAN V-type proton ATPase subunit E 1 OS=Homo sapiens OX=9606 GN=ATP6V1E1 PE=1 SV=1	4	2.1083e-05	1.52603e-05	0.393208	1	1.38156	0.466293
ATP6V1F	Q16864	sp|Q16864|VATF_HUMAN V-type proton ATPase subunit F OS=Homo sapiens OX=9606 GN=ATP6V1F PE=1 SV=2	3	9.86523e-06	4.09648e-05	0.00949158	3	0.240822	-2.05396
ATP6V1G1	O75348	sp|O75348|VATG1_HUMAN V-type proton ATPase subunit G 1 OS=Homo sapiens OX=9606 GN=ATP6V1G1 PE=1 SV=3;sp|O95670|VATG2_HUMAN V-type proton ATPase subunit G 2 OS=Homo sapiens OX=9606 GN=ATP6V1G2 PE=1 SV=1	2	6.66301e-05	2.47265e-05	0.153923	1	2.69468	1.43012
ATP6V1H	Q9UI12	sp|Q9UI12|VATH_HUMAN V-type proton ATPase subunit H OS=Homo sapiens OX=9606 GN=ATP6V1H PE=1 SV=1	3	5.41991e-06	4.66851e-06	0.469718	1	1.16095	0.215307
ATXN10	Q9UBB4	sp|Q9UBB4|ATX10_HUMAN Ataxin-10 OS=Homo sapiens OX=9606 GN=ATXN10 PE=1 SV=1	9	1.55139e-05	2.98932e-05	0.125236	1	0.518976	-0.94626
ATXN2	Q99700	sp|Q99700|ATX2_HUMAN Ataxin-2 OS=Homo sapiens OX=9606 GN=ATXN2 PE=1 SV=2	6	9.18899e-06	3.37683e-06	0.151335	1	2.72119	1.44424
ATXN2L	Q8WWM7	sp|Q8WWM7|ATX2L_HUMAN Ataxin-2-like protein OS=Homo sapiens OX=9606 GN=ATXN2L PE=1 SV=2	8	1.05415e-05	6.12627e-06	0.302574	1	1.7207	0.782997
AUH	Q13825	sp|Q13825|AUHM_HUMAN Methylglutaconyl-CoA hydratase, mitochondrial OS=Homo sapiens OX=9606 GN=AUH PE=1 SV=1	1	3.31659e-08	6.15394e-08	0.137773	1	0.538937	-0.891812
AUP1	Q9Y679	sp|Q9Y679|AUP1_HUMAN Ancient ubiquitous protein 1 OS=Homo sapiens OX=9606 GN=AUP1 PE=1 SV=2	2	1.60111e-05	1.46698e-05	0.4973	1	1.09143	0.126222
AURKA	O14965	sp|O14965|AURKA_HUMAN Aurora kinase A OS=Homo sapiens OX=9606 GN=AURKA PE=1 SV=2	1	3.31659e-08	6.15394e-08	0.137773	1	0.538937	-0.891812
AURKB	Q96GD4	sp|Q96GD4|AURKB_HUMAN Aurora kinase B OS=Homo sapiens OX=9606 GN=AURKB PE=1 SV=3	3	3.31659e-08	3.43219e-06	9.35026e-14	4	0.0096632	-6.69328
AXL	P30530	sp|P30530|UFO_HUMAN Tyrosine-protein kinase receptor UFO OS=Homo sapiens OX=9606 GN=AXL PE=1 SV=4	16	4.66411e-05	6.31079e-05	0.274853	1	0.739068	-0.43622
B2M	P61769	sp|P61769|B2MG_HUMAN Beta-2-microglobulin OS=Homo sapiens OX=9606 GN=B2M PE=1 SV=1	3	0.00236686	0.00156109	0.353767	1	1.51616	0.60042
B3GAT3	O94766	sp|O94766|B3GA3_HUMAN Galactosylgalactosylxylosylprotein 3-beta-glucuronosyltransferase 3 OS=Homo sapiens OX=9606 GN=B3GAT3 PE=1 SV=2	4	2.07846e-05	1.88217e-05	0.492063	1	1.10429	0.143122
B4GALT1	P15291	sp|P15291|B4GT1_HUMAN Beta-1,4-galactosyltransferase 1 OS=Homo sapiens OX=9606 GN=B4GALT1 PE=1 SV=5	1	3.31659e-08	6.15394e-08	0.137773	1	0.538937	-0.891812
B4GALT5	O43286	sp|O43286|B4GT5_HUMAN Beta-1,4-galactosyltransferase 5 OS=Homo sapiens OX=9606 GN=B4GALT5 PE=1 SV=1	1	4.88289e-06	6.75365e-06	0.263543	1	0.723	-0.467932
B4GALT7	Q9UBV7	sp|Q9UBV7|B4GT7_HUMAN Beta-1,4-galactosyltransferase 7 OS=Homo sapiens OX=9606 GN=B4GALT7 PE=1 SV=1	1	1.55139e-06	1.82496e-06	0.351946	1	0.850093	-0.234308
BABAM1	Q9NWV8	sp|Q9NWV8|BABA1_HUMAN BRISC and BRCA1-A complex member 1 OS=Homo sapiens OX=9606 GN=BABAM1 PE=1 SV=1	1	3.29173e-06	6.15394e-08	6.24099e-06	4	53.4897	5.74119
BAD	Q92934	sp|Q92934|BAD_HUMAN Bcl2-associated agonist of cell death OS=Homo sapiens OX=9606 GN=BAD PE=1 SV=3	4	8.25418e-06	3.5429e-05	0.00825428	3	0.232978	-2.10173
BAG2	O95816	sp|O95816|BAG2_HUMAN BAG family molecular chaperone regulator 2 OS=Homo sapiens OX=9606 GN=BAG2 PE=1 SV=1	11	0.000194918	0.000212205	0.397669	1	0.918536	-0.122592
BAG3	O95817	sp|O95817|BAG3_HUMAN BAG family molecular chaperone regulator 3 OS=Homo sapiens OX=9606 GN=BAG3 PE=1 SV=3	15	4.00775e-05	3.08159e-05	0.419473	1	1.30055	0.37912
BAG5	Q9UL15	sp|Q9UL15|BAG5_HUMAN BAG family molecular chaperone regulator 5 OS=Homo sapiens OX=9606 GN=BAG5 PE=1 SV=1	2	1.45194e-06	1.80467e-06	0.320645	1	0.804548	-0.31375
BAG6	P46379	sp|P46379|BAG6_HUMAN Large proline-rich protein BAG6 OS=Homo sapiens OX=9606 GN=BAG6 PE=1 SV=2	13	2.01879e-05	2.19586e-05	0.39821	1	0.919363	-0.121294
BAIAP2	Q9UQB8	sp|Q9UQB8|BAIP2_HUMAN Brain-specific angiogenesis inhibitor 1-associated protein 2 OS=Homo sapiens OX=9606 GN=BAIAP2 PE=1 SV=1	8	1.55139e-05	1.51127e-05	0.465688	1	1.02655	0.0377989
BAIAP2L1	Q9UHR4	sp|Q9UHR4|BI2L1_HUMAN Brain-specific angiogenesis inhibitor 1-associated protein 2-like protein 1 OS=Homo sapiens OX=9606 GN=BAIAP2L1 PE=1 SV=2	3	2.40664e-06	1.79544e-06	0.406295	1	1.34042	0.422684
BAK1	Q16611	sp|Q16611|BAK_HUMAN Bcl-2 homologous antagonist/killer OS=Homo sapiens OX=9606 GN=BAK1 PE=1 SV=1	4	2.22763e-05	5.35126e-05	0.0677375	1	0.416282	-1.26437
BANF1	O75531	sp|O75531|BAF_HUMAN Barrier-to-autointegration factor OS=Homo sapiens OX=9606 GN=BANF1 PE=1 SV=1	6	0.00329173	0.00407803	0.322474	1	0.807186	-0.309027
BAP18	Q8IXM2	sp|Q8IXM2|BAP18_HUMAN Chromatin complexes subunit BAP18 OS=Homo sapiens OX=9606 GN=BAP18 PE=1 SV=1	4	5.37019e-05	3.39528e-05	0.336302	1	1.58166	0.661442
BASP1	P80723	sp|P80723|BASP1_HUMAN Brain acid soluble protein 1 OS=Homo sapiens OX=9606 GN=BASP1 PE=1 SV=2	12	0.000737903	0.0006034	0.446602	1	1.22291	0.290317
BAX	Q07812	sp|Q07812|BAX_HUMAN Apoptosis regulator BAX OS=Homo sapiens OX=9606 GN=BAX PE=1 SV=1	5	7.2597e-05	4.31791e-05	0.311696	1	1.6813	0.749576
BAZ1A	Q9NRL2	sp|Q9NRL2|BAZ1A_HUMAN Bromodomain adjacent to zinc finger domain protein 1A OS=Homo sapiens OX=9606 GN=BAZ1A PE=1 SV=2	4	9.21882e-07	6.15394e-08	0.00162802	3	14.9803	3.905
BAZ1B	Q9UIG0	sp|Q9UIG0|BAZ1B_HUMAN Tyrosine-protein kinase BAZ1B OS=Homo sapiens OX=9606 GN=BAZ1B PE=1 SV=2	24	1.17349e-05	6.93818e-06	0.309339	1	1.69134	0.75817
BCAP29	Q9UHQ4	sp|Q9UHQ4|BAP29_HUMAN B-cell receptor-associated protein 29 OS=Homo sapiens OX=9606 GN=BCAP29 PE=1 SV=2	6	1.47183e-05	1.82312e-05	0.322563	1	0.807314	-0.308798
BCAP31	P51572	sp|P51572|BAP31_HUMAN B-cell receptor-associated protein 31 OS=Homo sapiens OX=9606 GN=BCAP31 PE=1 SV=3	12	0.000965639	0.000859892	0.484563	1	1.12298	0.16733
BCAS2	O75934	sp|O75934|SPF27_HUMAN Pre-mRNA-splicing factor SPF27 OS=Homo sapiens OX=9606 GN=BCAS2 PE=1 SV=1	10	0.00010442	7.787e-05	0.40612	1	1.34096	0.423263
BCAT1	P54687	sp|P54687|BCAT1_HUMAN Branched-chain-amino-acid aminotransferase, cytosolic OS=Homo sapiens OX=9606 GN=BCAT1 PE=1 SV=3	1	2.67515e-06	2.97087e-06	0.38577	1	0.90046	-0.151266
BCAT2	O15382	sp|O15382|BCAT2_HUMAN Branched-chain-amino-acid aminotransferase, mitochondrial OS=Homo sapiens OX=9606 GN=BCAT2 PE=1 SV=2	13	7.05086e-05	9.2263e-05	0.292513	1	0.764212	-0.387954
BCCIP	Q9P287	sp|Q9P287|BCCIP_HUMAN BRCA2 and CDKN1A-interacting protein OS=Homo sapiens OX=9606 GN=BCCIP PE=1 SV=1	10	7.04091e-05	3.52445e-05	0.246884	1	1.99773	0.998365
BCKDHA	P12694	sp|P12694|ODBA_HUMAN 2-oxoisovalerate dehydrogenase subunit alpha, mitochondrial OS=Homo sapiens OX=9606 GN=BCKDHA PE=1 SV=2	3	1.91934e-06	2.56491e-06	0.28135	1	0.748308	-0.418296
BCKDK	O14874	sp|O14874|BCKD_HUMAN [3-methyl-2-oxobutanoate dehydrogenase [lipoamide]] kinase, mitochondrial OS=Homo sapiens OX=9606 GN=BCKDK PE=1 SV=2	2	3.31659e-08	3.22921e-06	1.89634e-13	4	0.0102706	-6.60534
BCL2L1	Q07817	sp|Q07817|B2CL1_HUMAN Bcl-2-like protein 1 OS=Homo sapiens OX=9606 GN=BCL2L1 PE=1 SV=1	3	3.21217e-05	2.17741e-05	0.365237	1	1.47523	0.560935
BCL2L12	Q9HB09	sp|Q9HB09|B2L12_HUMAN Bcl-2-like protein 12 OS=Homo sapiens OX=9606 GN=BCL2L12 PE=1 SV=1	1	2.69504e-06	2.74944e-06	0.437191	1	0.980214	-0.0288313
BCL2L13	Q9BXK5	sp|Q9BXK5|B2L13_HUMAN Bcl-2-like protein 13 OS=Homo sapiens OX=9606 GN=BCL2L13 PE=1 SV=1	1	4.11714e-06	6.15394e-08	1.92078e-06	4	66.9025	6.06399
BCLAF1	Q9NYF8	sp|Q9NYF8|BCLF1_HUMAN Bcl-2-associated transcription factor 1 OS=Homo sapiens OX=9606 GN=BCLAF1 PE=1 SV=2	20	4.88289e-05	5.60959e-05	0.365731	1	0.870454	-0.20016
BCS1L	Q9Y276	sp|Q9Y276|BCS1_HUMAN Mitochondrial chaperone BCS1 OS=Homo sapiens OX=9606 GN=BCS1L PE=1 SV=1	5	3.56024e-06	4.76077e-06	0.281012	1	0.747827	-0.419223
BDH1	Q02338	sp|Q02338|BDH_HUMAN D-beta-hydroxybutyrate dehydrogenase, mitochondrial OS=Homo sapiens OX=9606 GN=BDH1 PE=1 SV=3	9	3.55029e-05	2.19586e-05	0.327361	1	1.61681	0.693151
BET1	O15155	sp|O15155|BET1_HUMAN BET1 homolog OS=Homo sapiens OX=9606 GN=BET1 PE=1 SV=1	2	6.29505e-05	4.37327e-05	0.375633	1	1.43944	0.525507
BET1L	Q9NYM9	sp|Q9NYM9|BET1L_HUMAN BET1-like protein OS=Homo sapiens OX=9606 GN=BET1L PE=1 SV=1	1	1.10387e-05	1.17728e-05	0.4101	1	0.937649	-0.0928805
BICD2	Q8TD16	sp|Q8TD16|BICD2_HUMAN Protein bicaudal D homolog 2 OS=Homo sapiens OX=9606 GN=BICD2 PE=1 SV=1	3	8.66191e-07	3.10004e-06	0.0172487	2	0.279413	-1.83953
BID	P55957	sp|P55957|BID_HUMAN BH3-interacting domain death agonist OS=Homo sapiens OX=9606 GN=BID PE=1 SV=1	4	8.74147e-05	4.15184e-05	0.228684	1	2.10545	1.07413
BIN1	O00499	sp|O00499|BIN1_HUMAN Myc box-dependent-interacting protein 1 OS=Homo sapiens OX=9606 GN=BIN1 PE=1 SV=1	8	2.74476e-05	2.23277e-05	0.444289	1	1.22931	0.297849
BIN3	Q9NQY0	sp|Q9NQY0|BIN3_HUMAN Bridging integrator 3 OS=Homo sapiens OX=9606 GN=BIN3 PE=1 SV=1	2	8.90059e-06	6.15394e-08	2.08049e-08	4	144.632	7.17625
BIRC2	Q13490	sp|Q13490|BIRC2_HUMAN Baculoviral IAP repeat-containing protein 2 OS=Homo sapiens OX=9606 GN=BIRC2 PE=1 SV=2	3	2.46631e-06	6.15394e-08	2.61141e-05	4	40.0769	5.3247
BLMH	Q13867	sp|Q13867|BLMH_HUMAN Bleomycin hydrolase OS=Homo sapiens OX=9606 GN=BLMH PE=1 SV=1	6	1.8199e-05	1.13484e-05	0.330671	1	1.60367	0.681374
BLVRA	P53004	sp|P53004|BIEA_HUMAN Biliverdin reductase A OS=Homo sapiens OX=9606 GN=BLVRA PE=1 SV=2	6	1.75028e-05	3.94886e-05	0.0814978	1	0.443238	-1.17385
BLVRB	P30043	sp|P30043|BLVRB_HUMAN Flavin reductase (NADPH) OS=Homo sapiens OX=9606 GN=BLVRB PE=1 SV=3	6	0.000116354	0.000101674	0.47613	1	1.14438	0.194572
BMP2K	Q9NSY1	sp|Q9NSY1|BMP2K_HUMAN BMP-2-inducible protein kinase OS=Homo sapiens OX=9606 GN=BMP2K PE=1 SV=2	1	1.21326e-06	1.31752e-06	0.399197	1	0.920873	-0.118927
BMS1	Q14692	sp|Q14692|BMS1_HUMAN Ribosome biogenesis protein BMS1 homolog OS=Homo sapiens OX=9606 GN=BMS1 PE=1 SV=1	12	1.10387e-05	4.76077e-06	0.197297	1	2.31868	1.2133
BNIP1	Q12981	sp|Q12981|SEC20_HUMAN Vesicle transport protein SEC20 OS=Homo sapiens OX=9606 GN=BNIP1 PE=1 SV=3	3	3.31659e-08	4.72387e-06	1.98894e-15	4	0.00702092	-7.15413
BOLA2	Q9H3K6	sp|Q9H3K6|BOLA2_HUMAN BolA-like protein 2 OS=Homo sapiens OX=9606 GN=BOLA2 PE=1 SV=1	4	8.75142e-05	1.50204e-05	0.0297806	2	5.82634	2.54259
BOP1	Q14137	sp|Q14137|BOP1_HUMAN Ribosome biogenesis protein BOP1 OS=Homo sapiens OX=9606 GN=BOP1 PE=1 SV=2	19	6.25527e-05	4.87149e-05	0.42507	1	1.28406	0.36071
BPHL	Q86WA6	sp|Q86WA6|BPHL_HUMAN Valacyclovir hydrolase OS=Homo sapiens OX=9606 GN=BPHL PE=1 SV=1	4	2.14807e-06	6.15394e-08	5.00016e-05	4	34.9057	5.12539
BPNT1	O95861	sp|O95861|BPNT1_HUMAN 3(2),5-bisphosphate nucleotidase 1 OS=Homo sapiens OX=9606 GN=BPNT1 PE=1 SV=1	4	1.13371e-05	7.45485e-06	0.352504	1	1.52076	0.604795
BPTF	Q12830	sp|Q12830|BPTF_HUMAN Nucleosome-remodeling factor subunit BPTF OS=Homo sapiens OX=9606 GN=BPTF PE=1 SV=3	3	2.82432e-06	4.9453e-07	0.0313269	2	5.71112	2.51377
BRD4	O60885	sp|O60885|BRD4_HUMAN Bromodomain-containing protein 4 OS=Homo sapiens OX=9606 GN=BRD4 PE=1 SV=2	7	7.64754e-06	2.34348e-06	0.108536	1	3.26333	1.70634
BRI3BP	Q8WY22	sp|Q8WY22|BRI3B_HUMAN BRI3-binding protein OS=Homo sapiens OX=9606 GN=BRI3BP PE=1 SV=1	1	1.08398e-05	1.18466e-05	0.395364	1	0.915017	-0.128129
BRIX1	Q8TDN6	sp|Q8TDN6|BRX1_HUMAN Ribosome biogenesis protein BRX1 homolog OS=Homo sapiens OX=9606 GN=BRIX1 PE=1 SV=2	14	0.000304311	0.000219586	0.391875	1	1.38584	0.470758
BRK1	Q8WUW1	sp|Q8WUW1|BRK1_HUMAN Protein BRICK1 OS=Homo sapiens OX=9606 GN=BRK1 PE=1 SV=1	3	4.66411e-05	1.90062e-05	0.180126	1	2.45399	1.29513
BROX	Q5VW32	sp|Q5VW32|BROX_HUMAN BRO1 domain-containing protein BROX OS=Homo sapiens OX=9606 GN=BROX PE=1 SV=1	2	8.40335e-06	5.07447e-06	0.317729	1	1.65601	0.727708
BSCL2	Q96G97	sp|Q96G97|BSCL2_HUMAN Seipin OS=Homo sapiens OX=9606 GN=BSCL2 PE=1 SV=3	1	2.22763e-06	6.15394e-08	4.22359e-05	4	36.1985	5.17786
BSG	P35613	sp|P35613|BASI_HUMAN Basigin OS=Homo sapiens OX=9606 GN=BSG PE=1 SV=2	9	0.00097459	0.00114591	0.35222	1	0.850496	-0.233623
BST2	Q10589	sp|Q10589|BST2_HUMAN Bone marrow stromal antigen 2 OS=Homo sapiens OX=9606 GN=BST2 PE=1 SV=1	4	5.73814e-05	4.41017e-05	0.419282	1	1.30112	0.379749
BTAF1	O14981	sp|O14981|BTAF1_HUMAN TATA-binding protein-associated factor 172 OS=Homo sapiens OX=9606 GN=BTAF1 PE=1 SV=2	7	2.12819e-06	2.74944e-06	0.299397	1	0.774044	-0.369513
BTF3	P20290	sp|P20290|BTF3_HUMAN Transcription factor BTF3 OS=Homo sapiens OX=9606 GN=BTF3 PE=1 SV=1	6	0.000326189	0.000370897	0.37178	1	0.879459	-0.185312
BTF3L4	Q96K17	sp|Q96K17|BT3L4_HUMAN Transcription factor BTF3 homolog 4 OS=Homo sapiens OX=9606 GN=BTF3L4 PE=1 SV=1	6	0.000350057	0.000396731	0.373718	1	0.882352	-0.180573
BTN2A1	Q7KYR7	sp|Q7KYR7|BT2A1_HUMAN Butyrophilin subfamily 2 member A1 OS=Homo sapiens OX=9606 GN=BTN2A1 PE=1 SV=3;sp|Q8WVV5|BT2A2_HUMAN Butyrophilin subfamily 2 member A2 OS=Homo sapiens OX=9606 GN=BTN2A2 PE=1 SV=2	2	1.80001e-06	2.08514e-06	0.360872	1	0.863253	-0.212145
BUB3	O43684	sp|O43684|BUB3_HUMAN Mitotic checkpoint protein BUB3 OS=Homo sapiens OX=9606 GN=BUB3 PE=1 SV=1	7	0.000146188	5.92329e-05	0.178453	1	2.46803	1.30336
BUD31	P41223	sp|P41223|BUD31_HUMAN Protein BUD31 homolog OS=Homo sapiens OX=9606 GN=BUD31 PE=1 SV=2	6	3.93814e-05	3.22921e-05	0.447825	1	1.21954	0.286334
BYSL	Q13895	sp|Q13895|BYST_HUMAN Bystin OS=Homo sapiens OX=9606 GN=BYSL PE=1 SV=3	12	4.79339e-05	1.58877e-05	0.125814	1	3.01704	1.59314
BZW1	Q7L1Q6	sp|Q7L1Q6|BZW1_HUMAN Basic leucine zipper and W2 domain-containing protein 1 OS=Homo sapiens OX=9606 GN=BZW1 PE=1 SV=1	16	8.61219e-05	0.000131936	0.214251	1	0.652754	-0.615388
BZW2	Q9Y6E2	sp|Q9Y6E2|BZW2_HUMAN Basic leucine zipper and W2 domain-containing protein 2 OS=Homo sapiens OX=9606 GN=BZW2 PE=1 SV=1	14	4.13703e-05	3.43219e-05	0.453012	1	1.20536	0.269469
C11orf54	Q9H0W9	sp|Q9H0W9|CK054_HUMAN Ester hydrolase C11orf54 OS=Homo sapiens OX=9606 GN=C11orf54 PE=1 SV=1	1	1.91934e-06	6.15394e-08	8.3477e-05	4	31.1889	4.96296
C11orf68	Q9H3H3	sp|Q9H3H3|CK068_HUMAN UPF0696 protein C11orf68 OS=Homo sapiens OX=9606 GN=C11orf68 PE=1 SV=3	6	2.99338e-05	3.00778e-05	0.446534	1	0.995215	-0.0069203
C11orf98	E9PRG8	sp|E9PRG8|CK098_HUMAN Uncharacterized protein C11orf98 OS=Homo sapiens OX=9606 GN=C11orf98 PE=4 SV=2	2	8.15473e-05	0.000110347	0.274812	1	0.73901	-0.436333
C12orf10	Q9HB07	sp|Q9HB07|MYG1_HUMAN UPF0160 protein MYG1, mitochondrial OS=Homo sapiens OX=9606 GN=C12orf10 PE=1 SV=2	4	9.66634e-06	3.8935e-06	0.176726	1	2.48269	1.3119
C12orf29	Q8N999	sp|Q8N999|CL029_HUMAN Uncharacterized protein C12orf29 OS=Homo sapiens OX=9606 GN=C12orf29 PE=1 SV=2	1	5.82765e-05	4.88994e-05	0.458055	1	1.19176	0.253096
C12orf57	Q99622	sp|Q99622|C10_HUMAN Protein C10 OS=Homo sapiens OX=9606 GN=C12orf57 PE=1 SV=1	2	1.26299e-05	1.47067e-05	0.357846	1	0.858783	-0.219635
C16orf58	Q96GQ5	sp|Q96GQ5|RUS1_HUMAN RUS1 family protein C16orf58 OS=Homo sapiens OX=9606 GN=C16orf58 PE=1 SV=2	2	3.31659e-08	6.15394e-08	0.137773	1	0.538937	-0.891812
C19orf25	Q9UFG5	sp|Q9UFG5|CS025_HUMAN UPF0449 protein C19orf25 OS=Homo sapiens OX=9606 GN=C19orf25 PE=1 SV=2	2	1.3326e-05	6.15394e-08	1.45813e-09	4	216.544	7.75852
C1GALT1C1	Q96EU7	sp|Q96EU7|C1GLC_HUMAN C1GALT1-specific chaperone 1 OS=Homo sapiens OX=9606 GN=C1GALT1C1 PE=1 SV=1	1	1.98896e-06	3.11849e-06	0.203866	1	0.637795	-0.648835
C1QBP	Q07021	sp|Q07021|C1QBP_HUMAN Complement component 1 Q subcomponent-binding protein, mitochondrial OS=Homo sapiens OX=9606 GN=C1QBP PE=1 SV=1	9	0.00139227	0.00195598	0.25566	1	0.711803	-0.490449
C20orf27	Q9GZN8	sp|Q9GZN8|CT027_HUMAN UPF0687 protein C20orf27 OS=Homo sapiens OX=9606 GN=C20orf27 PE=1 SV=3	5	2.76465e-05	3.13694e-05	0.373027	1	0.88132	-0.182262
C3	P01024	sp|P01024|CO3_HUMAN Complement C3 OS=Homo sapiens OX=9606 GN=C3 PE=1 SV=2	1	2.18785e-06	3.17385e-06	0.239855	1	0.689338	-0.536717
C6orf120	Q7Z4R8	sp|Q7Z4R8|CF120_HUMAN UPF0669 protein C6orf120 OS=Homo sapiens OX=9606 GN=C6orf120 PE=1 SV=1	2	0.000129282	6.15394e-08	1.09676e-17	4	2100.8	11.0367
C7orf50	Q9BRJ6	sp|Q9BRJ6|CG050_HUMAN Uncharacterized protein C7orf50 OS=Homo sapiens OX=9606 GN=C7orf50 PE=1 SV=1	5	4.47516e-05	2.19586e-05	0.239878	1	2.038	1.02715
C8orf33	Q9H7E9	sp|Q9H7E9|CH033_HUMAN UPF0488 protein C8orf33 OS=Homo sapiens OX=9606 GN=C8orf33 PE=1 SV=1	2	7.00113e-06	4.02267e-06	0.298131	1	1.74042	0.799435
C8orf82	Q6P1X6	sp|Q6P1X6|CH082_HUMAN UPF0598 protein C8orf82 OS=Homo sapiens OX=9606 GN=C8orf82 PE=1 SV=2	1	3.31659e-08	4.77923e-06	1.7204e-15	4	0.00693959	-7.17093
C9orf64	Q5T6V5	sp|Q5T6V5|QSPP_HUMAN Queuosine salvage protein OS=Homo sapiens OX=9606 GN=C9orf64 PE=1 SV=1	3	2.36686e-06	6.15394e-08	3.17657e-05	4	38.4609	5.26532
CA9	Q16790	sp|Q16790|CAH9_HUMAN Carbonic anhydrase 9 OS=Homo sapiens OX=9606 GN=CA9 PE=1 SV=2	1	3.65968e-06	6.15394e-08	3.59877e-06	4	59.4689	5.89406
CAB39	Q9Y376	sp|Q9Y376|CAB39_HUMAN Calcium-binding protein 39 OS=Homo sapiens OX=9606 GN=CAB39 PE=1 SV=1	6	1.63095e-05	5.77567e-06	0.141811	1	2.82382	1.49765
CACYBP	Q9HB71	sp|Q9HB71|CYBP_HUMAN Calcyclin-binding protein OS=Homo sapiens OX=9606 GN=CACYBP PE=1 SV=2	10	0.000487295	0.000345064	0.383788	1	1.41219	0.497932
CAD	P27708	sp|P27708|PYR1_HUMAN CAD protein OS=Homo sapiens OX=9606 GN=CAD PE=1 SV=3	60	9.1691e-05	7.91617e-05	0.470748	1	1.15827	0.211977
CALB2	P22676	sp|P22676|CALB2_HUMAN Calretinin OS=Homo sapiens OX=9606 GN=CALB2 PE=2 SV=2	1	2.92377e-06	6.15394e-08	1.137e-05	4	47.5105	5.57017
CALCOCO2	Q13137	sp|Q13137|CACO2_HUMAN Calcium-binding and coiled-coil domain-containing protein 2 OS=Homo sapiens OX=9606 GN=CALCOCO2 PE=1 SV=1	3	7.73705e-06	2.86015e-06	0.152898	1	2.70512	1.43569
CALD1	Q05682	sp|Q05682|CALD1_HUMAN Caldesmon OS=Homo sapiens OX=9606 GN=CALD1 PE=1 SV=3	9	4.49505e-05	3.78278e-05	0.459352	1	1.18829	0.248887
CALM3	P0DP25	sp|P0DP25|CALM3_HUMAN Calmodulin-3 OS=Homo sapiens OX=9606 GN=CALM3 PE=1 SV=1;sp|P0DP24|CALM2_HUMAN Calmodulin-2 OS=Homo sapiens OX=9606 GN=CALM2 PE=1 SV=1;sp|P0DP23|CALM1_HUMAN Calmodulin-1 OS=Homo sapiens OX=9606 GN=CALM1 PE=1 SV=1	12	0.0045746	0.00544352	0.345319	1	0.840376	-0.250893
CALR	P27797	sp|P27797|CALR_HUMAN Calreticulin OS=Homo sapiens OX=9606 GN=CALR PE=1 SV=1	23	0.00351051	0.0038566	0.392239	1	0.910262	-0.135647
CALU	O43852	sp|O43852|CALU_HUMAN Calumenin OS=Homo sapiens OX=9606 GN=CALU PE=1 SV=2	19	0.00152155	0.00202979	0.282266	1	0.749612	-0.415784
CAMK2D	Q13557	sp|Q13557|KCC2D_HUMAN Calcium/calmodulin-dependent protein kinase type II subunit delta OS=Homo sapiens OX=9606 GN=CAMK2D PE=1 SV=3	6	3.01327e-05	1.17728e-05	0.168005	1	2.55953	1.35588
CAND1	Q86VP6	sp|Q86VP6|CAND1_HUMAN Cullin-associated NEDD8-dissociated protein 1 OS=Homo sapiens OX=9606 GN=CAND1 PE=1 SV=2	26	6.9713e-05	4.22565e-05	0.319241	1	1.64976	0.722255
CANX	P27824	sp|P27824|CALX_HUMAN Calnexin OS=Homo sapiens OX=9606 GN=CANX PE=1 SV=2	30	0.00208841	0.00230658	0.389044	1	0.905414	-0.143351
CAP1	Q01518	sp|Q01518|CAP1_HUMAN Adenylyl cyclase-associated protein 1 OS=Homo sapiens OX=9606 GN=CAP1 PE=1 SV=5	21	0.000667295	0.00053328	0.436449	1	1.2513	0.323431
CAP2	P40123	sp|P40123|CAP2_HUMAN Adenylyl cyclase-associated protein 2 OS=Homo sapiens OX=9606 GN=CAP2 PE=1 SV=1	3	9.37794e-06	6.99354e-06	0.406125	1	1.34094	0.423248
CAPG	P40121	sp|P40121|CAPG_HUMAN Macrophage-capping protein OS=Homo sapiens OX=9606 GN=CAPG PE=1 SV=2	9	0.000299338	0.000265718	0.483153	1	1.12653	0.171883
CAPN1	P07384	sp|P07384|CAN1_HUMAN Calpain-1 catalytic subunit OS=Homo sapiens OX=9606 GN=CAPN1 PE=1 SV=1	26	0.000148177	0.000134889	0.494407	1	1.09852	0.135557
CAPN2	P17655	sp|P17655|CAN2_HUMAN Calpain-2 catalytic subunit OS=Homo sapiens OX=9606 GN=CAPN2 PE=1 SV=6	26	0.000476355	0.000369052	0.422787	1	1.29075	0.368214
CAPNS1	P04632	sp|P04632|CPNS1_HUMAN Calpain small subunit 1 OS=Homo sapiens OX=9606 GN=CAPNS1 PE=1 SV=1	8	0.000578787	0.000512983	0.48246	1	1.12828	0.174122
CAPRIN1	Q14444	sp|Q14444|CAPR1_HUMAN Caprin-1 OS=Homo sapiens OX=9606 GN=CAPRIN1 PE=1 SV=2	7	0.000117349	0.000137841	0.352789	1	0.851333	-0.232205
CAPZA1	P52907	sp|P52907|CAZA1_HUMAN F-actin-capping protein subunit alpha-1 OS=Homo sapiens OX=9606 GN=CAPZA1 PE=1 SV=3	10	0.000358012	0.000372743	0.424737	1	0.960482	-0.0581702
CAPZA2	P47755	sp|P47755|CAZA2_HUMAN F-actin-capping protein subunit alpha-2 OS=Homo sapiens OX=9606 GN=CAPZA2 PE=1 SV=3	12	0.000405747	0.000300778	0.403524	1	1.349	0.431885
CAPZB	P47756	sp|P47756|CAPZB_HUMAN F-actin-capping protein subunit beta OS=Homo sapiens OX=9606 GN=CAPZB PE=1 SV=4	13	0.000412709	0.000286015	0.374595	1	1.44296	0.529031
CARD19	Q96LW7	sp|Q96LW7|CAR19_HUMAN Caspase recruitment domain-containing protein 19 OS=Homo sapiens OX=9606 GN=CARD19 PE=1 SV=1	3	5.53925e-06	6.15394e-08	3.66667e-07	4	90.0113	6.49203
CARHSP1	Q9Y2V2	sp|Q9Y2V2|CHSP1_HUMAN Calcium-regulated heat-stable protein 1 OS=Homo sapiens OX=9606 GN=CARHSP1 PE=1 SV=2	1	1.87957e-05	1.54817e-05	0.449824	1	1.21405	0.279832
CARM1	Q86X55	sp|Q86X55|CARM1_HUMAN Histone-arginine methyltransferase CARM1 OS=Homo sapiens OX=9606 GN=CARM1 PE=1 SV=3	8	3.86852e-05	1.99288e-05	0.257156	1	1.94117	0.956927
CARS	P49589	sp|P49589|SYCC_HUMAN Cysteine--tRNA ligase, cytoplasmic OS=Homo sapiens OX=9606 GN=CARS PE=1 SV=3	12	1.84973e-05	1.08686e-05	0.306884	1	1.70191	0.767151
CARS2	Q9HA77	sp|Q9HA77|SYCM_HUMAN Probable cysteine--tRNA ligase, mitochondrial OS=Homo sapiens OX=9606 GN=CARS2 PE=1 SV=1	7	9.10943e-05	0.000103888	0.37003	1	0.876849	-0.189599
CASK	O14936	sp|O14936|CSKP_HUMAN Peripheral plasma membrane protein CASK OS=Homo sapiens OX=9606 GN=CASK PE=1 SV=3	18	3.18233e-05	2.76789e-05	0.47405	1	1.14973	0.201298
CASP3	P42574	sp|P42574|CASP3_HUMAN Caspase-3 OS=Homo sapiens OX=9606 GN=CASP3 PE=1 SV=2	2	1.06409e-05	5.09292e-06	0.231295	1	2.08936	1.06306
CASP6	P55212	sp|P55212|CASP6_HUMAN Caspase-6 OS=Homo sapiens OX=9606 GN=CASP6 PE=1 SV=2	1	3.09283e-06	2.71253e-06	0.477765	1	1.1402	0.189287
CAST	P20810	sp|P20810|ICAL_HUMAN Calpastatin OS=Homo sapiens OX=9606 GN=CAST PE=1 SV=4	20	0.000161106	5.12983e-05	0.116753	1	3.14057	1.65103
CAT	P04040	sp|P04040|CATA_HUMAN Catalase OS=Homo sapiens OX=9606 GN=CAT PE=1 SV=3	20	0.00019989	0.000197443	0.457098	1	1.0124	0.0177729
CAV1	Q03135	sp|Q03135|CAV1_HUMAN Caveolin-1 OS=Homo sapiens OX=9606 GN=CAV1 PE=1 SV=4	10	0.00243647	0.00230658	0.483426	1	1.05632	0.0790418
CAV2	P51636	sp|P51636|CAV2_HUMAN Caveolin-2 OS=Homo sapiens OX=9606 GN=CAV2 PE=1 SV=2	3	0.000152155	0.000116436	0.417383	1	1.30677	0.386008
CAVIN1	Q6NZI2	sp|Q6NZI2|CAVN1_HUMAN Caveolae-associated protein 1 OS=Homo sapiens OX=9606 GN=CAVIN1 PE=1 SV=1	12	0.000892048	0.000865427	0.468226	1	1.03076	0.0437082
CAVIN2	O95810	sp|O95810|CAVN2_HUMAN Caveolae-associated protein 2 OS=Homo sapiens OX=9606 GN=CAVIN2 PE=1 SV=3	9	0.000135249	9.50309e-05	0.380464	1	1.42321	0.50915
CAVIN3	Q969G5	sp|Q969G5|CAVN3_HUMAN Caveolae-associated protein 3 OS=Homo sapiens OX=9606 GN=CAVIN3 PE=1 SV=3	6	5.77792e-05	2.08514e-05	0.146617	1	2.77099	1.4704
CBFB	Q13951	sp|Q13951|PEBB_HUMAN Core-binding factor subunit beta OS=Homo sapiens OX=9606 GN=CBFB PE=1 SV=2	2	1.08398e-05	2.26967e-05	0.100499	1	0.477594	-1.06614
CBL	P22681	sp|P22681|CBL_HUMAN E3 ubiquitin-protein ligase CBL OS=Homo sapiens OX=9606 GN=CBL PE=1 SV=2	3	3.31659e-08	4.02267e-06	1.42242e-14	4	0.00824475	-6.92231
CBR1	P16152	sp|P16152|CBR1_HUMAN Carbonyl reductase [NADPH] 1 OS=Homo sapiens OX=9606 GN=CBR1 PE=1 SV=3	12	0.000224752	0.000230658	0.43354	1	0.974398	-0.0374171
CBR3	O75828	sp|O75828|CBR3_HUMAN Carbonyl reductase [NADPH] 3 OS=Homo sapiens OX=9606 GN=CBR3 PE=1 SV=3	3	2.53592e-05	1.12007e-05	0.2048	1	2.26407	1.17892
CBX1	P83916	sp|P83916|CBX1_HUMAN Chromobox protein homolog 1 OS=Homo sapiens OX=9606 GN=CBX1 PE=1 SV=1	4	3.69946e-05	8.54356e-05	0.0761513	1	0.433012	-1.20752
CBX3	Q13185	sp|Q13185|CBX3_HUMAN Chromobox protein homolog 3 OS=Homo sapiens OX=9606 GN=CBX3 PE=1 SV=4	6	0.00110387	0.00145222	0.289648	1	0.760127	-0.395688
CBX5	P45973	sp|P45973|CBX5_HUMAN Chromobox protein homolog 5 OS=Homo sapiens OX=9606 GN=CBX5 PE=1 SV=1	2	1.29282e-05	6.15394e-08	1.7926e-09	4	210.08	7.7148
CC2D1A	Q6P1N0	sp|Q6P1N0|C2D1A_HUMAN Coiled-coil and C2 domain-containing protein 1A OS=Homo sapiens OX=9606 GN=CC2D1A PE=1 SV=1	3	1.80995e-06	1.37103e-06	0.412935	1	1.32014	0.400693
CC2D1B	Q5T0F9	sp|Q5T0F9|C2D1B_HUMAN Coiled-coil and C2 domain-containing protein 1B OS=Homo sapiens OX=9606 GN=CC2D1B PE=1 SV=1	3	2.44642e-06	6.15394e-08	2.71446e-05	4	39.7537	5.31302
CCAR1	Q8IX12	sp|Q8IX12|CCAR1_HUMAN Cell division cycle and apoptosis regulator protein 1 OS=Homo sapiens OX=9606 GN=CCAR1 PE=1 SV=2	17	3.52046e-05	3.48754e-05	0.45529	1	1.00944	0.0135513
CCAR2	Q8N163	sp|Q8N163|CCAR2_HUMAN Cell cycle and apoptosis regulator protein 2 OS=Homo sapiens OX=9606 GN=CCAR2 PE=1 SV=2	14	2.43647e-05	9.61381e-06	0.170803	1	2.53435	1.34161
CCDC12	Q8WUD4	sp|Q8WUD4|CCD12_HUMAN Coiled-coil domain-containing protein 12 OS=Homo sapiens OX=9606 GN=CCDC12 PE=1 SV=1	3	3.58012e-05	2.38039e-05	0.357126	1	1.50401	0.588814
CCDC124	Q96CT7	sp|Q96CT7|CC124_HUMAN Coiled-coil domain-containing protein 124 OS=Homo sapiens OX=9606 GN=CCDC124 PE=1 SV=1	5	2.25747e-05	3.52445e-05	0.205751	1	0.640517	-0.642692
CCDC127	Q96BQ5	sp|Q96BQ5|CC127_HUMAN Coiled-coil domain-containing protein 127 OS=Homo sapiens OX=9606 GN=CCDC127 PE=1 SV=1	2	7.70721e-06	9.8906e-06	0.303033	1	0.779246	-0.359849
CCDC134	Q9H6E4	sp|Q9H6E4|CC134_HUMAN Coiled-coil domain-containing protein 134 OS=Homo sapiens OX=9606 GN=CCDC134 PE=1 SV=1	1	3.31659e-08	3.65362e-06	4.48612e-14	4	0.00907755	-6.78348
CCDC137	Q6PK04	sp|Q6PK04|CC137_HUMAN Coiled-coil domain-containing protein 137 OS=Homo sapiens OX=9606 GN=CCDC137 PE=1 SV=1	1	5.05195e-06	5.84948e-06	0.361146	1	0.863659	-0.211466
CCDC167	Q9P0B6	sp|Q9P0B6|CC167_HUMAN Coiled-coil domain-containing protein 167 OS=Homo sapiens OX=9606 GN=CCDC167 PE=1 SV=2	2	7.77683e-06	1.90062e-05	0.0642931	1	0.409173	-1.28922
CCDC22	O60826	sp|O60826|CCD22_HUMAN Coiled-coil domain-containing protein 22 OS=Homo sapiens OX=9606 GN=CCDC22 PE=1 SV=1	3	1.96907e-06	6.15394e-08	7.44011e-05	4	31.9969	4.99986
CCDC47	Q96A33	sp|Q96A33|CCD47_HUMAN Coiled-coil domain-containing protein 47 OS=Homo sapiens OX=9606 GN=CCDC47 PE=1 SV=1	17	0.000152155	0.000188217	0.323318	1	0.808405	-0.306849
CCDC50	Q8IVM0	sp|Q8IVM0|CCD50_HUMAN Coiled-coil domain-containing protein 50 OS=Homo sapiens OX=9606 GN=CCDC50 PE=1 SV=1	2	1.8199e-05	6.15394e-08	1.63355e-10	4	295.728	8.20813
CCDC58	Q4VC31	sp|Q4VC31|CCD58_HUMAN Coiled-coil domain-containing protein 58 OS=Homo sapiens OX=9606 GN=CCDC58 PE=1 SV=1	2	3.25195e-05	3.10004e-05	0.47911	1	1.049	0.0690176
CCDC6	Q16204	sp|Q16204|CCDC6_HUMAN Coiled-coil domain-containing protein 6 OS=Homo sapiens OX=9606 GN=CCDC6 PE=1 SV=2	10	2.25747e-05	2.47265e-06	0.00848304	3	9.12975	3.19058
CCDC86	Q9H6F5	sp|Q9H6F5|CCD86_HUMAN Coiled-coil domain-containing protein 86 OS=Homo sapiens OX=9606 GN=CCDC86 PE=1 SV=1	6	1.83979e-05	1.17543e-05	0.340591	1	1.5652	0.646348
CCDC88A	Q3V6T2	sp|Q3V6T2|GRDN_HUMAN Girdin OS=Homo sapiens OX=9606 GN=CCDC88A PE=1 SV=2	4	3.65968e-07	6.15394e-08	0.0282616	2	5.94689	2.57214
CCDC9	Q9Y3X0	sp|Q9Y3X0|CCDC9_HUMAN Coiled-coil domain-containing protein 9 OS=Homo sapiens OX=9606 GN=CCDC9 PE=1 SV=1	3	5.99671e-06	6.15394e-08	2.31238e-07	4	97.445	6.60652
CCDC93	Q567U6	sp|Q567U6|CCD93_HUMAN Coiled-coil domain-containing protein 93 OS=Homo sapiens OX=9606 GN=CCDC93 PE=1 SV=2	5	2.87404e-06	6.15394e-08	1.23837e-05	4	46.7025	5.54543
CCDC9B	Q6ZUT6	sp|Q6ZUT6|CCD9B_HUMAN Coiled-coil domain-containing protein 9B OS=Homo sapiens OX=9606 GN=CCDC9B PE=1 SV=1	3	9.8354e-06	6.15394e-08	1.09793e-08	4	159.823	7.32033
CCL28	Q9NRJ3	sp|Q9NRJ3|CCL28_HUMAN C-C motif chemokine 28 OS=Homo sapiens OX=9606 GN=CCL28 PE=1 SV=1	1	0.00106409	0.00122341	0.365275	1	0.869777	-0.201282
CCN1	O00622	sp|O00622|CCN1_HUMAN CCN family member 1 OS=Homo sapiens OX=9606 GN=CCN1 PE=1 SV=1	16	0.000426632	8.02688e-05	0.0374497	2	5.31503	2.41008
CCN2	P29279	sp|P29279|CCN2_HUMAN CCN family member 2 OS=Homo sapiens OX=9606 GN=CCN2 PE=1 SV=2	5	2.09835e-06	3.26611e-06	0.207099	1	0.642461	-0.638318
CCNB1	P14635	sp|P14635|CCNB1_HUMAN G2/mitotic-specific cyclin-B1 OS=Homo sapiens OX=9606 GN=CCNB1 PE=1 SV=1	3	6.0166e-06	5.72031e-06	0.480762	1	1.0518	0.0728551
CCNH	P51946	sp|P51946|CCNH_HUMAN Cyclin-H OS=Homo sapiens OX=9606 GN=CCNH PE=1 SV=1	4	8.19451e-06	5.36971e-06	0.351058	1	1.52606	0.609813
CCNL1	Q9UK58	sp|Q9UK58|CCNL1_HUMAN Cyclin-L1 OS=Homo sapiens OX=9606 GN=CCNL1 PE=1 SV=1	1	1.10387e-06	6.15394e-08	0.000832137	4	17.9376	4.16492
CCNY	Q8ND76	sp|Q8ND76|CCNY_HUMAN Cyclin-Y OS=Homo sapiens OX=9606 GN=CCNY PE=1 SV=2	1	3.31659e-08	1.91907e-06	5.5303e-11	4	0.0172823	-5.85456
CCT2	P78371	sp|P78371|TCPB_HUMAN T-complex protein 1 subunit beta OS=Homo sapiens OX=9606 GN=CCT2 PE=1 SV=4	30	0.000689174	0.000588638	0.465956	1	1.17079	0.227487
CCT3	P49368	sp|P49368|TCPG_HUMAN T-complex protein 1 subunit gamma OS=Homo sapiens OX=9606 GN=CCT3 PE=1 SV=4	33	0.000647406	0.000536971	0.452902	1	1.20566	0.269827
CCT4	P50991	sp|P50991|TCPD_HUMAN T-complex protein 1 subunit delta OS=Homo sapiens OX=9606 GN=CCT4 PE=1 SV=4	29	0.00056387	0.000295242	0.26307	1	1.90986	0.933465
CCT5	P48643	sp|P48643|TCPE_HUMAN T-complex protein 1 subunit epsilon OS=Homo sapiens OX=9606 GN=CCT5 PE=1 SV=1	38	0.000780666	0.00056465	0.392893	1	1.38257	0.467349
CCT6A	P40227	sp|P40227|TCPZ_HUMAN T-complex protein 1 subunit zeta OS=Homo sapiens OX=9606 GN=CCT6A PE=1 SV=3	17	0.000554919	0.000717806	0.29872	1	0.773077	-0.371317
CCT6B	Q92526	sp|Q92526|TCPW_HUMAN T-complex protein 1 subunit zeta-2 OS=Homo sapiens OX=9606 GN=CCT6B PE=1 SV=5	1	3.31659e-08	2.02979e-05	2.07893e-24	4	0.00163396	-9.25741
CCT7	Q99832	sp|Q99832|TCPH_HUMAN T-complex protein 1 subunit eta OS=Homo sapiens OX=9606 GN=CCT7 PE=1 SV=2	23	0.000429615	0.000405957	0.484577	1	1.05828	0.081716
CCT8	P50990	sp|P50990|TCPQ_HUMAN T-complex protein 1 subunit theta OS=Homo sapiens OX=9606 GN=CCT8 PE=1 SV=4	39	0.000753815	0.000590483	0.427628	1	1.27661	0.352314
CCZ1	P86791	sp|P86791|CCZ1_HUMAN Vacuolar fusion protein CCZ1 homolog OS=Homo sapiens OX=9606 GN=CCZ1 PE=1 SV=1;sp|P86790|CCZ1B_HUMAN Vacuolar fusion protein CCZ1 homolog B OS=Homo sapiens OX=9606 GN=CCZ1B PE=1 SV=1	1	3.31659e-08	6.15394e-08	0.137773	1	0.538937	-0.891812
CD151	P48509	sp|P48509|CD151_HUMAN CD151 antigen OS=Homo sapiens OX=9606 GN=CD151 PE=1 SV=3	3	0.000150166	0.000143377	0.478134	1	1.04735	0.0667502
CD274	Q9NZQ7	sp|Q9NZQ7|PD1L1_HUMAN Programmed cell death 1 ligand 1 OS=Homo sapiens OX=9606 GN=CD274 PE=1 SV=1	3	7.12047e-06	1.97443e-05	0.0430347	2	0.360634	-1.47139
CD276	Q5ZPR3	sp|Q5ZPR3|CD276_HUMAN CD276 antigen OS=Homo sapiens OX=9606 GN=CD276 PE=1 SV=1	1	2.61548e-06	6.15394e-08	1.96765e-05	4	42.5009	5.40942
CD2AP	Q9Y5K6	sp|Q9Y5K6|CD2AP_HUMAN CD2-associated protein OS=Homo sapiens OX=9606 GN=CD2AP PE=1 SV=1	8	1.18343e-05	1.04073e-05	0.478974	1	1.13712	0.185383
CD3EAP	O15446	sp|O15446|RPA34_HUMAN DNA-directed RNA polymerase I subunit RPA34 OS=Homo sapiens OX=9606 GN=CD3EAP PE=1 SV=1	3	2.65526e-05	2.06669e-05	0.42482	1	1.28479	0.361529
CD40	P25942	sp|P25942|TNR5_HUMAN Tumor necrosis factor receptor superfamily member 5 OS=Homo sapiens OX=9606 GN=CD40 PE=1 SV=1	2	6.09616e-06	6.15394e-08	2.09963e-07	4	99.061	6.63024
CD44	P16070	sp|P16070|CD44_HUMAN CD44 antigen OS=Homo sapiens OX=9606 GN=CD44 PE=1 SV=3	11	0.000809506	0.000909714	0.378722	1	0.889847	-0.168371
CD46	P15529	sp|P15529|MCP_HUMAN Membrane cofactor protein OS=Homo sapiens OX=9606 GN=CD46 PE=1 SV=3	4	1.39227e-05	9.96441e-06	0.38835	1	1.39724	0.482584
CD47	Q08722	sp|Q08722|CD47_HUMAN Leukocyte surface antigen CD47 OS=Homo sapiens OX=9606 GN=CD47 PE=1 SV=1	4	6.21549e-05	6.18162e-05	0.452863	1	1.00548	0.00788327
CD55	P08174	sp|P08174|DAF_HUMAN Complement decay-accelerating factor OS=Homo sapiens OX=9606 GN=CD55 PE=1 SV=4	11	0.000116354	5.27745e-05	0.213354	1	2.20474	1.14061
CD58	P19256	sp|P19256|LFA3_HUMAN Lymphocyte function-associated antigen 3 OS=Homo sapiens OX=9606 GN=CD58 PE=1 SV=1	2	3.35139e-05	6.15394e-08	1.58571e-12	4	544.593	9.08903
CD59	P13987	sp|P13987|CD59_HUMAN CD59 glycoprotein OS=Homo sapiens OX=9606 GN=CD59 PE=1 SV=1	4	0.000517129	0.000310004	0.314818	1	1.66814	0.738239
CD63	P08962	sp|P08962|CD63_HUMAN CD63 antigen OS=Homo sapiens OX=9606 GN=CD63 PE=1 SV=2	2	0.000222763	0.000267563	0.33997	1	0.832565	-0.264366
CD68	P34810	sp|P34810|CD68_HUMAN Macrosialin OS=Homo sapiens OX=9606 GN=CD68 PE=1 SV=2	1	3.31659e-08	1.76961e-05	1.80871e-23	4	0.0018742	-9.05951
CD74	P04233	sp|P04233|HG2A_HUMAN HLA class II histocompatibility antigen gamma chain OS=Homo sapiens OX=9606 GN=CD74 PE=1 SV=3	4	5.40002e-05	6.49532e-05	0.339151	1	0.831371	-0.266435
CD81	P60033	sp|P60033|CD81_HUMAN CD81 antigen OS=Homo sapiens OX=9606 GN=CD81 PE=1 SV=1	4	0.000155139	0.000135442	0.475725	1	1.14542	0.195882
CD82	P27701	sp|P27701|CD82_HUMAN CD82 antigen OS=Homo sapiens OX=9606 GN=CD82 PE=1 SV=1	7	0.000164089	0.00021036	0.303588	1	0.78004	-0.35838
CD9	P21926	sp|P21926|CD9_HUMAN CD9 antigen OS=Homo sapiens OX=9606 GN=CD9 PE=1 SV=4	4	6.84202e-05	0.000123079	0.14869	1	0.555905	-0.84709
CD97	P48960	sp|P48960|CD97_HUMAN CD97 antigen OS=Homo sapiens OX=9606 GN=CD97 PE=1 SV=4	13	0.000226741	0.000195598	0.470383	1	1.15922	0.213158
CD99	P14209	sp|P14209|CD99_HUMAN CD99 antigen OS=Homo sapiens OX=9606 GN=CD99 PE=1 SV=1	2	0.000359007	0.000409648	0.369715	1	0.876379	-0.190373
CD99L2	Q8TCZ2	sp|Q8TCZ2|C99L2_HUMAN CD99 antigen-like protein 2 OS=Homo sapiens OX=9606 GN=CD99L2 PE=1 SV=1	1	3.31659e-08	5.62805e-06	2.17173e-16	4	0.00589297	-7.40679
CDA	P32320	sp|P32320|CDD_HUMAN Cytidine deaminase OS=Homo sapiens OX=9606 GN=CDA PE=1 SV=2	3	3.21217e-05	6.15394e-08	2.221e-12	4	521.969	9.02782
CDC123	O75794	sp|O75794|CD123_HUMAN Cell division cycle protein 123 homolog OS=Homo sapiens OX=9606 GN=CDC123 PE=1 SV=1	4	7.45859e-06	4.55779e-06	0.322492	1	1.63645	0.710568
CDC20	Q12834	sp|Q12834|CDC20_HUMAN Cell division cycle protein 20 homolog OS=Homo sapiens OX=9606 GN=CDC20 PE=1 SV=2	1	3.07294e-06	2.8048e-06	0.495595	1	1.0956	0.131724
CDC23	Q9UJX2	sp|Q9UJX2|CDC23_HUMAN Cell division cycle protein 23 homolog OS=Homo sapiens OX=9606 GN=CDC23 PE=1 SV=3	8	8.23429e-06	8.69118e-06	0.4164	1	0.94743	-0.0779081
CDC26	Q8NHZ8	sp|Q8NHZ8|CDC26_HUMAN Anaphase-promoting complex subunit CDC26 OS=Homo sapiens OX=9606 GN=CDC26 PE=1 SV=1	1	1.37238e-05	6.15394e-08	1.19202e-09	4	223.008	7.80095
CDC37	Q16543	sp|Q16543|CDC37_HUMAN Hsp90 co-chaperone Cdc37 OS=Homo sapiens OX=9606 GN=CDC37 PE=1 SV=1	9	0.000993485	0.000337683	0.131742	1	2.94207	1.55683
CDC40	O60508	sp|O60508|PRP17_HUMAN Pre-mRNA-processing factor 17 OS=Homo sapiens OX=9606 GN=CDC40 PE=1 SV=1	2	2.33703e-06	6.15394e-08	3.37291e-05	4	37.9761	5.24702
CDC42	P60953	sp|P60953|CDC42_HUMAN Cell division control protein 42 homolog OS=Homo sapiens OX=9606 GN=CDC42 PE=1 SV=2	6	0.000794589	0.000649532	0.446451	1	1.22333	0.290808
CDC42BPA	Q5VT25	sp|Q5VT25|MRCKA_HUMAN Serine/threonine-protein kinase MRCK alpha OS=Homo sapiens OX=9606 GN=CDC42BPA PE=1 SV=1	4	3.31659e-08	5.70186e-07	2.55556e-06	4	0.0581668	-4.10366
CDC42BPB	Q9Y5S2	sp|Q9Y5S2|MRCKB_HUMAN Serine/threonine-protein kinase MRCK beta OS=Homo sapiens OX=9606 GN=CDC42BPB PE=1 SV=2	2	3.31659e-08	4.57625e-07	1.23553e-05	4	0.072474	-3.78639
CDC5L	Q99459	sp|Q99459|CDC5L_HUMAN Cell division cycle 5-like protein OS=Homo sapiens OX=9606 GN=CDC5L PE=1 SV=2	21	5.93704e-05	3.35837e-05	0.292087	1	1.76783	0.821981
CDC73	Q6P1J9	sp|Q6P1J9|CDC73_HUMAN Parafibromin OS=Homo sapiens OX=9606 GN=CDC73 PE=1 SV=1	3	8.58235e-07	2.73099e-06	0.026739	2	0.314258	-1.66998
CDCP1	Q9H5V8	sp|Q9H5V8|CDCP1_HUMAN CUB domain-containing protein 1 OS=Homo sapiens OX=9606 GN=CDCP1 PE=1 SV=3	10	2.29725e-05	2.1036e-05	0.497044	1	1.09206	0.127047
CDIPT	O14735	sp|O14735|CDIPT_HUMAN CDP-diacylglycerol--inositol 3-phosphatidyltransferase OS=Homo sapiens OX=9606 GN=CDIPT PE=1 SV=1	3	5.54919e-05	3.8566e-05	0.375797	1	1.43888	0.52495
CDK1	P06493	sp|P06493|CDK1_HUMAN Cyclin-dependent kinase 1 OS=Homo sapiens OX=9606 GN=CDK1 PE=1 SV=3	14	0.000255581	0.000437327	0.167495	1	0.584417	-0.774931
CDK11A	Q9UQ88	sp|Q9UQ88|CD11A_HUMAN Cyclin-dependent kinase 11A OS=Homo sapiens OX=9606 GN=CDK11A PE=1 SV=4;sp|P21127|CD11B_HUMAN Cyclin-dependent kinase 11B OS=Homo sapiens OX=9606 GN=CDK11B PE=1 SV=4	7	1.05415e-05	1.33966e-05	0.308359	1	0.786878	-0.345789
CDK12	Q9NYV4	sp|Q9NYV4|CDK12_HUMAN Cyclin-dependent kinase 12 OS=Homo sapiens OX=9606 GN=CDK12 PE=1 SV=2	2	3.31659e-08	6.15394e-08	0.137773	1	0.538937	-0.891812
CDK16	Q00536	sp|Q00536|CDK16_HUMAN Cyclin-dependent kinase 16 OS=Homo sapiens OX=9606 GN=CDK16 PE=1 SV=1;sp|Q07002|CDK18_HUMAN Cyclin-dependent kinase 18 OS=Homo sapiens OX=9606 GN=CDK18 PE=1 SV=4	1	3.31659e-08	6.15394e-08	0.137773	1	0.538937	-0.891812
CDK2	P24941	sp|P24941|CDK2_HUMAN Cyclin-dependent kinase 2 OS=Homo sapiens OX=9606 GN=CDK2 PE=1 SV=2	6	8.07517e-06	1.25293e-05	0.208514	1	0.644502	-0.633744
CDK5	Q00535	sp|Q00535|CDK5_HUMAN Cyclin-dependent-like kinase 5 OS=Homo sapiens OX=9606 GN=CDK5 PE=1 SV=3	3	3.31659e-08	1.7124e-06	1.75824e-10	4	0.019368	-5.69018
CDK5RAP1	Q96SZ6	sp|Q96SZ6|CK5P1_HUMAN CDK5 regulatory subunit-associated protein 1 OS=Homo sapiens OX=9606 GN=CDK5RAP1 PE=1 SV=2	1	1.07404e-06	1.19019e-06	0.387057	1	0.902406	-0.148152
CDK5RAP3	Q96JB5	sp|Q96JB5|CK5P3_HUMAN CDK5 regulatory subunit-associated protein 3 OS=Homo sapiens OX=9606 GN=CDK5RAP3 PE=1 SV=2	6	1.47183e-05	9.50309e-06	0.344933	1	1.54879	0.631141
CDK7	P50613	sp|P50613|CDK7_HUMAN Cyclin-dependent kinase 7 OS=Homo sapiens OX=9606 GN=CDK7 PE=1 SV=1	2	3.063e-06	4.66851e-06	0.21658	1	0.656097	-0.608019
CDK9	P50750	sp|P50750|CDK9_HUMAN Cyclin-dependent kinase 9 OS=Homo sapiens OX=9606 GN=CDK9 PE=1 SV=3	3	4.65416e-06	4.57625e-06	0.45992	1	1.01703	0.0243566
CDKAL1	Q5VV42	sp|Q5VV42|CDKAL_HUMAN Threonylcarbamoyladenosine tRNA methylthiotransferase OS=Homo sapiens OX=9606 GN=CDKAL1 PE=1 SV=1	1	1.38233e-06	6.15394e-08	0.00034124	4	22.4624	4.48944
CDKN2AIP	Q9NXV6	sp|Q9NXV6|CARF_HUMAN CDKN2A-interacting protein OS=Homo sapiens OX=9606 GN=CDKN2AIP PE=1 SV=3	6	8.02545e-06	6.15394e-08	3.9835e-08	4	130.411	7.02693
CDKN2AIPNL	Q96HQ2	sp|Q96HQ2|C2AIL_HUMAN CDKN2AIP N-terminal-like protein OS=Homo sapiens OX=9606 GN=CDKN2AIPNL PE=1 SV=1	2	5.98676e-05	7.17806e-05	0.340979	1	0.834036	-0.261818
CDS2	O95674	sp|O95674|CDS2_HUMAN Phosphatidate cytidylyltransferase 2 OS=Homo sapiens OX=9606 GN=CDS2 PE=1 SV=1	2	1.45194e-05	1.95598e-05	0.277132	1	0.742309	-0.429908
CDV3	Q9UKY7	sp|Q9UKY7|CDV3_HUMAN Protein CDV3 homolog OS=Homo sapiens OX=9606 GN=CDV3 PE=1 SV=1	9	0.000132266	7.54712e-05	0.295442	1	1.75253	0.809442
CDYL	Q9Y232	sp|Q9Y232|CDYL_HUMAN Chromodomain Y-like protein OS=Homo sapiens OX=9606 GN=CDYL PE=1 SV=2	2	3.31659e-08	2.08514e-06	2.33568e-11	4	0.0159058	-5.9743
CEBPB	P17676	sp|P17676|CEBPB_HUMAN CCAAT/enhancer-binding protein beta OS=Homo sapiens OX=9606 GN=CEBPB PE=1 SV=2	1	8.35362e-06	7.34414e-06	0.478842	1	1.13745	0.185809
CEBPZ	Q03701	sp|Q03701|CEBPZ_HUMAN CCAAT/enhancer-binding protein zeta OS=Homo sapiens OX=9606 GN=CEBPZ PE=1 SV=3	16	1.32266e-05	1.14037e-05	0.470142	1	1.15985	0.213936
CELF1	Q92879	sp|Q92879|CELF1_HUMAN CUGBP Elav-like family member 1 OS=Homo sapiens OX=9606 GN=CELF1 PE=1 SV=2	5	2.8641e-05	2.19586e-05	0.418205	1	1.30432	0.383295
CENPB	P07199	sp|P07199|CENPB_HUMAN Major centromere autoantigen B OS=Homo sapiens OX=9606 GN=CENPB PE=1 SV=2	4	2.79449e-06	2.06669e-06	0.402509	1	1.35215	0.43526
CENPF	P49454	sp|P49454|CENPF_HUMAN Centromere protein F OS=Homo sapiens OX=9606 GN=CENPF PE=1 SV=3	3	3.4409e-07	4.35482e-07	0.31063	1	0.790136	-0.339827
CENPV	Q7Z7K6	sp|Q7Z7K6|CENPV_HUMAN Centromere protein V OS=Homo sapiens OX=9606 GN=CENPV PE=1 SV=1	5	4.66411e-05	3.26611e-05	0.379022	1	1.42803	0.514027
CEP164	Q9UPV0	sp|Q9UPV0|CE164_HUMAN Centrosomal protein of 164 kDa OS=Homo sapiens OX=9606 GN=CEP164 PE=1 SV=3	1	1.9989e-06	6.15394e-08	6.95073e-05	4	32.4817	5.02155
CEP170	Q5SW79	sp|Q5SW79|CE170_HUMAN Centrosomal protein of 170 kDa OS=Homo sapiens OX=9606 GN=CEP170 PE=1 SV=1	5	5.09173e-07	4.85304e-07	0.479218	1	1.04919	0.0692692
CEP41	Q9BYV8	sp|Q9BYV8|CEP41_HUMAN Centrosomal protein of 41 kDa OS=Homo sapiens OX=9606 GN=CEP41 PE=1 SV=1	2	2.83427e-06	6.15394e-08	1.32701e-05	4	46.0561	5.52532
CEP44	Q9C0F1	sp|Q9C0F1|CEP44_HUMAN Centrosomal protein of 44 kDa OS=Homo sapiens OX=9606 GN=CEP44 PE=1 SV=2	2	3.31659e-08	6.15394e-08	0.137773	1	0.538937	-0.891812
CEP55	Q53EZ4	sp|Q53EZ4|CEP55_HUMAN Centrosomal protein of 55 kDa OS=Homo sapiens OX=9606 GN=CEP55 PE=1 SV=3	3	4.94256e-06	1.97443e-06	0.174334	1	2.50329	1.32382
CEP97	Q8IW35	sp|Q8IW35|CEP97_HUMAN Centrosomal protein of 97 kDa OS=Homo sapiens OX=9606 GN=CEP97 PE=1 SV=1	2	1.21326e-06	6.15394e-08	0.000576401	4	19.7152	4.30124
CEPT1	Q9Y6K0	sp|Q9Y6K0|CEPT1_HUMAN Choline/ethanolaminephosphotransferase 1 OS=Homo sapiens OX=9606 GN=CEPT1 PE=1 SV=1	1	1.55139e-05	1.44299e-05	0.49439	1	1.07512	0.104494
CERS2	Q96G23	sp|Q96G23|CERS2_HUMAN Ceramide synthase 2 OS=Homo sapiens OX=9606 GN=CERS2 PE=1 SV=1	6	0.000194918	0.000230658	0.348512	1	0.845053	-0.242886
CERS6	Q6ZMG9	sp|Q6ZMG9|CERS6_HUMAN Ceramide synthase 6 OS=Homo sapiens OX=9606 GN=CERS6 PE=1 SV=1	1	2.1978e-06	3.93041e-06	0.150822	1	0.559179	-0.838619
CFAP20	Q9Y6A4	sp|Q9Y6A4|CFA20_HUMAN Cilia- and flagella-associated protein 20 OS=Homo sapiens OX=9606 GN=CFAP20 PE=1 SV=1	2	1.22321e-05	1.16067e-05	0.481993	1	1.05388	0.0757146
CFDP1	Q9UEE9	sp|Q9UEE9|CFDP1_HUMAN Craniofacial development protein 1 OS=Homo sapiens OX=9606 GN=CFDP1 PE=1 SV=1	1	5.85748e-06	6.15394e-08	2.65262e-07	4	95.1826	6.57263
CFL1	P23528	sp|P23528|COF1_HUMAN Cofilin-1 OS=Homo sapiens OX=9606 GN=CFL1 PE=1 SV=3	14	0.00650389	0.00573876	0.480465	1	1.13333	0.180564
CFL2	Q9Y281	sp|Q9Y281|COF2_HUMAN Cofilin-2 OS=Homo sapiens OX=9606 GN=CFL2 PE=1 SV=1	3	7.21992e-06	4.5947e-06	0.338979	1	1.57136	0.652012
CGAS	Q8N884	sp|Q8N884|CGAS_HUMAN Cyclic GMP-AMP synthase OS=Homo sapiens OX=9606 GN=CGAS PE=1 SV=2	9	1.64089e-05	1.91907e-05	0.355311	1	0.855044	-0.225929
CGGBP1	Q9UFW8	sp|Q9UFW8|CGBP1_HUMAN CGG triplet repeat-binding protein 1 OS=Homo sapiens OX=9606 GN=CGGBP1 PE=1 SV=2	1	3.25195e-06	6.15394e-08	6.6422e-06	4	52.8433	5.72365
CHAF1B	Q13112	sp|Q13112|CAF1B_HUMAN Chromatin assembly factor 1 subunit B OS=Homo sapiens OX=9606 GN=CHAF1B PE=1 SV=1	3	5.29063e-06	6.15394e-08	4.77111e-07	4	85.9713	6.42578
CHAMP1	Q96JM3	sp|Q96JM3|CHAP1_HUMAN Chromosome alignment-maintaining phosphoprotein 1 OS=Homo sapiens OX=9606 GN=CHAMP1 PE=1 SV=2	2	3.85858e-07	6.15394e-08	0.0246322	2	6.27009	2.64849
CHCHD1	Q96BP2	sp|Q96BP2|CHCH1_HUMAN Coiled-coil-helix-coiled-coil-helix domain-containing protein 1 OS=Homo sapiens OX=9606 GN=CHCHD1 PE=1 SV=1	1	1.05415e-05	6.15394e-08	6.99454e-09	4	171.296	7.42035
CHCHD2	Q9Y6H1	sp|Q9Y6H1|CHCH2_HUMAN Coiled-coil-helix-coiled-coil-helix domain-containing protein 2 OS=Homo sapiens OX=9606 GN=CHCHD2 PE=1 SV=1;sp|Q5T1J5|CHCH9_HUMAN Putative coiled-coil-helix-coiled-coil-helix domain-containing protein CHCHD2P9, mitochondrial OS=Homo s	2	0.000120332	9.55845e-05	0.433776	1	1.25891	0.332171
CHCHD3	Q9NX63	sp|Q9NX63|MIC19_HUMAN MICOS complex subunit MIC19 OS=Homo sapiens OX=9606 GN=CHCHD3 PE=1 SV=1	8	0.00029536	0.000221431	0.408426	1	1.33387	0.415617
CHCHD4	Q8N4Q1	sp|Q8N4Q1|MIA40_HUMAN Mitochondrial intermembrane space import and assembly protein 40 OS=Homo sapiens OX=9606 GN=CHCHD4 PE=1 SV=1	4	4.15692e-05	2.98932e-05	0.390401	1	1.39059	0.475697
CHD1	O14646	sp|O14646|CHD1_HUMAN Chromodomain-helicase-DNA-binding protein 1 OS=Homo sapiens OX=9606 GN=CHD1 PE=1 SV=2;sp|O14647|CHD2_HUMAN Chromodomain-helicase-DNA-binding protein 2 OS=Homo sapiens OX=9606 GN=CHD2 PE=1 SV=2	4	3.11272e-06	4.35482e-07	0.0172947	2	7.14776	2.83749
CHD4	Q14839	sp|Q14839|CHD4_HUMAN Chromodomain-helicase-DNA-binding protein 4 OS=Homo sapiens OX=9606 GN=CHD4 PE=1 SV=2	32	2.71493e-05	2.21431e-05	0.445454	1	1.22608	0.294055
CHERP	Q8IWX8	sp|Q8IWX8|CHERP_HUMAN Calcium homeostasis endoplasmic reticulum protein OS=Homo sapiens OX=9606 GN=CHERP PE=1 SV=3	9	1.76023e-05	8.69118e-06	0.24206	1	2.0253	1.01814
CHID1	Q9BWS9	sp|Q9BWS9|CHID1_HUMAN Chitinase domain-containing protein 1 OS=Homo sapiens OX=9606 GN=CHID1 PE=1 SV=1	7	1.98896e-05	2.39884e-05	0.337615	1	0.829134	-0.270323
CHMP1B	Q7LBR1	sp|Q7LBR1|CHM1B_HUMAN Charged multivesicular body protein 1b OS=Homo sapiens OX=9606 GN=CHMP1B PE=1 SV=1	1	1.45194e-05	1.32305e-05	0.494855	1	1.09742	0.134112
CHMP2A	O43633	sp|O43633|CHM2A_HUMAN Charged multivesicular body protein 2a OS=Homo sapiens OX=9606 GN=CHMP2A PE=1 SV=1	6	3.62985e-05	2.02979e-05	0.287673	1	1.78829	0.838581
CHMP3	Q9Y3E7	sp|Q9Y3E7|CHMP3_HUMAN Charged multivesicular body protein 3 OS=Homo sapiens OX=9606 GN=CHMP3 PE=1 SV=3	6	4.70389e-05	1.54264e-05	0.12337	1	3.04925	1.60845
CHMP4B	Q9H444	sp|Q9H444|CHM4B_HUMAN Charged multivesicular body protein 4b OS=Homo sapiens OX=9606 GN=CHMP4B PE=1 SV=1	9	0.000110387	0.000109055	0.456989	1	1.01222	0.0175178
CHMP5	Q9NZZ3	sp|Q9NZZ3|CHMP5_HUMAN Charged multivesicular body protein 5 OS=Homo sapiens OX=9606 GN=CHMP5 PE=1 SV=1	4	8.26412e-05	4.05957e-05	0.240269	1	2.03571	1.02553
CHMP6	Q96FZ7	sp|Q96FZ7|CHMP6_HUMAN Charged multivesicular body protein 6 OS=Homo sapiens OX=9606 GN=CHMP6 PE=1 SV=3	2	3.04311e-05	2.06669e-05	0.366031	1	1.47245	0.558221
CHORDC1	Q9UHD1	sp|Q9UHD1|CHRD1_HUMAN Cysteine and histidine-rich domain-containing protein 1 OS=Homo sapiens OX=9606 GN=CHORDC1 PE=1 SV=2	6	3.69946e-05	3.45064e-06	0.0051213	3	10.7211	3.42238
CHP1	Q99653	sp|Q99653|CHP1_HUMAN Calcineurin B homologous protein 1 OS=Homo sapiens OX=9606 GN=CHP1 PE=1 SV=3	6	5.16135e-05	4.41017e-05	0.466133	1	1.17033	0.226912
CHST14	Q8NCH0	sp|Q8NCH0|CHSTE_HUMAN Carbohydrate sulfotransferase 14 OS=Homo sapiens OX=9606 GN=CHST14 PE=1 SV=2	3	1.10387e-05	2.25122e-06	0.0454433	2	4.90344	2.29379
CHTOP	Q9Y3Y2	sp|Q9Y3Y2|CHTOP_HUMAN Chromatin target of PRMT1 protein OS=Homo sapiens OX=9606 GN=CHTOP PE=1 SV=2	4	6.61329e-05	4.77923e-05	0.392522	1	1.38376	0.46859
CHUK	O15111	sp|O15111|IKKA_HUMAN Inhibitor of nuclear factor kappa-B kinase subunit alpha OS=Homo sapiens OX=9606 GN=CHUK PE=1 SV=2	1	9.68623e-07	6.15394e-08	0.00135921	3	15.7399	3.97635
CIAO1	O76071	sp|O76071|CIAO1_HUMAN Probable cytosolic iron-sulfur protein assembly protein CIAO1 OS=Homo sapiens OX=9606 GN=CIAO1 PE=1 SV=1	5	6.79229e-06	1.32121e-05	0.122228	1	0.514098	-0.959886
CIAO2B	Q9Y3D0	sp|Q9Y3D0|CIA2B_HUMAN Cytosolic iron-sulfur assembly component 2B OS=Homo sapiens OX=9606 GN=CIAO2B PE=1 SV=1	4	6.75251e-05	7.27033e-06	0.00804924	3	9.28777	3.21533
CIAPIN1	Q6FI81	sp|Q6FI81|CPIN1_HUMAN Anamorsin OS=Homo sapiens OX=9606 GN=CIAPIN1 PE=1 SV=2	1	3.31659e-08	5.09292e-06	7.75197e-16	4	0.00651215	-7.26265
CIP2A	Q8TCG1	sp|Q8TCG1|CIP2A_HUMAN Protein CIP2A OS=Homo sapiens OX=9606 GN=CIP2A PE=1 SV=2	5	1.66078e-06	1.78806e-06	0.404376	1	0.928818	-0.106532
CIRBP	Q14011	sp|Q14011|CIRBP_HUMAN Cold-inducible RNA-binding protein OS=Homo sapiens OX=9606 GN=CIRBP PE=1 SV=1	2	3.23206e-05	8.96797e-05	0.0429422	2	0.3604	-1.47233
CISD2	Q8N5K1	sp|Q8N5K1|CISD2_HUMAN CDGSH iron-sulfur domain-containing protein 2 OS=Homo sapiens OX=9606 GN=CISD2 PE=1 SV=1	5	5.94699e-05	3.5429e-05	0.312342	1	1.67856	0.747227
CIT	O14578	sp|O14578|CTRO_HUMAN Citron Rho-interacting kinase OS=Homo sapiens OX=9606 GN=CIT PE=1 SV=2	7	1.38233e-06	6.08936e-07	0.203958	1	2.27007	1.18274
CKAP4	Q07065	sp|Q07065|CKAP4_HUMAN Cytoskeleton-associated protein 4 OS=Homo sapiens OX=9606 GN=CKAP4 PE=1 SV=2	34	0.000588732	0.000642151	0.39654	1	0.916812	-0.125302
CKAP5	Q14008	sp|Q14008|CKAP5_HUMAN Cytoskeleton-associated protein 5 OS=Homo sapiens OX=9606 GN=CKAP5 PE=1 SV=3	47	4.87295e-05	3.39528e-05	0.376885	1	1.43521	0.521264
CKB	P12277	sp|P12277|KCRB_HUMAN Creatine kinase B-type OS=Homo sapiens OX=9606 GN=CKB PE=1 SV=1	6	1.73039e-05	1.77699e-05	0.433151	1	0.97378	-0.0383322
CKS2	P33552	sp|P33552|CKS2_HUMAN Cyclin-dependent kinases regulatory subunit 2 OS=Homo sapiens OX=9606 GN=CKS2 PE=1 SV=1	1	1.5315e-05	2.38039e-05	0.207737	1	0.643382	-0.636253
CLASP1	Q7Z460	sp|Q7Z460|CLAP1_HUMAN CLIP-associating protein 1 OS=Homo sapiens OX=9606 GN=CLASP1 PE=1 SV=1	2	3.31659e-08	6.15394e-08	0.137773	1	0.538937	-0.891812
CLASP2	O75122	sp|O75122|CLAP2_HUMAN CLIP-associating protein 2 OS=Homo sapiens OX=9606 GN=CLASP2 PE=1 SV=3	2	1.65084e-06	1.13484e-06	0.37116	1	1.45469	0.540713
CLCC1	Q96S66	sp|Q96S66|CLCC1_HUMAN Chloride channel CLIC-like protein 1 OS=Homo sapiens OX=9606 GN=CLCC1 PE=1 SV=1	6	3.31659e-08	2.52801e-06	2.96715e-12	4	0.0131194	-6.25216
CLCN3	P51790	sp|P51790|CLCN3_HUMAN H(+)/Cl(-) exchange transporter 3 OS=Homo sapiens OX=9606 GN=CLCN3 PE=1 SV=2;sp|P51795|CLCN5_HUMAN H(+)/Cl(-) exchange transporter 5 OS=Homo sapiens OX=9606 GN=CLCN5 PE=1 SV=1;sp|P51793|CLCN4_HUMAN H(+)/Cl(-) exchange transporter 4 OS	2	3.31659e-08	6.15394e-08	0.137773	1	0.538937	-0.891812
CLCN7	P51798	sp|P51798|CLCN7_HUMAN H(+)/Cl(-) exchange transporter 7 OS=Homo sapiens OX=9606 GN=CLCN7 PE=1 SV=2	3	3.31659e-08	6.12627e-06	7.23603e-17	4	0.00541372	-7.52916
CLDN4	O14493	sp|O14493|CLD4_HUMAN Claudin-4 OS=Homo sapiens OX=9606 GN=CLDN4 PE=1 SV=1;sp|O95484|CLD9_HUMAN Claudin-9 OS=Homo sapiens OX=9606 GN=CLDN9 PE=1 SV=1;sp|P56747|CLD6_HUMAN Claudin-6 OS=Homo sapiens OX=9606 GN=CLDN6 PE=1 SV=2;sp|O15551|CLD3_HUMAN Claudin-3 OS=	1	9.85529e-05	8.59892e-05	0.475458	1	1.14611	0.196743
CLGN	O14967	sp|O14967|CLGN_HUMAN Calmegin OS=Homo sapiens OX=9606 GN=CLGN PE=1 SV=1	4	3.33151e-06	1.90062e-06	0.295371	1	1.75285	0.809705
CLIC1	O00299	sp|O00299|CLIC1_HUMAN Chloride intracellular channel protein 1 OS=Homo sapiens OX=9606 GN=CLIC1 PE=1 SV=4	14	0.00148177	0.00104257	0.381048	1	1.42127	0.507178
CLIC3	O95833	sp|O95833|CLIC3_HUMAN Chloride intracellular channel protein 3 OS=Homo sapiens OX=9606 GN=CLIC3 PE=1 SV=2	3	1.36244e-05	2.43574e-05	0.150934	1	0.559351	-0.838174
CLIC4	Q9Y696	sp|Q9Y696|CLIC4_HUMAN Chloride intracellular channel protein 4 OS=Homo sapiens OX=9606 GN=CLIC4 PE=1 SV=4	16	0.000296355	0.000195598	0.354052	1	1.51512	0.599436
CLINT1	Q14677	sp|Q14677|EPN4_HUMAN Clathrin interactor 1 OS=Homo sapiens OX=9606 GN=CLINT1 PE=1 SV=1	6	2.55581e-05	1.48174e-05	0.301629	1	1.72487	0.786485
CLIP1	P30622	sp|P30622|CLIP1_HUMAN CAP-Gly domain-containing linker protein 1 OS=Homo sapiens OX=9606 GN=CLIP1 PE=1 SV=2	11	6.87185e-06	3.57981e-06	0.261209	1	1.91962	0.940817
CLIP2	Q9UDT6	sp|Q9UDT6|CLIP2_HUMAN CAP-Gly domain-containing linker protein 2 OS=Homo sapiens OX=9606 GN=CLIP2 PE=1 SV=1	1	7.94589e-07	6.15394e-08	0.00275223	3	12.9119	3.69063
CLN6	Q9NWW5	sp|Q9NWW5|CLN6_HUMAN Ceroid-lipofuscinosis neuronal protein 6 OS=Homo sapiens OX=9606 GN=CLN6 PE=1 SV=1	1	6.98124e-06	6.15394e-08	9.35876e-08	4	113.443	6.82583
CLNS1A	P54105	sp|P54105|ICLN_HUMAN Methylosome subunit pICln OS=Homo sapiens OX=9606 GN=CLNS1A PE=1 SV=1	5	6.05638e-05	3.00778e-05	0.244098	1	2.01357	1.00976
CLPB	Q9H078	sp|Q9H078|CLPB_HUMAN Caseinolytic peptidase B protein homolog OS=Homo sapiens OX=9606 GN=CLPB PE=1 SV=1	7	6.60334e-06	9.48464e-06	0.244689	1	0.696214	-0.522397
CLPP	Q16740	sp|Q16740|CLPP_HUMAN ATP-dependent Clp protease proteolytic subunit, mitochondrial OS=Homo sapiens OX=9606 GN=CLPP PE=1 SV=1	7	6.44422e-05	8.80189e-05	0.269978	1	0.732141	-0.449807
CLPTM1	O96005	sp|O96005|CLPT1_HUMAN Cleft lip and palate transmembrane protein 1 OS=Homo sapiens OX=9606 GN=CLPTM1 PE=1 SV=1	14	3.6199e-05	5.25899e-05	0.239145	1	0.688326	-0.538835
CLPTM1L	Q96KA5	sp|Q96KA5|CLP1L_HUMAN Cleft lip and palate transmembrane protein 1-like protein OS=Homo sapiens OX=9606 GN=CLPTM1L PE=1 SV=1	7	1.2431e-05	2.08514e-05	0.175389	1	0.596169	-0.746206
CLPX	O76031	sp|O76031|CLPX_HUMAN ATP-dependent Clp protease ATP-binding subunit clpX-like, mitochondrial OS=Homo sapiens OX=9606 GN=CLPX PE=1 SV=2	10	9.78567e-06	1.74377e-05	0.152127	1	0.561179	-0.833468
CLTA	P09496	sp|P09496|CLCA_HUMAN Clathrin light chain A OS=Homo sapiens OX=9606 GN=CLTA PE=1 SV=1	7	0.0004684	0.000326611	0.377209	1	1.43412	0.520166
CLTB	P09497	sp|P09497|CLCB_HUMAN Clathrin light chain B OS=Homo sapiens OX=9606 GN=CLTB PE=1 SV=1	5	0.00017105	0.000132674	0.423298	1	1.28925	0.366533
CLTC	Q00610	sp|Q00610|CLH1_HUMAN Clathrin heavy chain 1 OS=Homo sapiens OX=9606 GN=CLTC PE=1 SV=5	68	0.00106409	0.000996441	0.490199	1	1.06789	0.0947677
CLTCL1	P53675	sp|P53675|CLH2_HUMAN Clathrin heavy chain 2 OS=Homo sapiens OX=9606 GN=CLTCL1 PE=1 SV=2	1	3.31659e-08	6.15394e-08	0.137773	1	0.538937	-0.891812
CLUH	O75153	sp|O75153|CLU_HUMAN Clustered mitochondria protein homolog OS=Homo sapiens OX=9606 GN=CLUH PE=1 SV=2	17	1.85968e-05	8.67273e-06	0.222531	1	2.14428	1.10049
CMAS	Q8NFW8	sp|Q8NFW8|NEUA_HUMAN N-acylneuraminate cytidylyltransferase OS=Homo sapiens OX=9606 GN=CMAS PE=1 SV=2	4	3.43095e-06	3.78278e-06	0.390085	1	0.906991	-0.140839
CMBL	Q96DG6	sp|Q96DG6|CMBL_HUMAN Carboxymethylenebutenolidase homolog OS=Homo sapiens OX=9606 GN=CMBL PE=1 SV=1	3	6.00665e-06	6.15394e-08	2.29004e-07	4	97.6066	6.60891
CMC1	Q7Z7K0	sp|Q7Z7K0|COXM1_HUMAN COX assembly mitochondrial protein homolog OS=Homo sapiens OX=9606 GN=CMC1 PE=1 SV=1	2	6.76246e-05	6.15394e-08	4.35711e-15	4	1098.88	10.1018
CMPK1	P30085	sp|P30085|KCY_HUMAN UMP-CMP kinase OS=Homo sapiens OX=9606 GN=CMPK1 PE=1 SV=3	10	0.000160111	0.000110716	0.373658	1	1.44615	0.532214
CMSS1	Q9BQ75	sp|Q9BQ75|CMS1_HUMAN Protein CMSS1 OS=Homo sapiens OX=9606 GN=CMSS1 PE=1 SV=2	4	1.38233e-05	2.25122e-05	0.187523	1	0.614035	-0.703608
CMTM7	Q96FZ5	sp|Q96FZ5|CKLF7_HUMAN CKLF-like MARVEL transmembrane domain-containing protein 7 OS=Homo sapiens OX=9606 GN=CMTM7 PE=2 SV=1	1	1.56133e-05	1.09055e-05	0.37793	1	1.43169	0.517723
CMTR1	Q8N1G2	sp|Q8N1G2|CMTR1_HUMAN Cap-specific mRNA (nucleoside-2-O-)-methyltransferase 1 OS=Homo sapiens OX=9606 GN=CMTR1 PE=1 SV=1	6	5.0619e-06	1.49282e-06	0.100746	1	3.39084	1.76164
CNBP	P62633	sp|P62633|CNBP_HUMAN Cellular nucleic acid-binding protein OS=Homo sapiens OX=9606 GN=CNBP PE=1 SV=1	5	9.04976e-05	1.29906e-05	0.0185654	2	6.96637	2.80041
CNDP2	Q96KP4	sp|Q96KP4|CNDP2_HUMAN Cytosolic non-specific dipeptidase OS=Homo sapiens OX=9606 GN=CNDP2 PE=1 SV=2	14	8.55252e-05	5.01911e-05	0.306402	1	1.70399	0.768918
CNIH4	Q9P003	sp|Q9P003|CNIH4_HUMAN Protein cornichon homolog 4 OS=Homo sapiens OX=9606 GN=CNIH4 PE=1 SV=1	1	0.000268509	0.000204824	0.415994	1	1.31093	0.390588
CNN2	Q99439	sp|Q99439|CNN2_HUMAN Calponin-2 OS=Homo sapiens OX=9606 GN=CNN2 PE=1 SV=4	6	0.000197901	0.000150204	0.413793	1	1.31755	0.397856
CNN3	Q15417	sp|Q15417|CNN3_HUMAN Calponin-3 OS=Homo sapiens OX=9606 GN=CNN3 PE=1 SV=1	12	0.000397792	0.000324766	0.445896	1	1.22486	0.292613
CNOT1	A5YKK6	sp|A5YKK6|CNOT1_HUMAN CCR4-NOT transcription complex subunit 1 OS=Homo sapiens OX=9606 GN=CNOT1 PE=1 SV=2	16	3.33151e-06	4.04112e-06	0.334361	1	0.824401	-0.278582
CNOT10	Q9H9A5	sp|Q9H9A5|CNO10_HUMAN CCR4-NOT transcription complex subunit 10 OS=Homo sapiens OX=9606 GN=CNOT10 PE=1 SV=1	3	1.82984e-06	6.15394e-08	0.000103274	4	29.7344	4.89406
CNOT11	Q9UKZ1	sp|Q9UKZ1|CNO11_HUMAN CCR4-NOT transcription complex subunit 11 OS=Homo sapiens OX=9606 GN=CNOT11 PE=1 SV=1	1	2.80443e-06	6.15394e-08	1.3983e-05	4	45.5713	5.51005
CNOT2	Q9NZN8	sp|Q9NZN8|CNOT2_HUMAN CCR4-NOT transcription complex subunit 2 OS=Homo sapiens OX=9606 GN=CNOT2 PE=1 SV=1	2	3.31659e-08	5.53578e-06	2.68501e-16	4	0.00599118	-7.38294
CNOT7	Q9UIV1	sp|Q9UIV1|CNOT7_HUMAN CCR4-NOT transcription complex subunit 7 OS=Homo sapiens OX=9606 GN=CNOT7 PE=1 SV=3	2	3.31659e-08	6.15394e-08	0.137773	1	0.538937	-0.891812
CNOT9	Q92600	sp|Q92600|CNOT9_HUMAN CCR4-NOT transcription complex subunit 9 OS=Homo sapiens OX=9606 GN=CNOT9 PE=1 SV=1	1	2.36686e-06	1.82681e-06	0.421134	1	1.29563	0.373649
CNP	P09543	sp|P09543|CN37_HUMAN 2,3-cyclic-nucleotide 3-phosphodiesterase OS=Homo sapiens OX=9606 GN=CNP PE=1 SV=2	15	6.3945e-05	9.30011e-05	0.238615	1	0.687572	-0.540417
CNPY2	Q9Y2B0	sp|Q9Y2B0|CNPY2_HUMAN Protein canopy homolog 2 OS=Homo sapiens OX=9606 GN=CNPY2 PE=1 SV=1	7	4.82322e-05	5.11137e-05	0.413955	1	0.943626	-0.083713
CNPY3	Q9BT09	sp|Q9BT09|CNPY3_HUMAN Protein canopy homolog 3 OS=Homo sapiens OX=9606 GN=CNPY3 PE=1 SV=1	6	4.12709e-05	5.03756e-05	0.330821	1	0.819263	-0.287601
COA3	Q9Y2R0	sp|Q9Y2R0|COA3_HUMAN Cytochrome c oxidase assembly factor 3 homolog, mitochondrial OS=Homo sapiens OX=9606 GN=COA3 PE=1 SV=1	3	0.000120332	0.000146145	0.333655	1	0.823376	-0.280377
COA4	Q9NYJ1	sp|Q9NYJ1|COA4_HUMAN Cytochrome c oxidase assembly factor 4 homolog, mitochondrial OS=Homo sapiens OX=9606 GN=COA4 PE=1 SV=2	2	1.84973e-05	6.15394e-08	1.45248e-10	4	300.576	8.23159
COA6	Q5JTJ3	sp|Q5JTJ3|COA6_HUMAN Cytochrome c oxidase assembly factor 6 homolog OS=Homo sapiens OX=9606 GN=COA6 PE=1 SV=1	3	2.32708e-05	2.47265e-05	0.412346	1	0.941129	-0.0875363
COA7	Q96BR5	sp|Q96BR5|COA7_HUMAN Cytochrome c oxidase assembly factor 7 OS=Homo sapiens OX=9606 GN=COA7 PE=1 SV=2	1	3.31659e-08	2.58337e-06	2.33967e-12	4	0.0128382	-6.28341
COASY	Q13057	sp|Q13057|COASY_HUMAN Bifunctional coenzyme A synthase OS=Homo sapiens OX=9606 GN=COASY PE=1 SV=4	5	8.54258e-06	7.45485e-06	0.475536	1	1.14591	0.196491
COG1	Q8WTW3	sp|Q8WTW3|COG1_HUMAN Conserved oligomeric Golgi complex subunit 1 OS=Homo sapiens OX=9606 GN=COG1 PE=1 SV=1	1	3.31659e-08	6.15394e-08	0.137773	1	0.538937	-0.891812
COG3	Q96JB2	sp|Q96JB2|COG3_HUMAN Conserved oligomeric Golgi complex subunit 3 OS=Homo sapiens OX=9606 GN=COG3 PE=1 SV=3	1	3.31659e-08	2.23277e-06	1.13384e-11	4	0.0148542	-6.07299
COG6	Q9Y2V7	sp|Q9Y2V7|COG6_HUMAN Conserved oligomeric Golgi complex subunit 6 OS=Homo sapiens OX=9606 GN=COG6 PE=1 SV=2	1	3.31659e-08	6.15394e-08	0.137773	1	0.538937	-0.891812
COIL	P38432	sp|P38432|COIL_HUMAN Coilin OS=Homo sapiens OX=9606 GN=COIL PE=1 SV=1	3	5.49947e-06	4.53934e-06	0.450753	1	1.21151	0.276809
COL12A1	Q99715	sp|Q99715|COCA1_HUMAN Collagen alpha-1(XII) chain OS=Homo sapiens OX=9606 GN=COL12A1 PE=1 SV=2	14	2.31714e-06	3.91195e-06	0.172796	1	0.592322	-0.755546
COL13A1	Q5TAT6	sp|Q5TAT6|CODA1_HUMAN Collagen alpha-1(XIII) chain OS=Homo sapiens OX=9606 GN=COL13A1 PE=1 SV=1	2	3.40112e-06	6.27389e-06	0.139795	1	0.542107	-0.88335
COL4A2	P08572	sp|P08572|CO4A2_HUMAN Collagen alpha-2(IV) chain OS=Homo sapiens OX=9606 GN=COL4A2 PE=1 SV=4	3	1.0442e-06	2.43574e-06	0.0739423	1	0.4287	-1.22196
COL4A3BP	Q9Y5P4	sp|Q9Y5P4|C43BP_HUMAN Collagen type IV alpha-3-binding protein OS=Homo sapiens OX=9606 GN=COL4A3BP PE=1 SV=1	2	3.31659e-08	6.15394e-08	0.137773	1	0.538937	-0.891812
COL5A1	P20908	sp|P20908|CO5A1_HUMAN Collagen alpha-1(V) chain OS=Homo sapiens OX=9606 GN=COL5A1 PE=1 SV=3	4	8.7912e-07	1.36549e-06	0.208035	1	0.643811	-0.635291
COL6A1	P12109	sp|P12109|CO6A1_HUMAN Collagen alpha-1(VI) chain OS=Homo sapiens OX=9606 GN=COL6A1 PE=1 SV=3	6	3.74919e-06	5.86793e-06	0.204651	1	0.638928	-0.646274
COL7A1	Q02388	sp|Q02388|CO7A1_HUMAN Collagen alpha-1(VII) chain OS=Homo sapiens OX=9606 GN=COL7A1 PE=1 SV=2	1	3.31659e-08	6.15394e-08	0.137773	1	0.538937	-0.891812
COL8A1	P27658	sp|P27658|CO8A1_HUMAN Collagen alpha-1(VIII) chain OS=Homo sapiens OX=9606 GN=COL8A1 PE=1 SV=2	4	8.87075e-06	5.97865e-06	0.362815	1	1.48374	0.569238
COLGALT1	Q8NBJ5	sp|Q8NBJ5|GT251_HUMAN Procollagen galactosyltransferase 1 OS=Homo sapiens OX=9606 GN=COLGALT1 PE=1 SV=1	19	0.000169061	0.000202979	0.340202	1	0.832902	-0.263781
COMMD10	Q9Y6G5	sp|Q9Y6G5|COMDA_HUMAN COMM domain-containing protein 10 OS=Homo sapiens OX=9606 GN=COMMD10 PE=1 SV=1	2	1.80001e-05	6.15394e-08	1.76822e-10	4	292.496	8.19228
COMMD3	Q9UBI1	sp|Q9UBI1|COMD3_HUMAN COMM domain-containing protein 3 OS=Homo sapiens OX=9606 GN=COMMD3 PE=1 SV=1	1	1.01437e-05	7.34414e-06	0.393321	1	1.38119	0.465917
COMMD4	Q9H0A8	sp|Q9H0A8|COMD4_HUMAN COMM domain-containing protein 4 OS=Homo sapiens OX=9606 GN=COMMD4 PE=1 SV=1	2	1.34255e-05	7.91617e-06	0.308265	1	1.69596	0.762098
COMMD7	Q86VX2	sp|Q86VX2|COMD7_HUMAN COMM domain-containing protein 7 OS=Homo sapiens OX=9606 GN=COMMD7 PE=1 SV=2	1	2.37681e-06	2.36193e-06	0.453365	1	1.0063	0.00905499
COMMD9	Q9P000	sp|Q9P000|COMD9_HUMAN COMM domain-containing protein 9 OS=Homo sapiens OX=9606 GN=COMMD9 PE=1 SV=2	3	3.31659e-08	6.10781e-06	7.52668e-17	4	0.00543007	-7.52481
COMT	P21964	sp|P21964|COMT_HUMAN Catechol O-methyltransferase OS=Homo sapiens OX=9606 GN=COMT PE=1 SV=2	9	8.53263e-05	7.86081e-05	0.499751	1	1.08546	0.118312
COPA	P53621	sp|P53621|COPA_HUMAN Coatomer subunit alpha OS=Homo sapiens OX=9606 GN=COPA PE=1 SV=2	45	0.000141216	0.000139686	0.456216	1	1.01095	0.0157139
COPB1	P53618	sp|P53618|COPB_HUMAN Coatomer subunit beta OS=Homo sapiens OX=9606 GN=COPB1 PE=1 SV=3	35	0.000226741	0.000223277	0.459002	1	1.01552	0.022215
COPB2	P35606	sp|P35606|COPB2_HUMAN Coatomer subunit beta OS=Homo sapiens OX=9606 GN=COPB2 PE=1 SV=2	32	0.000168067	0.000121418	0.392384	1	1.3842	0.469052
COPE	O14579	sp|O14579|COPE_HUMAN Coatomer subunit epsilon OS=Homo sapiens OX=9606 GN=COPE PE=1 SV=3	8	0.000144199	0.000201133	0.259272	1	0.716934	-0.480087
COPG1	Q9Y678	sp|Q9Y678|COPG1_HUMAN Coatomer subunit gamma-1 OS=Homo sapiens OX=9606 GN=COPG1 PE=1 SV=1	23	9.08954e-05	0.000113853	0.316351	1	0.79836	-0.324888
COPG2	Q9UBF2	sp|Q9UBF2|COPG2_HUMAN Coatomer subunit gamma-2 OS=Homo sapiens OX=9606 GN=COPG2 PE=1 SV=1	12	1.77017e-05	1.37103e-05	0.42266	1	1.29113	0.368631
COPRS	Q9NQ92	sp|Q9NQ92|COPRS_HUMAN Coordinator of PRMT5 and differentiation stimulator OS=Homo sapiens OX=9606 GN=COPRS PE=1 SV=3	1	5.22102e-06	6.15394e-08	5.14511e-07	4	84.8401	6.40668
COPS2	P61201	sp|P61201|CSN2_HUMAN COP9 signalosome complex subunit 2 OS=Homo sapiens OX=9606 GN=COPS2 PE=1 SV=1	9	4.17681e-05	4.15184e-05	0.453192	1	1.00602	0.00865251
COPS3	Q9UNS2	sp|Q9UNS2|CSN3_HUMAN COP9 signalosome complex subunit 3 OS=Homo sapiens OX=9606 GN=COPS3 PE=1 SV=3	8	1.39227e-05	7.58402e-06	0.277736	1	1.83579	0.876405
COPS4	Q9BT78	sp|Q9BT78|CSN4_HUMAN COP9 signalosome complex subunit 4 OS=Homo sapiens OX=9606 GN=COPS4 PE=1 SV=1	8	3.58012e-05	3.02623e-05	0.461325	1	1.18303	0.242489
COPS5	Q92905	sp|Q92905|CSN5_HUMAN COP9 signalosome complex subunit 5 OS=Homo sapiens OX=9606 GN=COPS5 PE=1 SV=4	5	2.43647e-05	2.4542e-06	0.00654401	3	9.92778	3.31147
COPS6	Q7L5N1	sp|Q7L5N1|CSN6_HUMAN COP9 signalosome complex subunit 6 OS=Homo sapiens OX=9606 GN=COPS6 PE=1 SV=1	8	6.54367e-05	5.75721e-05	0.479176	1	1.1366	0.18473
COPS7A	Q9UBW8	sp|Q9UBW8|CSN7A_HUMAN COP9 signalosome complex subunit 7a OS=Homo sapiens OX=9606 GN=COPS7A PE=1 SV=1	2	1.35249e-05	1.35442e-05	0.448612	1	0.998575	-0.00205714
COPS7B	Q9H9Q2	sp|Q9H9Q2|CSN7B_HUMAN COP9 signalosome complex subunit 7b OS=Homo sapiens OX=9606 GN=COPS7B PE=1 SV=1	2	1.21326e-05	5.51733e-06	0.214204	1	2.19901	1.13685
COPS8	Q99627	sp|Q99627|CSN8_HUMAN COP9 signalosome complex subunit 8 OS=Homo sapiens OX=9606 GN=COPS8 PE=1 SV=1	3	6.46411e-05	6.42151e-05	0.453572	1	1.00663	0.00954059
COPZ1	P61923	sp|P61923|COPZ1_HUMAN Coatomer subunit zeta-1 OS=Homo sapiens OX=9606 GN=COPZ1 PE=1 SV=1	6	0.000333151	0.000286015	0.468243	1	1.1648	0.220081
COQ6	Q9Y2Z9	sp|Q9Y2Z9|COQ6_HUMAN Ubiquinone biosynthesis monooxygenase COQ6, mitochondrial OS=Homo sapiens OX=9606 GN=COQ6 PE=1 SV=2	2	3.31659e-08	6.15394e-08	0.137773	1	0.538937	-0.891812
COQ8A	Q8NI60	sp|Q8NI60|COQ8A_HUMAN Atypical kinase COQ8A, mitochondrial OS=Homo sapiens OX=9606 GN=COQ8A PE=1 SV=1	1	9.51717e-07	6.15394e-08	0.00144988	3	15.4651	3.95095
COQ9	O75208	sp|O75208|COQ9_HUMAN Ubiquinone biosynthesis protein COQ9, mitochondrial OS=Homo sapiens OX=9606 GN=COQ9 PE=1 SV=1	1	4.85306e-06	8.35903e-06	0.164932	1	0.580577	-0.784442
CORO1B	Q9BR76	sp|Q9BR76|COR1B_HUMAN Coronin-1B OS=Homo sapiens OX=9606 GN=CORO1B PE=1 SV=1	10	0.000163095	0.00016146	0.455708	1	1.01012	0.0145291
CORO1C	Q9ULV4	sp|Q9ULV4|COR1C_HUMAN Coronin-1C OS=Homo sapiens OX=9606 GN=CORO1C PE=1 SV=1	17	0.000368952	0.000286015	0.423053	1	1.28997	0.367339
CORO2A	Q92828	sp|Q92828|COR2A_HUMAN Coronin-2A OS=Homo sapiens OX=9606 GN=CORO2A PE=1 SV=2	2	3.31659e-08	2.04824e-06	2.8155e-11	4	0.0161924	-5.94854
COTL1	Q14019	sp|Q14019|COTL1_HUMAN Coactosin-like protein OS=Homo sapiens OX=9606 GN=COTL1 PE=1 SV=3	8	0.000317239	0.000341373	0.404691	1	0.929302	-0.105781
COX14	Q96I36	sp|Q96I36|COX14_HUMAN Cytochrome c oxidase assembly protein COX14 OS=Homo sapiens OX=9606 GN=COX14 PE=1 SV=1	2	2.90388e-05	4.09648e-05	0.253596	1	0.708872	-0.496403
COX17	Q14061	sp|Q14061|COX17_HUMAN Cytochrome c oxidase copper chaperone OS=Homo sapiens OX=9606 GN=COX17 PE=1 SV=2	1	6.09616e-05	6.53222e-05	0.407249	1	0.933244	-0.0996741
COX20	Q5RI15	sp|Q5RI15|COX20_HUMAN Cytochrome c oxidase assembly protein COX20, mitochondrial OS=Homo sapiens OX=9606 GN=COX20 PE=1 SV=2	2	6.35472e-05	2.21431e-05	0.137782	1	2.86984	1.52097
COX4I1	P13073	sp|P13073|COX41_HUMAN Cytochrome c oxidase subunit 4 isoform 1, mitochondrial OS=Homo sapiens OX=9606 GN=COX4I1 PE=1 SV=1	7	0.000670279	0.000817451	0.331304	1	0.819963	-0.28637
COX5A	P20674	sp|P20674|COX5A_HUMAN Cytochrome c oxidase subunit 5A, mitochondrial OS=Homo sapiens OX=9606 GN=COX5A PE=1 SV=2	5	0.000333151	0.000300778	0.490713	1	1.10763	0.147477
COX5B	P10606	sp|P10606|COX5B_HUMAN Cytochrome c oxidase subunit 5B, mitochondrial OS=Homo sapiens OX=9606 GN=COX5B PE=1 SV=2	5	0.000138233	0.000570186	0.00975963	3	0.242434	-2.04433
COX6A1	P12074	sp|P12074|CX6A1_HUMAN Cytochrome c oxidase subunit 6A1, mitochondrial OS=Homo sapiens OX=9606 GN=COX6A1 PE=1 SV=4	2	3.31659e-08	0.000109424	1.48928e-37	4	0.000303095	-11.6879
COX6B1	P14854	sp|P14854|CX6B1_HUMAN Cytochrome c oxidase subunit 6B1 OS=Homo sapiens OX=9606 GN=COX6B1 PE=1 SV=2	6	0.000435582	0.000441017	0.441852	1	0.987675	-0.0178916
COX6C	P09669	sp|P09669|COX6C_HUMAN Cytochrome c oxidase subunit 6C OS=Homo sapiens OX=9606 GN=COX6C PE=1 SV=2	3	9.19893e-05	0.000177145	0.12543	1	0.519288	-0.945393
COX7A2	P14406	sp|P14406|CX7A2_HUMAN Cytochrome c oxidase subunit 7A2, mitochondrial OS=Homo sapiens OX=9606 GN=COX7A2 PE=1 SV=1	2	0.000660334	0.000762093	0.363048	1	0.866475	-0.20677
COX7A2L	O14548	sp|O14548|COX7R_HUMAN Cytochrome c oxidase subunit 7A-related protein, mitochondrial OS=Homo sapiens OX=9606 GN=COX7A2L PE=1 SV=2	2	2.15802e-05	6.15394e-08	4.69241e-11	4	350.673	8.45398
COX7C	P15954	sp|P15954|COX7C_HUMAN Cytochrome c oxidase subunit 7C, mitochondrial OS=Homo sapiens OX=9606 GN=COX7C PE=1 SV=1	2	0.000177017	6.15394e-08	4.99264e-19	4	2876.48	11.4901
COX8A	P10176	sp|P10176|COX8A_HUMAN Cytochrome c oxidase subunit 8A, mitochondrial OS=Homo sapiens OX=9606 GN=COX8A PE=1 SV=2	1	3.31659e-08	4.76077e-05	1.0912e-30	4	0.000696649	-10.4873
CPA4	Q9UI42	sp|Q9UI42|CBPA4_HUMAN Carboxypeptidase A4 OS=Homo sapiens OX=9606 GN=CPA4 PE=1 SV=2	2	1.88951e-06	2.06669e-06	0.394872	1	0.914268	-0.129311
CPD	O75976	sp|O75976|CBPD_HUMAN Carboxypeptidase D OS=Homo sapiens OX=9606 GN=CPD PE=1 SV=2	34	5.78787e-05	5.9971e-05	0.427676	1	0.965112	-0.0512324
CPNE1	Q99829	sp|Q99829|CPNE1_HUMAN Copine-1 OS=Homo sapiens OX=9606 GN=CPNE1 PE=1 SV=1	13	0.000285416	0.000276789	0.46847	1	1.03117	0.0442764
CPNE3	O75131	sp|O75131|CPNE3_HUMAN Copine-3 OS=Homo sapiens OX=9606 GN=CPNE3 PE=1 SV=1	13	0.000168067	0.00013046	0.423634	1	1.28826	0.365429
CPNE8	Q86YQ8	sp|Q86YQ8|CPNE8_HUMAN Copine-8 OS=Homo sapiens OX=9606 GN=CPNE8 PE=1 SV=2	2	1.87957e-06	6.15394e-08	9.16741e-05	4	30.5424	4.93274
CPOX	P36551	sp|P36551|HEM6_HUMAN Oxygen-dependent coproporphyrinogen-III oxidase, mitochondrial OS=Homo sapiens OX=9606 GN=CPOX PE=1 SV=3	19	0.000291382	0.000273099	0.48965	1	1.06695	0.0934917
CPPED1	Q9BRF8	sp|Q9BRF8|CPPED_HUMAN Serine/threonine-protein phosphatase CPPED1 OS=Homo sapiens OX=9606 GN=CPPED1 PE=1 SV=3	4	1.34255e-05	3.00778e-06	0.0564378	1	4.46359	2.1582
CPSF1	Q10570	sp|Q10570|CPSF1_HUMAN Cleavage and polyadenylation specificity factor subunit 1 OS=Homo sapiens OX=9606 GN=CPSF1 PE=1 SV=2	11	1.30277e-05	3.17385e-06	0.0679216	1	4.10469	2.03727
CPSF2	Q9P2I0	sp|Q9P2I0|CPSF2_HUMAN Cleavage and polyadenylation specificity factor subunit 2 OS=Homo sapiens OX=9606 GN=CPSF2 PE=1 SV=2	8	2.7746e-06	5.38816e-06	0.122748	1	0.514943	-0.957515
CPSF3	Q9UKF6	sp|Q9UKF6|CPSF3_HUMAN Cleavage and polyadenylation specificity factor subunit 3 OS=Homo sapiens OX=9606 GN=CPSF3 PE=1 SV=1	12	9.2586e-06	1.43561e-05	0.208807	1	0.644923	-0.632801
CPSF4	O95639	sp|O95639|CPSF4_HUMAN Cleavage and polyadenylation specificity factor subunit 4 OS=Homo sapiens OX=9606 GN=CPSF4 PE=1 SV=1	2	3.31659e-08	3.00778e-06	4.27464e-13	4	0.0110267	-6.50285
CPSF6	Q16630	sp|Q16630|CPSF6_HUMAN Cleavage and polyadenylation specificity factor subunit 6 OS=Homo sapiens OX=9606 GN=CPSF6 PE=1 SV=2	9	0.000111382	0.000131383	0.350361	1	0.847766	-0.238262
CPSF7	Q8N684	sp|Q8N684|CPSF7_HUMAN Cleavage and polyadenylation specificity factor subunit 7 OS=Homo sapiens OX=9606 GN=CPSF7 PE=1 SV=1	11	6.31494e-05	7.76855e-05	0.326418	1	0.812886	-0.298875
CPT1A	P50416	sp|P50416|CPT1A_HUMAN Carnitine O-palmitoyltransferase 1, liver isoform OS=Homo sapiens OX=9606 GN=CPT1A PE=1 SV=2	24	0.000179006	0.000148359	0.452566	1	1.20658	0.270918
CPT2	P23786	sp|P23786|CPT2_HUMAN Carnitine O-palmitoyltransferase 2, mitochondrial OS=Homo sapiens OX=9606 GN=CPT2 PE=1 SV=2	8	8.65197e-06	8.08224e-06	0.49171	1	1.07049	0.0982727
CRAT	P43155	sp|P43155|CACP_HUMAN Carnitine O-acetyltransferase OS=Homo sapiens OX=9606 GN=CRAT PE=1 SV=5	17	1.26299e-05	2.23277e-05	0.155064	1	0.565661	-0.82199
CREB1	P16220	sp|P16220|CREB1_HUMAN Cyclic AMP-responsive element-binding protein 1 OS=Homo sapiens OX=9606 GN=CREB1 PE=1 SV=2;sp|P18846|ATF1_HUMAN Cyclic AMP-dependent transcription factor ATF-1 OS=Homo sapiens OX=9606 GN=ATF1 PE=1 SV=2	4	4.41549e-05	3.41373e-05	0.421872	1	1.29345	0.371223
CRISPLD2	Q9H0B8	sp|Q9H0B8|CRLD2_HUMAN Cysteine-rich secretory protein LCCL domain-containing 2 OS=Homo sapiens OX=9606 GN=CRISPLD2 PE=2 SV=1	1	2.17791e-06	6.15394e-08	4.69097e-05	4	35.3905	5.14529
CRK	P46108	sp|P46108|CRK_HUMAN Adapter molecule crk OS=Homo sapiens OX=9606 GN=CRK PE=1 SV=2	4	1.31271e-05	1.73639e-05	0.286753	1	0.756001	-0.403541
CRKL	P46109	sp|P46109|CRKL_HUMAN Crk-like protein OS=Homo sapiens OX=9606 GN=CRKL PE=1 SV=1	8	2.78454e-05	3.8935e-05	0.258035	1	0.715177	-0.483628
CRNKL1	Q9BZJ0	sp|Q9BZJ0|CRNL1_HUMAN Crooked neck-like protein 1 OS=Homo sapiens OX=9606 GN=CRNKL1 PE=1 SV=4	9	4.69394e-06	9.81679e-06	0.100821	1	0.478155	-1.06445
CROCC	Q5TZA2	sp|Q5TZA2|CROCC_HUMAN Rootletin OS=Homo sapiens OX=9606 GN=CROCC PE=1 SV=1	1	8.12489e-06	7.25188e-06	0.485596	1	1.12039	0.163995
CRTAP	O75718	sp|O75718|CRTAP_HUMAN Cartilage-associated protein OS=Homo sapiens OX=9606 GN=CRTAP PE=1 SV=1	16	0.000137238	0.000133043	0.468689	1	1.03153	0.0447853
CRYBG3	Q68DQ2	sp|Q68DQ2|CRBG3_HUMAN Very large A-kinase anchor protein OS=Homo sapiens OX=9606 GN=CRYBG3 PE=1 SV=3	2	3.31659e-08	1.42085e-06	1.09388e-09	4	0.0233423	-5.42091
CRYZ	Q08257	sp|Q08257|QOR_HUMAN Quinone oxidoreductase OS=Homo sapiens OX=9606 GN=CRYZ PE=1 SV=1	3	3.42101e-06	6.15394e-08	5.11693e-06	4	55.5905	5.79677
CS	O75390	sp|O75390|CISY_HUMAN Citrate synthase, mitochondrial OS=Homo sapiens OX=9606 GN=CS PE=1 SV=2	13	0.000180995	0.000346909	0.126949	1	0.521737	-0.938606
CSDE1	O75534	sp|O75534|CSDE1_HUMAN Cold shock domain-containing protein E1 OS=Homo sapiens OX=9606 GN=CSDE1 PE=1 SV=2	20	3.76908e-05	3.83814e-05	0.438313	1	0.982005	-0.0261975
CSE1L	P55060	sp|P55060|XPO2_HUMAN Exportin-2 OS=Homo sapiens OX=9606 GN=CSE1L PE=1 SV=3	42	0.000375913	0.000405957	0.402537	1	0.925992	-0.110929
CSK	P41240	sp|P41240|CSK_HUMAN Tyrosine-protein kinase CSK OS=Homo sapiens OX=9606 GN=CSK PE=1 SV=1	5	2.94366e-06	1.74746e-06	0.310935	1	1.68453	0.752349
CSNK1A1	P48729	sp|P48729|KC1A_HUMAN Casein kinase I isoform alpha OS=Homo sapiens OX=9606 GN=CSNK1A1 PE=1 SV=2	5	8.7912e-06	1.28615e-05	0.235776	1	0.68353	-0.548924
CSNK1D	P48730	sp|P48730|KC1D_HUMAN Casein kinase I isoform delta OS=Homo sapiens OX=9606 GN=CSNK1D PE=1 SV=2;sp|P49674|KC1E_HUMAN Casein kinase I isoform epsilon OS=Homo sapiens OX=9606 GN=CSNK1E PE=1 SV=1	2	1.03426e-06	1.59984e-06	0.209885	1	0.646476	-0.629332
CSNK2A1	P68400	sp|P68400|CSK21_HUMAN Casein kinase II subunit alpha OS=Homo sapiens OX=9606 GN=CSNK2A1 PE=1 SV=1;sp|Q8NEV1|CSK23_HUMAN Casein kinase II subunit alpha 3 OS=Homo sapiens OX=9606 GN=CSNK2A3 PE=1 SV=2	13	0.000388841	0.000169579	0.200786	1	2.29297	1.19722
CSNK2A2	P19784	sp|P19784|CSK22_HUMAN Casein kinase II subunit alpha OS=Homo sapiens OX=9606 GN=CSNK2A2 PE=1 SV=1	10	2.91382e-05	3.87505e-05	0.283905	1	0.751945	-0.4113
CSNK2B	P67870	sp|P67870|CSK2B_HUMAN Casein kinase II subunit beta OS=Homo sapiens OX=9606 GN=CSNK2B PE=1 SV=1	7	0.000191934	0.000125293	0.349477	1	1.53188	0.615306
CSRP1	P21291	sp|P21291|CSRP1_HUMAN Cysteine and glycine-rich protein 1 OS=Homo sapiens OX=9606 GN=CSRP1 PE=1 SV=3	7	6.71273e-05	2.69408e-05	0.175679	1	2.49166	1.31711
CST3	P01034	sp|P01034|CYTC_HUMAN Cystatin-C OS=Homo sapiens OX=9606 GN=CST3 PE=1 SV=1	2	1.91934e-05	3.61671e-05	0.132549	1	0.530688	-0.914065
CSTB	P04080	sp|P04080|CYTB_HUMAN Cystatin-B OS=Homo sapiens OX=9606 GN=CSTB PE=1 SV=2	5	0.000938788	0.000675365	0.39057	1	1.39004	0.475131
CSTF1	Q05048	sp|Q05048|CSTF1_HUMAN Cleavage stimulation factor subunit 1 OS=Homo sapiens OX=9606 GN=CSTF1 PE=1 SV=1	11	2.58565e-05	4.68696e-05	0.145943	1	0.551668	-0.858129
CSTF2	P33240	sp|P33240|CSTF2_HUMAN Cleavage stimulation factor subunit 2 OS=Homo sapiens OX=9606 GN=CSTF2 PE=1 SV=1	3	2.67515e-05	3.24766e-05	0.33389	1	0.823716	-0.279781
CSTF3	Q12996	sp|Q12996|CSTF3_HUMAN Cleavage stimulation factor subunit 3 OS=Homo sapiens OX=9606 GN=CSTF3 PE=1 SV=1	10	6.32489e-05	2.87861e-05	0.214472	1	2.1972	1.13567
CTBP1	Q13363	sp|Q13363|CTBP1_HUMAN C-terminal-binding protein 1 OS=Homo sapiens OX=9606 GN=CTBP1 PE=1 SV=2	6	6.91163e-05	3.41373e-05	0.242172	1	2.02465	1.01768
CTBP2	P56545	sp|P56545|CTBP2_HUMAN C-terminal-binding protein 2 OS=Homo sapiens OX=9606 GN=CTBP2 PE=1 SV=1	4	1.98896e-05	6.40306e-06	0.119186	1	3.10626	1.63518
CTCF	P49711	sp|P49711|CTCF_HUMAN Transcriptional repressor CTCF OS=Homo sapiens OX=9606 GN=CTCF PE=1 SV=1	4	7.74699e-06	5.24054e-06	0.364366	1	1.47828	0.563921
CTNNA1	P35221	sp|P35221|CTNA1_HUMAN Catenin alpha-1 OS=Homo sapiens OX=9606 GN=CTNNA1 PE=1 SV=1	22	7.5481e-05	7.87926e-05	0.423139	1	0.95797	-0.061948
CTNNA2	P26232	sp|P26232|CTNA2_HUMAN Catenin alpha-2 OS=Homo sapiens OX=9606 GN=CTNNA2 PE=1 SV=5	1	1.89946e-06	5.53578e-06	0.0363998	2	0.343123	-1.5432
CTNNB1	P35222	sp|P35222|CTNB1_HUMAN Catenin beta-1 OS=Homo sapiens OX=9606 GN=CTNNB1 PE=1 SV=1	8	2.14807e-05	5.75721e-06	0.0831037	1	3.7311	1.8996
CTNNBL1	Q8WYA6	sp|Q8WYA6|CTBL1_HUMAN Beta-catenin-like protein 1 OS=Homo sapiens OX=9606 GN=CTNNBL1 PE=1 SV=1	8	1.7105e-05	1.48728e-05	0.473911	1	1.15009	0.201745
CTNND1	O60716	sp|O60716|CTND1_HUMAN Catenin delta-1 OS=Homo sapiens OX=9606 GN=CTNND1 PE=1 SV=1	16	2.39669e-05	2.32503e-05	0.468265	1	1.03082	0.0437976
CTPS1	P17812	sp|P17812|PYRG1_HUMAN CTP synthase 1 OS=Homo sapiens OX=9606 GN=CTPS1 PE=1 SV=2	19	9.94479e-05	7.97153e-05	0.437779	1	1.24754	0.319085
CTR9	Q6PD62	sp|Q6PD62|CTR9_HUMAN RNA polymerase-associated protein CTR9 homolog OS=Homo sapiens OX=9606 GN=CTR9 PE=1 SV=1	1	3.31659e-08	1.28615e-06	2.80521e-09	4	0.025787	-5.27721
CTSA	P10619	sp|P10619|PPGB_HUMAN Lysosomal protective protein OS=Homo sapiens OX=9606 GN=CTSA PE=1 SV=2	7	6.83207e-05	5.16673e-05	0.412215	1	1.32232	0.403071
CTSB	P07858	sp|P07858|CATB_HUMAN Cathepsin B OS=Homo sapiens OX=9606 GN=CTSB PE=1 SV=3	8	0.000125304	5.94174e-05	0.228131	1	2.10888	1.07648
CTSC	P53634	sp|P53634|CATC_HUMAN Dipeptidyl peptidase 1 OS=Homo sapiens OX=9606 GN=CTSC PE=1 SV=2	9	4.14698e-05	2.98932e-05	0.391432	1	1.38726	0.472242
CTSD	P07339	sp|P07339|CATD_HUMAN Cathepsin D OS=Homo sapiens OX=9606 GN=CTSD PE=1 SV=1	15	0.00113371	0.000826677	0.396391	1	1.3714	0.455651
CTSL	P07711	sp|P07711|CATL1_HUMAN Cathepsin L1 OS=Homo sapiens OX=9606 GN=CTSL PE=1 SV=2	1	1.10387e-05	9.55845e-06	0.472062	1	1.15486	0.207724
CTSZ	Q9UBR2	sp|Q9UBR2|CATZ_HUMAN Cathepsin Z OS=Homo sapiens OX=9606 GN=CTSZ PE=1 SV=1	7	6.55362e-05	8.35903e-05	0.306364	1	0.784016	-0.351044
CTTN	Q14247	sp|Q14247|SRC8_HUMAN Src substrate cortactin OS=Homo sapiens OX=9606 GN=CTTN PE=1 SV=2	16	0.000154144	9.79834e-05	0.338507	1	1.57317	0.653673
CUL1	Q13616	sp|Q13616|CUL1_HUMAN Cullin-1 OS=Homo sapiens OX=9606 GN=CUL1 PE=1 SV=2	14	1.67072e-05	8.58046e-06	0.25605	1	1.94713	0.961347
CUL2	Q13617	sp|Q13617|CUL2_HUMAN Cullin-2 OS=Homo sapiens OX=9606 GN=CUL2 PE=1 SV=2	8	1.28288e-05	1.55186e-06	0.0114188	2	8.26669	3.04731
CUL3	Q13618	sp|Q13618|CUL3_HUMAN Cullin-3 OS=Homo sapiens OX=9606 GN=CUL3 PE=1 SV=2	4	3.04311e-06	2.58337e-06	0.463237	1	1.17796	0.236293
CUL4A	Q13619	sp|Q13619|CUL4A_HUMAN Cullin-4A OS=Homo sapiens OX=9606 GN=CUL4A PE=1 SV=3	5	5.88732e-06	5.12983e-06	0.474853	1	1.14766	0.1987
CUL4B	Q13620	sp|Q13620|CUL4B_HUMAN Cullin-4B OS=Homo sapiens OX=9606 GN=CUL4B PE=1 SV=4	20	4.15692e-05	3.81969e-05	0.49859	1	1.08829	0.12206
CUL5	Q93034	sp|Q93034|CUL5_HUMAN Cullin-5 OS=Homo sapiens OX=9606 GN=CUL5 PE=1 SV=4	8	1.16354e-05	5.70186e-06	0.239428	1	2.04063	1.02902
CUTA	O60888	sp|O60888|CUTA_HUMAN Protein CutA OS=Homo sapiens OX=9606 GN=CUTA PE=1 SV=2	3	0.000406742	0.000474232	0.357103	1	0.857686	-0.221479
CUX1	Q13948	sp|Q13948|CASP_HUMAN Protein CASP OS=Homo sapiens OX=9606 GN=CUX1 PE=1 SV=2;sp|P39880|CUX1_HUMAN Homeobox protein cut-like 1 OS=Homo sapiens OX=9606 GN=CUX1 PE=1 SV=3	5	4.08731e-06	8.04534e-06	0.118521	1	0.508035	-0.977002
CWC22	Q9HCG8	sp|Q9HCG8|CWC22_HUMAN Pre-mRNA-splicing factor CWC22 homolog OS=Homo sapiens OX=9606 GN=CWC22 PE=1 SV=3	3	3.31659e-08	6.53222e-07	9.11715e-07	4	0.0507727	-4.2998
CWC27	Q6UX04	sp|Q6UX04|CWC27_HUMAN Spliceosome-associated protein CWC27 homolog OS=Homo sapiens OX=9606 GN=CWC27 PE=1 SV=1	2	2.08841e-06	6.15394e-08	5.69237e-05	4	33.9361	5.08475
CWF19L1	Q69YN2	sp|Q69YN2|C19L1_HUMAN CWF19-like protein 1 OS=Homo sapiens OX=9606 GN=CWF19L1 PE=1 SV=2	2	2.70498e-06	1.09793e-06	0.178965	1	2.46371	1.30083
CYB561D2	O14569	sp|O14569|C56D2_HUMAN Cytochrome b561 domain-containing protein 2 OS=Homo sapiens OX=9606 GN=CYB561D2 PE=1 SV=1	1	2.03868e-05	4.2441e-05	0.102092	1	0.480357	-1.05782
CYB5A	P00167	sp|P00167|CYB5_HUMAN Cytochrome b5 OS=Homo sapiens OX=9606 GN=CYB5A PE=1 SV=2	5	0.000214807	0.00031923	0.228317	1	0.672892	-0.571553
CYB5B	O43169	sp|O43169|CYB5B_HUMAN Cytochrome b5 type B OS=Homo sapiens OX=9606 GN=CYB5B PE=1 SV=3	5	0.000553925	0.000660603	0.344045	1	0.838514	-0.254094
CYB5R1	Q9UHQ9	sp|Q9UHQ9|NB5R1_HUMAN NADH-cytochrome b5 reductase 1 OS=Homo sapiens OX=9606 GN=CYB5R1 PE=1 SV=1	11	9.36799e-05	0.000122156	0.294386	1	0.766886	-0.382916
CYB5R3	P00387	sp|P00387|NB5R3_HUMAN NADH-cytochrome b5 reductase 3 OS=Homo sapiens OX=9606 GN=CYB5R3 PE=1 SV=3	15	0.000814478	0.000861737	0.414941	1	0.945159	-0.0813709
CYBC1	Q9BQA9	sp|Q9BQA9|CYBC1_HUMAN Cytochrome b-245 chaperone 1 OS=Homo sapiens OX=9606 GN=CYBC1 PE=1 SV=1	2	6.65307e-06	5.53578e-06	0.454316	1	1.20183	0.265232
CYBRD1	Q53TN4	sp|Q53TN4|CYBR1_HUMAN Cytochrome b reductase 1 OS=Homo sapiens OX=9606 GN=CYBRD1 PE=1 SV=1	2	3.59007e-05	3.52445e-05	0.460888	1	1.01862	0.0266144
CYC1	P08574	sp|P08574|CY1_HUMAN Cytochrome c1, heme protein, mitochondrial OS=Homo sapiens OX=9606 GN=CYC1 PE=1 SV=3	8	0.000197901	0.000126954	0.342265	1	1.55884	0.640476
CYCS	P99999	sp|P99999|CYC_HUMAN Cytochrome c OS=Homo sapiens OX=9606 GN=CYCS PE=1 SV=2	3	0.000122321	0.00014596	0.343724	1	0.838043	-0.254903
CYFIP1	Q7L576	sp|Q7L576|CYFP1_HUMAN Cytoplasmic FMR1-interacting protein 1 OS=Homo sapiens OX=9606 GN=CYFIP1 PE=1 SV=1	15	3.69946e-05	3.24766e-05	0.47819	1	1.13912	0.187915
CYFIP2	Q96F07	sp|Q96F07|CYFP2_HUMAN Cytoplasmic FMR1-interacting protein 2 OS=Homo sapiens OX=9606 GN=CYFIP2 PE=1 SV=2	1	3.68952e-06	4.48398e-06	0.333274	1	0.822821	-0.281349
CYP20A1	Q6UW02	sp|Q6UW02|CP20A_HUMAN Cytochrome P450 20A1 OS=Homo sapiens OX=9606 GN=CYP20A1 PE=1 SV=1	6	2.56576e-06	1.88217e-06	0.398987	1	1.36319	0.44699
CYP51A1	Q16850	sp|Q16850|CP51A_HUMAN Lanosterol 14-alpha demethylase OS=Homo sapiens OX=9606 GN=CYP51A1 PE=1 SV=3	5	3.31659e-08	6.15394e-08	0.137773	1	0.538937	-0.891812
CZIB	Q9NWV4	sp|Q9NWV4|CZIB_HUMAN CXXC motif containing zinc binding protein OS=Homo sapiens OX=9606 GN=CZIB PE=1 SV=1	3	2.44642e-05	1.23448e-05	0.249736	1	1.98174	0.986768
DAD1	P61803	sp|P61803|DAD1_HUMAN Dolichyl-diphosphooligosaccharide--protein glycosyltransferase subunit DAD1 OS=Homo sapiens OX=9606 GN=DAD1 PE=1 SV=3	4	0.000548952	0.000719652	0.291525	1	0.762803	-0.390618
DAG1	Q14118	sp|Q14118|DAG1_HUMAN Dystroglycan OS=Homo sapiens OX=9606 GN=DAG1 PE=1 SV=2	5	6.89174e-06	4.18874e-06	0.320325	1	1.6453	0.718351
DAGLB	Q8NCG7	sp|Q8NCG7|DGLB_HUMAN Sn1-specific diacylglycerol lipase beta OS=Homo sapiens OX=9606 GN=DAGLB PE=1 SV=2	7	1.9989e-05	1.10716e-05	0.284037	1	1.80544	0.852349
DAP3	P51398	sp|P51398|RT29_HUMAN 28S ribosomal protein S29, mitochondrial OS=Homo sapiens OX=9606 GN=DAP3 PE=1 SV=1	12	3.16244e-05	9.20785e-05	0.0365187	2	0.343451	-1.54182
DARS	P14868	sp|P14868|SYDC_HUMAN Aspartate--tRNA ligase, cytoplasmic OS=Homo sapiens OX=9606 GN=DARS PE=1 SV=2	30	0.000293371	0.000234348	0.436252	1	1.25186	0.324075
DARS2	Q6PI48	sp|Q6PI48|SYDM_HUMAN Aspartate--tRNA ligase, mitochondrial OS=Homo sapiens OX=9606 GN=DARS2 PE=1 SV=1	6	7.31937e-06	6.62449e-06	0.491818	1	1.1049	0.14391
DAXX	Q9UER7	sp|Q9UER7|DAXX_HUMAN Death domain-associated protein 6 OS=Homo sapiens OX=9606 GN=DAXX PE=1 SV=2	2	2.21769e-06	6.15394e-08	4.31258e-05	4	36.0369	5.1714
DAZAP1	Q96EP5	sp|Q96EP5|DAZP1_HUMAN DAZ-associated protein 1 OS=Homo sapiens OX=9606 GN=DAZAP1 PE=1 SV=1	5	0.000144199	4.76077e-05	0.124907	1	3.02891	1.5988
DBI	P07108	sp|P07108|ACBP_HUMAN Acyl-CoA-binding protein OS=Homo sapiens OX=9606 GN=DBI PE=1 SV=2	5	0.000370941	0.00045947	0.322569	1	0.807323	-0.308782
DBN1	Q16643	sp|Q16643|DREB_HUMAN Drebrin OS=Homo sapiens OX=9606 GN=DBN1 PE=1 SV=4	13	7.00113e-05	8.08224e-05	0.362887	1	0.866236	-0.207167
DBNL	Q9UJU6	sp|Q9UJU6|DBNL_HUMAN Drebrin-like protein OS=Homo sapiens OX=9606 GN=DBNL PE=1 SV=1	10	4.89284e-05	3.72743e-05	0.415418	1	1.31266	0.392491
DBT	P11182	sp|P11182|ODB2_HUMAN Lipoamide acyltransferase component of branched-chain alpha-keto acid dehydrogenase complex, mitochondrial OS=Homo sapiens OX=9606 GN=DBT PE=1 SV=3	6	3.52046e-06	1.05549e-05	0.0330133	2	0.333538	-1.58408
DCAF1	Q9Y4B6	sp|Q9Y4B6|DCAF1_HUMAN DDB1- and CUL4-associated factor 1 OS=Homo sapiens OX=9606 GN=DCAF1 PE=1 SV=3	1	5.02212e-07	6.75365e-07	0.278051	1	0.743615	-0.427372
DCAF13	Q9NV06	sp|Q9NV06|DCA13_HUMAN DDB1- and CUL4-associated factor 13 OS=Homo sapiens OX=9606 GN=DCAF13 PE=1 SV=2	7	9.04976e-06	1.19573e-05	0.287342	1	0.75684	-0.401939
DCAF7	P61962	sp|P61962|DCAF7_HUMAN DDB1- and CUL4-associated factor 7 OS=Homo sapiens OX=9606 GN=DCAF7 PE=1 SV=1	4	2.37681e-06	6.15394e-08	3.11409e-05	4	38.6225	5.27137
DCAF8	Q5TAQ9	sp|Q5TAQ9|DCAF8_HUMAN DDB1- and CUL4-associated factor 8 OS=Homo sapiens OX=9606 GN=DCAF8 PE=1 SV=1	2	1.09393e-06	6.15394e-08	0.000861448	4	17.776	4.15186
DCAKD	Q8WVC6	sp|Q8WVC6|DCAKD_HUMAN Dephospho-CoA kinase domain-containing protein OS=Homo sapiens OX=9606 GN=DCAKD PE=1 SV=1	2	3.42101e-06	6.15394e-08	5.11693e-06	4	55.5905	5.79677
DCBLD2	Q96PD2	sp|Q96PD2|DCBD2_HUMAN Discoidin, CUB and LCCL domain-containing protein 2 OS=Homo sapiens OX=9606 GN=DCBLD2 PE=1 SV=1	2	3.31659e-08	6.15394e-08	0.137773	1	0.538937	-0.891812
DCK	P27707	sp|P27707|DCK_HUMAN Deoxycytidine kinase OS=Homo sapiens OX=9606 GN=DCK PE=1 SV=1	3	2.34697e-05	1.12376e-05	0.231436	1	2.08849	1.06246
DCPS	Q96C86	sp|Q96C86|DCPS_HUMAN m7GpppX diphosphatase OS=Homo sapiens OX=9606 GN=DCPS PE=1 SV=2	5	3.51051e-05	1.88217e-05	0.271807	1	1.86514	0.899287
DCTD	P32321	sp|P32321|DCTD_HUMAN Deoxycytidylate deaminase OS=Homo sapiens OX=9606 GN=DCTD PE=1 SV=2	2	1.621e-05	7.62093e-06	0.225237	1	2.12704	1.08885
DCTN1	Q14203	sp|Q14203|DCTN1_HUMAN Dynactin subunit 1 OS=Homo sapiens OX=9606 GN=DCTN1 PE=1 SV=3	24	2.70498e-05	2.62027e-05	0.46917	1	1.03233	0.0459039
DCTN2	Q13561	sp|Q13561|DCTN2_HUMAN Dynactin subunit 2 OS=Homo sapiens OX=9606 GN=DCTN2 PE=1 SV=4	14	0.000148177	0.0001109	0.407687	1	1.33613	0.418064
DCTN3	O75935	sp|O75935|DCTN3_HUMAN Dynactin subunit 3 OS=Homo sapiens OX=9606 GN=DCTN3 PE=1 SV=1	5	3.00333e-05	6.15394e-08	3.77056e-12	4	488.033	8.93083
DCTN4	Q9UJW0	sp|Q9UJW0|DCTN4_HUMAN Dynactin subunit 4 OS=Homo sapiens OX=9606 GN=DCTN4 PE=1 SV=1	4	1.26299e-05	1.05364e-05	0.45548	1	1.19869	0.261454
DCTN5	Q9BTE1	sp|Q9BTE1|DCTN5_HUMAN Dynactin subunit 5 OS=Homo sapiens OX=9606 GN=DCTN5 PE=1 SV=1	1	1.98896e-05	1.97443e-05	0.454016	1	1.00736	0.0105774
DCTPP1	Q9H773	sp|Q9H773|DCTP1_HUMAN dCTP pyrophosphatase 1 OS=Homo sapiens OX=9606 GN=DCTPP1 PE=1 SV=1	2	8.81108e-06	8.98642e-06	0.437363	1	0.980489	-0.0284269
DCUN1D5	Q9BTE7	sp|Q9BTE7|DCNL5_HUMAN DCN1-like protein 5 OS=Homo sapiens OX=9606 GN=DCUN1D5 PE=1 SV=1	3	5.59892e-06	4.28101e-05	0.00048798	4	0.130785	-2.93473
DCXR	Q7Z4W1	sp|Q7Z4W1|DCXR_HUMAN L-xylulose reductase OS=Homo sapiens OX=9606 GN=DCXR PE=1 SV=2	8	1.56133e-05	9.30011e-06	0.312279	1	1.67883	0.747457
DDAH1	O94760	sp|O94760|DDAH1_HUMAN N(G),N(G)-dimethylarginine dimethylaminohydrolase 1 OS=Homo sapiens OX=9606 GN=DDAH1 PE=1 SV=3	11	8.15473e-05	5.05601e-05	0.328348	1	1.61288	0.689636
DDAH2	O95865	sp|O95865|DDAH2_HUMAN N(G),N(G)-dimethylarginine dimethylaminohydrolase 2 OS=Homo sapiens OX=9606 GN=DDAH2 PE=1 SV=1	5	1.98896e-05	6.93818e-06	0.138054	1	2.86669	1.51938
DDB1	Q16531	sp|Q16531|DDB1_HUMAN DNA damage-binding protein 1 OS=Homo sapiens OX=9606 GN=DDB1 PE=1 SV=1	28	8.3934e-05	8.32213e-05	0.454755	1	1.00856	0.0123037
DDOST	P39656	sp|P39656|OST48_HUMAN Dolichyl-diphosphooligosaccharide--protein glycosyltransferase 48 kDa subunit OS=Homo sapiens OX=9606 GN=DDOST PE=1 SV=4	16	0.000686191	0.000649532	0.483498	1	1.05644	0.0792091
DDRGK1	Q96HY6	sp|Q96HY6|DDRGK_HUMAN DDRGK domain-containing protein 1 OS=Homo sapiens OX=9606 GN=DDRGK1 PE=1 SV=2	3	2.5757e-05	1.46329e-05	0.293752	1	1.76021	0.815748
DDT	P30046	sp|P30046|DOPD_HUMAN D-dopachrome decarboxylase OS=Homo sapiens OX=9606 GN=DDT PE=1 SV=3;sp|A6NHG4|DDTL_HUMAN D-dopachrome decarboxylase-like protein OS=Homo sapiens OX=9606 GN=DDTL PE=2 SV=1	4	9.43761e-05	7.95307e-05	0.459962	1	1.18666	0.246908
DDX1	Q92499	sp|Q92499|DDX1_HUMAN ATP-dependent RNA helicase DDX1 OS=Homo sapiens OX=9606 GN=DDX1 PE=1 SV=2	27	0.000128288	0.000111269	0.472803	1	1.15295	0.205329
DDX10	Q13206	sp|Q13206|DDX10_HUMAN Probable ATP-dependent RNA helicase DDX10 OS=Homo sapiens OX=9606 GN=DDX10 PE=1 SV=2	10	6.23538e-06	1.36918e-05	0.0880523	1	0.455409	-1.13477
DDX17	Q92841	sp|Q92841|DDX17_HUMAN Probable ATP-dependent RNA helicase DDX17 OS=Homo sapiens OX=9606 GN=DDX17 PE=1 SV=2	21	0.000170056	0.000160169	0.486602	1	1.06173	0.0864176
DDX18	Q9NVP1	sp|Q9NVP1|DDX18_HUMAN ATP-dependent RNA helicase DDX18 OS=Homo sapiens OX=9606 GN=DDX18 PE=1 SV=2	19	0.000145194	0.000130829	0.489839	1	1.1098	0.150299
DDX19A	Q9NUU7	sp|Q9NUU7|DD19A_HUMAN ATP-dependent RNA helicase DDX19A OS=Homo sapiens OX=9606 GN=DDX19A PE=1 SV=1;sp|Q9UMR2|DD19B_HUMAN ATP-dependent RNA helicase DDX19B OS=Homo sapiens OX=9606 GN=DDX19B PE=1 SV=1	7	1.75028e-05	1.72901e-05	0.457042	1	1.0123	0.0176427
DDX20	Q9UHI6	sp|Q9UHI6|DDX20_HUMAN Probable ATP-dependent RNA helicase DDX20 OS=Homo sapiens OX=9606 GN=DDX20 PE=1 SV=2	5	1.43205e-06	6.15394e-08	0.000295043	4	23.2704	4.54043
DDX21	Q9NR30	sp|Q9NR30|DDX21_HUMAN Nucleolar RNA helicase 2 OS=Homo sapiens OX=9606 GN=DDX21 PE=1 SV=5	37	0.000376908	0.000448398	0.345447	1	0.840564	-0.25057
DDX23	Q9BUQ8	sp|Q9BUQ8|DDX23_HUMAN Probable ATP-dependent RNA helicase DDX23 OS=Homo sapiens OX=9606 GN=DDX23 PE=1 SV=3	14	1.1536e-05	1.17543e-05	0.437949	1	0.981423	-0.0270523
DDX24	Q9GZR7	sp|Q9GZR7|DDX24_HUMAN ATP-dependent RNA helicase DDX24 OS=Homo sapiens OX=9606 GN=DDX24 PE=1 SV=1	14	1.32266e-05	8.28522e-06	0.332516	1	1.59641	0.674827
DDX27	Q96GQ7	sp|Q96GQ7|DDX27_HUMAN Probable ATP-dependent RNA helicase DDX27 OS=Homo sapiens OX=9606 GN=DDX27 PE=1 SV=2	17	3.62985e-05	2.60182e-05	0.389003	1	1.39512	0.480389
DDX31	Q9H8H2	sp|Q9H8H2|DDX31_HUMAN Probable ATP-dependent RNA helicase DDX31 OS=Homo sapiens OX=9606 GN=DDX31 PE=1 SV=2	4	4.3956e-07	6.6983e-07	0.21667	1	0.656226	-0.607735
DDX39A	O00148	sp|O00148|DX39A_HUMAN ATP-dependent RNA helicase DDX39A OS=Homo sapiens OX=9606 GN=DDX39A PE=1 SV=2	6	9.76578e-05	0.000104442	0.408417	1	0.935046	-0.0968908
DDX39B	Q13838	sp|Q13838|DX39B_HUMAN Spliceosome RNA helicase DDX39B OS=Homo sapiens OX=9606 GN=DDX39B PE=1 SV=1	9	0.00109393	0.00103519	0.483674	1	1.05674	0.079619
DDX3X	O00571	sp|O00571|DDX3X_HUMAN ATP-dependent RNA helicase DDX3X OS=Homo sapiens OX=9606 GN=DDX3X PE=1 SV=3;sp|O15523|DDX3Y_HUMAN ATP-dependent RNA helicase DDX3Y OS=Homo sapiens OX=9606 GN=DDX3Y PE=1 SV=2	32	0.00037293	0.000433636	0.358675	1	0.860006	-0.217582
DDX41	Q9UJV9	sp|Q9UJV9|DDX41_HUMAN Probable ATP-dependent RNA helicase DDX41 OS=Homo sapiens OX=9606 GN=DDX41 PE=1 SV=2	6	5.28068e-06	5.09292e-06	0.471889	1	1.03687	0.0522318
DDX42	Q86XP3	sp|Q86XP3|DDX42_HUMAN ATP-dependent RNA helicase DDX42 OS=Homo sapiens OX=9606 GN=DDX42 PE=1 SV=1	17	3.46079e-05	2.63872e-05	0.41579	1	1.31154	0.39126
DDX46	Q7L014	sp|Q7L014|DDX46_HUMAN Probable ATP-dependent RNA helicase DDX46 OS=Homo sapiens OX=9606 GN=DDX46 PE=1 SV=2	30	6.35472e-05	5.11137e-05	0.4393	1	1.24325	0.314118
DDX47	Q9H0S4	sp|Q9H0S4|DDX47_HUMAN Probable ATP-dependent RNA helicase DDX47 OS=Homo sapiens OX=9606 GN=DDX47 PE=1 SV=1	15	5.11162e-05	6.66139e-05	0.294712	1	0.767351	-0.382042
DDX49	Q9Y6V7	sp|Q9Y6V7|DDX49_HUMAN Probable ATP-dependent RNA helicase DDX49 OS=Homo sapiens OX=9606 GN=DDX49 PE=1 SV=1	1	2.01879e-06	6.15394e-08	6.64526e-05	4	32.8049	5.03584
DDX5	P17844	sp|P17844|DDX5_HUMAN Probable ATP-dependent RNA helicase DDX5 OS=Homo sapiens OX=9606 GN=DDX5 PE=1 SV=1	25	0.000491273	0.000583102	0.34678	1	0.842515	-0.247225
DDX50	Q9BQ39	sp|Q9BQ39|DDX50_HUMAN ATP-dependent RNA helicase DDX50 OS=Homo sapiens OX=9606 GN=DDX50 PE=1 SV=1	12	2.81438e-05	2.34348e-05	0.454646	1	1.20094	0.264162
DDX51	Q8N8A6	sp|Q8N8A6|DDX51_HUMAN ATP-dependent RNA helicase DDX51 OS=Homo sapiens OX=9606 GN=DDX51 PE=1 SV=3	7	6.49395e-06	9.15249e-06	0.254057	1	0.709528	-0.495069
DDX52	Q9Y2R4	sp|Q9Y2R4|DDX52_HUMAN Probable ATP-dependent RNA helicase DDX52 OS=Homo sapiens OX=9606 GN=DDX52 PE=1 SV=3	3	5.22102e-06	2.63872e-06	0.250299	1	1.97861	0.98449
DDX54	Q8TDD1	sp|Q8TDD1|DDX54_HUMAN ATP-dependent RNA helicase DDX54 OS=Homo sapiens OX=9606 GN=DDX54 PE=1 SV=2	18	1.7105e-05	1.64966e-05	0.471897	1	1.03688	0.05225
DDX55	Q8NHQ9	sp|Q8NHQ9|DDX55_HUMAN ATP-dependent RNA helicase DDX55 OS=Homo sapiens OX=9606 GN=DDX55 PE=1 SV=3	3	9.29838e-07	1.1699e-06	0.313879	1	0.794804	-0.331328
DDX56	Q9NY93	sp|Q9NY93|DDX56_HUMAN Probable ATP-dependent RNA helicase DDX56 OS=Homo sapiens OX=9606 GN=DDX56 PE=1 SV=1	9	2.21769e-05	5.24054e-06	0.063551	1	4.23179	2.08127
DDX6	P26196	sp|P26196|DDX6_HUMAN Probable ATP-dependent RNA helicase DDX6 OS=Homo sapiens OX=9606 GN=DDX6 PE=1 SV=2	14	8.02545e-05	8.54356e-05	0.411203	1	0.939356	-0.0902553
DECR1	Q16698	sp|Q16698|DECR_HUMAN 2,4-dienoyl-CoA reductase, mitochondrial OS=Homo sapiens OX=9606 GN=DECR1 PE=1 SV=1	12	0.000100442	9.24476e-05	0.499333	1	1.08648	0.119661
DECR2	Q9NUI1	sp|Q9NUI1|DECR2_HUMAN Peroxisomal 2,4-dienoyl-CoA reductase OS=Homo sapiens OX=9606 GN=DECR2 PE=1 SV=1	1	2.44642e-06	2.97087e-06	0.333719	1	0.823469	-0.280214
DEGS1	O15121	sp|O15121|DEGS1_HUMAN Sphingolipid delta(4)-desaturase DES1 OS=Homo sapiens OX=9606 GN=DEGS1 PE=1 SV=1	3	0.000105415	0.000117359	0.384291	1	0.898228	-0.154846
DEK	P35659	sp|P35659|DEK_HUMAN Protein DEK OS=Homo sapiens OX=9606 GN=DEK PE=1 SV=1	21	0.000397792	0.000433636	0.396886	1	0.917339	-0.124473
DENR	O43583	sp|O43583|DENR_HUMAN Density-regulated protein OS=Homo sapiens OX=9606 GN=DENR PE=1 SV=2	8	0.000107404	9.42928e-05	0.478218	1	1.13904	0.187824
DERA	Q9Y315	sp|Q9Y315|DEOC_HUMAN Deoxyribose-phosphate aldolase OS=Homo sapiens OX=9606 GN=DERA PE=1 SV=2	5	3.79891e-06	6.15394e-08	2.95463e-06	4	61.7313	5.94793
DERL1	Q9BUN8	sp|Q9BUN8|DERL1_HUMAN Derlin-1 OS=Homo sapiens OX=9606 GN=DERL1 PE=1 SV=1	5	6.25527e-05	4.9453e-05	0.431685	1	1.26489	0.339015
DERL2	Q9GZP9	sp|Q9GZP9|DERL2_HUMAN Derlin-2 OS=Homo sapiens OX=9606 GN=DERL2 PE=1 SV=1	5	9.22877e-05	0.00011662	0.311475	1	0.79135	-0.337612
DFFA	O00273	sp|O00273|DFFA_HUMAN DNA fragmentation factor subunit alpha OS=Homo sapiens OX=9606 GN=DFFA PE=1 SV=1	4	1.3326e-06	5.18518e-06	0.0123996	2	0.257002	-1.96015
DGAT1	O75907	sp|O75907|DGAT1_HUMAN Diacylglycerol O-acyltransferase 1 OS=Homo sapiens OX=9606 GN=DGAT1 PE=1 SV=2	1	5.32046e-06	6.23698e-06	0.353957	1	0.853051	-0.229296
DGLUCY	Q7Z3D6	sp|Q7Z3D6|GLUCM_HUMAN D-glutamate cyclase, mitochondrial OS=Homo sapiens OX=9606 GN=DGLUCY PE=1 SV=2	1	3.31659e-08	6.15394e-08	0.137773	1	0.538937	-0.891812
DGUOK	Q16854	sp|Q16854|DGUOK_HUMAN Deoxyguanosine kinase, mitochondrial OS=Homo sapiens OX=9606 GN=DGUOK PE=1 SV=2	1	6.85196e-06	1.06102e-05	0.209406	1	0.645787	-0.63087
DHCR24	Q15392	sp|Q15392|DHC24_HUMAN Delta(24)-sterol reductase OS=Homo sapiens OX=9606 GN=DHCR24 PE=1 SV=2	4	4.47516e-06	1.52419e-05	0.0208267	2	0.29361	-1.76803
DHCR7	Q9UBM7	sp|Q9UBM7|DHCR7_HUMAN 7-dehydrocholesterol reductase OS=Homo sapiens OX=9606 GN=DHCR7 PE=1 SV=1	6	0.000128288	0.000138579	0.402371	1	0.925737	-0.111326
DHFR	P00374	sp|P00374|DYR_HUMAN Dihydrofolate reductase OS=Homo sapiens OX=9606 GN=DHFR PE=1 SV=2;sp|Q86XF0|DYR2_HUMAN Dihydrofolate reductase 2, mitochondrial OS=Homo sapiens OX=9606 GN=DHFR2 PE=1 SV=1	2	5.0619e-06	6.15394e-08	6.13224e-07	4	82.2545	6.36202
DHODH	Q02127	sp|Q02127|PYRD_HUMAN Dihydroorotate dehydrogenase (quinone), mitochondrial OS=Homo sapiens OX=9606 GN=DHODH PE=1 SV=3	6	8.16467e-06	1.41347e-05	0.162974	1	0.577633	-0.791774
DHPS	P49366	sp|P49366|DHYS_HUMAN Deoxyhypusine synthase OS=Homo sapiens OX=9606 GN=DHPS PE=1 SV=1	3	8.8807e-06	6.15394e-08	2.1102e-08	4	144.309	7.17302
DHRS1	Q96LJ7	sp|Q96LJ7|DHRS1_HUMAN Dehydrogenase/reductase SDR family member 1 OS=Homo sapiens OX=9606 GN=DHRS1 PE=1 SV=1	2	3.31659e-08	6.15394e-08	0.137773	1	0.538937	-0.891812
DHRS4	Q9BTZ2	sp|Q9BTZ2|DHRS4_HUMAN Dehydrogenase/reductase SDR family member 4 OS=Homo sapiens OX=9606 GN=DHRS4 PE=1 SV=3	3	1.42211e-05	6.10781e-06	0.196006	1	2.32834	1.2193
DHRS7	Q9Y394	sp|Q9Y394|DHRS7_HUMAN Dehydrogenase/reductase SDR family member 7 OS=Homo sapiens OX=9606 GN=DHRS7 PE=1 SV=1	6	2.21769e-05	1.93752e-05	0.476046	1	1.1446	0.194843
DHRS7B	Q6IAN0	sp|Q6IAN0|DRS7B_HUMAN Dehydrogenase/reductase SDR family member 7B OS=Homo sapiens OX=9606 GN=DHRS7B PE=1 SV=2	8	2.02874e-05	2.78634e-05	0.267134	1	0.7281	-0.457791
DHX15	O43143	sp|O43143|DHX15_HUMAN Pre-mRNA-splicing factor ATP-dependent RNA helicase DHX15 OS=Homo sapiens OX=9606 GN=DHX15 PE=1 SV=2	35	0.000334145	0.000374588	0.380177	1	0.892033	-0.16483
DHX16	O60231	sp|O60231|DHX16_HUMAN Pre-mRNA-splicing factor ATP-dependent RNA helicase DHX16 OS=Homo sapiens OX=9606 GN=DHX16 PE=1 SV=2	10	4.76355e-06	1.0887e-05	0.0785022	1	0.437544	-1.1925
DHX29	Q7Z478	sp|Q7Z478|DHX29_HUMAN ATP-dependent RNA helicase DHX29 OS=Homo sapiens OX=9606 GN=DHX29 PE=1 SV=2	12	5.03206e-06	7.03044e-06	0.258441	1	0.715753	-0.482465
DHX30	Q7L2E3	sp|Q7L2E3|DHX30_HUMAN ATP-dependent RNA helicase DHX30 OS=Homo sapiens OX=9606 GN=DHX30 PE=1 SV=1	33	1.65084e-05	2.06669e-05	0.316643	1	0.798781	-0.324127
DHX36	Q9H2U1	sp|Q9H2U1|DHX36_HUMAN ATP-dependent DNA/RNA helicase DHX36 OS=Homo sapiens OX=9606 GN=DHX36 PE=1 SV=2	6	5.45969e-06	2.73099e-06	0.24663	1	1.99916	0.999397
DHX37	Q8IY37	sp|Q8IY37|DHX37_HUMAN Probable ATP-dependent RNA helicase DHX37 OS=Homo sapiens OX=9606 GN=DHX37 PE=1 SV=1	2	3.27184e-07	6.15394e-08	0.0374219	2	5.31665	2.41052
DHX38	Q92620	sp|Q92620|PRP16_HUMAN Pre-mRNA-splicing factor ATP-dependent RNA helicase PRP16 OS=Homo sapiens OX=9606 GN=DHX38 PE=1 SV=2	1	7.98567e-07	6.15394e-08	0.00270522	3	12.9765	3.69783
DHX8	Q14562	sp|Q14562|DHX8_HUMAN ATP-dependent RNA helicase DHX8 OS=Homo sapiens OX=9606 GN=DHX8 PE=1 SV=1	3	1.21326e-06	6.15394e-08	0.000576401	4	19.7152	4.30124
DHX9	Q08211	sp|Q08211|DHX9_HUMAN ATP-dependent RNA helicase A OS=Homo sapiens OX=9606 GN=DHX9 PE=1 SV=4	49	0.000474367	0.000448398	0.484364	1	1.05791	0.0812211
DIABLO	Q9NR28	sp|Q9NR28|DBLOH_HUMAN Diablo homolog, mitochondrial OS=Homo sapiens OX=9606 GN=DIABLO PE=1 SV=1	7	8.91053e-05	0.000335837	0.014087	2	0.265323	-1.91418
DIAPH1	O60610	sp|O60610|DIAP1_HUMAN Protein diaphanous homolog 1 OS=Homo sapiens OX=9606 GN=DIAPH1 PE=1 SV=2	26	5.82765e-05	3.41373e-05	0.305681	1	1.70712	0.771564
DIAPH3	Q9NSV4	sp|Q9NSV4|DIAP3_HUMAN Protein diaphanous homolog 3 OS=Homo sapiens OX=9606 GN=DIAPH3 PE=1 SV=4	3	9.88512e-07	1.93752e-06	0.119837	1	0.510194	-0.970883
DIEXF	Q68CQ4	sp|Q68CQ4|DIEXF_HUMAN Digestive organ expansion factor homolog OS=Homo sapiens OX=9606 GN=DIEXF PE=1 SV=2	5	2.64531e-06	3.1923e-06	0.337286	1	0.828654	-0.271158
DIMT1	Q9UNQ2	sp|Q9UNQ2|DIM1_HUMAN Probable dimethyladenosine transferase OS=Homo sapiens OX=9606 GN=DIMT1 PE=1 SV=1	10	2.31714e-05	4.31791e-05	0.136308	1	0.536634	-0.89799
DIP2B	Q9P265	sp|Q9P265|DIP2B_HUMAN Disco-interacting protein 2 homolog B OS=Homo sapiens OX=9606 GN=DIP2B PE=1 SV=3	1	3.31659e-08	6.15394e-08	0.137773	1	0.538937	-0.891812
DIS3	Q9Y2L1	sp|Q9Y2L1|RRP44_HUMAN Exosome complex exonuclease RRP44 OS=Homo sapiens OX=9606 GN=DIS3 PE=1 SV=2	15	1.5315e-05	8.78344e-06	0.297418	1	1.74362	0.802085
DKC1	O60832	sp|O60832|DKC1_HUMAN H/ACA ribonucleoprotein complex subunit DKC1 OS=Homo sapiens OX=9606 GN=DKC1 PE=1 SV=3	23	0.000179006	0.000158508	0.482047	1	1.12932	0.175455
DKK1	O94907	sp|O94907|DKK1_HUMAN Dickkopf-related protein 1 OS=Homo sapiens OX=9606 GN=DKK1 PE=1 SV=1	2	4.62433e-06	6.15394e-08	1.01717e-06	4	75.1441	6.23159
DLAT	P10515	sp|P10515|ODP2_HUMAN Dihydrolipoyllysine-residue acetyltransferase component of pyruvate dehydrogenase complex, mitochondrial OS=Homo sapiens OX=9606 GN=DLAT PE=1 SV=3	16	9.0597e-05	0.00013618	0.222985	1	0.665273	-0.587982
DLD	P09622	sp|P09622|DLDH_HUMAN Dihydrolipoyl dehydrogenase, mitochondrial OS=Homo sapiens OX=9606 GN=DLD PE=1 SV=2	15	0.000307294	0.000308159	0.447759	1	0.997195	-0.00405309
DLG1	Q12959	sp|Q12959|DLG1_HUMAN Disks large homolog 1 OS=Homo sapiens OX=9606 GN=DLG1 PE=1 SV=2	19	5.71825e-05	6.36615e-05	0.384291	1	0.898228	-0.154846
DLGAP4	Q9Y2H0	sp|Q9Y2H0|DLGP4_HUMAN Disks large-associated protein 4 OS=Homo sapiens OX=9606 GN=DLGAP4 PE=1 SV=3	1	3.31659e-08	6.15394e-08	0.137773	1	0.538937	-0.891812
DLST	P36957	sp|P36957|ODO2_HUMAN Dihydrolipoyllysine-residue succinyltransferase component of 2-oxoglutarate dehydrogenase complex, mitochondrial OS=Homo sapiens OX=9606 GN=DLST PE=1 SV=4	13	0.000168067	0.000226967	0.275853	1	0.74049	-0.433447
DNAAF5	Q86Y56	sp|Q86Y56|DAAF5_HUMAN Dynein assembly factor 5, axonemal OS=Homo sapiens OX=9606 GN=DNAAF5 PE=1 SV=4	8	7.22986e-06	2.82325e-06	0.167862	1	2.56083	1.35661
DNAH1	Q9P2D7	sp|Q9P2D7|DYH1_HUMAN Dynein heavy chain 1, axonemal OS=Homo sapiens OX=9606 GN=DNAH1 PE=1 SV=5	1	3.31659e-08	2.82325e-06	8.73167e-13	4	0.0117474	-6.41151
DNAH3	Q8TD57	sp|Q8TD57|DYH3_HUMAN Dynein heavy chain 3, axonemal OS=Homo sapiens OX=9606 GN=DNAH3 PE=2 SV=1	2	2.9536e-06	6.01555e-07	0.0453015	2	4.90995	2.29571
DNAH9	Q9NYC9	sp|Q9NYC9|DYH9_HUMAN Dynein heavy chain 9, axonemal OS=Homo sapiens OX=9606 GN=DNAH9 PE=1 SV=3;sp|Q9H6R3|ACSS3_HUMAN Acyl-CoA synthetase short-chain family member 3, mitochondrial OS=Homo sapiens OX=9606 GN=ACSS3 PE=1 SV=1	2	3.31659e-08	1.17359e-06	6.5318e-09	4	0.0282603	-5.14508
DNAJA1	P31689	sp|P31689|DNJA1_HUMAN DnaJ homolog subfamily A member 1 OS=Homo sapiens OX=9606 GN=DNAJA1 PE=1 SV=2	17	0.000330167	0.000206669	0.332221	1	1.59756	0.675873
DNAJA2	O60884	sp|O60884|DNJA2_HUMAN DnaJ homolog subfamily A member 2 OS=Homo sapiens OX=9606 GN=DNAJA2 PE=1 SV=1	16	0.000141216	6.95663e-05	0.241259	1	2.02995	1.02144
DNAJA3	Q96EY1	sp|Q96EY1|DNJA3_HUMAN DnaJ homolog subfamily A member 3, mitochondrial OS=Homo sapiens OX=9606 GN=DNAJA3 PE=1 SV=2	7	2.1083e-05	3.78278e-05	0.149623	1	0.55734	-0.843371
DNAJB1	P25685	sp|P25685|DNJB1_HUMAN DnaJ homolog subfamily B member 1 OS=Homo sapiens OX=9606 GN=DNAJB1 PE=1 SV=4	10	0.000110387	8.70963e-05	0.430808	1	1.26742	0.341889
DNAJB11	Q9UBS4	sp|Q9UBS4|DJB11_HUMAN DnaJ homolog subfamily B member 11 OS=Homo sapiens OX=9606 GN=DNAJB11 PE=1 SV=1	9	0.000132266	0.000127692	0.471261	1	1.03582	0.0507705
DNAJB12	Q9NXW2	sp|Q9NXW2|DJB12_HUMAN DnaJ homolog subfamily B member 12 OS=Homo sapiens OX=9606 GN=DNAJB12 PE=1 SV=5	4	1.98896e-05	4.39172e-06	0.0546136	1	4.52888	2.17915
DNAJB4	Q9UDY4	sp|Q9UDY4|DNJB4_HUMAN DnaJ homolog subfamily B member 4 OS=Homo sapiens OX=9606 GN=DNAJB4 PE=1 SV=1	5	3.31659e-08	1.15698e-05	1.10442e-20	4	0.00286659	-8.44645
DNAJB6	O75190	sp|O75190|DNJB6_HUMAN DnaJ homolog subfamily B member 6 OS=Homo sapiens OX=9606 GN=DNAJB6 PE=1 SV=2	10	7.57793e-05	5.03756e-05	0.357049	1	1.50429	0.589078
DNAJC10	Q8IXB1	sp|Q8IXB1|DJC10_HUMAN DnaJ homolog subfamily C member 10 OS=Homo sapiens OX=9606 GN=DNAJC10 PE=1 SV=2	6	1.93923e-06	6.95663e-06	0.0170937	2	0.27876	-1.8429
DNAJC11	Q9NVH1	sp|Q9NVH1|DJC11_HUMAN DnaJ homolog subfamily C member 11 OS=Homo sapiens OX=9606 GN=DNAJC11 PE=1 SV=2	16	2.88399e-05	2.82325e-05	0.462645	1	1.02151	0.0307094
DNAJC13	O75165	sp|O75165|DJC13_HUMAN DnaJ homolog subfamily C member 13 OS=Homo sapiens OX=9606 GN=DNAJC13 PE=1 SV=5	13	1.92929e-06	3.57981e-06	0.137773	1	0.538937	-0.891812
DNAJC19	Q96DA6	sp|Q96DA6|TIM14_HUMAN Mitochondrial import inner membrane translocase subunit TIM14 OS=Homo sapiens OX=9606 GN=DNAJC19 PE=1 SV=3	1	3.65968e-06	7.15961e-06	0.120425	1	0.511157	-0.968163
DNAJC21	Q5F1R6	sp|Q5F1R6|DJC21_HUMAN DnaJ homolog subfamily C member 21 OS=Homo sapiens OX=9606 GN=DNAJC21 PE=1 SV=2	2	3.31659e-08	6.15394e-08	0.137773	1	0.538937	-0.891812
DNAJC3	Q13217	sp|Q13217|DNJC3_HUMAN DnaJ homolog subfamily C member 3 OS=Homo sapiens OX=9606 GN=DNAJC3 PE=1 SV=1	6	8.31385e-06	2.32503e-05	0.0418364	2	0.35758	-1.48366
DNAJC5	Q9H3Z4	sp|Q9H3Z4|DNJC5_HUMAN DnaJ homolog subfamily C member 5 OS=Homo sapiens OX=9606 GN=DNAJC5 PE=1 SV=1	2	2.13813e-05	2.04824e-05	0.476075	1	1.04389	0.0619652
DNAJC7	Q99615	sp|Q99615|DNJC7_HUMAN DnaJ homolog subfamily C member 7 OS=Homo sapiens OX=9606 GN=DNAJC7 PE=1 SV=2	13	2.73482e-05	1.10531e-05	0.177717	1	2.47425	1.30699
DNAJC8	O75937	sp|O75937|DNJC8_HUMAN DnaJ homolog subfamily C member 8 OS=Homo sapiens OX=9606 GN=DNAJC8 PE=1 SV=2	5	4.55471e-05	3.21075e-05	0.381856	1	1.41858	0.504448
DNAJC9	Q8WXX5	sp|Q8WXX5|DNJC9_HUMAN DnaJ homolog subfamily C member 9 OS=Homo sapiens OX=9606 GN=DNAJC9 PE=1 SV=1	10	7.97572e-05	4.6316e-05	0.302274	1	1.72202	0.784103
DNHD1	Q96M86	sp|Q96M86|DNHD1_HUMAN Dynein heavy chain domain-containing protein 1 OS=Homo sapiens OX=9606 GN=DNHD1 PE=2 SV=2	2	3.31659e-08	6.15394e-08	0.137773	1	0.538937	-0.891812
DNM1	Q05193	sp|Q05193|DYN1_HUMAN Dynamin-1 OS=Homo sapiens OX=9606 GN=DNM1 PE=1 SV=2	3	4.50499e-07	1.3821e-06	0.0304585	2	0.325952	-1.61727
DNM1L	O00429	sp|O00429|DNM1L_HUMAN Dynamin-1-like protein OS=Homo sapiens OX=9606 GN=DNM1L PE=1 SV=2	18	4.66411e-05	3.22921e-05	0.374186	1	1.44435	0.530421
DNM2	P50570	sp|P50570|DYN2_HUMAN Dynamin-2 OS=Homo sapiens OX=9606 GN=DNM2 PE=1 SV=2	20	0.000109393	8.89416e-05	0.444063	1	1.22994	0.298587
DNMBP	Q6XZF7	sp|Q6XZF7|DNMBP_HUMAN Dynamin-binding protein OS=Homo sapiens OX=9606 GN=DNMBP PE=1 SV=1	13	6.34478e-05	2.23277e-06	0.000126077	4	28.4167	4.82867
DNMT1	P26358	sp|P26358|DNMT1_HUMAN DNA (cytosine-5)-methyltransferase 1 OS=Homo sapiens OX=9606 GN=DNMT1 PE=1 SV=2	23	5.88732e-05	3.1923e-05	0.276017	1	1.84422	0.883013
DNPEP	Q9ULA0	sp|Q9ULA0|DNPEP_HUMAN Aspartyl aminopeptidase OS=Homo sapiens OX=9606 GN=DNPEP PE=1 SV=1	6	2.63537e-05	1.26769e-05	0.233016	1	2.07887	1.0558
DNPH1	O43598	sp|O43598|DNPH1_HUMAN 2-deoxynucleoside 5-phosphate N-hydrolase 1 OS=Homo sapiens OX=9606 GN=DNPH1 PE=1 SV=1	1	1.44199e-05	6.15394e-08	8.4728e-10	4	234.32	7.87234
DNTTIP1	Q9H147	sp|Q9H147|TDIF1_HUMAN Deoxynucleotidyltransferase terminal-interacting protein 1 OS=Homo sapiens OX=9606 GN=DNTTIP1 PE=1 SV=2	3	3.92819e-06	7.45485e-06	0.13019	1	0.526931	-0.924314
DNTTIP2	Q5QJE6	sp|Q5QJE6|TDIF2_HUMAN Deoxynucleotidyltransferase terminal-interacting protein 2 OS=Homo sapiens OX=9606 GN=DNTTIP2 PE=1 SV=2	3	4.42543e-06	3.13694e-06	0.384225	1	1.41075	0.496459
DOCK7	Q96N67	sp|Q96N67|DOCK7_HUMAN Dedicator of cytokinesis protein 7 OS=Homo sapiens OX=9606 GN=DOCK7 PE=1 SV=4	21	1.00442e-05	6.01555e-06	0.314443	1	1.66971	0.7396
DOCK9	Q9BZ29	sp|Q9BZ29|DOCK9_HUMAN Dedicator of cytokinesis protein 9 OS=Homo sapiens OX=9606 GN=DOCK9 PE=1 SV=2	8	1.42211e-06	8.45129e-07	0.311365	1	1.68271	0.750784
DOHH	Q9BU89	sp|Q9BU89|DOHH_HUMAN Deoxyhypusine hydroxylase OS=Homo sapiens OX=9606 GN=DOHH PE=1 SV=1	2	1.18343e-05	6.15394e-08	3.25337e-09	4	192.304	7.58725
DOLPP1	Q86YN1	sp|Q86YN1|DOPP1_HUMAN Dolichyldiphosphatase 1 OS=Homo sapiens OX=9606 GN=DOLPP1 PE=2 SV=1	3	1.5315e-06	2.98932e-05	9.77477e-07	4	0.0512323	-4.2868
DPAGT1	Q9H3H5	sp|Q9H3H5|GPT_HUMAN UDP-N-acetylglucosamine--dolichyl-phosphate N-acetylglucosaminephosphotransferase OS=Homo sapiens OX=9606 GN=DPAGT1 PE=1 SV=2	2	1.35249e-05	6.15394e-08	1.31758e-09	4	219.776	7.77989
DPF2	Q92785	sp|Q92785|REQU_HUMAN Zinc finger protein ubi-d4 OS=Homo sapiens OX=9606 GN=DPF2 PE=1 SV=2	7	7.53815e-06	1.35073e-05	0.150105	1	0.558079	-0.841458
DPM1	O60762	sp|O60762|DPM1_HUMAN Dolichol-phosphate mannosyltransferase subunit 1 OS=Homo sapiens OX=9606 GN=DPM1 PE=1 SV=1	10	0.000165084	0.00024911	0.221182	1	0.662693	-0.593588
DPM3	Q9P2X0	sp|Q9P2X0|DPM3_HUMAN Dolichol-phosphate mannosyltransferase subunit 3 OS=Homo sapiens OX=9606 GN=DPM3 PE=1 SV=2	2	0.000226741	0.000228812	0.443888	1	0.990948	-0.0131181
DPP3	Q9NY33	sp|Q9NY33|DPP3_HUMAN Dipeptidyl peptidase 3 OS=Homo sapiens OX=9606 GN=DPP3 PE=1 SV=2	8	4.3956e-05	2.91551e-05	0.356113	1	1.50766	0.59231
DPP7	Q9UHL4	sp|Q9UHL4|DPP2_HUMAN Dipeptidyl peptidase 2 OS=Homo sapiens OX=9606 GN=DPP7 PE=1 SV=3	2	3.31659e-08	6.15394e-08	0.137773	1	0.538937	-0.891812
DPP9	Q86TI2	sp|Q86TI2|DPP9_HUMAN Dipeptidyl peptidase 9 OS=Homo sapiens OX=9606 GN=DPP9 PE=1 SV=3	11	1.46188e-05	1.0112e-05	0.373793	1	1.44569	0.531757
DPY19L1	Q2PZI1	sp|Q2PZI1|D19L1_HUMAN Probable C-mannosyltransferase DPY19L1 OS=Homo sapiens OX=9606 GN=DPY19L1 PE=2 SV=1	5	1.76023e-06	6.79056e-06	0.0128359	2	0.259217	-1.94777
DPY30	Q9C005	sp|Q9C005|DPY30_HUMAN Protein dpy-30 homolog OS=Homo sapiens OX=9606 GN=DPY30 PE=1 SV=1	3	0.000302322	0.00031923	0.416145	1	0.947034	-0.0785125
DPYSL2	Q16555	sp|Q16555|DPYL2_HUMAN Dihydropyrimidinase-related protein 2 OS=Homo sapiens OX=9606 GN=DPYSL2 PE=1 SV=1	16	8.28401e-05	5.09292e-05	0.324929	1	1.62657	0.701836
DR1	Q01658	sp|Q01658|NC2B_HUMAN Protein Dr1 OS=Homo sapiens OX=9606 GN=DR1 PE=1 SV=1	3	4.85306e-05	3.67207e-05	0.412448	1	1.32161	0.402301
DRAP1	Q14919	sp|Q14919|NC2A_HUMAN Dr1-associated corepressor OS=Homo sapiens OX=9606 GN=DRAP1 PE=1 SV=3	4	8.11495e-05	0.000114222	0.254711	1	0.710456	-0.493182
DRG1	Q9Y295	sp|Q9Y295|DRG1_HUMAN Developmentally-regulated GTP-binding protein 1 OS=Homo sapiens OX=9606 GN=DRG1 PE=1 SV=1	13	2.03868e-05	5.35126e-05	0.0514452	1	0.380973	-1.39224
DRG2	P55039	sp|P55039|DRG2_HUMAN Developmentally-regulated GTP-binding protein 2 OS=Homo sapiens OX=9606 GN=DRG2 PE=1 SV=1	7	1.47183e-05	1.55555e-05	0.415594	1	0.946176	-0.0798192
DSG2	Q14126	sp|Q14126|DSG2_HUMAN Desmoglein-2 OS=Homo sapiens OX=9606 GN=DSG2 PE=1 SV=2	5	5.04201e-06	3.83814e-06	0.415085	1	1.31366	0.39359
DSP	P15924	sp|P15924|DESP_HUMAN Desmoplakin OS=Homo sapiens OX=9606 GN=DSP PE=1 SV=3	39	1.40222e-05	1.12745e-05	0.439141	1	1.2437	0.314639
DST	Q03001	sp|Q03001|DYST_HUMAN Dystonin OS=Homo sapiens OX=9606 GN=DST PE=1 SV=4	37	2.30719e-06	2.39884e-06	0.425572	1	0.961795	-0.0561986
DSTN	P60981	sp|P60981|DEST_HUMAN Destrin OS=Homo sapiens OX=9606 GN=DSTN PE=1 SV=3	6	0.000159117	0.000109239	0.370609	1	1.45659	0.542591
DTD1	Q8TEA8	sp|Q8TEA8|DTD1_HUMAN D-aminoacyl-tRNA deacylase 1 OS=Homo sapiens OX=9606 GN=DTD1 PE=1 SV=2	4	0.000145194	0.000111823	0.420187	1	1.29843	0.376767
DTYMK	P23919	sp|P23919|KTHY_HUMAN Thymidylate kinase OS=Homo sapiens OX=9606 GN=DTYMK PE=1 SV=4	7	3.7293e-05	9.26321e-06	0.0708171	1	4.02592	2.00932
DUSP12	Q9UNI6	sp|Q9UNI6|DUS12_HUMAN Dual specificity protein phosphatase 12 OS=Homo sapiens OX=9606 GN=DUSP12 PE=1 SV=1	3	3.22211e-06	2.74944e-06	0.465529	1	1.17192	0.22887
DUSP23	Q9BVJ7	sp|Q9BVJ7|DUS23_HUMAN Dual specificity protein phosphatase 23 OS=Homo sapiens OX=9606 GN=DUSP23 PE=1 SV=1	2	1.2431e-05	6.15394e-08	2.33791e-09	4	202	7.65821
DUSP3	P51452	sp|P51452|DUS3_HUMAN Dual specificity protein phosphatase 3 OS=Homo sapiens OX=9606 GN=DUSP3 PE=1 SV=1	4	1.18343e-05	3.80124e-05	0.0258487	2	0.311328	-1.68349
DUT	P33316	sp|P33316|DUT_HUMAN Deoxyuridine 5-triphosphate nucleotidohydrolase, mitochondrial OS=Homo sapiens OX=9606 GN=DUT PE=1 SV=4	7	4.00775e-05	2.58337e-05	0.344247	1	1.55137	0.633541
DYNC1H1	Q14204	sp|Q14204|DYHC1_HUMAN Cytoplasmic dynein 1 heavy chain 1 OS=Homo sapiens OX=9606 GN=DYNC1H1 PE=1 SV=5	164	0.000144199	0.000125478	0.474255	1	1.1492	0.200634
DYNC1I2	Q13409	sp|Q13409|DC1I2_HUMAN Cytoplasmic dynein 1 intermediate chain 2 OS=Homo sapiens OX=9606 GN=DYNC1I2 PE=1 SV=3	10	9.66634e-05	8.45129e-05	0.47637	1	1.14377	0.193797
DYNC1LI1	Q9Y6G9	sp|Q9Y6G9|DC1L1_HUMAN Cytoplasmic dynein 1 light intermediate chain 1 OS=Homo sapiens OX=9606 GN=DYNC1LI1 PE=1 SV=3	9	4.79339e-05	4.42863e-05	0.498568	1	1.08236	0.114187
DYNC1LI2	O43237	sp|O43237|DC1L2_HUMAN Cytoplasmic dynein 1 light intermediate chain 2 OS=Homo sapiens OX=9606 GN=DYNC1LI2 PE=1 SV=1	7	1.13371e-05	7.01199e-06	0.327361	1	1.61681	0.693151
DYNC2H1	Q8NCM8	sp|Q8NCM8|DYHC2_HUMAN Cytoplasmic dynein 2 heavy chain 1 OS=Homo sapiens OX=9606 GN=DYNC2H1 PE=1 SV=4	2	3.27184e-06	6.20008e-06	0.130678	1	0.527709	-0.922185
DYNLL1	P63167	sp|P63167|DYL1_HUMAN Dynein light chain 1, cytoplasmic OS=Homo sapiens OX=9606 GN=DYNLL1 PE=1 SV=1	1	0.000269504	0.000212205	0.429905	1	1.27002	0.344847
DYNLL2	Q96FJ2	sp|Q96FJ2|DYL2_HUMAN Dynein light chain 2, cytoplasmic OS=Homo sapiens OX=9606 GN=DYNLL2 PE=1 SV=1	2	0.000374919	0.000265718	0.384158	1	1.41097	0.496684
DYNLRB1	Q9NP97	sp|Q9NP97|DLRB1_HUMAN Dynein light chain roadblock-type 1 OS=Homo sapiens OX=9606 GN=DYNLRB1 PE=1 SV=3;sp|Q8TF09|DLRB2_HUMAN Dynein light chain roadblock-type 2 OS=Homo sapiens OX=9606 GN=DYNLRB2 PE=1 SV=1	4	0.000167072	8.96797e-05	0.272237	1	1.86299	0.897621
DYNLT1	P63172	sp|P63172|DYLT1_HUMAN Dynein light chain Tctex-type 1 OS=Homo sapiens OX=9606 GN=DYNLT1 PE=1 SV=1	2	4.20665e-05	9.41083e-06	0.0562552	1	4.47001	2.16028
DYNLT3	P51808	sp|P51808|DYLT3_HUMAN Dynein light chain Tctex-type 3 OS=Homo sapiens OX=9606 GN=DYNLT3 PE=1 SV=1	2	9.21882e-05	6.15394e-08	2.65829e-16	4	1498.03	10.5489
DYSF	O75923	sp|O75923|DYSF_HUMAN Dysferlin OS=Homo sapiens OX=9606 GN=DYSF PE=1 SV=1	4	7.88622e-07	6.12627e-07	0.423969	1	1.28728	0.364326
EARS2	Q5JPH6	sp|Q5JPH6|SYEM_HUMAN Probable glutamate--tRNA ligase, mitochondrial OS=Homo sapiens OX=9606 GN=EARS2 PE=1 SV=2	1	3.31659e-08	6.15394e-08	0.137773	1	0.538937	-0.891812
EBNA1BP2	Q99848	sp|Q99848|EBP2_HUMAN Probable rRNA-processing protein EBP2 OS=Homo sapiens OX=9606 GN=EBNA1BP2 PE=1 SV=2	11	0.000170056	0.000195598	0.365032	1	0.869417	-0.20188
EBP	Q15125	sp|Q15125|EBP_HUMAN 3-beta-hydroxysteroid-Delta(8),Delta(7)-isomerase OS=Homo sapiens OX=9606 GN=EBP PE=1 SV=3	3	0.000525085	0.000470542	0.487382	1	1.11592	0.158229
ECE1	P42892	sp|P42892|ECE1_HUMAN Endothelin-converting enzyme 1 OS=Homo sapiens OX=9606 GN=ECE1 PE=1 SV=2	17	6.07627e-05	9.90905e-05	0.186955	1	0.613204	-0.705562
ECH1	Q13011	sp|Q13011|ECH1_HUMAN Delta(3,5)-Delta(2,4)-dienoyl-CoA isomerase, mitochondrial OS=Homo sapiens OX=9606 GN=ECH1 PE=1 SV=2	12	0.000192929	0.000156294	0.44246	1	1.2344	0.303811
ECHDC1	Q9NTX5	sp|Q9NTX5|ECHD1_HUMAN Ethylmalonyl-CoA decarboxylase OS=Homo sapiens OX=9606 GN=ECHDC1 PE=1 SV=2	3	4.79339e-06	1.69579e-05	0.0180329	2	0.282663	-1.82284
ECHS1	P30084	sp|P30084|ECHM_HUMAN Enoyl-CoA hydratase, mitochondrial OS=Homo sapiens OX=9606 GN=ECHS1 PE=1 SV=4	13	0.000297349	0.000247265	0.454049	1	1.20255	0.266101
ECI1	P42126	sp|P42126|ECI1_HUMAN Enoyl-CoA delta isomerase 1, mitochondrial OS=Homo sapiens OX=9606 GN=ECI1 PE=1 SV=1	3	3.54035e-05	4.13338e-05	0.356315	1	0.856525	-0.223433
ECI2	O75521	sp|O75521|ECI2_HUMAN Enoyl-CoA delta isomerase 2, mitochondrial OS=Homo sapiens OX=9606 GN=ECI2 PE=1 SV=4	9	0.000145194	0.000107394	0.402568	1	1.35197	0.435065
ECPAS	Q5VYK3	sp|Q5VYK3|ECM29_HUMAN Proteasome adapter and scaffold protein ECM29 OS=Homo sapiens OX=9606 GN=ECPAS PE=1 SV=2	32	2.65526e-05	1.93752e-05	0.396694	1	1.37044	0.454639
ECSIT	Q9BQ95	sp|Q9BQ95|ECSIT_HUMAN Evolutionarily conserved signaling intermediate in Toll pathway, mitochondrial OS=Homo sapiens OX=9606 GN=ECSIT PE=1 SV=1	2	3.31659e-08	6.15394e-08	0.137773	1	0.538937	-0.891812
EDC4	Q6P2E9	sp|Q6P2E9|EDC4_HUMAN Enhancer of mRNA-decapping protein 4 OS=Homo sapiens OX=9606 GN=EDC4 PE=1 SV=1	13	7.39892e-06	3.72743e-06	0.249152	1	1.985	0.989136
EDEM3	Q9BZQ6	sp|Q9BZQ6|EDEM3_HUMAN ER degradation-enhancing alpha-mannosidase-like protein 3 OS=Homo sapiens OX=9606 GN=EDEM3 PE=1 SV=2	1	3.31659e-08	9.72452e-07	3.47952e-08	4	0.0341054	-4.87386
EDF1	O60869	sp|O60869|EDF1_HUMAN Endothelial differentiation-related factor 1 OS=Homo sapiens OX=9606 GN=EDF1 PE=1 SV=1	7	0.000276465	0.000178621	0.345204	1	1.54777	0.630194
EDIL3	O43854	sp|O43854|EDIL3_HUMAN EGF-like repeat and discoidin I-like domain-containing protein 3 OS=Homo sapiens OX=9606 GN=EDIL3 PE=1 SV=1	9	1.17349e-05	3.48754e-06	0.102279	1	3.36479	1.75052
EEA1	Q15075	sp|Q15075|EEA1_HUMAN Early endosome antigen 1 OS=Homo sapiens OX=9606 GN=EEA1 PE=1 SV=2	34	3.64974e-05	3.00778e-05	0.45005	1	1.21343	0.279096
EED	O75530	sp|O75530|EED_HUMAN Polycomb protein EED OS=Homo sapiens OX=9606 GN=EED PE=1 SV=2	8	1.06409e-05	5.20364e-06	0.238702	1	2.0449	1.03203
EEF1A1	P68104	sp|P68104|EF1A1_HUMAN Elongation factor 1-alpha 1 OS=Homo sapiens OX=9606 GN=EEF1A1 PE=1 SV=1;sp|Q5VTE0|EF1A3_HUMAN Putative elongation factor 1-alpha-like 3 OS=Homo sapiens OX=9606 GN=EEF1A1P5 PE=5 SV=1	18	0.0159117	0.0123817	0.424715	1	1.2851	0.361875
EEF1A2	Q05639	sp|Q05639|EF1A2_HUMAN Elongation factor 1-alpha 2 OS=Homo sapiens OX=9606 GN=EEF1A2 PE=1 SV=1	1	7.14036e-06	6.15394e-08	8.16471e-08	4	116.029	6.85834
EEF1AKNMT	Q8N6R0	sp|Q8N6R0|EFNMT_HUMAN eEF1A lysine and N-terminal methyltransferase OS=Homo sapiens OX=9606 GN=EEF1AKNMT PE=1 SV=1	2	9.9249e-07	6.15394e-08	0.00124239	3	16.1277	4.01147
EEF1B2	P24534	sp|P24534|EF1B_HUMAN Elongation factor 1-beta OS=Homo sapiens OX=9606 GN=EEF1B2 PE=1 SV=3	12	0.00147183	0.00127508	0.472278	1	1.15431	0.207028
EEF1D	P29692	sp|P29692|EF1D_HUMAN Elongation factor 1-delta OS=Homo sapiens OX=9606 GN=EEF1D PE=1 SV=5	17	0.00128288	0.00102043	0.434376	1	1.25719	0.330208
EEF1E1	O43324	sp|O43324|MCA3_HUMAN Eukaryotic translation elongation factor 1 epsilon-1 OS=Homo sapiens OX=9606 GN=EEF1E1 PE=1 SV=1	4	6.65307e-05	5.59114e-06	0.00363308	3	11.8993	3.5728
EEF1G	P26641	sp|P26641|EF1G_HUMAN Elongation factor 1-gamma OS=Homo sapiens OX=9606 GN=EEF1G PE=1 SV=3	27	0.00191934	0.00176591	0.499167	1	1.08688	0.120198
EEF2	P13639	sp|P13639|EF2_HUMAN Elongation factor 2 OS=Homo sapiens OX=9606 GN=EEF2 PE=1 SV=4	50	0.00151161	0.00144299	0.47825	1	1.04755	0.067019
EFHD1	Q9BUP0	sp|Q9BUP0|EFHD1_HUMAN EF-hand domain-containing protein D1 OS=Homo sapiens OX=9606 GN=EFHD1 PE=1 SV=1	3	3.242e-06	3.04468e-06	0.488401	1	1.06481	0.0905941
EFHD2	Q96C19	sp|Q96C19|EFHD2_HUMAN EF-hand domain-containing protein D2 OS=Homo sapiens OX=9606 GN=EFHD2 PE=1 SV=1	8	0.000233703	0.000287861	0.325709	1	0.81186	-0.300697
EFTUD2	Q15029	sp|Q15029|U5S1_HUMAN 116 kDa U5 small nuclear ribonucleoprotein component OS=Homo sapiens OX=9606 GN=EFTUD2 PE=1 SV=1	39	0.000146188	0.000157401	0.404342	1	0.928766	-0.106613
EGFR	P00533	sp|P00533|EGFR_HUMAN Epidermal growth factor receptor OS=Homo sapiens OX=9606 GN=EGFR PE=1 SV=2	30	8.16467e-05	9.28166e-05	0.371913	1	0.879656	-0.184988
EGLN1	Q9GZT9	sp|Q9GZT9|EGLN1_HUMAN Egl nine homolog 1 OS=Homo sapiens OX=9606 GN=EGLN1 PE=1 SV=1	3	4.30609e-06	6.15394e-08	1.5055e-06	4	69.9729	6.12872
EHBP1	Q8NDI1	sp|Q8NDI1|EHBP1_HUMAN EH domain-binding protein 1 OS=Homo sapiens OX=9606 GN=EHBP1 PE=1 SV=3	3	5.64864e-07	1.27508e-06	0.0813742	1	0.443005	-1.17461
EHBP1L1	Q8N3D4	sp|Q8N3D4|EH1L1_HUMAN EH domain-binding protein 1-like protein 1 OS=Homo sapiens OX=9606 GN=EHBP1L1 PE=1 SV=2	3	2.14807e-06	1.40978e-06	0.351703	1	1.5237	0.607575
EHD1	Q9H4M9	sp|Q9H4M9|EHD1_HUMAN EH domain-containing protein 1 OS=Homo sapiens OX=9606 GN=EHD1 PE=1 SV=2	17	0.000412709	0.000361671	0.477407	1	1.14112	0.190446
EHD2	Q9NZN4	sp|Q9NZN4|EHD2_HUMAN EH domain-containing protein 2 OS=Homo sapiens OX=9606 GN=EHD2 PE=1 SV=2	19	0.000105415	9.48464e-05	0.489184	1	1.11143	0.152412
EHD4	Q9H223	sp|Q9H223|EHD4_HUMAN EH domain-containing protein 4 OS=Homo sapiens OX=9606 GN=EHD4 PE=1 SV=1	13	3.70941e-05	4.42863e-05	0.343419	1	0.837598	-0.255671
EI24	O14681	sp|O14681|EI24_HUMAN Etoposide-induced protein 2.4 homolog OS=Homo sapiens OX=9606 GN=EI24 PE=1 SV=4	2	1.05415e-05	5.6834e-06	0.273882	1	1.85478	0.89125
EIF1	P41567	sp|P41567|EIF1_HUMAN Eukaryotic translation initiation factor 1 OS=Homo sapiens OX=9606 GN=EIF1 PE=1 SV=1;sp|O60739|EIF1B_HUMAN Eukaryotic translation initiation factor 1b OS=Homo sapiens OX=9606 GN=EIF1B PE=1 SV=2	5	0.000178012	0.000169949	0.478188	1	1.04745	0.0668747
EIF1AX	P47813	sp|P47813|IF1AX_HUMAN Eukaryotic translation initiation factor 1A, X-chromosomal OS=Homo sapiens OX=9606 GN=EIF1AX PE=1 SV=2;sp|O14602|IF1AY_HUMAN Eukaryotic translation initiation factor 1A, Y-chromosomal OS=Homo sapiens OX=9606 GN=EIF1AY PE=1 SV=4	5	0.000256576	0.000276789	0.403175	1	0.926971	-0.109403
EIF2A	Q9BY44	sp|Q9BY44|EIF2A_HUMAN Eukaryotic translation initiation factor 2A OS=Homo sapiens OX=9606 GN=EIF2A PE=1 SV=3	20	6.04643e-05	2.12205e-05	0.139559	1	2.84934	1.51063
EIF2AK2	P19525	sp|P19525|E2AK2_HUMAN Interferon-induced, double-stranded RNA-activated protein kinase OS=Homo sapiens OX=9606 GN=EIF2AK2 PE=1 SV=2	13	7.80666e-05	6.20008e-05	0.4337	1	1.25912	0.33242
EIF2AK4	Q9P2K8	sp|Q9P2K8|E2AK4_HUMAN eIF-2-alpha kinase GCN2 OS=Homo sapiens OX=9606 GN=EIF2AK4 PE=1 SV=3	2	4.51494e-07	6.15394e-08	0.0160819	2	7.33665	2.87512
EIF2B1	Q14232	sp|Q14232|EI2BA_HUMAN Translation initiation factor eIF-2B subunit alpha OS=Homo sapiens OX=9606 GN=EIF2B1 PE=1 SV=1	5	1.40222e-05	9.2263e-06	0.352767	1	1.5198	0.603883
EIF2B2	P49770	sp|P49770|EI2BB_HUMAN Translation initiation factor eIF-2B subunit beta OS=Homo sapiens OX=9606 GN=EIF2B2 PE=1 SV=3	9	3.31162e-05	4.20719e-05	0.308536	1	0.787131	-0.345323
EIF2B3	Q9NR50	sp|Q9NR50|EI2BG_HUMAN Translation initiation factor eIF-2B subunit gamma OS=Homo sapiens OX=9606 GN=EIF2B3 PE=1 SV=1	6	1.08398e-05	5.11137e-06	0.226238	1	2.12073	1.08456
EIF2B4	Q9UI10	sp|Q9UI10|EI2BD_HUMAN Translation initiation factor eIF-2B subunit delta OS=Homo sapiens OX=9606 GN=EIF2B4 PE=1 SV=2	6	2.91382e-05	1.4596e-05	0.247135	1	1.99631	0.997339
EIF2B5	Q13144	sp|Q13144|EI2BE_HUMAN Translation initiation factor eIF-2B subunit epsilon OS=Homo sapiens OX=9606 GN=EIF2B5 PE=1 SV=3	7	1.21326e-05	1.31752e-05	0.399197	1	0.920873	-0.118927
EIF2D	P41214	sp|P41214|EIF2D_HUMAN Eukaryotic translation initiation factor 2D OS=Homo sapiens OX=9606 GN=EIF2D PE=1 SV=3	4	1.88951e-06	6.15394e-08	8.95402e-05	4	30.704	4.94036
EIF2S1	P05198	sp|P05198|IF2A_HUMAN Eukaryotic translation initiation factor 2 subunit 1 OS=Homo sapiens OX=9606 GN=EIF2S1 PE=1 SV=3	20	0.000329173	0.000313694	0.479311	1	1.04934	0.0694846
EIF2S2	P20042	sp|P20042|IF2B_HUMAN Eukaryotic translation initiation factor 2 subunit 2 OS=Homo sapiens OX=9606 GN=EIF2S2 PE=1 SV=2	14	0.000234697	0.000201133	0.467451	1	1.16687	0.222647
EIF2S3	P41091	sp|P41091|IF2G_HUMAN Eukaryotic translation initiation factor 2 subunit 3 OS=Homo sapiens OX=9606 GN=EIF2S3 PE=1 SV=3;sp|Q2VIR3|IF2GL_HUMAN Eukaryotic translation initiation factor 2 subunit 3B OS=Homo sapiens OX=9606 GN=EIF2S3B PE=2 SV=2	18	0.000493262	0.000328456	0.357753	1	1.50176	0.586651
EIF3A	Q14152	sp|Q14152|EIF3A_HUMAN Eukaryotic translation initiation factor 3 subunit A OS=Homo sapiens OX=9606 GN=EIF3A PE=1 SV=1	50	0.00025757	0.000188217	0.397314	1	1.36848	0.452571
EIF3B	P55884	sp|P55884|EIF3B_HUMAN Eukaryotic translation initiation factor 3 subunit B OS=Homo sapiens OX=9606 GN=EIF3B PE=1 SV=3	29	0.000267515	0.000263872	0.457958	1	1.0138	0.0197792
EIF3C	Q99613	sp|Q99613|EIF3C_HUMAN Eukaryotic translation initiation factor 3 subunit C OS=Homo sapiens OX=9606 GN=EIF3C PE=1 SV=1;sp|B5ME19|EIFCL_HUMAN Eukaryotic translation initiation factor 3 subunit C-like protein OS=Homo sapiens OX=9606 GN=EIF3CL PE=3 SV=1	30	0.000184973	0.000166996	0.490706	1	1.10765	0.147501
EIF3D	O15371	sp|O15371|EIF3D_HUMAN Eukaryotic translation initiation factor 3 subunit D OS=Homo sapiens OX=9606 GN=EIF3D PE=1 SV=1	18	0.000237681	0.000197443	0.453591	1	1.20379	0.267588
EIF3E	P60228	sp|P60228|EIF3E_HUMAN Eukaryotic translation initiation factor 3 subunit E OS=Homo sapiens OX=9606 GN=EIF3E PE=1 SV=1	18	0.000278454	0.000278634	0.449092	1	0.999353	-0.000933543
EIF3F	O00303	sp|O00303|EIF3F_HUMAN Eukaryotic translation initiation factor 3 subunit F OS=Homo sapiens OX=9606 GN=EIF3F PE=1 SV=1	12	0.000537019	0.000441017	0.4485	1	1.21768	0.284137
EIF3G	O75821	sp|O75821|EIF3G_HUMAN Eukaryotic translation initiation factor 3 subunit G OS=Homo sapiens OX=9606 GN=EIF3G PE=1 SV=2	11	0.000146188	0.000123632	0.461547	1	1.18244	0.241771
EIF3H	O15372	sp|O15372|EIF3H_HUMAN Eukaryotic translation initiation factor 3 subunit H OS=Homo sapiens OX=9606 GN=EIF3H PE=1 SV=1	12	0.00015315	0.000121049	0.431583	1	1.26519	0.339351
EIF3I	Q13347	sp|Q13347|EIF3I_HUMAN Eukaryotic translation initiation factor 3 subunit I OS=Homo sapiens OX=9606 GN=EIF3I PE=1 SV=1	15	0.000317239	0.000197443	0.329894	1	1.60674	0.684134
EIF3J	O75822	sp|O75822|EIF3J_HUMAN Eukaryotic translation initiation factor 3 subunit J OS=Homo sapiens OX=9606 GN=EIF3J PE=1 SV=2	5	6.72268e-05	2.98932e-05	0.206946	1	2.2489	1.16922
EIF3K	Q9UBQ5	sp|Q9UBQ5|EIF3K_HUMAN Eukaryotic translation initiation factor 3 subunit K OS=Homo sapiens OX=9606 GN=EIF3K PE=1 SV=1	9	0.000205857	0.00012271	0.312572	1	1.67759	0.746393
EIF3L	Q9Y262	sp|Q9Y262|EIF3L_HUMAN Eukaryotic translation initiation factor 3 subunit L OS=Homo sapiens OX=9606 GN=EIF3L PE=1 SV=1	22	0.00026652	0.000221431	0.453653	1	1.20363	0.267387
EIF3M	Q7L2H7	sp|Q7L2H7|EIF3M_HUMAN Eukaryotic translation initiation factor 3 subunit M OS=Homo sapiens OX=9606 GN=EIF3M PE=1 SV=1	14	0.000317239	0.000184526	0.302914	1	1.71921	0.781745
EIF4A1	P60842	sp|P60842|IF4A1_HUMAN Eukaryotic initiation factor 4A-I OS=Homo sapiens OX=9606 GN=EIF4A1 PE=1 SV=1	13	0.00200885	0.00215896	0.405451	1	0.930472	-0.103965
EIF4A2	Q14240	sp|Q14240|IF4A2_HUMAN Eukaryotic initiation factor 4A-II OS=Homo sapiens OX=9606 GN=EIF4A2 PE=1 SV=2	7	5.75803e-05	3.24766e-05	0.290969	1	1.77298	0.826176
EIF4A3	P38919	sp|P38919|IF4A3_HUMAN Eukaryotic initiation factor 4A-III OS=Homo sapiens OX=9606 GN=EIF4A3 PE=1 SV=4	23	0.000799561	0.000773164	0.470257	1	1.03414	0.0484334
EIF4B	P23588	sp|P23588|IF4B_HUMAN Eukaryotic translation initiation factor 4B OS=Homo sapiens OX=9606 GN=EIF4B PE=1 SV=2	11	5.41991e-05	3.8566e-05	0.385864	1	1.40536	0.490941
EIF4E	P06730	sp|P06730|IF4E_HUMAN Eukaryotic translation initiation factor 4E OS=Homo sapiens OX=9606 GN=EIF4E PE=1 SV=2	6	7.98567e-05	8.45129e-05	0.414777	1	0.944905	-0.0817594
EIF4EBP1	Q13541	sp|Q13541|4EBP1_HUMAN Eukaryotic translation initiation factor 4E-binding protein 1 OS=Homo sapiens OX=9606 GN=EIF4EBP1 PE=1 SV=3	1	9.39783e-06	6.15394e-08	1.47138e-08	4	152.712	7.25467
EIF4G1	Q04637	sp|Q04637|IF4G1_HUMAN Eukaryotic translation initiation factor 4 gamma 1 OS=Homo sapiens OX=9606 GN=EIF4G1 PE=1 SV=4	35	0.000127293	0.000109978	0.471066	1	1.15745	0.210948
EIF4G2	P78344	sp|P78344|IF4G2_HUMAN Eukaryotic translation initiation factor 4 gamma 2 OS=Homo sapiens OX=9606 GN=EIF4G2 PE=1 SV=1	20	4.45527e-05	5.00066e-05	0.379447	1	0.890936	-0.166606
EIF4G3	O43432	sp|O43432|IF4G3_HUMAN Eukaryotic translation initiation factor 4 gamma 3 OS=Homo sapiens OX=9606 GN=EIF4G3 PE=1 SV=2	2	4.88289e-07	3.1554e-07	0.345284	1	1.54747	0.629915
EIF4H	Q15056	sp|Q15056|IF4H_HUMAN Eukaryotic translation initiation factor 4H OS=Homo sapiens OX=9606 GN=EIF4H PE=1 SV=5	8	0.000281438	0.000195598	0.375805	1	1.43886	0.524926
EIF5	P55010	sp|P55010|IF5_HUMAN Eukaryotic translation initiation factor 5 OS=Homo sapiens OX=9606 GN=EIF5 PE=1 SV=2	8	3.37128e-05	2.95242e-05	0.477111	1	1.14187	0.191402
EIF5A	P63241	sp|P63241|IF5A1_HUMAN Eukaryotic translation initiation factor 5A-1 OS=Homo sapiens OX=9606 GN=EIF5A PE=1 SV=2;sp|Q6IS14|IF5AL_HUMAN Eukaryotic translation initiation factor 5A-1-like OS=Homo sapiens OX=9606 GN=EIF5AL1 PE=2 SV=2	5	0.00328178	0.0028048	0.466235	1	1.17006	0.226583
EIF5B	O60841	sp|O60841|IF2P_HUMAN Eukaryotic translation initiation factor 5B OS=Homo sapiens OX=9606 GN=EIF5B PE=1 SV=4	37	0.000169061	0.000137287	0.443522	1	1.23144	0.300348
EIF6	P56537	sp|P56537|IF6_HUMAN Eukaryotic translation initiation factor 6 OS=Homo sapiens OX=9606 GN=EIF6 PE=1 SV=1	9	0.000804534	0.000688282	0.466677	1	1.1689	0.225152
EIPR1	Q53HC9	sp|Q53HC9|EIPR1_HUMAN EARP and GARP complex-interacting protein 1 OS=Homo sapiens OX=9606 GN=EIPR1 PE=1 SV=2	2	3.31659e-08	6.15394e-08	0.137773	1	0.538937	-0.891812
ELAC2	Q9BQ52	sp|Q9BQ52|RNZ2_HUMAN Zinc phosphodiesterase ELAC protein 2 OS=Homo sapiens OX=9606 GN=ELAC2 PE=1 SV=2	10	1.25304e-05	1.17912e-05	0.487165	1	1.06269	0.0877241
ELAVL1	Q15717	sp|Q15717|ELAV1_HUMAN ELAV-like protein 1 OS=Homo sapiens OX=9606 GN=ELAVL1 PE=1 SV=2	12	0.000263537	0.000201133	0.416217	1	1.31026	0.389852
ELK3	P41970	sp|P41970|ELK3_HUMAN ETS domain-containing protein Elk-3 OS=Homo sapiens OX=9606 GN=ELK3 PE=1 SV=2	1	3.31659e-08	6.15394e-08	0.137773	1	0.538937	-0.891812
ELMO2	Q96JJ3	sp|Q96JJ3|ELMO2_HUMAN Engulfment and cell motility protein 2 OS=Homo sapiens OX=9606 GN=ELMO2 PE=1 SV=2	4	3.28178e-06	1.77883e-06	0.275878	1	1.84491	0.883549
ELMOD2	Q8IZ81	sp|Q8IZ81|ELMD2_HUMAN ELMO domain-containing protein 2 OS=Homo sapiens OX=9606 GN=ELMOD2 PE=1 SV=1	4	3.31659e-08	6.15394e-08	0.137773	1	0.538937	-0.891812
ELOB	Q15370	sp|Q15370|ELOB_HUMAN Elongin-B OS=Homo sapiens OX=9606 GN=ELOB PE=1 SV=1	4	0.000116354	0.000119573	0.43271	1	0.97308	-0.039369
ELOC	Q15369	sp|Q15369|ELOC_HUMAN Elongin-C OS=Homo sapiens OX=9606 GN=ELOC PE=1 SV=1	5	0.000294366	0.000267563	0.493733	1	1.10017	0.137732
ELOVL1	Q9BW60	sp|Q9BW60|ELOV1_HUMAN Elongation of very long chain fatty acids protein 1 OS=Homo sapiens OX=9606 GN=ELOVL1 PE=1 SV=1	4	0.000285416	0.000369052	0.298929	1	0.773374	-0.370761
ELOVL5	Q9NYP7	sp|Q9NYP7|ELOV5_HUMAN Elongation of very long chain fatty acids protein 5 OS=Homo sapiens OX=9606 GN=ELOVL5 PE=1 SV=1	3	0.000188951	0.000151496	0.437887	1	1.24724	0.318733
ELP1	O95163	sp|O95163|ELP1_HUMAN Elongator complex protein 1 OS=Homo sapiens OX=9606 GN=ELP1 PE=1 SV=3	6	2.56576e-06	3.76433e-06	0.234419	1	0.681597	-0.55301
EMC1	Q8N766	sp|Q8N766|EMC1_HUMAN ER membrane protein complex subunit 1 OS=Homo sapiens OX=9606 GN=EMC1 PE=1 SV=1	23	4.9724e-05	6.47687e-05	0.294968	1	0.767716	-0.381355
EMC10	Q5UCC4	sp|Q5UCC4|EMC10_HUMAN ER membrane protein complex subunit 10 OS=Homo sapiens OX=9606 GN=EMC10 PE=1 SV=1	2	2.8641e-05	4.50244e-05	0.202709	1	0.636122	-0.652624
EMC2	Q15006	sp|Q15006|EMC2_HUMAN ER membrane protein complex subunit 2 OS=Homo sapiens OX=9606 GN=EMC2 PE=1 SV=1	5	6.25527e-05	6.07091e-05	0.467991	1	1.03037	0.0431606
EMC3	Q9P0I2	sp|Q9P0I2|EMC3_HUMAN ER membrane protein complex subunit 3 OS=Homo sapiens OX=9606 GN=EMC3 PE=1 SV=3	5	3.80885e-05	5.22209e-05	0.268031	1	0.729374	-0.455269
EMC4	Q5J8M3	sp|Q5J8M3|EMC4_HUMAN ER membrane protein complex subunit 4 OS=Homo sapiens OX=9606 GN=EMC4 PE=1 SV=2	2	3.03316e-05	3.94886e-05	0.295244	1	0.768111	-0.380613
EMC7	Q9NPA0	sp|Q9NPA0|EMC7_HUMAN ER membrane protein complex subunit 7 OS=Homo sapiens OX=9606 GN=EMC7 PE=1 SV=1	4	9.47739e-05	7.95307e-05	0.458092	1	1.19166	0.252977
EMC8	O43402	sp|O43402|EMC8_HUMAN ER membrane protein complex subunit 8 OS=Homo sapiens OX=9606 GN=EMC8 PE=1 SV=1	4	2.73482e-05	4.11493e-05	0.222521	1	0.664608	-0.589424
EMD	P50402	sp|P50402|EMD_HUMAN Emerin OS=Homo sapiens OX=9606 GN=EMD PE=1 SV=1	12	0.00029536	0.000321075	0.398568	1	0.919909	-0.120436
EMG1	Q92979	sp|Q92979|NEP1_HUMAN Ribosomal RNA small subunit methyltransferase NEP1 OS=Homo sapiens OX=9606 GN=EMG1 PE=1 SV=4	6	2.63537e-05	1.74008e-05	0.354221	1	1.51451	0.598851
EML2	O95834	sp|O95834|EMAL2_HUMAN Echinoderm microtubule-associated protein-like 2 OS=Homo sapiens OX=9606 GN=EML2 PE=1 SV=1	2	2.5757e-06	6.15394e-08	2.11935e-05	4	41.8545	5.38731
EML4	Q9HC35	sp|Q9HC35|EMAL4_HUMAN Echinoderm microtubule-associated protein-like 4 OS=Homo sapiens OX=9606 GN=EML4 PE=1 SV=3	12	4.59449e-05	1.20865e-05	0.0799509	1	3.80136	1.92651
EMP3	P54852	sp|P54852|EMP3_HUMAN Epithelial membrane protein 3 OS=Homo sapiens OX=9606 GN=EMP3 PE=1 SV=1	3	5.68842e-05	5.25899e-05	0.49816	1	1.08166	0.113241
ENAH	Q8N8S7	sp|Q8N8S7|ENAH_HUMAN Protein enabled homolog OS=Homo sapiens OX=9606 GN=ENAH PE=1 SV=2	6	1.03426e-05	6.15394e-08	7.92161e-09	4	168.064	7.39287
ENDOD1	O94919	sp|O94919|ENDD1_HUMAN Endonuclease domain-containing 1 protein OS=Homo sapiens OX=9606 GN=ENDOD1 PE=1 SV=2	9	3.30167e-05	2.1405e-05	0.346622	1	1.54247	0.625247
ENDOG	Q14249	sp|Q14249|NUCG_HUMAN Endonuclease G, mitochondrial OS=Homo sapiens OX=9606 GN=ENDOG PE=1 SV=4	3	3.49062e-06	5.36971e-06	0.212375	1	0.650058	-0.62136
ENO1	P06733	sp|P06733|ENOA_HUMAN Alpha-enolase OS=Homo sapiens OX=9606 GN=ENO1 PE=1 SV=2	20	0.00910943	0.00699354	0.418799	1	1.30255	0.381338
ENO2	P09104	sp|P09104|ENOG_HUMAN Gamma-enolase OS=Homo sapiens OX=9606 GN=ENO2 PE=1 SV=3	10	5.94699e-05	5.42507e-05	0.495349	1	1.0962	0.132518
ENOPH1	Q9UHY7	sp|Q9UHY7|ENOPH_HUMAN Enolase-phosphatase E1 OS=Homo sapiens OX=9606 GN=ENOPH1 PE=1 SV=1	5	3.88841e-05	5.94174e-06	0.0219911	2	6.54423	2.71022
ENPP1	P22413	sp|P22413|ENPP1_HUMAN Ectonucleotide pyrophosphatase/phosphodiesterase family member 1 OS=Homo sapiens OX=9606 GN=ENPP1 PE=1 SV=2	8	1.21326e-05	1.0887e-05	0.487985	1	1.11441	0.156282
ENSA	O43768	sp|O43768|ENSA_HUMAN Alpha-endosulfine OS=Homo sapiens OX=9606 GN=ENSA PE=1 SV=1	1	3.31659e-08	6.64294e-06	2.494e-17	4	0.00499265	-7.64598
ENY2	Q9NPA8	sp|Q9NPA8|ENY2_HUMAN Transcription and mRNA export factor ENY2 OS=Homo sapiens OX=9606 GN=ENY2 PE=1 SV=1	3	6.20555e-05	2.8417e-05	0.216487	1	2.18374	1.1268
EOGT	Q5NDL2	sp|Q5NDL2|EOGT_HUMAN EGF domain-specific O-linked N-acetylglucosamine transferase OS=Homo sapiens OX=9606 GN=EOGT PE=1 SV=1	1	3.31659e-08	1.48174e-06	7.30466e-10	4	0.022383	-5.48145
EPB41L2	O43491	sp|O43491|E41L2_HUMAN Band 4.1-like protein 2 OS=Homo sapiens OX=9606 GN=EPB41L2 PE=1 SV=1	11	2.06852e-05	2.08514e-05	0.444557	1	0.992025	-0.0115511
EPDR1	Q9UM22	sp|Q9UM22|EPDR1_HUMAN Mammalian ependymin-related protein 1 OS=Homo sapiens OX=9606 GN=EPDR1 PE=1 SV=2	2	8.26412e-06	1.59431e-05	0.12485	1	0.518352	-0.947995
EPG5	Q9HCE0	sp|Q9HCE0|EPG5_HUMAN Ectopic P granules protein 5 homolog OS=Homo sapiens OX=9606 GN=EPG5 PE=1 SV=2	7	1.1536e-06	8.32213e-07	0.391769	1	1.38618	0.471114
EPHA2	P29317	sp|P29317|EPHA2_HUMAN Ephrin type-A receptor 2 OS=Homo sapiens OX=9606 GN=EPHA2 PE=1 SV=2	28	8.6818e-05	8.46975e-05	0.464777	1	1.02504	0.0356757
EPHB2	P29323	sp|P29323|EPHB2_HUMAN Ephrin type-B receptor 2 OS=Homo sapiens OX=9606 GN=EPHB2 PE=1 SV=5;sp|P54762|EPHB1_HUMAN Ephrin type-B receptor 1 OS=Homo sapiens OX=9606 GN=EPHB1 PE=1 SV=1	3	3.04311e-06	1.81943e-06	0.313764	1	1.67256	0.74206
EPHX1	P07099	sp|P07099|HYEP_HUMAN Epoxide hydrolase 1 OS=Homo sapiens OX=9606 GN=EPHX1 PE=1 SV=1	17	0.000305305	0.000310004	0.440086	1	0.984843	-0.0220344
EPN1	Q9Y6I3	sp|Q9Y6I3|EPN1_HUMAN Epsin-1 OS=Homo sapiens OX=9606 GN=EPN1 PE=1 SV=2	5	1.42211e-05	1.93752e-05	0.271273	1	0.733981	-0.446186
EPRS	P07814	sp|P07814|SYEP_HUMAN Bifunctional glutamate/proline--tRNA ligase OS=Homo sapiens OX=9606 GN=EPRS PE=1 SV=5	43	0.000100442	7.69474e-05	0.417863	1	1.30534	0.384424
EPS15	P42566	sp|P42566|EPS15_HUMAN Epidermal growth factor receptor substrate 15 OS=Homo sapiens OX=9606 GN=EPS15 PE=1 SV=2	7	7.20997e-06	6.01555e-06	0.455528	1	1.19856	0.261297
EPS15L1	Q9UBC2	sp|Q9UBC2|EP15R_HUMAN Epidermal growth factor receptor substrate 15-like 1 OS=Homo sapiens OX=9606 GN=EPS15L1 PE=1 SV=1	7	1.26299e-05	9.59536e-06	0.414224	1	1.31625	0.396433
EPS8	Q12929	sp|Q12929|EPS8_HUMAN Epidermal growth factor receptor kinase substrate 8 OS=Homo sapiens OX=9606 GN=EPS8 PE=1 SV=1	2	3.31659e-08	4.85304e-06	1.42085e-15	4	0.00683405	-7.19304
EPS8L2	Q9H6S3	sp|Q9H6S3|ES8L2_HUMAN Epidermal growth factor receptor kinase substrate 8-like protein 2 OS=Homo sapiens OX=9606 GN=EPS8L2 PE=1 SV=2	14	5.51936e-05	4.9822e-05	0.490639	1	1.10781	0.147717
ERAL1	O75616	sp|O75616|ERAL1_HUMAN GTPase Era, mitochondrial OS=Homo sapiens OX=9606 GN=ERAL1 PE=1 SV=2	6	9.13926e-06	2.28812e-05	0.0597002	1	0.399422	-1.32402
ERAP1	Q9NZ08	sp|Q9NZ08|ERAP1_HUMAN Endoplasmic reticulum aminopeptidase 1 OS=Homo sapiens OX=9606 GN=ERAP1 PE=1 SV=3	18	2.42653e-05	4.02267e-05	0.180155	1	0.603214	-0.729259
ERBIN	Q96RT1	sp|Q96RT1|ERBIN_HUMAN Erbin OS=Homo sapiens OX=9606 GN=ERBIN PE=1 SV=2	11	1.05415e-05	6.67984e-06	0.337224	1	1.5781	0.658191
ERC1	Q8IUD2	sp|Q8IUD2|RB6I2_HUMAN ELKS/Rab6-interacting/CAST family member 1 OS=Homo sapiens OX=9606 GN=ERC1 PE=1 SV=1	7	1.19337e-06	1.95598e-06	0.184849	1	0.610117	-0.712842
ERCC2	P18074	sp|P18074|ERCC2_HUMAN General transcription and DNA repair factor IIH helicase subunit XPD OS=Homo sapiens OX=9606 GN=ERCC2 PE=1 SV=1	1	1.2431e-06	1.21234e-06	0.464981	1	1.02537	0.036151
ERCC3	P19447	sp|P19447|ERCC3_HUMAN General transcription and DNA repair factor IIH helicase subunit XPB OS=Homo sapiens OX=9606 GN=ERCC3 PE=1 SV=1	5	1.86962e-06	1.86371e-06	0.451443	1	1.00317	0.00456555
ERCC6L	Q2NKX8	sp|Q2NKX8|ERC6L_HUMAN DNA excision repair protein ERCC-6-like OS=Homo sapiens OX=9606 GN=ERCC6L PE=1 SV=1	5	3.86852e-06	1.82496e-06	0.226388	1	2.11978	1.08392
ERGIC1	Q969X5	sp|Q969X5|ERGI1_HUMAN Endoplasmic reticulum-Golgi intermediate compartment protein 1 OS=Homo sapiens OX=9606 GN=ERGIC1 PE=1 SV=1	6	4.71383e-05	7.787e-05	0.181603	1	0.605346	-0.724168
ERGIC3	Q9Y282	sp|Q9Y282|ERGI3_HUMAN Endoplasmic reticulum-Golgi intermediate compartment protein 3 OS=Homo sapiens OX=9606 GN=ERGIC3 PE=1 SV=1	5	2.01879e-05	7.7501e-06	0.16311	1	2.60486	1.38121
ERH	P84090	sp|P84090|ERH_HUMAN Enhancer of rudimentary homolog OS=Homo sapiens OX=9606 GN=ERH PE=1 SV=1	3	0.000694146	0.000891261	0.302747	1	0.778836	-0.360608
ERLEC1	Q96DZ1	sp|Q96DZ1|ERLEC_HUMAN Endoplasmic reticulum lectin 1 OS=Homo sapiens OX=9606 GN=ERLEC1 PE=1 SV=1	9	7.96578e-06	1.01858e-05	0.304987	1	0.782044	-0.354678
ERLIN1	O75477	sp|O75477|ERLN1_HUMAN Erlin-1 OS=Homo sapiens OX=9606 GN=ERLIN1 PE=1 SV=2	11	0.000237681	0.000258337	0.398655	1	0.920042	-0.120228
ERLIN2	O94905	sp|O94905|ERLN2_HUMAN Erlin-2 OS=Homo sapiens OX=9606 GN=ERLIN2 PE=1 SV=1	10	8.81108e-05	3.76433e-05	0.194372	1	2.34068	1.22693
ERMP1	Q7Z2K6	sp|Q7Z2K6|ERMP1_HUMAN Endoplasmic reticulum metallopeptidase 1 OS=Homo sapiens OX=9606 GN=ERMP1 PE=1 SV=2	2	1.40222e-06	6.15394e-08	0.00032181	4	22.7856	4.51005
ERO1A	Q96HE7	sp|Q96HE7|ERO1A_HUMAN ERO1-like protein alpha OS=Homo sapiens OX=9606 GN=ERO1A PE=1 SV=2	21	0.000349062	0.000346909	0.45331	1	1.00621	0.00892655
ERP29	P30040	sp|P30040|ERP29_HUMAN Endoplasmic reticulum resident protein 29 OS=Homo sapiens OX=9606 GN=ERP29 PE=1 SV=4	11	0.000188951	0.000542507	0.0382988	2	0.348293	-1.52163
ERP44	Q9BS26	sp|Q9BS26|ERP44_HUMAN Endoplasmic reticulum resident protein 44 OS=Homo sapiens OX=9606 GN=ERP44 PE=1 SV=1	11	0.000109393	0.000116067	0.413228	1	0.942497	-0.0854402
ESD	P10768	sp|P10768|ESTD_HUMAN S-formylglutathione hydrolase OS=Homo sapiens OX=9606 GN=ESD PE=1 SV=2	4	5.20113e-05	2.34348e-05	0.211199	1	2.2194	1.15017
ESF1	Q9H501	sp|Q9H501|ESF1_HUMAN ESF1 homolog OS=Homo sapiens OX=9606 GN=ESF1 PE=1 SV=1	5	2.49614e-06	6.15394e-08	2.46519e-05	4	40.5617	5.34204
ESYT1	Q9BSJ8	sp|Q9BSJ8|ESYT1_HUMAN Extended synaptotagmin-1 OS=Homo sapiens OX=9606 GN=ESYT1 PE=1 SV=1	35	0.000233703	0.000265718	0.371818	1	0.879515	-0.18522
ESYT2	A0FGR8	sp|A0FGR8|ESYT2_HUMAN Extended synaptotagmin-2 OS=Homo sapiens OX=9606 GN=ESYT2 PE=1 SV=1	23	6.69284e-05	8.8757e-05	0.285393	1	0.754063	-0.407242
ETF1	P62495	sp|P62495|ERF1_HUMAN Eukaryotic peptide chain release factor subunit 1 OS=Homo sapiens OX=9606 GN=ETF1 PE=1 SV=3	15	0.000158122	0.000136918	0.472062	1	1.15486	0.207724
ETFA	P13804	sp|P13804|ETFA_HUMAN Electron transfer flavoprotein subunit alpha, mitochondrial OS=Homo sapiens OX=9606 GN=ETFA PE=1 SV=1	13	0.000231714	0.000271253	0.35476	1	0.854233	-0.227298
ETFB	P38117	sp|P38117|ETFB_HUMAN Electron transfer flavoprotein subunit beta OS=Homo sapiens OX=9606 GN=ETFB PE=1 SV=3	11	0.000122321	0.000153526	0.315229	1	0.796746	-0.327809
ETFDH	Q16134	sp|Q16134|ETFD_HUMAN Electron transfer flavoprotein-ubiquinone oxidoreductase, mitochondrial OS=Homo sapiens OX=9606 GN=ETFDH PE=1 SV=2	5	5.4398e-06	1.48359e-06	0.0861324	1	3.66665	1.87446
ETHE1	O95571	sp|O95571|ETHE1_HUMAN Persulfide dioxygenase ETHE1, mitochondrial OS=Homo sapiens OX=9606 GN=ETHE1 PE=1 SV=2	3	4.54477e-06	2.8417e-05	0.00142345	3	0.159931	-2.64448
EVI2B	P34910	sp|P34910|EVI2B_HUMAN Protein EVI2B OS=Homo sapiens OX=9606 GN=EVI2B PE=1 SV=2	2	2.9536e-06	7.30723e-06	0.0619326	1	0.404203	-1.30685
EWSR1	Q01844	sp|Q01844|EWS_HUMAN RNA-binding protein EWS OS=Homo sapiens OX=9606 GN=EWSR1 PE=1 SV=1	6	0.000151161	0.00015371	0.439194	1	0.983414	-0.0241289
EXOC1	Q9NV70	sp|Q9NV70|EXOC1_HUMAN Exocyst complex component 1 OS=Homo sapiens OX=9606 GN=EXOC1 PE=1 SV=4	7	5.46964e-06	3.46909e-06	0.337594	1	1.57668	0.656887
EXOC2	Q96KP1	sp|Q96KP1|EXOC2_HUMAN Exocyst complex component 2 OS=Homo sapiens OX=9606 GN=EXOC2 PE=1 SV=1	6	5.11162e-06	4.6316e-06	0.492327	1	1.10364	0.142269
EXOC3	O60645	sp|O60645|EXOC3_HUMAN Exocyst complex component 3 OS=Homo sapiens OX=9606 GN=EXOC3 PE=1 SV=3	3	1.06409e-06	1.09239e-06	0.433347	1	0.974092	-0.0378701
EXOC4	Q96A65	sp|Q96A65|EXOC4_HUMAN Exocyst complex component 4 OS=Homo sapiens OX=9606 GN=EXOC4 PE=1 SV=1	11	6.13594e-06	5.60959e-06	0.496319	1	1.09383	0.129387
EXOC5	O00471	sp|O00471|EXOC5_HUMAN Exocyst complex component 5 OS=Homo sapiens OX=9606 GN=EXOC5 PE=1 SV=1	4	2.01879e-06	6.15394e-08	6.64526e-05	4	32.8049	5.03584
EXOC7	Q9UPT5	sp|Q9UPT5|EXOC7_HUMAN Exocyst complex component 7 OS=Homo sapiens OX=9606 GN=EXOC7 PE=1 SV=3	8	2.73482e-06	4.53934e-06	0.179651	1	0.60247	-0.731039
EXOC8	Q8IYI6	sp|Q8IYI6|EXOC8_HUMAN Exocyst complex component 8 OS=Homo sapiens OX=9606 GN=EXOC8 PE=1 SV=2	2	3.31659e-08	6.15394e-08	0.137773	1	0.538937	-0.891812
EXOSC1	Q9Y3B2	sp|Q9Y3B2|EXOS1_HUMAN Exosome complex component CSL4 OS=Homo sapiens OX=9606 GN=EXOSC1 PE=1 SV=1	1	1.63095e-05	1.46514e-05	0.488484	1	1.11317	0.154673
EXOSC10	Q01780	sp|Q01780|EXOSX_HUMAN Exosome component 10 OS=Homo sapiens OX=9606 GN=EXOSC10 PE=1 SV=2	13	1.09393e-05	8.65427e-06	0.431985	1	1.26403	0.338032
EXOSC2	Q13868	sp|Q13868|EXOS2_HUMAN Exosome complex component RRP4 OS=Homo sapiens OX=9606 GN=EXOSC2 PE=1 SV=2	7	6.84202e-05	2.15896e-05	0.114774	1	3.16913	1.66409
EXOSC3	Q9NQT5	sp|Q9NQT5|EXOS3_HUMAN Exosome complex component RRP40 OS=Homo sapiens OX=9606 GN=EXOSC3 PE=1 SV=3	5	3.33151e-05	3.83814e-05	0.364076	1	0.867999	-0.204234
EXOSC4	Q9NPD3	sp|Q9NPD3|EXOS4_HUMAN Exosome complex component RRP41 OS=Homo sapiens OX=9606 GN=EXOSC4 PE=1 SV=3	6	5.19118e-05	3.37683e-05	0.348014	1	1.5373	0.620394
EXOSC5	Q9NQT4	sp|Q9NQT4|EXOS5_HUMAN Exosome complex component RRP46 OS=Homo sapiens OX=9606 GN=EXOSC5 PE=1 SV=1	5	1.72045e-05	2.89706e-06	0.0283629	2	5.9386	2.57012
EXOSC6	Q5RKV6	sp|Q5RKV6|EXOS6_HUMAN Exosome complex component MTR3 OS=Homo sapiens OX=9606 GN=EXOSC6 PE=1 SV=1	7	4.36576e-05	4.13338e-05	0.483369	1	1.05622	0.0789104
EXOSC7	Q15024	sp|Q15024|EXOS7_HUMAN Exosome complex component RRP42 OS=Homo sapiens OX=9606 GN=EXOSC7 PE=1 SV=3	3	1.06409e-05	8.4882e-06	0.435635	1	1.25361	0.326093
EXOSC8	Q96B26	sp|Q96B26|EXOS8_HUMAN Exosome complex component RRP43 OS=Homo sapiens OX=9606 GN=EXOSC8 PE=1 SV=1	4	2.73482e-05	2.38039e-05	0.474374	1	1.1489	0.200249
EXOSC9	Q06265	sp|Q06265|EXOS9_HUMAN Exosome complex component RRP45 OS=Homo sapiens OX=9606 GN=EXOSC9 PE=1 SV=3	5	3.78897e-05	1.91907e-05	0.251064	1	1.97437	0.981396
EXT1	Q16394	sp|Q16394|EXT1_HUMAN Exostosin-1 OS=Homo sapiens OX=9606 GN=EXT1 PE=1 SV=2	2	1.49172e-06	9.15249e-07	0.324118	1	1.62985	0.704739
EXT2	Q93063	sp|Q93063|EXT2_HUMAN Exostosin-2 OS=Homo sapiens OX=9606 GN=EXT2 PE=1 SV=1	6	1.67072e-06	2.82325e-06	0.172428	1	0.591774	-0.756882
EZH2	Q15910	sp|Q15910|EZH2_HUMAN Histone-lysine N-methyltransferase EZH2 OS=Homo sapiens OX=9606 GN=EZH2 PE=1 SV=2	3	1.84973e-06	1.99288e-06	0.403954	1	0.928169	-0.107541
EZR	P15311	sp|P15311|EZRI_HUMAN Ezrin OS=Homo sapiens OX=9606 GN=EZR PE=1 SV=4	18	0.000547958	0.000317385	0.301264	1	1.72648	0.787832
F10	P00742	sp|P00742|FA10_HUMAN Coagulation factor X OS=Homo sapiens OX=9606 GN=F10 PE=1 SV=2	2	3.31659e-08	8.56201e-07	1.03025e-07	4	0.0387361	-4.69018
F3	P13726	sp|P13726|TF_HUMAN Tissue factor OS=Homo sapiens OX=9606 GN=F3 PE=1 SV=1	10	0.000378897	0.000431791	0.370467	1	0.8775	-0.188529
FABP5	Q01469	sp|Q01469|FABP5_HUMAN Fatty acid-binding protein 5 OS=Homo sapiens OX=9606 GN=FABP5 PE=1 SV=3	5	3.14255e-05	2.38039e-05	0.41292	1	1.32019	0.400742
FADD	Q13158	sp|Q13158|FADD_HUMAN FAS-associated death domain protein OS=Homo sapiens OX=9606 GN=FADD PE=1 SV=1	2	4.53482e-05	1.88217e-05	0.185577	1	2.40936	1.26865
FADS1	O60427	sp|O60427|FADS1_HUMAN Acyl-CoA (8-3)-desaturase OS=Homo sapiens OX=9606 GN=FADS1 PE=1 SV=3	2	3.31659e-08	6.15394e-08	0.137773	1	0.538937	-0.891812
FADS2	O95864	sp|O95864|FADS2_HUMAN Acyl-CoA 6-desaturase OS=Homo sapiens OX=9606 GN=FADS2 PE=1 SV=1	4	1.87957e-06	8.1007e-06	0.00811149	3	0.232025	-2.10765
FADS3	Q9Y5Q0	sp|Q9Y5Q0|FADS3_HUMAN Fatty acid desaturase 3 OS=Homo sapiens OX=9606 GN=FADS3 PE=1 SV=1	1	3.31659e-08	6.15394e-08	0.137773	1	0.538937	-0.891812
FAF1	Q9UNN5	sp|Q9UNN5|FAF1_HUMAN FAS-associated factor 1 OS=Homo sapiens OX=9606 GN=FAF1 PE=1 SV=2	8	1.55139e-05	8.56201e-06	0.282672	1	1.81194	0.857537
FAF2	Q96CS3	sp|Q96CS3|FAF2_HUMAN FAS-associated factor 2 OS=Homo sapiens OX=9606 GN=FAF2 PE=1 SV=2	8	3.85858e-05	7.51021e-05	0.122031	1	0.513778	-0.960784
FAH	P16930	sp|P16930|FAAA_HUMAN Fumarylacetoacetase OS=Homo sapiens OX=9606 GN=FAH PE=1 SV=2	5	1.12376e-05	1.00751e-05	0.487596	1	1.11538	0.157538
FAHD1	Q6P587	sp|Q6P587|FAHD1_HUMAN Acylpyruvase FAHD1, mitochondrial OS=Homo sapiens OX=9606 GN=FAHD1 PE=1 SV=2	2	6.44422e-06	6.6983e-06	0.425746	1	0.962069	-0.0557876
FAHD2A	Q96GK7	sp|Q96GK7|FAH2A_HUMAN Fumarylacetoacetate hydrolase domain-containing protein 2A OS=Homo sapiens OX=9606 GN=FAHD2A PE=1 SV=1;sp|Q6P2I3|FAH2B_HUMAN Fumarylacetoacetate hydrolase domain-containing protein 2B OS=Homo sapiens OX=9606 GN=FAHD2B PE=1 SV=1	2	9.46744e-06	6.15394e-08	1.4034e-08	4	153.843	7.26532
FAM107B	Q9H098	sp|Q9H098|F107B_HUMAN Protein FAM107B OS=Homo sapiens OX=9606 GN=FAM107B PE=1 SV=1	2	2.30719e-05	1.60907e-05	0.377283	1	1.43387	0.519913
FAM114A1	Q8IWE2	sp|Q8IWE2|NXP20_HUMAN Protein NOXP20 OS=Homo sapiens OX=9606 GN=FAM114A1 PE=1 SV=2	10	6.58345e-05	3.37683e-05	0.255593	1	1.9496	0.963176
FAM120A	Q9NZB2	sp|Q9NZB2|F120A_HUMAN Constitutive coactivator of PPAR-gamma-like protein 1 OS=Homo sapiens OX=9606 GN=FAM120A PE=1 SV=2	24	3.46079e-05	3.21075e-05	0.495982	1	1.07787	0.108188
FAM120B	Q96EK7	sp|Q96EK7|F120B_HUMAN Constitutive coactivator of peroxisome proliferator-activated receptor gamma OS=Homo sapiens OX=9606 GN=FAM120B PE=1 SV=1	4	1.9094e-06	6.15394e-08	8.54434e-05	4	31.0272	4.95546
FAM120C	Q9NX05	sp|Q9NX05|F120C_HUMAN Constitutive coactivator of PPAR-gamma-like protein 2 OS=Homo sapiens OX=9606 GN=FAM120C PE=1 SV=3	1	3.31659e-08	6.15394e-08	0.137773	1	0.538937	-0.891812
FAM131A	Q6UXB0	sp|Q6UXB0|F131A_HUMAN Protein FAM131A OS=Homo sapiens OX=9606 GN=FAM131A PE=2 SV=2	1	2.99338e-05	6.51377e-05	0.0903261	1	0.459547	-1.12172
FAM136A	Q96C01	sp|Q96C01|F136A_HUMAN Protein FAM136A OS=Homo sapiens OX=9606 GN=FAM136A PE=1 SV=1	4	2.32708e-05	3.1923e-05	0.267744	1	0.728967	-0.456075
FAM162A	Q96A26	sp|Q96A26|F162A_HUMAN Protein FAM162A OS=Homo sapiens OX=9606 GN=FAM162A PE=1 SV=2	3	7.37903e-05	0.000126585	0.166503	1	0.582932	-0.778601
FAM20B	O75063	sp|O75063|XYLK_HUMAN Glycosaminoglycan xylosylkinase OS=Homo sapiens OX=9606 GN=FAM20B PE=1 SV=1	1	3.31659e-08	6.15394e-08	0.137773	1	0.538937	-0.891812
FAM210A	Q96ND0	sp|Q96ND0|F210A_HUMAN Protein FAM210A OS=Homo sapiens OX=9606 GN=FAM210A PE=1 SV=2	3	2.2873e-05	3.78278e-05	0.181137	1	0.604661	-0.725802
FAM3C	Q92520	sp|Q92520|FAM3C_HUMAN Protein FAM3C OS=Homo sapiens OX=9606 GN=FAM3C PE=1 SV=1	12	0.000276465	0.000254646	0.499661	1	1.08568	0.118605
FAM49B	Q9NUQ9	sp|Q9NUQ9|FA49B_HUMAN Protein FAM49B OS=Homo sapiens OX=9606 GN=FAM49B PE=1 SV=1	8	3.70941e-05	7.06735e-05	0.128898	1	0.524865	-0.929981
FAM50A	Q14320	sp|Q14320|FA50A_HUMAN Protein FAM50A OS=Homo sapiens OX=9606 GN=FAM50A PE=1 SV=2;sp|Q9Y247|FA50B_HUMAN Protein FAM50B OS=Homo sapiens OX=9606 GN=FAM50B PE=1 SV=1	6	6.79229e-05	2.4911e-05	0.150811	1	2.72662	1.44711
FAM91A1	Q658Y4	sp|Q658Y4|F91A1_HUMAN Protein FAM91A1 OS=Homo sapiens OX=9606 GN=FAM91A1 PE=1 SV=3	7	4.00775e-06	2.02979e-06	0.251047	1	1.97447	0.981464
FAM98A	Q8NCA5	sp|Q8NCA5|FA98A_HUMAN Protein FAM98A OS=Homo sapiens OX=9606 GN=FAM98A PE=1 SV=2	6	3.55029e-05	2.4542e-05	0.373519	1	1.44662	0.532686
FAM98B	Q52LJ0	sp|Q52LJ0|FA98B_HUMAN Protein FAM98B OS=Homo sapiens OX=9606 GN=FAM98B PE=1 SV=2	4	2.18785e-05	1.43561e-05	0.351623	1	1.52399	0.60785
FAR1	Q8WVX9	sp|Q8WVX9|FACR1_HUMAN Fatty acyl-CoA reductase 1 OS=Homo sapiens OX=9606 GN=FAR1 PE=1 SV=1	9	3.28178e-05	3.11849e-05	0.481096	1	1.05236	0.073631
FARSA	Q9Y285	sp|Q9Y285|SYFA_HUMAN Phenylalanine--tRNA ligase alpha subunit OS=Homo sapiens OX=9606 GN=FARSA PE=1 SV=3	12	9.52711e-05	8.74654e-05	0.498197	1	1.08924	0.123327
FARSB	Q9NSD9	sp|Q9NSD9|SYFB_HUMAN Phenylalanine--tRNA ligase beta subunit OS=Homo sapiens OX=9606 GN=FARSB PE=1 SV=3	16	5.87737e-05	3.81969e-05	0.347635	1	1.5387	0.621716
FASN	P49327	sp|P49327|FAS_HUMAN Fatty acid synthase OS=Homo sapiens OX=9606 GN=FASN PE=1 SV=3	80	0.00015315	0.000105364	0.3715	1	1.45352	0.539556
FASTKD2	Q9NYY8	sp|Q9NYY8|FAKD2_HUMAN FAST kinase domain-containing protein 2, mitochondrial OS=Homo sapiens OX=9606 GN=FASTKD2 PE=1 SV=1	4	8.14478e-07	6.15394e-08	0.00252649	3	13.2351	3.72629
FASTKD5	Q7L8L6	sp|Q7L8L6|FAKD5_HUMAN FAST kinase domain-containing protein 5, mitochondrial OS=Homo sapiens OX=9606 GN=FASTKD5 PE=1 SV=1	1	3.31659e-08	6.15394e-08	0.137773	1	0.538937	-0.891812
FAU	P62861	sp|P62861|RS30_HUMAN 40S ribosomal protein S30 OS=Homo sapiens OX=9606 GN=FAU PE=1 SV=1	2	0.00131271	0.00120865	0.499489	1	1.0861	0.119159
FBL	P22087	sp|P22087|FBRL_HUMAN rRNA 2-O-methyltransferase fibrillarin OS=Homo sapiens OX=9606 GN=FBL PE=1 SV=2	11	0.000275471	0.000400422	0.238881	1	0.687952	-0.539621
FBLL1	A6NHQ2	sp|A6NHQ2|FBLL1_HUMAN rRNA/tRNA 2-O-methyltransferase fibrillarin-like protein 1 OS=Homo sapiens OX=9606 GN=FBLL1 PE=3 SV=2	1	5.44975e-05	6.15394e-08	2.84893e-14	4	885.569	9.79046
FBXL18	Q96ME1	sp|Q96ME1|FXL18_HUMAN F-box/LRR-repeat protein 18 OS=Homo sapiens OX=9606 GN=FBXL18 PE=1 SV=2	1	3.31659e-08	6.15394e-08	0.137773	1	0.538937	-0.891812
FBXL20	Q96IG2	sp|Q96IG2|FXL20_HUMAN F-box/LRR-repeat protein 20 OS=Homo sapiens OX=9606 GN=FBXL20 PE=1 SV=2	1	3.31659e-08	6.15394e-08	0.137773	1	0.538937	-0.891812
FBXO7	Q9Y3I1	sp|Q9Y3I1|FBX7_HUMAN F-box only protein 7 OS=Homo sapiens OX=9606 GN=FBXO7 PE=1 SV=1	1	2.21769e-06	6.15394e-08	4.31258e-05	4	36.0369	5.1714
FDPS	P14324	sp|P14324|FPPS_HUMAN Farnesyl pyrophosphate synthase OS=Homo sapiens OX=9606 GN=FDPS PE=1 SV=4	5	6.29505e-05	3.48754e-05	0.284127	1	1.80501	0.852007
FDXR	P22570	sp|P22570|ADRO_HUMAN NADPH:adrenodoxin oxidoreductase, mitochondrial OS=Homo sapiens OX=9606 GN=FDXR PE=1 SV=3	5	3.31659e-08	7.82391e-07	2.17132e-07	4	0.0423904	-4.56012
FECH	P22830	sp|P22830|HEMH_HUMAN Ferrochelatase, mitochondrial OS=Homo sapiens OX=9606 GN=FECH PE=1 SV=2	3	3.31659e-08	2.62027e-06	2.00135e-12	4	0.0126574	-6.30387
FEN1	P39748	sp|P39748|FEN1_HUMAN Flap endonuclease 1 OS=Homo sapiens OX=9606 GN=FEN1 PE=1 SV=1	10	0.000148177	0.000121418	0.447516	1	1.22039	0.287341
FERMT2	Q96AC1	sp|Q96AC1|FERM2_HUMAN Fermitin family homolog 2 OS=Homo sapiens OX=9606 GN=FERMT2 PE=1 SV=1	12	3.85858e-05	2.8048e-05	0.395038	1	1.37571	0.460174
FH	P07954	sp|P07954|FUMH_HUMAN Fumarate hydratase, mitochondrial OS=Homo sapiens OX=9606 GN=FH PE=1 SV=3	17	0.000335139	0.000304468	0.493504	1	1.10074	0.138471
FHL2	Q14192	sp|Q14192|FHL2_HUMAN Four and a half LIM domains protein 2 OS=Homo sapiens OX=9606 GN=FHL2 PE=1 SV=3	8	6.56356e-05	3.57981e-05	0.278207	1	1.8335	0.874598
FHOD1	Q9Y613	sp|Q9Y613|FHOD1_HUMAN FH1/FH2 domain-containing protein 1 OS=Homo sapiens OX=9606 GN=FHOD1 PE=1 SV=3	5	2.45636e-06	2.89706e-06	0.35044	1	0.847882	-0.238065
FIBP	O43427	sp|O43427|FIBP_HUMAN Acidic fibroblast growth factor intracellular-binding protein OS=Homo sapiens OX=9606 GN=FIBP PE=1 SV=3	3	3.31659e-08	1.36549e-06	1.59725e-09	4	0.0242886	-5.36358
FIP1L1	Q6UN15	sp|Q6UN15|FIP1_HUMAN Pre-mRNA 3-end-processing factor FIP1 OS=Homo sapiens OX=9606 GN=FIP1L1 PE=1 SV=1	4	1.46188e-05	1.54448e-05	0.415815	1	0.94652	-0.0792952
FIS1	Q9Y3D6	sp|Q9Y3D6|FIS1_HUMAN Mitochondrial fission 1 protein OS=Homo sapiens OX=9606 GN=FIS1 PE=1 SV=2	3	0.000146188	0.000168657	0.363254	1	0.86678	-0.206262
FITM2	Q8N6M3	sp|Q8N6M3|FITM2_HUMAN Fat storage-inducing transmembrane protein 2 OS=Homo sapiens OX=9606 GN=FITM2 PE=1 SV=1	2	3.31659e-08	6.15394e-08	0.137773	1	0.538937	-0.891812
FKBP15	Q5T1M5	sp|Q5T1M5|FKB15_HUMAN FK506-binding protein 15 OS=Homo sapiens OX=9606 GN=FKBP15 PE=1 SV=2	1	6.99119e-07	6.15394e-08	0.00423849	3	11.3605	3.50595
FKBP1A	P62942	sp|P62942|FKB1A_HUMAN Peptidyl-prolyl cis-trans isomerase FKBP1A OS=Homo sapiens OX=9606 GN=FKBP1A PE=1 SV=2	7	0.00155139	0.00141162	0.494207	1	1.09901	0.136203
FKBP2	P26885	sp|P26885|FKBP2_HUMAN Peptidyl-prolyl cis-trans isomerase FKBP2 OS=Homo sapiens OX=9606 GN=FKBP2 PE=1 SV=2	6	0.000312266	0.00031554	0.443066	1	0.989627	-0.0150436
FKBP3	Q00688	sp|Q00688|FKBP3_HUMAN Peptidyl-prolyl cis-trans isomerase FKBP3 OS=Homo sapiens OX=9606 GN=FKBP3 PE=1 SV=1	7	0.000282432	0.000204824	0.394037	1	1.3789	0.463519
FKBP4	Q02790	sp|Q02790|FKBP4_HUMAN Peptidyl-prolyl cis-trans isomerase FKBP4 OS=Homo sapiens OX=9606 GN=FKBP4 PE=1 SV=3	22	0.000178012	9.02333e-05	0.251349	1	1.9728	0.980241
FKBP5	Q13451	sp|Q13451|FKBP5_HUMAN Peptidyl-prolyl cis-trans isomerase FKBP5 OS=Homo sapiens OX=9606 GN=FKBP5 PE=1 SV=2	12	4.08731e-05	3.57981e-05	0.477152	1	1.14177	0.19127
FKBP7	Q9Y680	sp|Q9Y680|FKBP7_HUMAN Peptidyl-prolyl cis-trans isomerase FKBP7 OS=Homo sapiens OX=9606 GN=FKBP7 PE=1 SV=2	2	3.31659e-08	6.15394e-08	0.137773	1	0.538937	-0.891812
FKBP8	Q14318	sp|Q14318|FKBP8_HUMAN Peptidyl-prolyl cis-trans isomerase FKBP8 OS=Homo sapiens OX=9606 GN=FKBP8 PE=1 SV=2	7	1.82984e-05	1.71425e-05	0.48993	1	1.06743	0.0941434
FKBP9	O95302	sp|O95302|FKBP9_HUMAN Peptidyl-prolyl cis-trans isomerase FKBP9 OS=Homo sapiens OX=9606 GN=FKBP9 PE=1 SV=2	9	2.9536e-05	4.15184e-05	0.255373	1	0.711397	-0.491274
FKRP	Q9H9S5	sp|Q9H9S5|FKRP_HUMAN Fukutin-related protein OS=Homo sapiens OX=9606 GN=FKRP PE=1 SV=1	1	3.31659e-08	1.04811e-06	1.80445e-08	4	0.0316436	-4.98194
FLAD1	Q8NFF5	sp|Q8NFF5|FAD1_HUMAN FAD synthase OS=Homo sapiens OX=9606 GN=FLAD1 PE=1 SV=1	1	3.31659e-08	6.15394e-08	0.137773	1	0.538937	-0.891812
FLII	Q13045	sp|Q13045|FLII_HUMAN Protein flightless-1 homolog OS=Homo sapiens OX=9606 GN=FLII PE=1 SV=2	24	3.12266e-05	4.05957e-05	0.296014	1	0.76921	-0.378551
FLNA	P21333	sp|P21333|FLNA_HUMAN Filamin-A OS=Homo sapiens OX=9606 GN=FLNA PE=1 SV=4	116	0.00120332	0.000935547	0.424331	1	1.28622	0.363138
FLNB	O75369	sp|O75369|FLNB_HUMAN Filamin-B OS=Homo sapiens OX=9606 GN=FLNB PE=1 SV=2	133	0.00142211	0.00121787	0.467136	1	1.1677	0.223665
FLNC	Q14315	sp|Q14315|FLNC_HUMAN Filamin-C OS=Homo sapiens OX=9606 GN=FLNC PE=1 SV=3	110	0.000336134	0.000234348	0.377145	1	1.43434	0.520383
FLOT1	O75955	sp|O75955|FLOT1_HUMAN Flotillin-1 OS=Homo sapiens OX=9606 GN=FLOT1 PE=1 SV=3	14	0.000125304	0.000121418	0.468976	1	1.03201	0.0454524
FLOT2	Q14254	sp|Q14254|FLOT2_HUMAN Flotillin-2 OS=Homo sapiens OX=9606 GN=FLOT2 PE=1 SV=2	18	0.000122321	0.000117359	0.475122	1	1.04228	0.0597478
FMNL1	O95466	sp|O95466|FMNL1_HUMAN Formin-like protein 1 OS=Homo sapiens OX=9606 GN=FMNL1 PE=1 SV=3	6	5.16135e-06	6.15394e-08	5.4924e-07	4	83.8705	6.39009
FMR1	Q06787	sp|Q06787|FMR1_HUMAN Synaptic functional regulator FMR1 OS=Homo sapiens OX=9606 GN=FMR1 PE=1 SV=1	2	3.20222e-06	6.15394e-08	7.18608e-06	4	52.0353	5.70142
FN1	P02751	sp|P02751|FINC_HUMAN Fibronectin OS=Homo sapiens OX=9606 GN=FN1 PE=1 SV=4	16	3.7293e-06	5.00066e-06	0.27956	1	0.745761	-0.423214
FN3KRP	Q9HA64	sp|Q9HA64|KT3K_HUMAN Ketosamine-3-kinase OS=Homo sapiens OX=9606 GN=FN3KRP PE=1 SV=2	2	1.50166e-05	6.14472e-06	0.18135	1	2.44383	1.28914
FNBP1	Q96RU3	sp|Q96RU3|FNBP1_HUMAN Formin-binding protein 1 OS=Homo sapiens OX=9606 GN=FNBP1 PE=1 SV=2	4	1.00442e-05	4.79768e-06	0.230609	1	2.09356	1.06596
FNDC3A	Q9Y2H6	sp|Q9Y2H6|FND3A_HUMAN Fibronectin type-III domain-containing protein 3A OS=Homo sapiens OX=9606 GN=FNDC3A PE=1 SV=4	1	3.31659e-08	6.15394e-08	0.137773	1	0.538937	-0.891812
FNDC3B	Q53EP0	sp|Q53EP0|FND3B_HUMAN Fibronectin type III domain-containing protein 3B OS=Homo sapiens OX=9606 GN=FNDC3B PE=1 SV=2	8	1.26299e-05	9.5769e-06	0.413383	1	1.31879	0.39921
FNTA	P49354	sp|P49354|FNTA_HUMAN Protein farnesyltransferase/geranylgeranyltransferase type-1 subunit alpha OS=Homo sapiens OX=9606 GN=FNTA PE=1 SV=1	2	6.49395e-06	6.3477e-06	0.463569	1	1.02304	0.0328626
FOSL1	P15407	sp|P15407|FOSL1_HUMAN Fos-related antigen 1 OS=Homo sapiens OX=9606 GN=FOSL1 PE=1 SV=1	3	1.02431e-05	2.30658e-05	0.0819469	1	0.444084	-1.1711
FOSL2	P15408	sp|P15408|FOSL2_HUMAN Fos-related antigen 2 OS=Homo sapiens OX=9606 GN=FOSL2 PE=1 SV=1	1	3.31659e-08	7.21497e-06	8.27793e-18	4	0.00459681	-7.76515
FOXK1	P85037	sp|P85037|FOXK1_HUMAN Forkhead box protein K1 OS=Homo sapiens OX=9606 GN=FOXK1 PE=1 SV=1	6	6.24533e-06	2.21431e-06	0.142113	1	2.82044	1.49592
FOXRED1	Q96CU9	sp|Q96CU9|FXRD1_HUMAN FAD-dependent oxidoreductase domain-containing protein 1 OS=Homo sapiens OX=9606 GN=FOXRED1 PE=1 SV=2	4	5.77792e-06	1.93752e-05	0.0220716	2	0.298212	-1.74559
FRMD6	Q96NE9	sp|Q96NE9|FRMD6_HUMAN FERM domain-containing protein 6 OS=Homo sapiens OX=9606 GN=FRMD6 PE=1 SV=1	8	4.35582e-06	4.42863e-06	0.439284	1	0.98356	-0.0239154
FRYL	O94915	sp|O94915|FRYL_HUMAN Protein furry homolog-like OS=Homo sapiens OX=9606 GN=FRYL PE=1 SV=2	8	1.2431e-06	7.47331e-07	0.315955	1	1.66339	0.734122
FSCN1	Q16658	sp|Q16658|FSCN1_HUMAN Fascin OS=Homo sapiens OX=9606 GN=FSCN1 PE=1 SV=3	4	7.55804e-06	6.15394e-08	5.77052e-08	4	122.816	6.94036
FSTL1	Q12841	sp|Q12841|FSTL1_HUMAN Follistatin-related protein 1 OS=Homo sapiens OX=9606 GN=FSTL1 PE=1 SV=1	4	1.50166e-06	1.69949e-06	0.374552	1	0.883599	-0.178536
FTH1	P02794	sp|P02794|FRIH_HUMAN Ferritin heavy chain OS=Homo sapiens OX=9606 GN=FTH1 PE=1 SV=2	6	5.32046e-05	3.63516e-05	0.368573	1	1.46361	0.549531
FTL	P02792	sp|P02792|FRIL_HUMAN Ferritin light chain OS=Homo sapiens OX=9606 GN=FTL PE=1 SV=2	4	5.73814e-06	6.15394e-08	2.99002e-07	4	93.2433	6.54293
FTO	Q9C0B1	sp|Q9C0B1|FTO_HUMAN Alpha-ketoglutarate-dependent dioxygenase FTO OS=Homo sapiens OX=9606 GN=FTO PE=1 SV=3	1	2.79449e-06	2.87861e-06	0.431258	1	0.970777	-0.0427877
FTSJ3	Q8IY81	sp|Q8IY81|SPB1_HUMAN pre-rRNA 2-O-ribose RNA methyltransferase FTSJ3 OS=Homo sapiens OX=9606 GN=FTSJ3 PE=1 SV=2	16	7.4387e-05	7.41795e-05	0.451215	1	1.0028	0.00403095
FUBP1	Q96AE4	sp|Q96AE4|FUBP1_HUMAN Far upstream element-binding protein 1 OS=Homo sapiens OX=9606 GN=FUBP1 PE=1 SV=3	16	8.54258e-05	0.000100751	0.350445	1	0.847888	-0.238055
FUBP3	Q96I24	sp|Q96I24|FUBP3_HUMAN Far upstream element-binding protein 3 OS=Homo sapiens OX=9606 GN=FUBP3 PE=1 SV=2	10	4.42543e-05	5.40661e-05	0.33031	1	0.818522	-0.288907
FUCA1	P04066	sp|P04066|FUCO_HUMAN Tissue alpha-L-fucosidase OS=Homo sapiens OX=9606 GN=FUCA1 PE=1 SV=4	6	1.51161e-05	4.04112e-06	0.0826701	1	3.74057	1.90326
FUCA2	Q9BTY2	sp|Q9BTY2|FUCO2_HUMAN Plasma alpha-L-fucosidase OS=Homo sapiens OX=9606 GN=FUCA2 PE=1 SV=2	1	2.42653e-06	6.15394e-08	2.82224e-05	4	39.4305	5.30124
FUNDC1	Q8IVP5	sp|Q8IVP5|FUND1_HUMAN FUN14 domain-containing protein 1 OS=Homo sapiens OX=9606 GN=FUNDC1 PE=1 SV=1	1	3.31659e-08	6.15394e-08	0.137773	1	0.538937	-0.891812
FUNDC2	Q9BWH2	sp|Q9BWH2|FUND2_HUMAN FUN14 domain-containing protein 2 OS=Homo sapiens OX=9606 GN=FUNDC2 PE=1 SV=2	4	2.63537e-05	2.58337e-05	0.461806	1	1.02013	0.0287537
FUS	P35637	sp|P35637|FUS_HUMAN RNA-binding protein FUS OS=Homo sapiens OX=9606 GN=FUS PE=1 SV=1	8	0.00067724	0.000690128	0.437888	1	0.981326	-0.0271953
FUT8	Q9BYC5	sp|Q9BYC5|FUT8_HUMAN Alpha-(1,6)-fucosyltransferase OS=Homo sapiens OX=9606 GN=FUT8 PE=1 SV=2	3	4.62433e-06	2.38039e-06	0.256876	1	1.94268	0.958048
FXR1	P51114	sp|P51114|FXR1_HUMAN Fragile X mental retardation syndrome-related protein 1 OS=Homo sapiens OX=9606 GN=FXR1 PE=1 SV=3	19	0.000123315	0.000137287	0.384291	1	0.898228	-0.154846
FXR2	P51116	sp|P51116|FXR2_HUMAN Fragile X mental retardation syndrome-related protein 2 OS=Homo sapiens OX=9606 GN=FXR2 PE=1 SV=2	10	2.99338e-05	3.00778e-05	0.446534	1	0.995215	-0.0069203
FZD2	Q14332	sp|Q14332|FZD2_HUMAN Frizzled-2 OS=Homo sapiens OX=9606 GN=FZD2 PE=1 SV=1;sp|O75084|FZD7_HUMAN Frizzled-7 OS=Homo sapiens OX=9606 GN=FZD7 PE=1 SV=2	2	3.31659e-08	2.8048e-06	9.39697e-13	4	0.0118247	-6.40205
G3BP1	Q13283	sp|Q13283|G3BP1_HUMAN Ras GTPase-activating protein-binding protein 1 OS=Homo sapiens OX=9606 GN=G3BP1 PE=1 SV=1	15	0.000329173	0.000276789	0.458992	1	1.18925	0.250057
G3BP2	Q9UN86	sp|Q9UN86|G3BP2_HUMAN Ras GTPase-activating protein-binding protein 2 OS=Homo sapiens OX=9606 GN=G3BP2 PE=1 SV=2	6	3.48068e-05	2.8048e-05	0.440111	1	1.24097	0.311472
G6PC3	Q9BUM1	sp|Q9BUM1|G6PC3_HUMAN Glucose-6-phosphatase 3 OS=Homo sapiens OX=9606 GN=G6PC3 PE=1 SV=2	3	1.60111e-05	6.15394e-08	4.0748e-10	4	260.176	8.02335
G6PD	P11413	sp|P11413|G6PD_HUMAN Glucose-6-phosphate 1-dehydrogenase OS=Homo sapiens OX=9606 GN=G6PD PE=1 SV=4	29	0.000451494	0.000405957	0.488885	1	1.11217	0.153377
GAA	P10253	sp|P10253|LYAG_HUMAN Lysosomal alpha-glucosidase OS=Homo sapiens OX=9606 GN=GAA PE=1 SV=4	5	6.32489e-06	3.13694e-06	0.24363	1	2.01626	1.01168
GABARAPL2	P60520	sp|P60520|GBRL2_HUMAN Gamma-aminobutyric acid receptor-associated protein-like 2 OS=Homo sapiens OX=9606 GN=GABARAPL2 PE=1 SV=1;sp|Q9H0R8|GBRL1_HUMAN Gamma-aminobutyric acid receptor-associated protein-like 1 OS=Homo sapiens OX=9606 GN=GABARAPL1 PE=1 SV=1;	2	3.31659e-08	2.47265e-05	8.54252e-26	4	0.00134131	-9.54214
GABPA	Q06546	sp|Q06546|GABPA_HUMAN GA-binding protein alpha chain OS=Homo sapiens OX=9606 GN=GABPA PE=1 SV=1	2	5.83759e-06	6.15394e-08	2.70572e-07	4	94.8594	6.56772
GADD45GIP1	Q8TAE8	sp|Q8TAE8|G45IP_HUMAN Growth arrest and DNA damage-inducible proteins-interacting protein 1 OS=Homo sapiens OX=9606 GN=GADD45GIP1 PE=1 SV=1	5	1.89946e-05	6.67984e-05	0.0184496	2	0.284356	-1.81423
GALC	P54803	sp|P54803|GALC_HUMAN Galactocerebrosidase OS=Homo sapiens OX=9606 GN=GALC PE=1 SV=3	2	2.82432e-06	1.22156e-06	0.198189	1	2.31206	1.20918
GALE	Q14376	sp|Q14376|GALE_HUMAN UDP-glucose 4-epimerase OS=Homo sapiens OX=9606 GN=GALE PE=1 SV=2	9	0.000107404	7.71319e-05	0.389821	1	1.39247	0.477645
GALK1	P51570	sp|P51570|GALK1_HUMAN Galactokinase OS=Homo sapiens OX=9606 GN=GALK1 PE=1 SV=1	7	1.69061e-05	1.61829e-05	0.476553	1	1.04469	0.0630742
GALNT1	Q10472	sp|Q10472|GALT1_HUMAN Polypeptide N-acetylgalactosaminyltransferase 1 OS=Homo sapiens OX=9606 GN=GALNT1 PE=1 SV=1	7	9.19893e-06	8.61737e-06	0.489963	1	1.06749	0.094219
GALNT10	Q86SR1	sp|Q86SR1|GLT10_HUMAN Polypeptide N-acetylgalactosaminyltransferase 10 OS=Homo sapiens OX=9606 GN=GALNT10 PE=1 SV=2	2	1.97901e-06	6.15394e-08	7.27266e-05	4	32.1585	5.00713
GALNT2	Q10471	sp|Q10471|GALT2_HUMAN Polypeptide N-acetylgalactosaminyltransferase 2 OS=Homo sapiens OX=9606 GN=GALNT2 PE=1 SV=1	19	0.000160111	0.000102412	0.341064	1	1.5634	0.644689
GALNT7	Q86SF2	sp|Q86SF2|GALT7_HUMAN N-acetylgalactosaminyltransferase 7 OS=Homo sapiens OX=9606 GN=GALNT7 PE=1 SV=1	11	1.60111e-05	2.76789e-05	0.163522	1	0.578459	-0.789714
GAMT	Q14353	sp|Q14353|GAMT_HUMAN Guanidinoacetate N-methyltransferase OS=Homo sapiens OX=9606 GN=GAMT PE=1 SV=1	2	1.2431e-05	6.15394e-08	2.33791e-09	4	202	7.65821
GANAB	Q14697	sp|Q14697|GANAB_HUMAN Neutral alpha-glucosidase AB OS=Homo sapiens OX=9606 GN=GANAB PE=1 SV=3	46	0.00121326	0.00131383	0.400886	1	0.923459	-0.11488
GAPDH	P04406	sp|P04406|G3P_HUMAN Glyceraldehyde-3-phosphate dehydrogenase OS=Homo sapiens OX=9606 GN=GAPDH PE=1 SV=3	17	0.00920888	0.00636615	0.373543	1	1.44654	0.532604
GAPVD1	Q14C86	sp|Q14C86|GAPD1_HUMAN GTPase-activating protein and VPS9 domain-containing protein 1 OS=Homo sapiens OX=9606 GN=GAPVD1 PE=1 SV=2	13	9.58678e-06	8.1376e-06	0.463191	1	1.17808	0.236443
GAR1	Q9NY12	sp|Q9NY12|GAR1_HUMAN H/ACA ribonucleoprotein complex subunit 1 OS=Homo sapiens OX=9606 GN=GAR1 PE=1 SV=1	6	9.80556e-05	0.000133043	0.273412	1	0.73702	-0.440223
GARS	P41250	sp|P41250|GARS_HUMAN Glycine--tRNA ligase OS=Homo sapiens OX=9606 GN=GARS PE=1 SV=3	22	8.3934e-05	4.17029e-05	0.244256	1	2.01267	1.00911
GART	P22102	sp|P22102|PUR2_HUMAN Trifunctional purine biosynthetic protein adenosine-3 OS=Homo sapiens OX=9606 GN=GART PE=1 SV=1	33	0.000116354	5.01911e-05	0.197359	1	2.31822	1.21302
GATAD2A	Q86YP4	sp|Q86YP4|P66A_HUMAN Transcriptional repressor p66-alpha OS=Homo sapiens OX=9606 GN=GATAD2A PE=1 SV=1;sp|Q8WXI9|P66B_HUMAN Transcriptional repressor p66-beta OS=Homo sapiens OX=9606 GN=GATAD2B PE=1 SV=1	4	7.52821e-06	2.98932e-06	0.172609	1	2.51837	1.33249
GATD3A	P0DPI2	sp|P0DPI2|GAL3A_HUMAN Glutamine amidotransferase-like class 1 domain-containing protein 3A, mitochondrial OS=Homo sapiens OX=9606 GN=GATD3A PE=1 SV=1;sp|A0A0B4J2D5|GAL3B_HUMAN Glutamine amidotransferase-like class 1 domain-containing protein 3B, mitochondr	7	0.000116354	6.034e-05	0.259566	1	1.92831	0.947334
GBA	P04062	sp|P04062|GLCM_HUMAN Lysosomal acid glucosylceramidase OS=Homo sapiens OX=9606 GN=GBA PE=1 SV=3	9	2.76465e-05	4.2441e-05	0.213316	1	0.651411	-0.618361
GBE1	Q04446	sp|Q04446|GLGB_HUMAN 1,4-alpha-glucan-branching enzyme OS=Homo sapiens OX=9606 GN=GBE1 PE=1 SV=3	16	8.70169e-05	4.87149e-05	0.28811	1	1.78625	0.836933
GBF1	Q92538	sp|Q92538|GBF1_HUMAN Golgi-specific brefeldin A-resistance guanine nucleotide exchange factor 1 OS=Homo sapiens OX=9606 GN=GBF1 PE=1 SV=2	13	5.78787e-06	4.72387e-06	0.445758	1	1.22524	0.293064
GBP1	P32455	sp|P32455|GBP1_HUMAN Guanylate-binding protein 1 OS=Homo sapiens OX=9606 GN=GBP1 PE=1 SV=2	10	3.41106e-05	6.99354e-06	0.0460153	2	4.87745	2.28613
GCA	P28676	sp|P28676|GRAN_HUMAN Grancalcin OS=Homo sapiens OX=9606 GN=GCA PE=1 SV=2	4	3.31659e-08	1.27138e-05	2.76218e-21	4	0.00260864	-8.58249
GCDH	Q92947	sp|Q92947|GCDH_HUMAN Glutaryl-CoA dehydrogenase, mitochondrial OS=Homo sapiens OX=9606 GN=GCDH PE=1 SV=1	3	3.80885e-06	6.05246e-06	0.198004	1	0.629307	-0.668163
GCLC	P48506	sp|P48506|GSH1_HUMAN Glutamate--cysteine ligase catalytic subunit OS=Homo sapiens OX=9606 GN=GCLC PE=1 SV=2	5	2.84421e-06	6.15394e-08	1.30418e-05	4	46.2177	5.53037
GCLM	P48507	sp|P48507|GSH0_HUMAN Glutamate--cysteine ligase regulatory subunit OS=Homo sapiens OX=9606 GN=GCLM PE=1 SV=1	5	1.72045e-05	6.15394e-08	2.44556e-10	4	279.568	8.12706
GCN1	Q92616	sp|Q92616|GCN1_HUMAN eIF-2-alpha kinase activator GCN1 OS=Homo sapiens OX=9606 GN=GCN1 PE=1 SV=6	82	5.77792e-05	5.14828e-05	0.484832	1	1.1223	0.166461
GCSH	P23434	sp|P23434|GCSH_HUMAN Glycine cleavage system H protein, mitochondrial OS=Homo sapiens OX=9606 GN=GCSH PE=1 SV=2	1	2.38675e-05	2.91551e-05	0.33039	1	0.818638	-0.288702
GDI1	P31150	sp|P31150|GDIA_HUMAN Rab GDP dissociation inhibitor alpha OS=Homo sapiens OX=9606 GN=GDI1 PE=1 SV=2	11	8.53263e-05	4.90839e-05	0.298588	1	1.73838	0.79774
GDI2	P50395	sp|P50395|GDIB_HUMAN Rab GDP dissociation inhibitor beta OS=Homo sapiens OX=9606 GN=GDI2 PE=1 SV=2	20	0.000616577	0.000522209	0.4622	1	1.18071	0.239654
GEMIN4	P57678	sp|P57678|GEMI4_HUMAN Gem-associated protein 4 OS=Homo sapiens OX=9606 GN=GEMIN4 PE=1 SV=2	11	4.18676e-06	3.04468e-06	0.395227	1	1.37511	0.459542
GEMIN5	Q8TEQ6	sp|Q8TEQ6|GEMI5_HUMAN Gem-associated protein 5 OS=Homo sapiens OX=9606 GN=GEMIN5 PE=1 SV=3	23	1.27293e-05	1.65335e-05	0.296504	1	0.76991	-0.377239
GEMIN6	Q8WXD5	sp|Q8WXD5|GEMI6_HUMAN Gem-associated protein 6 OS=Homo sapiens OX=9606 GN=GEMIN6 PE=1 SV=1	2	1.05415e-05	6.14472e-06	0.303751	1	1.71553	0.778658
GET4	Q7L5D6	sp|Q7L5D6|GET4_HUMAN Golgi to ER traffic protein 4 homolog OS=Homo sapiens OX=9606 GN=GET4 PE=1 SV=1	1	5.3503e-06	6.95663e-06	0.295932	1	0.769093	-0.37877
GFM1	Q96RP9	sp|Q96RP9|EFGM_HUMAN Elongation factor G, mitochondrial OS=Homo sapiens OX=9606 GN=GFM1 PE=1 SV=2	15	1.17349e-05	3.04468e-05	0.0533826	1	0.385422	-1.37549
GFPT1	Q06210	sp|Q06210|GFPT1_HUMAN Glutamine--fructose-6-phosphate aminotransferase [isomerizing] 1 OS=Homo sapiens OX=9606 GN=GFPT1 PE=1 SV=3	23	7.90611e-05	9.26321e-05	0.354259	1	0.853496	-0.228544
GFPT2	O94808	sp|O94808|GFPT2_HUMAN Glutamine--fructose-6-phosphate aminotransferase [isomerizing] 2 OS=Homo sapiens OX=9606 GN=GFPT2 PE=1 SV=3	5	2.06852e-06	2.12205e-06	0.433775	1	0.974773	-0.0368622
GGCT	O75223	sp|O75223|GGCT_HUMAN Gamma-glutamylcyclotransferase OS=Homo sapiens OX=9606 GN=GGCT PE=1 SV=1	4	3.08289e-05	1.36734e-05	0.206127	1	2.25466	1.17291
GGCX	P38435	sp|P38435|VKGC_HUMAN Vitamin K-dependent gamma-carboxylase OS=Homo sapiens OX=9606 GN=GGCX PE=1 SV=2	5	5.23096e-06	6.034e-06	0.363344	1	0.866914	-0.20604
GGH	Q92820	sp|Q92820|GGH_HUMAN Gamma-glutamyl hydrolase OS=Homo sapiens OX=9606 GN=GGH PE=1 SV=2	4	7.50832e-06	3.63516e-06	0.235239	1	2.06547	1.04647
GGT5	P36269	sp|P36269|GGT5_HUMAN Glutathione hydrolase 5 proenzyme OS=Homo sapiens OX=9606 GN=GGT5 PE=1 SV=2	2	3.31659e-08	6.15394e-08	0.137773	1	0.538937	-0.891812
GHDC	Q8N2G8	sp|Q8N2G8|GHDC_HUMAN GH3 domain-containing protein OS=Homo sapiens OX=9606 GN=GHDC PE=1 SV=2	2	3.31659e-08	6.15394e-08	0.137773	1	0.538937	-0.891812
GHITM	Q9H3K2	sp|Q9H3K2|GHITM_HUMAN Growth hormone-inducible transmembrane protein OS=Homo sapiens OX=9606 GN=GHITM PE=1 SV=2	4	1.60111e-05	1.82681e-05	0.369764	1	0.876453	-0.190252
GID8	Q9NWU2	sp|Q9NWU2|GID8_HUMAN Glucose-induced degradation protein 8 homolog OS=Homo sapiens OX=9606 GN=GID8 PE=1 SV=1	3	2.17791e-05	1.61091e-05	0.402568	1	1.35197	0.435065
GIGYF2	Q6Y7W6	sp|Q6Y7W6|GGYF2_HUMAN GRB10-interacting GYF protein 2 OS=Homo sapiens OX=9606 GN=GIGYF2 PE=1 SV=1	4	3.94808e-06	5.92329e-07	0.0209347	2	6.66536	2.73668
GIPC1	O14908	sp|O14908|GIPC1_HUMAN PDZ domain-containing protein GIPC1 OS=Homo sapiens OX=9606 GN=GIPC1 PE=1 SV=2	8	4.53482e-05	5.86793e-05	0.298537	1	0.772815	-0.371805
GIPC2	Q8TF65	sp|Q8TF65|GIPC2_HUMAN PDZ domain-containing protein GIPC2 OS=Homo sapiens OX=9606 GN=GIPC2 PE=1 SV=1	1	1.46188e-05	2.38039e-05	0.187593	1	0.614137	-0.703367
GIT1	Q9Y2X7	sp|Q9Y2X7|GIT1_HUMAN ARF GTPase-activating protein GIT1 OS=Homo sapiens OX=9606 GN=GIT1 PE=1 SV=2	2	3.31659e-08	6.15394e-08	0.137773	1	0.538937	-0.891812
GLB1	P16278	sp|P16278|BGAL_HUMAN Beta-galactosidase OS=Homo sapiens OX=9606 GN=GLB1 PE=1 SV=2	12	5.98676e-05	3.17385e-05	0.267634	1	1.88628	0.915543
GLCE	O94923	sp|O94923|GLCE_HUMAN D-glucuronyl C5-epimerase OS=Homo sapiens OX=9606 GN=GLCE PE=1 SV=3	1	1.45194e-06	6.15394e-08	0.000278646	4	23.5936	4.56033
GLE1	Q53GS7	sp|Q53GS7|GLE1_HUMAN Nucleoporin GLE1 OS=Homo sapiens OX=9606 GN=GLE1 PE=1 SV=2	1	1.2431e-06	6.15394e-08	0.000523588	4	20.2	4.33629
GLG1	Q92896	sp|Q92896|GSLG1_HUMAN Golgi apparatus protein 1 OS=Homo sapiens OX=9606 GN=GLG1 PE=1 SV=2	10	4.4851e-06	1.82865e-06	0.180284	1	2.45268	1.29436
GLIPR1	P48060	sp|P48060|GLIP1_HUMAN Glioma pathogenesis-related protein 1 OS=Homo sapiens OX=9606 GN=GLIPR1 PE=1 SV=3	1	4.03759e-06	6.15394e-08	2.1338e-06	4	65.6097	6.03584
GLIPR2	Q9H4G4	sp|Q9H4G4|GAPR1_HUMAN Golgi-associated plant pathogenesis-related protein 1 OS=Homo sapiens OX=9606 GN=GLIPR2 PE=1 SV=3	3	8.11495e-06	1.34335e-05	0.180745	1	0.604083	-0.727181
GLO1	Q04760	sp|Q04760|LGUL_HUMAN Lactoylglutathione lyase OS=Homo sapiens OX=9606 GN=GLO1 PE=1 SV=4	9	0.000409725	0.000376433	0.498527	1	1.08844	0.122263
GLOD4	Q9HC38	sp|Q9HC38|GLOD4_HUMAN Glyoxalase domain-containing protein 4 OS=Homo sapiens OX=9606 GN=GLOD4 PE=1 SV=1	7	3.93814e-05	2.93396e-05	0.405699	1	1.34226	0.424662
GLRX	P35754	sp|P35754|GLRX1_HUMAN Glutaredoxin-1 OS=Homo sapiens OX=9606 GN=GLRX PE=1 SV=2	1	3.31659e-08	6.15394e-08	0.137773	1	0.538937	-0.891812
GLRX3	O76003	sp|O76003|GLRX3_HUMAN Glutaredoxin-3 OS=Homo sapiens OX=9606 GN=GLRX3 PE=1 SV=2	7	7.12047e-05	6.01555e-05	0.461083	1	1.18368	0.243276
GLRX5	Q86SX6	sp|Q86SX6|GLRX5_HUMAN Glutaredoxin-related protein 5, mitochondrial OS=Homo sapiens OX=9606 GN=GLRX5 PE=1 SV=2	2	3.31659e-08	4.11493e-05	1.46482e-29	4	0.000805989	-10.277
GLS	O94925	sp|O94925|GLSK_HUMAN Glutaminase kidney isoform, mitochondrial OS=Homo sapiens OX=9606 GN=GLS PE=1 SV=1	12	7.22986e-05	9.96441e-05	0.265352	1	0.725569	-0.462816
GLTP	Q9NZD2	sp|Q9NZD2|GLTP_HUMAN Glycolipid transfer protein OS=Homo sapiens OX=9606 GN=GLTP PE=1 SV=3	2	1.48177e-05	4.37327e-06	0.100897	1	3.38825	1.76054
GLUD1	P00367	sp|P00367|DHE3_HUMAN Glutamate dehydrogenase 1, mitochondrial OS=Homo sapiens OX=9606 GN=GLUD1 PE=1 SV=2;sp|P49448|DHE4_HUMAN Glutamate dehydrogenase 2, mitochondrial OS=Homo sapiens OX=9606 GN=GLUD2 PE=1 SV=2	26	0.000538013	0.000584948	0.398472	1	0.919763	-0.120666
GLUL	P15104	sp|P15104|GLNA_HUMAN Glutamine synthetase OS=Homo sapiens OX=9606 GN=GLUL PE=1 SV=4	2	1.80001e-05	9.42928e-06	0.263243	1	1.90895	0.932783
GLYR1	Q49A26	sp|Q49A26|GLYR1_HUMAN Putative oxidoreductase GLYR1 OS=Homo sapiens OX=9606 GN=GLYR1 PE=1 SV=4	1	3.31659e-08	6.15394e-08	0.137773	1	0.538937	-0.891812
GMDS	O60547	sp|O60547|GMDS_HUMAN GDP-mannose 4,6 dehydratase OS=Homo sapiens OX=9606 GN=GMDS PE=1 SV=1	2	5.58897e-06	6.15394e-08	3.48249e-07	4	90.8193	6.50493
GMFB	P60983	sp|P60983|GMFB_HUMAN Glia maturation factor beta OS=Homo sapiens OX=9606 GN=GMFB PE=1 SV=2	3	4.72378e-05	2.63872e-05	0.287271	1	1.79017	0.840101
GMPPA	Q96IJ6	sp|Q96IJ6|GMPPA_HUMAN Mannose-1-phosphate guanyltransferase alpha OS=Homo sapiens OX=9606 GN=GMPPA PE=1 SV=1	3	7.88622e-06	1.57216e-06	0.0430615	2	5.01616	2.32658
GMPPB	Q9Y5P6	sp|Q9Y5P6|GMPPB_HUMAN Mannose-1-phosphate guanyltransferase beta OS=Homo sapiens OX=9606 GN=GMPPB PE=1 SV=2	3	3.31659e-08	6.15394e-08	0.137773	1	0.538937	-0.891812
GMPS	P49915	sp|P49915|GUAA_HUMAN GMP synthase [glutamine-hydrolyzing] OS=Homo sapiens OX=9606 GN=GMPS PE=1 SV=1	20	5.12157e-05	2.76789e-05	0.274776	1	1.85035	0.887798
GNA11	P29992	sp|P29992|GNA11_HUMAN Guanine nucleotide-binding protein subunit alpha-11 OS=Homo sapiens OX=9606 GN=GNA11 PE=1 SV=2	8	0.000137238	0.000137656	0.447614	1	0.996961	-0.00439109
GNA13	Q14344	sp|Q14344|GNA13_HUMAN Guanine nucleotide-binding protein subunit alpha-13 OS=Homo sapiens OX=9606 GN=GNA13 PE=1 SV=2	5	1.64089e-05	2.36193e-05	0.243641	1	0.694723	-0.52549
GNAI1	P63096	sp|P63096|GNAI1_HUMAN Guanine nucleotide-binding protein G(i) subunit alpha-1 OS=Homo sapiens OX=9606 GN=GNAI1 PE=1 SV=2	3	1.25304e-05	6.15394e-08	2.21544e-09	4	203.616	7.66971
GNAI2	P04899	sp|P04899|GNAI2_HUMAN Guanine nucleotide-binding protein G(i) subunit alpha-2 OS=Homo sapiens OX=9606 GN=GNAI2 PE=1 SV=3	9	0.000607627	0.000627389	0.429821	1	0.968501	-0.0461742
GNAI3	P08754	sp|P08754|GNAI3_HUMAN Guanine nucleotide-binding protein G(i) subunit alpha OS=Homo sapiens OX=9606 GN=GNAI3 PE=1 SV=3	5	5.37019e-05	5.09292e-05	0.482322	1	1.05444	0.0764793
GNAO1	P09471	sp|P09471|GNAO_HUMAN Guanine nucleotide-binding protein G(o) subunit alpha OS=Homo sapiens OX=9606 GN=GNAO1 PE=1 SV=4	2	9.12932e-06	4.52089e-06	0.243089	1	2.01936	1.0139
GNAQ	P50148	sp|P50148|GNAQ_HUMAN Guanine nucleotide-binding protein G(q) subunit alpha OS=Homo sapiens OX=9606 GN=GNAQ PE=1 SV=4	4	4.9724e-06	1.02781e-05	0.10408	1	0.483785	-1.04756
GNAS	Q5JWF2	sp|Q5JWF2|GNAS1_HUMAN Guanine nucleotide-binding protein G(s) subunit alpha isoforms XLas OS=Homo sapiens OX=9606 GN=GNAS PE=1 SV=2;sp|P63092|GNAS2_HUMAN Guanine nucleotide-binding protein G(s) subunit alpha isoforms short OS=Homo sapiens OX=9606 GN=GNAS P	9	9.00004e-05	9.79834e-05	0.397663	1	0.918527	-0.122606
GNB1	P62873	sp|P62873|GBB1_HUMAN Guanine nucleotide-binding protein G(I)/G(S)/G(T) subunit beta-1 OS=Homo sapiens OX=9606 GN=GNB1 PE=1 SV=3	6	0.000846302	0.00067352	0.434608	1	1.25653	0.329451
GNB2	P62879	sp|P62879|GBB2_HUMAN Guanine nucleotide-binding protein G(I)/G(S)/G(T) subunit beta-2 OS=Homo sapiens OX=9606 GN=GNB2 PE=1 SV=3	2	0.000207846	7.67629e-05	0.152651	1	2.70764	1.43704
GNB4	Q9HAV0	sp|Q9HAV0|GBB4_HUMAN Guanine nucleotide-binding protein subunit beta-4 OS=Homo sapiens OX=9606 GN=GNB4 PE=1 SV=3	5	4.02764e-05	1.31567e-05	0.122472	1	3.06128	1.61414
GNE	Q9Y223	sp|Q9Y223|GLCNE_HUMAN Bifunctional UDP-N-acetylglucosamine 2-epimerase/N-acetylmannosamine kinase OS=Homo sapiens OX=9606 GN=GNE PE=1 SV=1	6	7.36909e-06	7.86081e-06	0.409969	1	0.937447	-0.0931917
GNG10	P50151	sp|P50151|GBG10_HUMAN Guanine nucleotide-binding protein G(I)/G(S)/G(O) subunit gamma-10 OS=Homo sapiens OX=9606 GN=GNG10 PE=1 SV=1	1	3.33151e-05	3.46909e-05	0.424647	1	0.96034	-0.0583834
GNG12	Q9UBI6	sp|Q9UBI6|GBG12_HUMAN Guanine nucleotide-binding protein G(I)/G(S)/G(O) subunit gamma-12 OS=Homo sapiens OX=9606 GN=GNG12 PE=1 SV=3	4	0.00119337	0.00121049	0.440721	1	0.98586	-0.0205451
GNG5	P63218	sp|P63218|GBG5_HUMAN Guanine nucleotide-binding protein G(I)/G(S)/G(O) subunit gamma-5 OS=Homo sapiens OX=9606 GN=GNG5 PE=1 SV=3	3	0.00018199	6.15394e-08	3.78001e-19	4	2957.28	11.5301
GNL1	P36915	sp|P36915|GNL1_HUMAN Guanine nucleotide-binding protein-like 1 OS=Homo sapiens OX=9606 GN=GNL1 PE=1 SV=2	2	5.44975e-07	6.15394e-08	0.00930426	3	8.85569	3.14661
GNL2	Q13823	sp|Q13823|NOG2_HUMAN Nucleolar GTP-binding protein 2 OS=Homo sapiens OX=9606 GN=GNL2 PE=1 SV=1	10	1.44199e-05	1.21418e-05	0.459601	1	1.18763	0.248082
GNL3	Q9BVP2	sp|Q9BVP2|GNL3_HUMAN Guanine nucleotide-binding protein-like 3 OS=Homo sapiens OX=9606 GN=GNL3 PE=1 SV=2	14	5.99671e-05	6.25543e-05	0.423565	1	0.95864	-0.0609391
GNL3L	Q9NVN8	sp|Q9NVN8|GNL3L_HUMAN Guanine nucleotide-binding protein-like 3-like protein OS=Homo sapiens OX=9606 GN=GNL3L PE=1 SV=1	3	3.51051e-06	6.15394e-08	4.47462e-06	4	57.0449	5.83403
GNPAT	O15228	sp|O15228|GNPAT_HUMAN Dihydroxyacetone phosphate acyltransferase OS=Homo sapiens OX=9606 GN=GNPAT PE=1 SV=1	9	4.0177e-06	2.8417e-06	0.383289	1	1.41383	0.499613
GNPDA1	P46926	sp|P46926|GNPI1_HUMAN Glucosamine-6-phosphate isomerase 1 OS=Homo sapiens OX=9606 GN=GNPDA1 PE=1 SV=1	9	5.71825e-05	1.49651e-05	0.079093	1	3.82107	1.93398
GNPNAT1	Q96EK6	sp|Q96EK6|GNA1_HUMAN Glucosamine 6-phosphate N-acetyltransferase OS=Homo sapiens OX=9606 GN=GNPNAT1 PE=1 SV=1	3	2.73482e-05	1.99288e-05	0.396111	1	1.37229	0.456588
GNS	P15586	sp|P15586|GNS_HUMAN N-acetylglucosamine-6-sulfatase OS=Homo sapiens OX=9606 GN=GNS PE=1 SV=3	6	2.79449e-05	2.60182e-05	0.493774	1	1.07405	0.103063
GOLGA2	Q08379	sp|Q08379|GOGA2_HUMAN Golgin subfamily A member 2 OS=Homo sapiens OX=9606 GN=GOLGA2 PE=1 SV=3	11	1.55139e-05	1.67181e-05	0.403825	1	0.927971	-0.107849
GOLGA3	Q08378	sp|Q08378|GOGA3_HUMAN Golgin subfamily A member 3 OS=Homo sapiens OX=9606 GN=GOLGA3 PE=1 SV=2	4	1.38233e-06	6.10781e-07	0.20492	1	2.26321	1.17837
GOLGA4	Q13439	sp|Q13439|GOGA4_HUMAN Golgin subfamily A member 4 OS=Homo sapiens OX=9606 GN=GOLGA4 PE=1 SV=1	15	2.34697e-06	1.86371e-06	0.433639	1	1.2593	0.33262
GOLGA5	Q8TBA6	sp|Q8TBA6|GOGA5_HUMAN Golgin subfamily A member 5 OS=Homo sapiens OX=9606 GN=GOLGA5 PE=1 SV=3	3	2.49614e-06	6.15394e-08	2.46519e-05	4	40.5617	5.34204
GOLGB1	Q14789	sp|Q14789|GOGB1_HUMAN Golgin subfamily B member 1 OS=Homo sapiens OX=9606 GN=GOLGB1 PE=1 SV=2	13	1.02431e-06	1.84526e-06	0.148171	1	0.555105	-0.849167
GOLIM4	O00461	sp|O00461|GOLI4_HUMAN Golgi integral membrane protein 4 OS=Homo sapiens OX=9606 GN=GOLIM4 PE=1 SV=1	8	1.01437e-05	1.20311e-05	0.347195	1	0.843122	-0.246187
GOLM1	Q8NBJ4	sp|Q8NBJ4|GOLM1_HUMAN Golgi membrane protein 1 OS=Homo sapiens OX=9606 GN=GOLM1 PE=1 SV=1	8	3.8188e-05	3.93041e-05	0.43178	1	0.971604	-0.0415589
GOLPH3	Q9H4A6	sp|Q9H4A6|GOLP3_HUMAN Golgi phosphoprotein 3 OS=Homo sapiens OX=9606 GN=GOLPH3 PE=1 SV=1	5	3.16244e-05	5.53578e-05	0.15876	1	0.571273	-0.807748
GOLT1B	Q9Y3E0	sp|Q9Y3E0|GOT1B_HUMAN Vesicle transport protein GOT1B OS=Homo sapiens OX=9606 GN=GOLT1B PE=1 SV=1	2	7.7271e-05	9.2263e-05	0.343357	1	0.837508	-0.255825
GOPC	Q9HD26	sp|Q9HD26|GOPC_HUMAN Golgi-associated PDZ and coiled-coil motif-containing protein OS=Homo sapiens OX=9606 GN=GOPC PE=1 SV=1	5	5.54919e-06	1.62752e-06	0.0996587	1	3.4096	1.7696
GORASP2	Q9H8Y8	sp|Q9H8Y8|GORS2_HUMAN Golgi reassembly-stacking protein 2 OS=Homo sapiens OX=9606 GN=GORASP2 PE=1 SV=3	4	3.86852e-05	6.15394e-08	4.99137e-13	4	628.625	9.29606
GOSR1	O95249	sp|O95249|GOSR1_HUMAN Golgi SNAP receptor complex member 1 OS=Homo sapiens OX=9606 GN=GOSR1 PE=1 SV=1	4	6.26522e-06	9.9275e-06	0.199238	1	0.631097	-0.664066
GOSR2	O14653	sp|O14653|GOSR2_HUMAN Golgi SNAP receptor complex member 2 OS=Homo sapiens OX=9606 GN=GOSR2 PE=1 SV=2	2	8.26412e-06	1.23448e-05	0.225901	1	0.669442	-0.57897
GOT1	P17174	sp|P17174|AATC_HUMAN Aspartate aminotransferase, cytoplasmic OS=Homo sapiens OX=9606 GN=GOT1 PE=1 SV=3	10	0.000121326	5.9971e-05	0.242444	1	2.02309	1.01656
GOT2	P00505	sp|P00505|AATM_HUMAN Aspartate aminotransferase, mitochondrial OS=Homo sapiens OX=9606 GN=GOT2 PE=1 SV=3	23	0.000247625	0.000330302	0.282324	1	0.749694	-0.415626
GPAA1	O43292	sp|O43292|GPAA1_HUMAN Glycosylphosphatidylinositol anchor attachment 1 protein OS=Homo sapiens OX=9606 GN=GPAA1 PE=1 SV=3	7	3.69946e-05	2.54646e-05	0.371715	1	1.45279	0.538823
GPAT3	Q53EU6	sp|Q53EU6|GPAT3_HUMAN Glycerol-3-phosphate acyltransferase 3 OS=Homo sapiens OX=9606 GN=GPAT3 PE=1 SV=2	6	2.60554e-05	2.87861e-05	0.388862	1	0.905138	-0.143791
GPAT4	Q86UL3	sp|Q86UL3|GPAT4_HUMAN Glycerol-3-phosphate acyltransferase 4 OS=Homo sapiens OX=9606 GN=GPAT4 PE=1 SV=1	3	3.31659e-08	6.15394e-08	0.137773	1	0.538937	-0.891812
GPATCH4	Q5T3I0	sp|Q5T3I0|GPTC4_HUMAN G patch domain-containing protein 4 OS=Homo sapiens OX=9606 GN=GPATCH4 PE=1 SV=2	2	3.19228e-06	1.598e-06	0.246894	1	1.99768	0.998323
GPATCH8	Q9UKJ3	sp|Q9UKJ3|GPTC8_HUMAN G patch domain-containing protein 8 OS=Homo sapiens OX=9606 GN=GPATCH8 PE=1 SV=2	2	8.43318e-07	6.15394e-08	0.0022371	3	13.7037	3.77649
GPC1	P35052	sp|P35052|GPC1_HUMAN Glypican-1 OS=Homo sapiens OX=9606 GN=GPC1 PE=1 SV=2	4	3.70941e-06	6.42151e-06	0.162987	1	0.577654	-0.791723
GPD1L	Q8N335	sp|Q8N335|GPD1L_HUMAN Glycerol-3-phosphate dehydrogenase 1-like protein OS=Homo sapiens OX=9606 GN=GPD1L PE=1 SV=1	1	2.74476e-06	6.15394e-08	1.55457e-05	4	44.6017	5.47903
GPD2	P43304	sp|P43304|GPDM_HUMAN Glycerol-3-phosphate dehydrogenase, mitochondrial OS=Homo sapiens OX=9606 GN=GPD2 PE=1 SV=3	31	0.000126299	8.89416e-05	0.381423	1	1.42002	0.505912
GPHN	Q9NQX3	sp|Q9NQX3|GEPH_HUMAN Gephyrin OS=Homo sapiens OX=9606 GN=GPHN PE=1 SV=1	1	8.3934e-07	6.15394e-08	0.00227457	3	13.6391	3.76967
GPI	P06744	sp|P06744|G6PI_HUMAN Glucose-6-phosphate isomerase OS=Homo sapiens OX=9606 GN=GPI PE=1 SV=4	12	0.000667295	0.000520364	0.42565	1	1.28236	0.358806
GPKOW	Q92917	sp|Q92917|GPKOW_HUMAN G-patch domain and KOW motifs-containing protein OS=Homo sapiens OX=9606 GN=GPKOW PE=1 SV=2	6	1.16354e-05	6.15394e-08	3.64321e-09	4	189.072	7.56279
GPN1	Q9HCN4	sp|Q9HCN4|GPN1_HUMAN GPN-loop GTPase 1 OS=Homo sapiens OX=9606 GN=GPN1 PE=1 SV=1	2	5.30057e-06	6.15394e-08	4.72025e-07	4	86.1329	6.42849
GPR107	Q5VW38	sp|Q5VW38|GP107_HUMAN Protein GPR107 OS=Homo sapiens OX=9606 GN=GPR107 PE=1 SV=1	2	2.40664e-06	6.15394e-08	2.93501e-05	4	39.1073	5.28936
GPR89B	P0CG08	sp|P0CG08|GPHRB_HUMAN Golgi pH regulator B OS=Homo sapiens OX=9606 GN=GPR89B PE=1 SV=1;sp|B7ZAQ6|GPHRA_HUMAN Golgi pH regulator A OS=Homo sapiens OX=9606 GN=GPR89A PE=1 SV=2	2	5.09173e-06	9.30011e-06	0.143249	1	0.547491	-0.869092
GPRC5A	Q8NFJ5	sp|Q8NFJ5|RAI3_HUMAN Retinoic acid-induced protein 3 OS=Homo sapiens OX=9606 GN=GPRC5A PE=1 SV=2	4	0.000250609	0.000276789	0.389044	1	0.905414	-0.143351
GPS1	Q13098	sp|Q13098|CSN1_HUMAN COP9 signalosome complex subunit 1 OS=Homo sapiens OX=9606 GN=GPS1 PE=1 SV=4	7	1.98896e-05	2.1036e-05	0.415162	1	0.945503	-0.0808456
GPX1	P07203	sp|P07203|GPX1_HUMAN Glutathione peroxidase 1 OS=Homo sapiens OX=9606 GN=GPX1 PE=1 SV=4	5	6.85196e-05	5.14828e-05	0.409388	1	1.33092	0.412427
GPX4	P36969	sp|P36969|GPX4_HUMAN Phospholipid hydroperoxide glutathione peroxidase OS=Homo sapiens OX=9606 GN=GPX4 PE=1 SV=3	3	2.24752e-05	1.43008e-05	0.338914	1	1.57161	0.652243
GPX8	Q8TED1	sp|Q8TED1|GPX8_HUMAN Probable glutathione peroxidase 8 OS=Homo sapiens OX=9606 GN=GPX8 PE=1 SV=2	2	4.23648e-06	4.90839e-06	0.360775	1	0.863109	-0.212385
GRAMD2B	Q96HH9	sp|Q96HH9|GRM2B_HUMAN GRAM domain-containing protein 2B OS=Homo sapiens OX=9606 GN=GRAMD2B PE=1 SV=1	2	1.74034e-06	1.97443e-06	0.373106	1	0.881439	-0.182068
GRB2	P62993	sp|P62993|GRB2_HUMAN Growth factor receptor-bound protein 2 OS=Homo sapiens OX=9606 GN=GRB2 PE=1 SV=1	9	4.61438e-05	4.74232e-05	0.432674	1	0.973022	-0.0394554
GREB1L	Q9C091	sp|Q9C091|GRB1L_HUMAN GREB1-like protein OS=Homo sapiens OX=9606 GN=GREB1L PE=1 SV=2	1	3.31659e-08	6.15394e-08	0.137773	1	0.538937	-0.891812
GRHPR	Q9UBQ7	sp|Q9UBQ7|GRHPR_HUMAN Glyoxylate reductase/hydroxypyruvate reductase OS=Homo sapiens OX=9606 GN=GRHPR PE=1 SV=1	9	0.000110387	0.000115513	0.421642	1	0.955623	-0.0654867
GRIPAP1	Q4V328	sp|Q4V328|GRAP1_HUMAN GRIP1-associated protein 1 OS=Homo sapiens OX=9606 GN=GRIPAP1 PE=1 SV=2	2	5.74809e-07	3.8935e-06	0.000940164	4	0.147633	-2.75991
GRN	P28799	sp|P28799|GRN_HUMAN Progranulin OS=Homo sapiens OX=9606 GN=GRN PE=1 SV=2	4	7.22986e-06	6.15394e-08	7.56937e-08	4	117.483	6.87631
GRPEL1	Q9HAV7	sp|Q9HAV7|GRPE1_HUMAN GrpE protein homolog 1, mitochondrial OS=Homo sapiens OX=9606 GN=GRPEL1 PE=1 SV=2	9	0.000242653	0.000241729	0.451844	1	1.00382	0.00550252
GRSF1	Q12849	sp|Q12849|GRSF1_HUMAN G-rich sequence factor 1 OS=Homo sapiens OX=9606 GN=GRSF1 PE=1 SV=3	10	6.06632e-05	6.43996e-05	0.412896	1	0.941981	-0.0862296
GRWD1	Q9BQ67	sp|Q9BQ67|GRWD1_HUMAN Glutamate-rich WD repeat-containing protein 1 OS=Homo sapiens OX=9606 GN=GRWD1 PE=1 SV=1	7	1.84973e-05	2.97087e-05	0.193405	1	0.622623	-0.68357
GSDMD	P57764	sp|P57764|GSDMD_HUMAN Gasdermin-D OS=Homo sapiens OX=9606 GN=GSDMD PE=1 SV=1	1	3.31162e-06	3.1554e-06	0.47941	1	1.04951	0.069714
GSDME	O60443	sp|O60443|GSDME_HUMAN Gasdermin-E OS=Homo sapiens OX=9606 GN=GSDME PE=1 SV=2	10	3.76908e-05	3.46909e-05	0.499336	1	1.08647	0.119653
GSK3A	P49840	sp|P49840|GSK3A_HUMAN Glycogen synthase kinase-3 alpha OS=Homo sapiens OX=9606 GN=GSK3A PE=1 SV=2	5	1.61106e-05	7.14116e-06	0.205936	1	2.25601	1.17378
GSK3B	P49841	sp|P49841|GSK3B_HUMAN Glycogen synthase kinase-3 beta OS=Homo sapiens OX=9606 GN=GSK3B PE=1 SV=2	2	5.80776e-06	6.15394e-08	2.78765e-07	4	94.3746	6.56033
GSN	P06396	sp|P06396|GELS_HUMAN Gelsolin OS=Homo sapiens OX=9606 GN=GSN PE=1 SV=1	9	0.000218785	0.000157954	0.392099	1	1.38512	0.470009
GSPT1	P15170	sp|P15170|ERF3A_HUMAN Eukaryotic peptide chain release factor GTP-binding subunit ERF3A OS=Homo sapiens OX=9606 GN=GSPT1 PE=1 SV=1	5	2.61548e-05	2.4542e-05	0.488931	1	1.06572	0.0918247
GSPT2	Q8IYD1	sp|Q8IYD1|ERF3B_HUMAN Eukaryotic peptide chain release factor GTP-binding subunit ERF3B OS=Homo sapiens OX=9606 GN=GSPT2 PE=1 SV=2	1	8.99009e-06	5.38816e-06	0.314734	1	1.66849	0.738543
GSR	P00390	sp|P00390|GSHR_HUMAN Glutathione reductase, mitochondrial OS=Homo sapiens OX=9606 GN=GSR PE=1 SV=2	8	4.45527e-05	3.41373e-05	0.417943	1	1.3051	0.384162
GSS	P48637	sp|P48637|GSHB_HUMAN Glutathione synthetase OS=Homo sapiens OX=9606 GN=GSS PE=1 SV=1	11	6.11605e-05	1.67365e-05	0.0867275	1	3.65431	1.8696
GSTK1	Q9Y2Q3	sp|Q9Y2Q3|GSTK1_HUMAN Glutathione S-transferase kappa 1 OS=Homo sapiens OX=9606 GN=GSTK1 PE=1 SV=3	11	0.000204863	0.000230658	0.377602	1	0.888168	-0.171096
GSTM1	P09488	sp|P09488|GSTM1_HUMAN Glutathione S-transferase Mu 1 OS=Homo sapiens OX=9606 GN=GSTM1 PE=1 SV=3;sp|Q03013|GSTM4_HUMAN Glutathione S-transferase Mu 4 OS=Homo sapiens OX=9606 GN=GSTM4 PE=1 SV=3	1	1.82984e-05	1.80097e-05	0.459313	1	1.01603	0.0229409
GSTM3	P21266	sp|P21266|GSTM3_HUMAN Glutathione S-transferase Mu 3 OS=Homo sapiens OX=9606 GN=GSTM3 PE=1 SV=3	10	0.000165084	0.000116067	0.380734	1	1.42231	0.508239
GSTO1	P78417	sp|P78417|GSTO1_HUMAN Glutathione S-transferase omega-1 OS=Homo sapiens OX=9606 GN=GSTO1 PE=1 SV=2	12	0.000476355	0.000262027	0.281416	1	1.81796	0.862323
GSTP1	P09211	sp|P09211|GSTP1_HUMAN Glutathione S-transferase P OS=Homo sapiens OX=9606 GN=GSTP1 PE=1 SV=2	13	0.00147183	0.00119757	0.444398	1	1.22901	0.297495
GSTZ1	O43708	sp|O43708|MAAI_HUMAN Maleylacetoacetate isomerase OS=Homo sapiens OX=9606 GN=GSTZ1 PE=1 SV=3	1	3.31659e-08	1.39317e-05	7.05487e-22	4	0.0023806	-8.71446
GTF2A1	P52655	sp|P52655|TF2AA_HUMAN Transcription initiation factor IIA subunit 1 OS=Homo sapiens OX=9606 GN=GTF2A1 PE=1 SV=1	1	3.31659e-08	1.78806e-05	1.53818e-23	4	0.00185485	-9.07448
GTF2F1	P35269	sp|P35269|T2FA_HUMAN General transcription factor IIF subunit 1 OS=Homo sapiens OX=9606 GN=GTF2F1 PE=1 SV=2	7	4.05747e-05	3.72743e-05	0.498484	1	1.08855	0.122402
GTF2F2	P13984	sp|P13984|T2FB_HUMAN General transcription factor IIF subunit 2 OS=Homo sapiens OX=9606 GN=GTF2F2 PE=1 SV=2	3	1.40222e-05	9.02333e-06	0.34355	1	1.55399	0.635977
GTF2H2C	Q6P1K8	sp|Q6P1K8|T2H2L_HUMAN General transcription factor IIH subunit 2-like protein OS=Homo sapiens OX=9606 GN=GTF2H2C PE=1 SV=1;sp|Q13888|TF2H2_HUMAN General transcription factor IIH subunit 2 OS=Homo sapiens OX=9606 GN=GTF2H2 PE=1 SV=1	5	1.79006e-06	5.90483e-06	0.0234546	2	0.303152	-1.72189
GTF2H3	Q13889	sp|Q13889|TF2H3_HUMAN General transcription factor IIH subunit 3 OS=Homo sapiens OX=9606 GN=GTF2H3 PE=1 SV=2	1	3.31659e-08	6.15394e-08	0.137773	1	0.538937	-0.891812
GTF2H4	Q92759	sp|Q92759|TF2H4_HUMAN General transcription factor IIH subunit 4 OS=Homo sapiens OX=9606 GN=GTF2H4 PE=1 SV=1	2	4.95251e-06	6.15394e-08	6.93622e-07	4	80.4769	6.3305
GTF2I	P78347	sp|P78347|GTF2I_HUMAN General transcription factor II-I OS=Homo sapiens OX=9606 GN=GTF2I PE=1 SV=2	24	6.47406e-05	8.96797e-05	0.262775	1	0.721909	-0.470111
GTF3C1	Q12789	sp|Q12789|TF3C1_HUMAN General transcription factor 3C polypeptide 1 OS=Homo sapiens OX=9606 GN=GTF3C1 PE=1 SV=4	2	3.31659e-08	1.62937e-07	0.00455468	3	0.203551	-2.29654
GTF3C4	Q9UKN8	sp|Q9UKN8|TF3C4_HUMAN General transcription factor 3C polypeptide 4 OS=Homo sapiens OX=9606 GN=GTF3C4 PE=1 SV=2	1	2.91382e-06	6.15394e-08	1.15649e-05	4	47.3489	5.56526
GTPBP1	O00178	sp|O00178|GTPB1_HUMAN GTP-binding protein 1 OS=Homo sapiens OX=9606 GN=GTPBP1 PE=1 SV=3	4	3.31659e-08	2.71253e-06	1.36446e-12	4	0.0122269	-6.3538
GTPBP10	A4D1E9	sp|A4D1E9|GTPBA_HUMAN GTP-binding protein 10 OS=Homo sapiens OX=9606 GN=GTPBP10 PE=1 SV=1	6	2.20774e-06	5.16673e-06	0.0732311	1	0.4273	-1.22668
GTPBP4	Q9BZE4	sp|Q9BZE4|NOG1_HUMAN Nucleolar GTP-binding protein 1 OS=Homo sapiens OX=9606 GN=GTPBP4 PE=1 SV=3	26	0.00012431	0.000104995	0.460978	1	1.18396	0.243616
GTPBP6	O43824	sp|O43824|GTPB6_HUMAN Putative GTP-binding protein 6 OS=Homo sapiens OX=9606 GN=GTPBP6 PE=2 SV=4	3	3.31659e-08	2.60182e-06	2.16343e-12	4	0.0127472	-6.29368
GUSB	P08236	sp|P08236|BGLR_HUMAN Beta-glucuronidase OS=Homo sapiens OX=9606 GN=GUSB PE=1 SV=2	3	8.12489e-06	2.19586e-06	0.0845439	1	3.7001	1.88756
GXYLT1	Q4G148	sp|Q4G148|GXLT1_HUMAN Glucoside xylosyltransferase 1 OS=Homo sapiens OX=9606 GN=GXYLT1 PE=1 SV=2	3	4.14698e-06	6.15394e-08	1.84725e-06	4	67.3873	6.0744
GYG1	P46976	sp|P46976|GLYG_HUMAN Glycogenin-1 OS=Homo sapiens OX=9606 GN=GYG1 PE=1 SV=4	3	3.8188e-06	3.8935e-06	0.437567	1	0.980814	-0.0279485
GYS1	P13807	sp|P13807|GYS1_HUMAN Glycogen [starch] synthase, muscle OS=Homo sapiens OX=9606 GN=GYS1 PE=1 SV=2	5	9.59672e-06	6.16317e-06	0.342724	1	1.55711	0.638869
H1F0	P07305	sp|P07305|H10_HUMAN Histone H1.0 OS=Homo sapiens OX=9606 GN=H1F0 PE=1 SV=3	4	0.000529063	0.00038566	0.396253	1	1.37184	0.456111
H1FX	Q92522	sp|Q92522|H1X_HUMAN Histone H1x OS=Homo sapiens OX=9606 GN=H1FX PE=1 SV=1	7	0.000170056	0.000135627	0.43555	1	1.25385	0.326368
H2AFV	Q71UI9	sp|Q71UI9|H2AV_HUMAN Histone H2A.V OS=Homo sapiens OX=9606 GN=H2AFV PE=1 SV=3;sp|P0C0S5|H2AZ_HUMAN Histone H2A.Z OS=Homo sapiens OX=9606 GN=H2AFZ PE=1 SV=2	2	0.00051514	0.000863582	0.175623	1	0.596516	-0.745368
H2AFX	P16104	sp|P16104|H2AX_HUMAN Histone H2AX OS=Homo sapiens OX=9606 GN=H2AFX PE=1 SV=2	2	0.00227736	0.00243574	0.40837	1	0.934974	-0.0970022
H2AFY	O75367	sp|O75367|H2AY_HUMAN Core histone macro-H2A.1 OS=Homo sapiens OX=9606 GN=H2AFY PE=1 SV=4	14	0.000987518	0.000987215	0.44968	1	1.00031	0.000443005
H3F3A	P84243	sp|P84243|H33_HUMAN Histone H3.3 OS=Homo sapiens OX=9606 GN=H3F3A PE=1 SV=2	1	0.00362985	0.00380124	0.421189	1	0.954912	-0.0665597
H6PD	O95479	sp|O95479|G6PE_HUMAN GDH/6PGL endoplasmic bifunctional protein OS=Homo sapiens OX=9606 GN=H6PD PE=1 SV=2	11	6.33483e-06	1.05364e-05	0.178811	1	0.601231	-0.734009
HABP2	Q14520	sp|Q14520|HABP2_HUMAN Hyaluronan-binding protein 2 OS=Homo sapiens OX=9606 GN=HABP2 PE=1 SV=1	2	3.31659e-08	6.15394e-08	0.137773	1	0.538937	-0.891812
HACD2	Q6Y1H2	sp|Q6Y1H2|HACD2_HUMAN Very-long-chain (3R)-3-hydroxyacyl-CoA dehydratase 2 OS=Homo sapiens OX=9606 GN=HACD2 PE=1 SV=1	2	1.65084e-05	6.15394e-08	3.2818e-10	4	268.256	8.06747
HACD3	Q9P035	sp|Q9P035|HACD3_HUMAN Very-long-chain (3R)-3-hydroxyacyl-CoA dehydratase 3 OS=Homo sapiens OX=9606 GN=HACD3 PE=1 SV=2	8	0.00021083	0.000413338	0.119758	1	0.510065	-0.971246
HADH	Q16836	sp|Q16836|HCDH_HUMAN Hydroxyacyl-coenzyme A dehydrogenase, mitochondrial OS=Homo sapiens OX=9606 GN=HADH PE=1 SV=3	11	0.000389836	0.00049453	0.309348	1	0.788296	-0.343191
HADHA	P40939	sp|P40939|ECHA_HUMAN Trifunctional enzyme subunit alpha, mitochondrial OS=Homo sapiens OX=9606 GN=HADHA PE=1 SV=2	34	0.00047735	0.000690128	0.241504	1	0.691684	-0.531816
HADHB	P55084	sp|P55084|ECHB_HUMAN Trifunctional enzyme subunit beta, mitochondrial OS=Homo sapiens OX=9606 GN=HADHB PE=1 SV=3	22	0.000393814	0.000429946	0.395983	1	0.915961	-0.126641
HAGH	Q16775	sp|Q16775|GLO2_HUMAN Hydroxyacylglutathione hydrolase, mitochondrial OS=Homo sapiens OX=9606 GN=HAGH PE=1 SV=2	1	6.3945e-06	6.15394e-08	1.58333e-07	4	103.909	6.69918
HARS	P12081	sp|P12081|SYHC_HUMAN Histidine--tRNA ligase, cytoplasmic OS=Homo sapiens OX=9606 GN=HARS PE=1 SV=2	9	8.34368e-05	5.01911e-05	0.316195	1	1.66238	0.733252
HARS2	P49590	sp|P49590|SYHM_HUMAN Probable histidine--tRNA ligase, mitochondrial OS=Homo sapiens OX=9606 GN=HARS2 PE=1 SV=1	2	1.31271e-06	1.64044e-06	0.317643	1	0.800221	-0.321529
HAT1	O14929	sp|O14929|HAT1_HUMAN Histone acetyltransferase type B catalytic subunit OS=Homo sapiens OX=9606 GN=HAT1 PE=1 SV=1	5	3.57018e-05	3.52445e-05	0.457452	1	1.01298	0.0185994
HAUS5	O94927	sp|O94927|HAUS5_HUMAN HAUS augmin-like complex subunit 5 OS=Homo sapiens OX=9606 GN=HAUS5 PE=1 SV=2	1	3.31659e-08	8.02688e-07	1.76027e-07	4	0.0413185	-4.59707
HAX1	O00165	sp|O00165|HAX1_HUMAN HCLS1-associated protein X-1 OS=Homo sapiens OX=9606 GN=HAX1 PE=1 SV=2	3	3.31659e-08	6.15394e-08	0.137773	1	0.538937	-0.891812
HBS1L	Q9Y450	sp|Q9Y450|HBS1L_HUMAN HBS1-like protein OS=Homo sapiens OX=9606 GN=HBS1L PE=1 SV=1	9	5.26079e-06	7.89772e-06	0.223574	1	0.666116	-0.586155
HCCS	P53701	sp|P53701|CCHL_HUMAN Cytochrome c-type heme lyase OS=Homo sapiens OX=9606 GN=HCCS PE=1 SV=1	10	0.000101437	5.24054e-05	0.258193	1	1.93562	0.952794
HCFC1	P51610	sp|P51610|HCFC1_HUMAN Host cell factor 1 OS=Homo sapiens OX=9606 GN=HCFC1 PE=1 SV=2	13	1.26299e-05	7.86081e-06	0.329906	1	1.60669	0.684091
HDAC1	Q13547	sp|Q13547|HDAC1_HUMAN Histone deacetylase 1 OS=Homo sapiens OX=9606 GN=HDAC1 PE=1 SV=1	10	6.43428e-05	8.52511e-05	0.285871	1	0.754745	-0.405939
HDAC2	Q92769	sp|Q92769|HDAC2_HUMAN Histone deacetylase 2 OS=Homo sapiens OX=9606 GN=HDAC2 PE=1 SV=2	9	6.09616e-05	5.70186e-05	0.490932	1	1.06915	0.0964684
HDAC6	Q9UBN7	sp|Q9UBN7|HDAC6_HUMAN Histone deacetylase 6 OS=Homo sapiens OX=9606 GN=HDAC6 PE=1 SV=2	2	3.31659e-08	6.15394e-08	0.137773	1	0.538937	-0.891812
HDGF	P51858	sp|P51858|HDGF_HUMAN Hepatoma-derived growth factor OS=Homo sapiens OX=9606 GN=HDGF PE=1 SV=1	14	0.000333151	0.000238039	0.387637	1	1.39956	0.484978
HDGFL2	Q7Z4V5	sp|Q7Z4V5|HDGR2_HUMAN Hepatoma-derived growth factor-related protein 2 OS=Homo sapiens OX=9606 GN=HDGFL2 PE=1 SV=1	6	1.30277e-05	1.86371e-05	0.246661	1	0.699017	-0.5166
HDHD5	Q9BXW7	sp|Q9BXW7|HDHD5_HUMAN Haloacid dehalogenase-like hydrolase domain-containing 5 OS=Homo sapiens OX=9606 GN=HDHD5 PE=1 SV=1	9	4.36576e-05	5.96019e-05	0.270222	1	0.732487	-0.449125
HDLBP	Q00341	sp|Q00341|VIGLN_HUMAN Vigilin OS=Homo sapiens OX=9606 GN=HDLBP PE=1 SV=2	35	9.2586e-05	8.00843e-05	0.471583	1	1.15611	0.209274
HEATR1	Q9H583	sp|Q9H583|HEAT1_HUMAN HEAT repeat-containing protein 1 OS=Homo sapiens OX=9606 GN=HEATR1 PE=1 SV=3	34	1.02431e-05	2.04824e-05	0.113723	1	0.500095	-0.999727
HEATR3	Q7Z4Q2	sp|Q7Z4Q2|HEAT3_HUMAN HEAT repeat-containing protein 3 OS=Homo sapiens OX=9606 GN=HEATR3 PE=1 SV=2	1	1.06409e-06	6.15394e-08	0.00095699	4	17.2912	4.11197
HEBP1	Q9NRV9	sp|Q9NRV9|HEBP1_HUMAN Heme-binding protein 1 OS=Homo sapiens OX=9606 GN=HEBP1 PE=1 SV=1	6	3.1525e-05	3.56135e-05	0.375619	1	0.885197	-0.17593
HECTD1	Q9ULT8	sp|Q9ULT8|HECD1_HUMAN E3 ubiquitin-protein ligase HECTD1 OS=Homo sapiens OX=9606 GN=HECTD1 PE=1 SV=3	7	2.23758e-06	1.29537e-06	0.301064	1	1.72736	0.78857
HEG1	Q9ULI3	sp|Q9ULI3|HEG1_HUMAN Protein HEG homolog 1 OS=Homo sapiens OX=9606 GN=HEG1 PE=1 SV=3	2	3.31659e-08	1.01305e-06	2.43535e-08	4	0.0327387	-4.93286
HELLS	Q9NRZ9	sp|Q9NRZ9|HELLS_HUMAN Lymphoid-specific helicase OS=Homo sapiens OX=9606 GN=HELLS PE=1 SV=1	4	1.57128e-06	9.76143e-07	0.329152	1	1.60968	0.686773
HELZ2	Q9BYK8	sp|Q9BYK8|HELZ2_HUMAN Helicase with zinc finger domain 2 OS=Homo sapiens OX=9606 GN=HELZ2 PE=1 SV=6	2	3.31659e-08	6.15394e-08	0.137773	1	0.538937	-0.891812
HERC4	Q5GLZ8	sp|Q5GLZ8|HERC4_HUMAN Probable E3 ubiquitin-protein ligase HERC4 OS=Homo sapiens OX=9606 GN=HERC4 PE=1 SV=1	7	4.40554e-06	5.53578e-06	0.314592	1	0.79583	-0.329468
HERC6	Q8IVU3	sp|Q8IVU3|HERC6_HUMAN Probable E3 ubiquitin-protein ligase HERC6 OS=Homo sapiens OX=9606 GN=HERC6 PE=1 SV=2	1	9.1691e-06	9.94596e-06	0.399863	1	0.921892	-0.11733
HEXA	P06865	sp|P06865|HEXA_HUMAN Beta-hexosaminidase subunit alpha OS=Homo sapiens OX=9606 GN=HEXA PE=1 SV=2	3	8.24423e-06	1.26216e-05	0.214551	1	0.653185	-0.614436
HEXB	P07686	sp|P07686|HEXB_HUMAN Beta-hexosaminidase subunit beta OS=Homo sapiens OX=9606 GN=HEXB PE=1 SV=3	11	6.26522e-05	9.72452e-05	0.208353	1	0.64427	-0.634263
HEXIM1	O94992	sp|O94992|HEXI1_HUMAN Protein HEXIM1 OS=Homo sapiens OX=9606 GN=HEXIM1 PE=1 SV=1	3	1.44199e-05	6.95663e-06	0.234014	1	2.07283	1.0516
HFE	Q30201	sp|Q30201|HFE_HUMAN Hereditary hemochromatosis protein OS=Homo sapiens OX=9606 GN=HFE PE=1 SV=1	2	3.31659e-08	3.5429e-06	6.44706e-14	4	0.00936122	-6.73909
HFM1	A2PYH4	sp|A2PYH4|HFM1_HUMAN Probable ATP-dependent DNA helicase HFM1 OS=Homo sapiens OX=9606 GN=HFM1 PE=1 SV=2	1	1.91934e-06	4.29946e-06	0.0831895	1	0.446416	-1.16354
HGH1	Q9BTY7	sp|Q9BTY7|HGH1_HUMAN Protein HGH1 homolog OS=Homo sapiens OX=9606 GN=HGH1 PE=1 SV=1	3	7.23981e-06	7.47331e-06	0.429982	1	0.968756	-0.0457953
HGS	O14964	sp|O14964|HGS_HUMAN Hepatocyte growth factor-regulated tyrosine kinase substrate OS=Homo sapiens OX=9606 GN=HGS PE=1 SV=1	7	3.02322e-05	1.27138e-05	0.189544	1	2.37789	1.24968
HIBADH	P31937	sp|P31937|3HIDH_HUMAN 3-hydroxyisobutyrate dehydrogenase, mitochondrial OS=Homo sapiens OX=9606 GN=HIBADH PE=1 SV=2	10	0.000183979	0.000221431	0.338801	1	0.830861	-0.267321
HIBCH	Q6NVY1	sp|Q6NVY1|HIBCH_HUMAN 3-hydroxyisobutyryl-CoA hydrolase, mitochondrial OS=Homo sapiens OX=9606 GN=HIBCH PE=1 SV=2	6	6.40445e-06	6.77211e-06	0.415294	1	0.945709	-0.0805312
HIGD1A	Q9Y241	sp|Q9Y241|HIG1A_HUMAN HIG1 domain family member 1A, mitochondrial OS=Homo sapiens OX=9606 GN=HIGD1A PE=1 SV=1	2	3.29173e-05	9.42928e-05	0.0385985	2	0.349096	-1.5183
HIGD2A	Q9BW72	sp|Q9BW72|HIG2A_HUMAN HIG1 domain family member 2A, mitochondrial OS=Homo sapiens OX=9606 GN=HIGD2A PE=1 SV=1	1	3.31659e-08	1.54817e-05	1.42578e-22	4	0.00214226	-8.86665
HINT1	P49773	sp|P49773|HINT1_HUMAN Histidine triad nucleotide-binding protein 1 OS=Homo sapiens OX=9606 GN=HINT1 PE=1 SV=2	6	0.000540002	0.000400422	0.403657	1	1.34858	0.431445
HINT2	Q9BX68	sp|Q9BX68|HINT2_HUMAN Histidine triad nucleotide-binding protein 2, mitochondrial OS=Homo sapiens OX=9606 GN=HINT2 PE=1 SV=1	5	4.1967e-05	3.93041e-05	0.490118	1	1.06775	0.0945777
HIP1	O00291	sp|O00291|HIP1_HUMAN Huntingtin-interacting protein 1 OS=Homo sapiens OX=9606 GN=HIP1 PE=1 SV=5	4	2.32708e-06	9.52155e-07	0.181327	1	2.44402	1.28925
HIP1R	O75146	sp|O75146|HIP1R_HUMAN Huntingtin-interacting protein 1-related protein OS=Homo sapiens OX=9606 GN=HIP1R PE=1 SV=2	8	2.71493e-06	2.25122e-06	0.452784	1	1.20598	0.270208
HIST1H1C	P16403	sp|P16403|H12_HUMAN Histone H1.2 OS=Homo sapiens OX=9606 GN=HIST1H1C PE=1 SV=2	3	0.000943761	0.000767629	0.444239	1	1.22945	0.298013
HIST1H1E	P10412	sp|P10412|H14_HUMAN Histone H1.4 OS=Homo sapiens OX=9606 GN=HIST1H1E PE=1 SV=2;sp|P16402|H13_HUMAN Histone H1.3 OS=Homo sapiens OX=9606 GN=HIST1H1D PE=1 SV=2	5	0.0126299	0.0132121	0.421842	1	0.955936	-0.0650148
HIST1H2BM	Q99879	sp|Q99879|H2B1M_HUMAN Histone H2B type 1-M OS=Homo sapiens OX=9606 GN=HIST1H2BM PE=1 SV=3;sp|Q99877|H2B1N_HUMAN Histone H2B type 1-N OS=Homo sapiens OX=9606 GN=HIST1H2BN PE=1 SV=3;sp|Q93079|H2B1H_HUMAN Histone H2B type 1-H OS=Homo sapiens OX=9606 GN=HIST1H	2	0.00351051	0.00485304	0.263799	1	0.723364	-0.467206
HIST1H3A	P68431	sp|P68431|H31_HUMAN Histone H3.1 OS=Homo sapiens OX=9606 GN=HIST1H3A PE=1 SV=2;sp|Q16695|H31T_HUMAN Histone H3.1t OS=Homo sapiens OX=9606 GN=HIST3H3 PE=1 SV=3;sp|Q6NXT2|H3C_HUMAN Histone H3.3C OS=Homo sapiens OX=9606 GN=H3F3C PE=1 SV=3	1	0.00163095	0.00145591	0.48566	1	1.12022	0.163787
HIST1H4A	P62805	sp|P62805|H4_HUMAN Histone H4 OS=Homo sapiens OX=9606 GN=HIST1H4A PE=1 SV=2	9	0.0513151	0.0590483	0.364775	1	0.869036	-0.202513
HIST2H2AA3	Q6FI13	sp|Q6FI13|H2A2A_HUMAN Histone H2A type 2-A OS=Homo sapiens OX=9606 GN=HIST2H2AA3 PE=1 SV=3;sp|Q16777|H2A2C_HUMAN Histone H2A type 2-C OS=Homo sapiens OX=9606 GN=HIST2H2AC PE=1 SV=4	1	0.000118343	0.000267563	0.0810012	1	0.4423	-1.1769
HIST2H2AB	Q8IUE6	sp|Q8IUE6|H2A2B_HUMAN Histone H2A type 2-B OS=Homo sapiens OX=9606 GN=HIST2H2AB PE=1 SV=3	1	0.000456466	0.000431791	0.483913	1	1.05715	0.0801738
HIST2H2BE	Q16778	sp|Q16778|H2B2E_HUMAN Histone H2B type 2-E OS=Homo sapiens OX=9606 GN=HIST2H2BE PE=1 SV=3;sp|P33778|H2B1B_HUMAN Histone H2B type 1-B OS=Homo sapiens OX=9606 GN=HIST1H2BB PE=1 SV=2;sp|P23527|H2B1O_HUMAN Histone H2B type 1-O OS=Homo sapiens OX=9606 GN=HIST1H	2	0.0408731	0.0546197	0.281359	1	0.748321	-0.418271
HIST2H3A	Q71DI3	sp|Q71DI3|H32_HUMAN Histone H3.2 OS=Homo sapiens OX=9606 GN=HIST2H3A PE=1 SV=3	1	0.0285416	0.0411493	0.242857	1	0.693609	-0.527805
HK1	P19367	sp|P19367|HXK1_HUMAN Hexokinase-1 OS=Homo sapiens OX=9606 GN=HK1 PE=1 SV=3	30	0.000149172	0.000135442	0.493247	1	1.10137	0.139299
HK2	P52789	sp|P52789|HXK2_HUMAN Hexokinase-2 OS=Homo sapiens OX=9606 GN=HK2 PE=1 SV=2	15	2.29725e-05	5.97865e-06	0.0781765	1	3.84242	1.94202
HLA-C	P10321	sp|P10321|1C07_HUMAN HLA class I histocompatibility antigen, Cw-7 alpha chain OS=Homo sapiens OX=9606 GN=HLA-C PE=1 SV=3	1	0.000135249	5.73876e-05	0.192267	1	2.35677	1.23681
HLA-DRA	P01903	sp|P01903|DRA_HUMAN HLA class II histocompatibility antigen, DR alpha chain OS=Homo sapiens OX=9606 GN=HLA-DRA PE=1 SV=1;sp|P01906|DQA2_HUMAN HLA class II histocompatibility antigen, DQ alpha 2 chain OS=Homo sapiens OX=9606 GN=HLA-DQA2 PE=1 SV=2	2	7.82655e-06	2.06669e-05	0.0504686	1	0.378699	-1.40088
HLA-DRB1	P20039	sp|P20039|2B1B_HUMAN HLA class II histocompatibility antigen, DRB1-11 beta chain OS=Homo sapiens OX=9606 GN=HLA-DRB1 PE=1 SV=1;sp|P04440|DPB1_HUMAN HLA class II histocompatibility antigen, DP beta 1 chain OS=Homo sapiens OX=9606 GN=HLA-DPB1 PE=1 SV=1;sp|Q9	2	3.31659e-08	8.08224e-06	1.77066e-18	4	0.00410355	-7.92891
HLA-G	P17693	sp|P17693|HLAG_HUMAN HLA class I histocompatibility antigen, alpha chain G OS=Homo sapiens OX=9606 GN=HLA-G PE=1 SV=1	1	6.91163e-05	9.1894e-05	0.284035	1	0.752131	-0.410945
HM13	Q8TCT9	sp|Q8TCT9|HM13_HUMAN Minor histocompatibility antigen H13 OS=Homo sapiens OX=9606 GN=HM13 PE=1 SV=1	9	0.000376908	0.000415184	0.390624	1	0.907809	-0.139539
HMBS	P08397	sp|P08397|HEM3_HUMAN Porphobilinogen deaminase OS=Homo sapiens OX=9606 GN=HMBS PE=1 SV=2	2	8.27407e-06	6.15394e-08	3.29382e-08	4	134.451	7.07094
HMGA1	P17096	sp|P17096|HMGA1_HUMAN High mobility group protein HMG-I/HMG-Y OS=Homo sapiens OX=9606 GN=HMGA1 PE=1 SV=3	9	0.00238675	0.00230658	0.470627	1	1.03476	0.0492945
HMGA2	P52926	sp|P52926|HMGA2_HUMAN High mobility group protein HMGI-C OS=Homo sapiens OX=9606 GN=HMGA2 PE=1 SV=1	3	6.45417e-05	6.15394e-08	6.57093e-15	4	1048.79	10.0345
HMGB1	P09429	sp|P09429|HMGB1_HUMAN High mobility group protein B1 OS=Homo sapiens OX=9606 GN=HMGB1 PE=1 SV=3;sp|B2RPK0|HGB1A_HUMAN Putative high mobility group protein B1-like 1 OS=Homo sapiens OX=9606 GN=HMGB1P1 PE=5 SV=1	8	0.00253592	0.00226967	0.486825	1	1.11731	0.160027
HMGB2	P26583	sp|P26583|HMGB2_HUMAN High mobility group protein B2 OS=Homo sapiens OX=9606 GN=HMGB2 PE=1 SV=2	5	0.00076376	0.00106841	0.257811	1	0.714859	-0.484269
HMGB3	O15347	sp|O15347|HMGB3_HUMAN High mobility group protein B3 OS=Homo sapiens OX=9606 GN=HMGB3 PE=1 SV=4	6	0.000382874	0.000256491	0.360276	1	1.49274	0.577962
HMGCL	P35914	sp|P35914|HMGCL_HUMAN Hydroxymethylglutaryl-CoA lyase, mitochondrial OS=Homo sapiens OX=9606 GN=HMGCL PE=1 SV=2	5	1.48177e-05	2.26967e-05	0.214324	1	0.652858	-0.615158
HMGN1	P05114	sp|P05114|HMGN1_HUMAN Non-histone chromosomal protein HMG-14 OS=Homo sapiens OX=9606 GN=HMGN1 PE=1 SV=3	4	0.000187957	4.35482e-05	0.0608437	1	4.31606	2.10972
HMGN2	P05204	sp|P05204|HMGN2_HUMAN Non-histone chromosomal protein HMG-17 OS=Homo sapiens OX=9606 GN=HMGN2 PE=1 SV=3;sp|Q15651|HMGN3_HUMAN High mobility group nucleosome-binding domain-containing protein 3 OS=Homo sapiens OX=9606 GN=HMGN3 PE=1 SV=2	1	0.00220774	0.00135996	0.32572	1	1.62339	0.699011
HMOX1	P09601	sp|P09601|HMOX1_HUMAN Heme oxygenase 1 OS=Homo sapiens OX=9606 GN=HMOX1 PE=1 SV=1	1	3.31659e-08	2.1036e-06	2.1294e-11	4	0.0157663	-5.98702
HMOX2	P30519	sp|P30519|HMOX2_HUMAN Heme oxygenase 2 OS=Homo sapiens OX=9606 GN=HMOX2 PE=1 SV=2	10	9.69617e-05	0.000119942	0.323318	1	0.808405	-0.306849
HNRNPA0	Q13151	sp|Q13151|ROA0_HUMAN Heterogeneous nuclear ribonucleoprotein A0 OS=Homo sapiens OX=9606 GN=HNRNPA0 PE=1 SV=1	9	0.000750832	0.00073995	0.458508	1	1.01471	0.0210626
HNRNPA1	P09651	sp|P09651|ROA1_HUMAN Heterogeneous nuclear ribonucleoprotein A1 OS=Homo sapiens OX=9606 GN=HNRNPA1 PE=1 SV=5;sp|Q32P51|RA1L2_HUMAN Heterogeneous nuclear ribonucleoprotein A1-like 2 OS=Homo sapiens OX=9606 GN=HNRNPA1L2 PE=2 SV=2	12	0.00206852	0.0024542	0.347008	1	0.842849	-0.246655
HNRNPA2B1	P22626	sp|P22626|ROA2_HUMAN Heterogeneous nuclear ribonucleoproteins A2/B1 OS=Homo sapiens OX=9606 GN=HNRNPA2B1 PE=1 SV=2	18	0.00350057	0.0035429	0.442086	1	0.988051	-0.0173427
HNRNPA3	P51991	sp|P51991|ROA3_HUMAN Heterogeneous nuclear ribonucleoprotein A3 OS=Homo sapiens OX=9606 GN=HNRNPA3 PE=1 SV=2	13	0.000903982	0.000902333	0.450617	1	1.00183	0.00263401
HNRNPAB	Q99729	sp|Q99729|ROAA_HUMAN Heterogeneous nuclear ribonucleoprotein A/B OS=Homo sapiens OX=9606 GN=HNRNPAB PE=1 SV=2	7	0.000276465	0.000117728	0.193365	1	2.34835	1.23164
HNRNPC	P07910	sp|P07910|HNRPC_HUMAN Heterogeneous nuclear ribonucleoproteins C1/C2 OS=Homo sapiens OX=9606 GN=HNRNPC PE=1 SV=4	20	0.00140222	0.00144299	0.431866	1	0.97174	-0.0413572
HNRNPD	Q14103	sp|Q14103|HNRPD_HUMAN Heterogeneous nuclear ribonucleoprotein D0 OS=Homo sapiens OX=9606 GN=HNRNPD PE=1 SV=1	10	0.0012431	0.00109239	0.478644	1	1.13796	0.186447
HNRNPDL	O14979	sp|O14979|HNRDL_HUMAN Heterogeneous nuclear ribonucleoprotein D-like OS=Homo sapiens OX=9606 GN=HNRNPDL PE=1 SV=3	6	0.000172045	0.000256491	0.226826	1	0.670763	-0.576125
HNRNPF	P52597	sp|P52597|HNRPF_HUMAN Heterogeneous nuclear ribonucleoprotein F OS=Homo sapiens OX=9606 GN=HNRNPF PE=1 SV=3	9	0.000327184	0.000308159	0.486606	1	1.06174	0.0864277
HNRNPH1	P31943	sp|P31943|HNRH1_HUMAN Heterogeneous nuclear ribonucleoprotein H OS=Homo sapiens OX=9606 GN=HNRNPH1 PE=1 SV=4	11	0.00140222	0.00149835	0.40893	1	0.935839	-0.0956683
HNRNPH2	P55795	sp|P55795|HNRH2_HUMAN Heterogeneous nuclear ribonucleoprotein H2 OS=Homo sapiens OX=9606 GN=HNRNPH2 PE=1 SV=1	5	8.65197e-05	7.98998e-05	0.498848	1	1.08285	0.114837
HNRNPH3	P31942	sp|P31942|HNRH3_HUMAN Heterogeneous nuclear ribonucleoprotein H3 OS=Homo sapiens OX=9606 GN=HNRNPH3 PE=1 SV=2	13	0.000369946	0.000422565	0.36911	1	0.875478	-0.191857
HNRNPK	P61978	sp|P61978|HNRPK_HUMAN Heterogeneous nuclear ribonucleoprotein K OS=Homo sapiens OX=9606 GN=HNRNPK PE=1 SV=1	23	0.00223758	0.00219586	0.461119	1	1.019	0.0271516
HNRNPL	P14866	sp|P14866|HNRPL_HUMAN Heterogeneous nuclear ribonucleoprotein L OS=Homo sapiens OX=9606 GN=HNRNPL PE=1 SV=2	20	0.00100442	0.000941083	0.489858	1	1.06731	0.0939743
HNRNPLL	Q8WVV9	sp|Q8WVV9|HNRLL_HUMAN Heterogeneous nuclear ribonucleoprotein L-like OS=Homo sapiens OX=9606 GN=HNRNPLL PE=1 SV=1	5	1.27293e-06	3.63516e-06	0.0390017	2	0.350172	-1.51386
HNRNPM	P52272	sp|P52272|HNRPM_HUMAN Heterogeneous nuclear ribonucleoprotein M OS=Homo sapiens OX=9606 GN=HNRNPM PE=1 SV=3	43	0.000809506	0.000610781	0.411213	1	1.32536	0.406386
HNRNPR	O43390	sp|O43390|HNRPR_HUMAN Heterogeneous nuclear ribonucleoprotein R OS=Homo sapiens OX=9606 GN=HNRNPR PE=1 SV=1	22	0.000548952	0.000514828	0.489262	1	1.06628	0.0925913
HNRNPU	Q00839	sp|Q00839|HNRPU_HUMAN Heterogeneous nuclear ribonucleoprotein U OS=Homo sapiens OX=9606 GN=HNRNPU PE=1 SV=6	33	0.000994479	0.000828522	0.45488	1	1.2003	0.263401
HNRNPUL1	Q9BUJ2	sp|Q9BUJ2|HNRL1_HUMAN Heterogeneous nuclear ribonucleoprotein U-like protein 1 OS=Homo sapiens OX=9606 GN=HNRNPUL1 PE=1 SV=2	20	9.55694e-05	8.04534e-05	0.459504	1	1.18789	0.248396
HNRNPUL2	Q1KMD3	sp|Q1KMD3|HNRL2_HUMAN Heterogeneous nuclear ribonucleoprotein U-like protein 2 OS=Homo sapiens OX=9606 GN=HNRNPUL2 PE=1 SV=1	22	0.000174034	0.00013415	0.420567	1	1.2973	0.375516
HOOK3	Q86VS8	sp|Q86VS8|HOOK3_HUMAN Protein Hook homolog 3 OS=Homo sapiens OX=9606 GN=HOOK3 PE=1 SV=2	4	4.87295e-06	1.55002e-06	0.116527	1	3.1438	1.65251
HP1BP3	Q5SSJ5	sp|Q5SSJ5|HP1B3_HUMAN Heterochromatin protein 1-binding protein 3 OS=Homo sapiens OX=9606 GN=HP1BP3 PE=1 SV=1	20	0.000205857	0.000186371	0.491957	1	1.10455	0.143464
HPCAL1	P37235	sp|P37235|HPCL1_HUMAN Hippocalcin-like protein 1 OS=Homo sapiens OX=9606 GN=HPCAL1 PE=1 SV=3;sp|P84074|HPCA_HUMAN Neuron-specific calcium-binding protein hippocalcin OS=Homo sapiens OX=9606 GN=HPCA PE=1 SV=2	14	0.000635472	0.000723342	0.371152	1	0.878522	-0.18685
HPRT1	P00492	sp|P00492|HPRT_HUMAN Hypoxanthine-guanine phosphoribosyltransferase OS=Homo sapiens OX=9606 GN=HPRT1 PE=1 SV=2	9	0.000132266	0.000106287	0.438885	1	1.24442	0.315474
HRAS	P01112	sp|P01112|RASH_HUMAN GTPase HRas OS=Homo sapiens OX=9606 GN=HRAS PE=1 SV=1	2	1.54144e-05	1.71794e-05	0.383651	1	0.897263	-0.156397
HS2ST1	Q7LGA3	sp|Q7LGA3|HS2ST_HUMAN Heparan sulfate 2-O-sulfotransferase 1 OS=Homo sapiens OX=9606 GN=HS2ST1 PE=1 SV=1	3	8.25418e-06	3.22921e-06	0.168383	1	2.5561	1.35394
HSBP1	O75506	sp|O75506|HSBP1_HUMAN Heat shock factor-binding protein 1 OS=Homo sapiens OX=9606 GN=HSBP1 PE=1 SV=1	2	0.000198896	0.000120311	0.318412	1	1.65318	0.725244
HSD17B10	Q99714	sp|Q99714|HCD2_HUMAN 3-hydroxyacyl-CoA dehydrogenase type-2 OS=Homo sapiens OX=9606 GN=HSD17B10 PE=1 SV=3	15	0.000366963	0.000437327	0.344449	1	0.839104	-0.253078
HSD17B11	Q8NBQ5	sp|Q8NBQ5|DHB11_HUMAN Estradiol 17-beta-dehydrogenase 11 OS=Homo sapiens OX=9606 GN=HSD17B11 PE=1 SV=3	14	0.000237681	0.000258337	0.398655	1	0.920042	-0.120228
HSD17B12	Q53GQ0	sp|Q53GQ0|DHB12_HUMAN Very-long-chain 3-oxoacyl-CoA reductase OS=Homo sapiens OX=9606 GN=HSD17B12 PE=1 SV=2	9	0.000221769	0.000313694	0.252249	1	0.706958	-0.500303
HSD17B4	P51659	sp|P51659|DHB4_HUMAN Peroxisomal multifunctional enzyme type 2 OS=Homo sapiens OX=9606 GN=HSD17B4 PE=1 SV=3	22	0.000121326	0.00013452	0.386739	1	0.901925	-0.148921
HSDL1	Q3SXM5	sp|Q3SXM5|HSDL1_HUMAN Inactive hydroxysteroid dehydrogenase-like protein 1 OS=Homo sapiens OX=9606 GN=HSDL1 PE=1 SV=3	3	2.60554e-06	3.506e-06	0.277735	1	0.743166	-0.428244
HSDL2	Q6YN16	sp|Q6YN16|HSDL2_HUMAN Hydroxysteroid dehydrogenase-like protein 2 OS=Homo sapiens OX=9606 GN=HSDL2 PE=1 SV=1	18	0.000117349	0.000137656	0.353565	1	0.852474	-0.230272
HSP90AA1	P07900	sp|P07900|HS90A_HUMAN Heat shock protein HSP 90-alpha OS=Homo sapiens OX=9606 GN=HSP90AA1 PE=1 SV=5	25	0.00377902	0.00306313	0.442707	1	1.23371	0.303004
HSP90AA4P	Q58FG1	sp|Q58FG1|HS904_HUMAN Putative heat shock protein HSP 90-alpha A4 OS=Homo sapiens OX=9606 GN=HSP90AA4P PE=5 SV=1	1	7.00113e-06	6.16317e-06	0.479428	1	1.13596	0.183916
HSP90AB1	P08238	sp|P08238|HS90B_HUMAN Heat shock protein HSP 90-beta OS=Homo sapiens OX=9606 GN=HSP90AB1 PE=1 SV=4	20	0.0021083	0.00195598	0.495982	1	1.07787	0.108188
HSP90AB2P	Q58FF8	sp|Q58FF8|H90B2_HUMAN Putative heat shock protein HSP 90-beta 2 OS=Homo sapiens OX=9606 GN=HSP90AB2P PE=1 SV=2	1	0.000103426	7.97153e-05	0.420521	1	1.29744	0.375668
HSP90AB4P	Q58FF6	sp|Q58FF6|H90B4_HUMAN Putative heat shock protein HSP 90-beta 4 OS=Homo sapiens OX=9606 GN=HSP90AB4P PE=5 SV=1	1	5.30057e-05	6.15394e-08	3.6119e-14	4	861.329	9.75042
HSP90B1	P14625	sp|P14625|ENPL_HUMAN Endoplasmin OS=Homo sapiens OX=9606 GN=HSP90B1 PE=1 SV=1	50	0.00291382	0.00359826	0.324275	1	0.809787	-0.304385
HSPA13	P48723	sp|P48723|HSP13_HUMAN Heat shock 70 kDa protein 13 OS=Homo sapiens OX=9606 GN=HSPA13 PE=1 SV=1	5	4.33593e-06	8.1007e-06	0.135433	1	0.535254	-0.901705
HSPA14	Q0VDF9	sp|Q0VDF9|HSP7E_HUMAN Heat shock 70 kDa protein 14 OS=Homo sapiens OX=9606 GN=HSPA14 PE=1 SV=1	4	1.68067e-06	4.09648e-06	0.06482	1	0.410272	-1.28535
HSPA1B	P0DMV9	sp|P0DMV9|HS71B_HUMAN Heat shock 70 kDa protein 1B OS=Homo sapiens OX=9606 GN=HSPA1B PE=1 SV=1;sp|P0DMV8|HS71A_HUMAN Heat shock 70 kDa protein 1A OS=Homo sapiens OX=9606 GN=HSPA1A PE=1 SV=1	12	0.000484311	0.000269408	0.285674	1	1.79769	0.846142
HSPA4	P34932	sp|P34932|HSP74_HUMAN Heat shock 70 kDa protein 4 OS=Homo sapiens OX=9606 GN=HSPA4 PE=1 SV=4	35	0.000269504	0.000208514	0.422195	1	1.29249	0.370158
HSPA4L	O95757	sp|O95757|HS74L_HUMAN Heat shock 70 kDa protein 4L OS=Homo sapiens OX=9606 GN=HSPA4L PE=1 SV=3	10	6.87185e-06	2.04824e-06	0.102863	1	3.355	1.74631
HSPA5	P11021	sp|P11021|BIP_HUMAN Endoplasmic reticulum chaperone BiP OS=Homo sapiens OX=9606 GN=HSPA5 PE=1 SV=2	34	0.00399781	0.00398576	0.451352	1	1.00302	0.00435237
HSPA6	P17066	sp|P17066|HSP76_HUMAN Heat shock 70 kDa protein 6 OS=Homo sapiens OX=9606 GN=HSPA6 PE=1 SV=2;sp|P48741|HSP77_HUMAN Putative heat shock 70 kDa protein 7 OS=Homo sapiens OX=9606 GN=HSPA7 PE=5 SV=2	1	0.000322211	0.000300778	0.492157	1	1.07126	0.09931
HSPA8	P11142	sp|P11142|HSP7C_HUMAN Heat shock cognate 71 kDa protein OS=Homo sapiens OX=9606 GN=HSPA8 PE=1 SV=1	26	0.00391825	0.00321075	0.447529	1	1.22035	0.287297
HSPA9	P38646	sp|P38646|GRP75_HUMAN Stress-70 protein, mitochondrial OS=Homo sapiens OX=9606 GN=HSPA9 PE=1 SV=2	33	0.000964645	0.00119388	0.32303	1	0.807989	-0.307593
HSPB1	P04792	sp|P04792|HSPB1_HUMAN Heat shock protein beta-1 OS=Homo sapiens OX=9606 GN=HSPB1 PE=1 SV=2	13	0.00108398	0.000839594	0.422676	1	1.29108	0.368578
HSPB11	Q9Y547	sp|Q9Y547|IFT25_HUMAN Intraflagellar transport protein 25 homolog OS=Homo sapiens OX=9606 GN=HSPB11 PE=1 SV=1	1	7.86633e-05	6.15394e-08	1.12967e-15	4	1278.26	10.32
HSPBP1	Q9NZL4	sp|Q9NZL4|HPBP1_HUMAN Hsp70-binding protein 1 OS=Homo sapiens OX=9606 GN=HSPBP1 PE=1 SV=2	5	8.53263e-06	6.32924e-06	0.403803	1	1.34813	0.430957
HSPD1	P10809	sp|P10809|CH60_HUMAN 60 kDa heat shock protein, mitochondrial OS=Homo sapiens OX=9606 GN=HSPD1 PE=1 SV=2	38	0.00375913	0.00507447	0.276066	1	0.740793	-0.432857
HSPE1	P61604	sp|P61604|CH10_HUMAN 10 kDa heat shock protein, mitochondrial OS=Homo sapiens OX=9606 GN=HSPE1 PE=1 SV=2	11	0.00382874	0.00444708	0.359319	1	0.860957	-0.215987
HSPH1	Q92598	sp|Q92598|HS105_HUMAN Heat shock protein 105 kDa OS=Homo sapiens OX=9606 GN=HSPH1 PE=1 SV=1	25	0.000125304	5.53578e-05	0.204875	1	2.26353	1.17858
HTATIP2	Q9BUP3	sp|Q9BUP3|HTAI2_HUMAN Oxidoreductase HTATIP2 OS=Homo sapiens OX=9606 GN=HTATIP2 PE=1 SV=2	6	2.38675e-05	7.52866e-06	0.1147	1	3.17022	1.66458
HTATSF1	O43719	sp|O43719|HTSF1_HUMAN HIV Tat-specific factor 1 OS=Homo sapiens OX=9606 GN=HTATSF1 PE=1 SV=1	14	2.40664e-05	1.55371e-05	0.344887	1	1.54896	0.631303
HTRA1	Q92743	sp|Q92743|HTRA1_HUMAN Serine protease HTRA1 OS=Homo sapiens OX=9606 GN=HTRA1 PE=1 SV=1	9	0.000142211	3.8935e-05	0.0868149	1	3.65251	1.86889
HUWE1	Q7Z6Z7	sp|Q7Z6Z7|HUWE1_HUMAN E3 ubiquitin-protein ligase HUWE1 OS=Homo sapiens OX=9606 GN=HUWE1 PE=1 SV=3	55	2.21769e-05	1.39686e-05	0.334766	1	1.58762	0.666867
HYI	Q5T013	sp|Q5T013|HYI_HUMAN Putative hydroxypyruvate isomerase OS=Homo sapiens OX=9606 GN=HYI PE=1 SV=2	1	2.91382e-06	6.15394e-08	1.15649e-05	4	47.3489	5.56526
HYOU1	Q9Y4L1	sp|Q9Y4L1|HYOU1_HUMAN Hypoxia up-regulated protein 1 OS=Homo sapiens OX=9606 GN=HYOU1 PE=1 SV=1	39	0.000389836	0.000485304	0.319768	1	0.803282	-0.316021
HYPK	Q9NX55	sp|Q9NX55|HYPK_HUMAN Huntingtin-interacting protein K OS=Homo sapiens OX=9606 GN=HYPK PE=1 SV=2	2	5.74809e-05	4.5947e-05	0.436547	1	1.25103	0.323112
IAH1	Q2TAA2	sp|Q2TAA2|IAH1_HUMAN Isoamyl acetate-hydrolyzing esterase 1 homolog OS=Homo sapiens OX=9606 GN=IAH1 PE=1 SV=1	1	7.22986e-06	5.88638e-06	0.444676	1	1.22824	0.296587
IARS	P41252	sp|P41252|SYIC_HUMAN Isoleucine--tRNA ligase, cytoplasmic OS=Homo sapiens OX=9606 GN=IARS PE=1 SV=2	33	9.35805e-05	7.38104e-05	0.430657	1	1.26785	0.342383
IARS2	Q9NSE4	sp|Q9NSE4|SYIM_HUMAN Isoleucine--tRNA ligase, mitochondrial OS=Homo sapiens OX=9606 GN=IARS2 PE=1 SV=2	32	0.000136244	0.000158877	0.357005	1	0.857542	-0.221721
ICAM1	P05362	sp|P05362|ICAM1_HUMAN Intercellular adhesion molecule 1 OS=Homo sapiens OX=9606 GN=ICAM1 PE=1 SV=2	11	4.26632e-05	2.91551e-05	0.368658	1	1.46332	0.549241
ICMT	O60725	sp|O60725|ICMT_HUMAN Protein-S-isoprenylcysteine O-methyltransferase OS=Homo sapiens OX=9606 GN=ICMT PE=1 SV=1	1	3.31659e-08	8.24832e-06	1.33875e-18	4	0.00402093	-7.95826
IDE	P14735	sp|P14735|IDE_HUMAN Insulin-degrading enzyme OS=Homo sapiens OX=9606 GN=IDE PE=1 SV=4	9	9.14921e-06	4.2441e-06	0.220754	1	2.15575	1.10819
IDH1	O75874	sp|O75874|IDHC_HUMAN Isocitrate dehydrogenase [NADP] cytoplasmic OS=Homo sapiens OX=9606 GN=IDH1 PE=1 SV=2	7	2.17791e-05	1.74562e-05	0.437742	1	1.24764	0.319207
IDH2	P48735	sp|P48735|IDHP_HUMAN Isocitrate dehydrogenase [NADP], mitochondrial OS=Homo sapiens OX=9606 GN=IDH2 PE=1 SV=2	15	6.31494e-05	6.7352e-05	0.41007	1	0.937602	-0.0929517
IDH3A	P50213	sp|P50213|IDH3A_HUMAN Isocitrate dehydrogenase [NAD] subunit alpha, mitochondrial OS=Homo sapiens OX=9606 GN=IDH3A PE=1 SV=1	9	7.21992e-05	8.65427e-05	0.341133	1	0.83426	-0.26143
IDH3B	O43837	sp|O43837|IDH3B_HUMAN Isocitrate dehydrogenase [NAD] subunit beta, mitochondrial OS=Homo sapiens OX=9606 GN=IDH3B PE=1 SV=2	9	3.04311e-05	4.02267e-05	0.287096	1	0.756489	-0.402608
IDH3G	P51553	sp|P51553|IDH3G_HUMAN Isocitrate dehydrogenase [NAD] subunit gamma, mitochondrial OS=Homo sapiens OX=9606 GN=IDH3G PE=1 SV=1	8	5.61881e-05	5.92329e-05	0.417148	1	0.948596	-0.0761343
IER3IP1	Q9Y5U9	sp|Q9Y5U9|IR3IP_HUMAN Immediate early response 3-interacting protein 1 OS=Homo sapiens OX=9606 GN=IER3IP1 PE=1 SV=1	1	0.000156133	0.000180282	0.362761	1	0.86605	-0.207478
IFI16	Q16666	sp|Q16666|IF16_HUMAN Gamma-interferon-inducible protein 16 OS=Homo sapiens OX=9606 GN=IFI16 PE=1 SV=3	16	3.82874e-05	3.10004e-05	0.442222	1	1.23506	0.304585
IFIT1	P09914	sp|P09914|IFIT1_HUMAN Interferon-induced protein with tetratricopeptide repeats 1 OS=Homo sapiens OX=9606 GN=IFIT1 PE=1 SV=2	3	3.38123e-06	2.17741e-06	0.343848	1	1.55287	0.634936
IFIT2	P09913	sp|P09913|IFIT2_HUMAN Interferon-induced protein with tetratricopeptide repeats 2 OS=Homo sapiens OX=9606 GN=IFIT2 PE=1 SV=1	2	3.32156e-06	1.88217e-06	0.292758	1	1.76475	0.819467
IFIT3	O14879	sp|O14879|IFIT3_HUMAN Interferon-induced protein with tetratricopeptide repeats 3 OS=Homo sapiens OX=9606 GN=IFIT3 PE=1 SV=1	5	1.61106e-05	1.21787e-05	0.412042	1	1.32285	0.403644
IFIT5	Q13325	sp|Q13325|IFIT5_HUMAN Interferon-induced protein with tetratricopeptide repeats 5 OS=Homo sapiens OX=9606 GN=IFIT5 PE=1 SV=1	2	6.71273e-06	6.15394e-08	1.18506e-07	4	109.08	6.76925
IFITM3	Q01628	sp|Q01628|IFM3_HUMAN Interferon-induced transmembrane protein 3 OS=Homo sapiens OX=9606 GN=IFITM3 PE=1 SV=2;sp|P13164|IFM1_HUMAN Interferon-induced transmembrane protein 1 OS=Homo sapiens OX=9606 GN=IFITM1 PE=1 SV=3;sp|Q01629|IFM2_HUMAN Interferon-induced	2	0.000270498	0.000271253	0.447772	1	0.997217	-0.00402132
IFRD2	Q12894	sp|Q12894|IFRD2_HUMAN Interferon-related developmental regulator 2 OS=Homo sapiens OX=9606 GN=IFRD2 PE=1 SV=3	2	3.31659e-08	6.15394e-08	0.137773	1	0.538937	-0.891812
IGBP1	P78318	sp|P78318|IGBP1_HUMAN Immunoglobulin-binding protein 1 OS=Homo sapiens OX=9606 GN=IGBP1 PE=1 SV=1	5	9.77573e-06	5.38816e-06	0.28218	1	1.8143	0.859411
IGF2BP2	Q9Y6M1	sp|Q9Y6M1|IF2B2_HUMAN Insulin-like growth factor 2 mRNA-binding protein 2 OS=Homo sapiens OX=9606 GN=IGF2BP2 PE=1 SV=2	13	6.5934e-05	4.65006e-05	0.382056	1	1.41792	0.503773
IGF2BP3	O00425	sp|O00425|IF2B3_HUMAN Insulin-like growth factor 2 mRNA-binding protein 3 OS=Homo sapiens OX=9606 GN=IGF2BP3 PE=1 SV=2	6	9.91496e-06	4.90839e-06	0.242979	1	2.02	1.01436
IGF2R	P11717	sp|P11717|MPRI_HUMAN Cation-independent mannose-6-phosphate receptor OS=Homo sapiens OX=9606 GN=IGF2R PE=1 SV=3	49	4.07736e-05	2.97087e-05	0.396062	1	1.37245	0.456751
IGFBP7	Q16270	sp|Q16270|IBP7_HUMAN Insulin-like growth factor-binding protein 7 OS=Homo sapiens OX=9606 GN=IGFBP7 PE=1 SV=1	5	8.67186e-06	1.72716e-05	0.114921	1	0.502086	-0.993992
IK	Q13123	sp|Q13123|RED_HUMAN Protein Red OS=Homo sapiens OX=9606 GN=IK PE=1 SV=3	8	1.50166e-05	1.86371e-05	0.32147	1	0.805737	-0.311619
IKBIP	Q70UQ0	sp|Q70UQ0|IKIP_HUMAN Inhibitor of nuclear factor kappa-B kinase-interacting protein OS=Homo sapiens OX=9606 GN=IKBIP PE=1 SV=1	14	0.000176023	0.000184526	0.420554	1	0.953918	-0.0680625
IKBKB	O14920	sp|O14920|IKKB_HUMAN Inhibitor of nuclear factor kappa-B kinase subunit beta OS=Homo sapiens OX=9606 GN=IKBKB PE=1 SV=1	2	1.02431e-06	8.8757e-07	0.472372	1	1.15406	0.206724
IKBKG	Q9Y6K9	sp|Q9Y6K9|NEMO_HUMAN NF-kappa-B essential modulator OS=Homo sapiens OX=9606 GN=IKBKG PE=1 SV=2	3	3.77902e-06	2.76789e-06	0.398317	1	1.36531	0.449225
IL10RB	Q08334	sp|Q08334|I10R2_HUMAN Interleukin-10 receptor subunit beta OS=Homo sapiens OX=9606 GN=IL10RB PE=1 SV=2	1	2.85416e-06	6.15394e-08	1.28181e-05	4	46.3793	5.53541
IL1RAP	Q9NPH3	sp|Q9NPH3|IL1AP_HUMAN Interleukin-1 receptor accessory protein OS=Homo sapiens OX=9606 GN=IL1RAP PE=1 SV=2	3	2.54587e-06	3.00778e-06	0.34945	1	0.846428	-0.24054
IL6ST	P40189	sp|P40189|IL6RB_HUMAN Interleukin-6 receptor subunit beta OS=Homo sapiens OX=9606 GN=IL6ST PE=1 SV=2	3	2.99338e-06	6.15394e-08	1.01073e-05	4	48.6417	5.60412
ILF2	Q12905	sp|Q12905|ILF2_HUMAN Interleukin enhancer-binding factor 2 OS=Homo sapiens OX=9606 GN=ILF2 PE=1 SV=2	19	0.000833373	0.000763938	0.497521	1	1.09089	0.125508
ILF3	Q12906	sp|Q12906|ILF3_HUMAN Interleukin enhancer-binding factor 3 OS=Homo sapiens OX=9606 GN=ILF3 PE=1 SV=3	30	0.000499229	0.000415184	0.454095	1	1.20243	0.265951
ILK	Q13418	sp|Q13418|ILK_HUMAN Integrin-linked protein kinase OS=Homo sapiens OX=9606 GN=ILK PE=1 SV=2	13	6.00665e-05	4.39172e-05	0.397552	1	1.36772	0.451775
ILKAP	Q9H0C8	sp|Q9H0C8|ILKAP_HUMAN Integrin-linked kinase-associated serine/threonine phosphatase 2C OS=Homo sapiens OX=9606 GN=ILKAP PE=1 SV=1	2	3.31659e-08	6.15394e-08	0.137773	1	0.538937	-0.891812
ILVBL	A1L0T0	sp|A1L0T0|ILVBL_HUMAN Acetolactate synthase-like protein OS=Homo sapiens OX=9606 GN=ILVBL PE=1 SV=2	15	5.44975e-05	4.35482e-05	0.436404	1	1.25143	0.323577
IMMT	Q16891	sp|Q16891|MIC60_HUMAN MICOS complex subunit MIC60 OS=Homo sapiens OX=9606 GN=IMMT PE=1 SV=1	36	0.000404753	0.000468696	0.361087	1	0.863572	-0.211612
IMP3	Q9NV31	sp|Q9NV31|IMP3_HUMAN U3 small nucleolar ribonucleoprotein protein IMP3 OS=Homo sapiens OX=9606 GN=IMP3 PE=1 SV=1	3	2.54587e-05	3.69052e-05	0.240207	1	0.689839	-0.535668
IMP4	Q96G21	sp|Q96G21|IMP4_HUMAN U3 small nucleolar ribonucleoprotein protein IMP4 OS=Homo sapiens OX=9606 GN=IMP4 PE=1 SV=1	3	8.0155e-06	8.02688e-06	0.448616	1	0.998582	-0.00204738
IMPA1	P29218	sp|P29218|IMPA1_HUMAN Inositol monophosphatase 1 OS=Homo sapiens OX=9606 GN=IMPA1 PE=1 SV=1	6	2.73482e-05	1.74931e-05	0.341072	1	1.56337	0.644661
IMPAD1	Q9NX62	sp|Q9NX62|IMPA3_HUMAN Inositol monophosphatase 3 OS=Homo sapiens OX=9606 GN=IMPAD1 PE=1 SV=1	6	5.36024e-06	1.68288e-05	0.0280624	2	0.318516	-1.65056
IMPDH1	P20839	sp|P20839|IMDH1_HUMAN Inosine-5-monophosphate dehydrogenase 1 OS=Homo sapiens OX=9606 GN=IMPDH1 PE=1 SV=2	5	1.86962e-05	9.83524e-06	0.264785	1	1.90094	0.926713
IMPDH2	P12268	sp|P12268|IMDH2_HUMAN Inosine-5-monophosphate dehydrogenase 2 OS=Homo sapiens OX=9606 GN=IMPDH2 PE=1 SV=2	21	0.000943761	0.000773164	0.447422	1	1.22065	0.287646
INF2	Q27J81	sp|Q27J81|INF2_HUMAN Inverted formin-2 OS=Homo sapiens OX=9606 GN=INF2 PE=1 SV=2	15	1.59117e-05	1.86371e-05	0.35444	1	0.853761	-0.228095
INPP1	P49441	sp|P49441|INPP_HUMAN Inositol polyphosphate 1-phosphatase OS=Homo sapiens OX=9606 GN=INPP1 PE=1 SV=1	1	4.1072e-06	6.15394e-08	1.94603e-06	4	66.7409	6.0605
INPP5K	Q9BT40	sp|Q9BT40|INP5K_HUMAN Inositol polyphosphate 5-phosphatase K OS=Homo sapiens OX=9606 GN=INPP5K PE=1 SV=3	2	1.50166e-06	2.34348e-06	0.205935	1	0.640783	-0.642092
INPPL1	O15357	sp|O15357|SHIP2_HUMAN Phosphatidylinositol 3,4,5-trisphosphate 5-phosphatase 2 OS=Homo sapiens OX=9606 GN=INPPL1 PE=1 SV=2	3	5.61881e-07	6.15394e-08	0.00848116	3	9.13041	3.19068
INTS10	Q9NVR2	sp|Q9NVR2|INT10_HUMAN Integrator complex subunit 10 OS=Homo sapiens OX=9606 GN=INTS10 PE=1 SV=2	3	5.80776e-07	6.15394e-08	0.00766274	3	9.43746	3.2384
INTS13	Q9NVM9	sp|Q9NVM9|INT13_HUMAN Integrator complex subunit 13 OS=Homo sapiens OX=9606 GN=INTS13 PE=1 SV=2	2	1.80995e-06	6.15394e-08	0.000108388	4	29.4112	4.8783
INTS14	Q96SY0	sp|Q96SY0|INT14_HUMAN Integrator complex subunit 14 OS=Homo sapiens OX=9606 GN=INTS14 PE=1 SV=2	2	8.14478e-06	6.15394e-08	3.63397e-08	4	132.351	7.04822
INTS2	Q9H0H0	sp|Q9H0H0|INT2_HUMAN Integrator complex subunit 2 OS=Homo sapiens OX=9606 GN=INTS2 PE=1 SV=2	2	3.31659e-08	6.15394e-08	0.137773	1	0.538937	-0.891812
INTS7	Q9NVH2	sp|Q9NVH2|INT7_HUMAN Integrator complex subunit 7 OS=Homo sapiens OX=9606 GN=INTS7 PE=1 SV=1	3	3.60996e-05	2.38039e-05	0.353661	1	1.51654	0.600787
IPO11	Q9UI26	sp|Q9UI26|IPO11_HUMAN Importin-11 OS=Homo sapiens OX=9606 GN=IPO11 PE=1 SV=1	3	5.02212e-06	2.41729e-06	0.233229	1	2.07758	1.0549
IPO4	Q8TEX9	sp|Q8TEX9|IPO4_HUMAN Importin-4 OS=Homo sapiens OX=9606 GN=IPO4 PE=1 SV=2	8	8.90059e-06	7.21497e-07	0.00321688	3	12.3363	3.62484
IPO5	O00410	sp|O00410|IPO5_HUMAN Importin-5 OS=Homo sapiens OX=9606 GN=IPO5 PE=1 SV=4	29	0.000159117	0.000143561	0.490422	1	1.10835	0.148418
IPO7	O95373	sp|O95373|IPO7_HUMAN Importin-7 OS=Homo sapiens OX=9606 GN=IPO7 PE=1 SV=1	24	0.000212819	0.000169395	0.434674	1	1.25635	0.329233
IPO9	Q96P70	sp|Q96P70|IPO9_HUMAN Importin-9 OS=Homo sapiens OX=9606 GN=IPO9 PE=1 SV=3	14	4.02764e-05	2.56491e-05	0.33926	1	1.57028	0.651025
IQCA1L	A6NCM1	sp|A6NCM1|IQCAL_HUMAN IQ and AAA domain-containing protein 1-like OS=Homo sapiens OX=9606 GN=IQCA1L PE=3 SV=3	1	2.23758e-06	6.15394e-08	4.13672e-05	4	36.3601	5.18428
IQGAP1	P46940	sp|P46940|IQGA1_HUMAN Ras GTPase-activating-like protein IQGAP1 OS=Homo sapiens OX=9606 GN=IQGAP1 PE=1 SV=1	65	0.000423648	0.000874654	0.104416	1	0.484361	-1.04585
IQGAP3	Q86VI3	sp|Q86VI3|IQGA3_HUMAN Ras GTPase-activating-like protein IQGAP3 OS=Homo sapiens OX=9606 GN=IQGAP3 PE=1 SV=2	21	1.02431e-05	8.41439e-06	0.448626	1	1.21734	0.283727
IRF2BP2	Q7Z5L9	sp|Q7Z5L9|I2BP2_HUMAN Interferon regulatory factor 2-binding protein 2 OS=Homo sapiens OX=9606 GN=IRF2BP2 PE=1 SV=2	5	6.53373e-06	6.15394e-08	1.3929e-07	4	106.171	6.73025
IRF3	Q14653	sp|Q14653|IRF3_HUMAN Interferon regulatory factor 3 OS=Homo sapiens OX=9606 GN=IRF3 PE=1 SV=1	1	4.90278e-06	6.15394e-08	7.34091e-07	4	79.6689	6.31595
ISCU	Q9H1K1	sp|Q9H1K1|ISCU_HUMAN Iron-sulfur cluster assembly enzyme ISCU, mitochondrial OS=Homo sapiens OX=9606 GN=ISCU PE=1 SV=2	3	5.05195e-06	6.15394e-08	6.20077e-07	4	82.0929	6.35919
ISG15	P05161	sp|P05161|ISG15_HUMAN Ubiquitin-like protein ISG15 OS=Homo sapiens OX=9606 GN=ISG15 PE=1 SV=5	5	0.00017105	0.000126216	0.401527	1	1.35522	0.438529
ISOC1	Q96CN7	sp|Q96CN7|ISOC1_HUMAN Isochorismatase domain-containing protein 1 OS=Homo sapiens OX=9606 GN=ISOC1 PE=1 SV=3	5	2.72487e-05	1.90062e-05	0.37734	1	1.43368	0.51972
ISOC2	Q96AB3	sp|Q96AB3|ISOC2_HUMAN Isochorismatase domain-containing protein 2 OS=Homo sapiens OX=9606 GN=ISOC2 PE=1 SV=1	2	1.41216e-05	6.15394e-08	9.79103e-10	4	229.472	7.84218
IST1	P53990	sp|P53990|IST1_HUMAN IST1 homolog OS=Homo sapiens OX=9606 GN=IST1 PE=1 SV=1	3	1.02431e-05	6.15394e-08	8.43641e-09	4	166.448	7.37893
ISY1	Q9ULR0	sp|Q9ULR0|ISY1_HUMAN Pre-mRNA-splicing factor ISY1 homolog OS=Homo sapiens OX=9606 GN=ISY1 PE=1 SV=3	4	1.42211e-05	2.4542e-05	0.164187	1	0.579458	-0.787223
ITCH	Q96J02	sp|Q96J02|ITCH_HUMAN E3 ubiquitin-protein ligase Itchy homolog OS=Homo sapiens OX=9606 GN=ITCH PE=1 SV=2	7	1.14365e-05	5.18518e-06	0.213225	1	2.20561	1.14118
ITGA2	P17301	sp|P17301|ITA2_HUMAN Integrin alpha-2 OS=Homo sapiens OX=9606 GN=ITGA2 PE=1 SV=1	21	4.52488e-05	3.81969e-05	0.460729	1	1.18462	0.244424
ITGA3	P26006	sp|P26006|ITA3_HUMAN Integrin alpha-3 OS=Homo sapiens OX=9606 GN=ITGA3 PE=1 SV=5	22	0.000188951	0.000262027	0.262214	1	0.721113	-0.471703
ITGA5	P08648	sp|P08648|ITA5_HUMAN Integrin alpha-5 OS=Homo sapiens OX=9606 GN=ITGA5 PE=1 SV=2	10	2.8641e-05	2.30658e-05	0.439849	1	1.24171	0.312329
ITGA6	P23229	sp|P23229|ITA6_HUMAN Integrin alpha-6 OS=Homo sapiens OX=9606 GN=ITGA6 PE=1 SV=5	27	5.54919e-05	6.08936e-05	0.392918	1	0.911293	-0.134013
ITGAV	P06756	sp|P06756|ITAV_HUMAN Integrin alpha-V OS=Homo sapiens OX=9606 GN=ITGAV PE=1 SV=2	13	1.20332e-05	1.12192e-05	0.492907	1	1.07256	0.101052
ITGB1	P05556	sp|P05556|ITB1_HUMAN Integrin beta-1 OS=Homo sapiens OX=9606 GN=ITGB1 PE=1 SV=2	22	0.000343095	0.000286015	0.455152	1	1.19957	0.262516
ITGB4	P16144	sp|P16144|ITB4_HUMAN Integrin beta-4 OS=Homo sapiens OX=9606 GN=ITGB4 PE=1 SV=5	30	2.93371e-05	2.54646e-05	0.473141	1	1.15208	0.204235
ITGB5	P18084	sp|P18084|ITB5_HUMAN Integrin beta-5 OS=Homo sapiens OX=9606 GN=ITGB5 PE=1 SV=1	11	9.43761e-06	1.05364e-05	0.382622	1	0.895711	-0.158894
ITGB6	P18564	sp|P18564|ITB6_HUMAN Integrin beta-6 OS=Homo sapiens OX=9606 GN=ITGB6 PE=1 SV=2	1	3.10277e-05	4.29946e-05	0.262604	1	0.721667	-0.470596
ITM2B	Q9Y287	sp|Q9Y287|ITM2B_HUMAN Integral membrane protein 2B OS=Homo sapiens OX=9606 GN=ITM2B PE=1 SV=1	2	1.80995e-05	1.64044e-05	0.49245	1	1.10334	0.141871
ITPA	Q9BY32	sp|Q9BY32|ITPA_HUMAN Inosine triphosphate pyrophosphatase OS=Homo sapiens OX=9606 GN=ITPA PE=1 SV=2	2	2.08841e-05	6.15394e-08	5.9819e-11	4	339.361	8.40668
ITPR3	Q14573	sp|Q14573|ITPR3_HUMAN Inositol 1,4,5-trisphosphate receptor type 3 OS=Homo sapiens OX=9606 GN=ITPR3 PE=1 SV=2	51	4.88289e-05	6.07091e-05	0.320481	1	0.80431	-0.314176
ITPRID2	P28290	sp|P28290|ITPI2_HUMAN Protein ITPRID2 OS=Homo sapiens OX=9606 GN=ITPRID2 PE=1 SV=3	5	6.72268e-07	1.25662e-06	0.13526	1	0.53498	-0.902443
IVD	P26440	sp|P26440|IVD_HUMAN Isovaleryl-CoA dehydrogenase, mitochondrial OS=Homo sapiens OX=9606 GN=IVD PE=1 SV=2	8	1.0442e-05	9.98286e-06	0.477328	1	1.046	0.064877
IWS1	Q96ST2	sp|Q96ST2|IWS1_HUMAN Protein IWS1 homolog OS=Homo sapiens OX=9606 GN=IWS1 PE=1 SV=2	4	4.95251e-06	2.8417e-06	0.297601	1	1.7428	0.801404
JAGN1	Q8N5M9	sp|Q8N5M9|JAGN1_HUMAN Protein jagunal homolog 1 OS=Homo sapiens OX=9606 GN=JAGN1 PE=1 SV=1	1	5.08179e-05	5.97865e-05	0.351876	1	0.84999	-0.234482
JAK1	P23458	sp|P23458|JAK1_HUMAN Tyrosine-protein kinase JAK1 OS=Homo sapiens OX=9606 GN=JAK1 PE=1 SV=2	6	3.57018e-06	6.40306e-07	0.0332712	2	5.57574	2.47916
JMJD6	Q6NYC1	sp|Q6NYC1|JMJD6_HUMAN Bifunctional arginine demethylase and lysyl-hydroxylase JMJD6 OS=Homo sapiens OX=9606 GN=JMJD6 PE=1 SV=1	2	1.10387e-05	3.52445e-06	0.117352	1	3.13204	1.6471
JPT1	Q9UK76	sp|Q9UK76|JUPI1_HUMAN Jupiter microtubule associated homolog 1 OS=Homo sapiens OX=9606 GN=JPT1 PE=1 SV=3	6	0.000246631	0.000154633	0.332889	1	1.59494	0.673506
JPT2	Q9H910	sp|Q9H910|JUPI2_HUMAN Jupiter microtubule associated homolog 2 OS=Homo sapiens OX=9606 GN=JPT2 PE=1 SV=1	7	9.93485e-05	5.57269e-05	0.288855	1	1.78277	0.834124
JUN	P05412	sp|P05412|JUN_HUMAN Transcription factor AP-1 OS=Homo sapiens OX=9606 GN=JUN PE=1 SV=2	1	4.73372e-06	6.15394e-08	8.93249e-07	4	76.9217	6.26532
JUP	P14923	sp|P14923|PLAK_HUMAN Junction plakoglobin OS=Homo sapiens OX=9606 GN=JUP PE=1 SV=3	2	3.31659e-08	6.15394e-08	0.137773	1	0.538937	-0.891812
KANK2	Q63ZY3	sp|Q63ZY3|KANK2_HUMAN KN motif and ankyrin repeat domain-containing protein 2 OS=Homo sapiens OX=9606 GN=KANK2 PE=1 SV=1	6	3.7293e-06	2.23277e-06	0.314312	1	1.67026	0.740072
KARS	Q15046	sp|Q15046|SYK_HUMAN Lysine--tRNA ligase OS=Homo sapiens OX=9606 GN=KARS PE=1 SV=3	17	0.000127293	0.000128799	0.442246	1	0.988308	-0.016967
KAT7	O95251	sp|O95251|KAT7_HUMAN Histone acetyltransferase KAT7 OS=Homo sapiens OX=9606 GN=KAT7 PE=1 SV=1	1	1.80001e-06	2.12205e-06	0.350684	1	0.84824	-0.237456
KATNAL2	Q8IYT4	sp|Q8IYT4|KATL2_HUMAN Katanin p60 ATPase-containing subunit A-like 2 OS=Homo sapiens OX=9606 GN=KATNAL2 PE=1 SV=3	1	5.44975e-05	6.20008e-05	0.37146	1	0.87898	-0.186097
KCMF1	Q9P0J7	sp|Q9P0J7|KCMF1_HUMAN E3 ubiquitin-protein ligase KCMF1 OS=Homo sapiens OX=9606 GN=KCMF1 PE=1 SV=2	1	1.46188e-05	1.48913e-05	0.438126	1	0.981707	-0.0266362
KCTD12	Q96CX2	sp|Q96CX2|KCD12_HUMAN BTB/POZ domain-containing protein KCTD12 OS=Homo sapiens OX=9606 GN=KCTD12 PE=1 SV=1	7	3.54035e-05	4.72387e-05	0.282158	1	0.749459	-0.416078
KCTD5	Q9NXV2	sp|Q9NXV2|KCTD5_HUMAN BTB/POZ domain-containing protein KCTD5 OS=Homo sapiens OX=9606 GN=KCTD5 PE=1 SV=1	1	3.92819e-06	6.15394e-08	2.47237e-06	4	63.8321	5.99621
KDELR1	P24390	sp|P24390|ERD21_HUMAN ER lumen protein-retaining receptor 1 OS=Homo sapiens OX=9606 GN=KDELR1 PE=1 SV=1	2	0.00031525	0.000260182	0.450702	1	1.21165	0.276976
KDELR2	P33947	sp|P33947|ERD22_HUMAN ER lumen protein-retaining receptor 2 OS=Homo sapiens OX=9606 GN=KDELR2 PE=1 SV=1	1	3.31659e-08	9.96441e-05	9.58327e-37	4	0.000332843	-11.5529
KDM1A	O60341	sp|O60341|KDM1A_HUMAN Lysine-specific histone demethylase 1A OS=Homo sapiens OX=9606 GN=KDM1A PE=1 SV=2	8	6.27516e-06	4.35482e-06	0.375181	1	1.44097	0.527041
KDM3B	Q7LBC6	sp|Q7LBC6|KDM3B_HUMAN Lysine-specific demethylase 3B OS=Homo sapiens OX=9606 GN=KDM3B PE=1 SV=2	2	6.09616e-07	8.00843e-07	0.290413	1	0.761217	-0.39362
KDSR	Q06136	sp|Q06136|KDSR_HUMAN 3-ketodihydrosphingosine reductase OS=Homo sapiens OX=9606 GN=KDSR PE=1 SV=1	4	3.67957e-05	2.21431e-05	0.316354	1	1.66172	0.732679
KEAP1	Q14145	sp|Q14145|KEAP1_HUMAN Kelch-like ECH-associated protein 1 OS=Homo sapiens OX=9606 GN=KEAP1 PE=1 SV=2	1	3.31659e-08	6.15394e-08	0.137773	1	0.538937	-0.891812
KHDRBS1	Q07666	sp|Q07666|KHDR1_HUMAN KH domain-containing, RNA-binding, signal transduction-associated protein 1 OS=Homo sapiens OX=9606 GN=KHDRBS1 PE=1 SV=1	6	0.000530057	0.000612627	0.362201	1	0.865221	-0.20886
KHSRP	Q92945	sp|Q92945|FUBP2_HUMAN Far upstream element-binding protein 2 OS=Homo sapiens OX=9606 GN=KHSRP PE=1 SV=4	27	0.000305305	0.000241729	0.432343	1	1.263	0.33686
KIAA1217	Q5T5P2	sp|Q5T5P2|SKT_HUMAN Sickle tail protein homolog OS=Homo sapiens OX=9606 GN=KIAA1217 PE=1 SV=2	1	3.31659e-08	3.70897e-07	5.0135e-05	4	0.0894206	-3.48325
KIAA2013	Q8IYS2	sp|Q8IYS2|K2013_HUMAN Uncharacterized protein KIAA2013 OS=Homo sapiens OX=9606 GN=KIAA2013 PE=1 SV=1	3	6.46411e-06	2.60182e-06	0.176518	1	2.48446	1.31293
KIF11	P52732	sp|P52732|KIF11_HUMAN Kinesin-like protein KIF11 OS=Homo sapiens OX=9606 GN=KIF11 PE=1 SV=2	11	4.00775e-06	3.45064e-06	0.469526	1	1.16145	0.21593
KIF14	Q15058	sp|Q15058|KIF14_HUMAN Kinesin-like protein KIF14 OS=Homo sapiens OX=9606 GN=KIF14 PE=1 SV=1	2	5.34035e-07	3.91195e-07	0.39837	1	1.36514	0.449046
KIF1B	O60333	sp|O60333|KIF1B_HUMAN Kinesin-like protein KIF1B OS=Homo sapiens OX=9606 GN=KIF1B PE=1 SV=5	2	8.105e-07	6.15394e-08	0.00256982	3	13.1704	3.71923
KIF1BP	Q96EK5	sp|Q96EK5|KBP_HUMAN KIF1-binding protein OS=Homo sapiens OX=9606 GN=KIF1BP PE=1 SV=1	8	1.84973e-05	1.77883e-05	0.473676	1	1.03986	0.0563857
KIF20A	O95235	sp|O95235|KI20A_HUMAN Kinesin-like protein KIF20A OS=Homo sapiens OX=9606 GN=KIF20A PE=1 SV=1	3	3.68952e-06	5.6465e-07	0.0220818	2	6.53417	2.708
KIF23	Q02241	sp|Q02241|KIF23_HUMAN Kinesin-like protein KIF23 OS=Homo sapiens OX=9606 GN=KIF23 PE=1 SV=3	7	1.21326e-05	6.60603e-06	0.277571	1	1.8366	0.877038
KIF2A	O00139	sp|O00139|KIF2A_HUMAN Kinesin-like protein KIF2A OS=Homo sapiens OX=9606 GN=KIF2A PE=1 SV=3	8	1.17349e-05	1.33597e-05	0.371055	1	0.878378	-0.187087
KIF2C	Q99661	sp|Q99661|KIF2C_HUMAN Kinesin-like protein KIF2C OS=Homo sapiens OX=9606 GN=KIF2C PE=1 SV=2	3	4.47516e-06	6.15394e-08	1.2191e-06	4	72.7201	6.18428
KIF3B	O15066	sp|O15066|KIF3B_HUMAN Kinesin-like protein KIF3B OS=Homo sapiens OX=9606 GN=KIF3B PE=1 SV=1	2	2.26741e-05	6.15394e-08	3.24561e-11	4	368.449	8.52532
KIF4A	O95239	sp|O95239|KIF4A_HUMAN Chromosome-associated kinesin KIF4A OS=Homo sapiens OX=9606 GN=KIF4A PE=1 SV=3	11	3.34145e-06	6.3477e-06	0.12986	1	0.526403	-0.925759
KIF5B	P33176	sp|P33176|KINH_HUMAN Kinesin-1 heavy chain OS=Homo sapiens OX=9606 GN=KIF5B PE=1 SV=1	36	9.09948e-05	4.55779e-05	0.247108	1	1.99647	0.997449
KIFC1	Q9BW19	sp|Q9BW19|KIFC1_HUMAN Kinesin-like protein KIFC1 OS=Homo sapiens OX=9606 GN=KIFC1 PE=1 SV=2	8	7.97572e-06	6.47687e-06	0.443531	1	1.23142	0.300319
KIN	O60870	sp|O60870|KIN17_HUMAN DNA/RNA-binding protein KIN17 OS=Homo sapiens OX=9606 GN=KIN PE=1 SV=2	2	8.5028e-07	6.15394e-08	0.00217327	3	13.8168	3.78835
KIRREL1	Q96J84	sp|Q96J84|KIRR1_HUMAN Kin of IRRE-like protein 1 OS=Homo sapiens OX=9606 GN=KIRREL1 PE=1 SV=2	2	2.00885e-06	1.31383e-06	0.350257	1	1.52901	0.612594
KLC1	Q07866	sp|Q07866|KLC1_HUMAN Kinesin light chain 1 OS=Homo sapiens OX=9606 GN=KLC1 PE=1 SV=2	7	1.5315e-05	1.67734e-05	0.394072	1	0.91305	-0.131234
KLC2	Q9H0B6	sp|Q9H0B6|KLC2_HUMAN Kinesin light chain 2 OS=Homo sapiens OX=9606 GN=KLC2 PE=1 SV=1	8	2.81438e-05	1.90062e-05	0.363658	1	1.48077	0.566346
KNTC1	P50748	sp|P50748|KNTC1_HUMAN Kinetochore-associated protein 1 OS=Homo sapiens OX=9606 GN=KNTC1 PE=1 SV=1	2	5.40002e-07	6.15394e-08	0.00956448	3	8.77489	3.13338
KPNA1	P52294	sp|P52294|IMA5_HUMAN Importin subunit alpha-5 OS=Homo sapiens OX=9606 GN=KPNA1 PE=1 SV=3	4	1.9094e-05	1.48359e-05	0.42406	1	1.28701	0.364027
KPNA2	P52292	sp|P52292|IMA1_HUMAN Importin subunit alpha-1 OS=Homo sapiens OX=9606 GN=KPNA2 PE=1 SV=1	11	0.000149172	0.000138948	0.493501	1	1.07358	0.102429
KPNA3	O00505	sp|O00505|IMA4_HUMAN Importin subunit alpha-4 OS=Homo sapiens OX=9606 GN=KPNA3 PE=1 SV=2	7	6.83207e-05	3.83814e-05	0.289442	1	1.78005	0.831915
KPNA4	O00629	sp|O00629|IMA3_HUMAN Importin subunit alpha-3 OS=Homo sapiens OX=9606 GN=KPNA4 PE=1 SV=1	10	0.000117349	0.000111269	0.482437	1	1.05464	0.0767451
KPNA6	O60684	sp|O60684|IMA7_HUMAN Importin subunit alpha-7 OS=Homo sapiens OX=9606 GN=KPNA6 PE=1 SV=1;sp|O15131|IMA6_HUMAN Importin subunit alpha-6 OS=Homo sapiens OX=9606 GN=KPNA5 PE=1 SV=2	5	7.08069e-05	7.21497e-05	0.437927	1	0.981389	-0.0271032
KPNB1	Q14974	sp|Q14974|IMB1_HUMAN Importin subunit beta-1 OS=Homo sapiens OX=9606 GN=KPNB1 PE=1 SV=2	31	0.000644422	0.000588638	0.495935	1	1.09477	0.130626
KRI1	Q8N9T8	sp|Q8N9T8|KRI1_HUMAN Protein KRI1 homolog OS=Homo sapiens OX=9606 GN=KRI1 PE=1 SV=3	8	3.07294e-05	1.2843e-05	0.187665	1	2.39269	1.25864
KRR1	Q13601	sp|Q13601|KRR1_HUMAN KRR1 small subunit processome component homolog OS=Homo sapiens OX=9606 GN=KRR1 PE=1 SV=4	4	3.26189e-05	1.79544e-05	0.281666	1	1.81677	0.861372
KRT18	P05783	sp|P05783|K1C18_HUMAN Keratin, type I cytoskeletal 18 OS=Homo sapiens OX=9606 GN=KRT18 PE=1 SV=2	18	0.00370941	0.0046316	0.318108	1	0.80089	-0.320324
KRTCAP2	Q8N6L1	sp|Q8N6L1|KTAP2_HUMAN Keratinocyte-associated protein 2 OS=Homo sapiens OX=9606 GN=KRTCAP2 PE=1 SV=2	1	9.73595e-05	0.000110531	0.372701	1	0.880833	-0.183059
KTN1	Q86UP2	sp|Q86UP2|KTN1_HUMAN Kinectin OS=Homo sapiens OX=9606 GN=KTN1 PE=1 SV=1	61	0.000126299	9.20785e-05	0.396315	1	1.37164	0.455905
KYAT3	Q6YP21	sp|Q6YP21|KAT3_HUMAN Kynurenine--oxoglutarate transaminase 3 OS=Homo sapiens OX=9606 GN=KYAT3 PE=1 SV=1	6	5.3503e-06	4.70542e-06	0.479	1	1.13705	0.185297
L1CAM	P32004	sp|P32004|L1CAM_HUMAN Neural cell adhesion molecule L1 OS=Homo sapiens OX=9606 GN=L1CAM PE=1 SV=2	8	1.03426e-05	7.98998e-06	0.421534	1	1.29444	0.372333
LACC1	Q8IV20	sp|Q8IV20|LACC1_HUMAN Laccase domain-containing protein 1 OS=Homo sapiens OX=9606 GN=LACC1 PE=1 SV=1	1	1.56133e-06	2.25122e-06	0.242816	1	0.69355	-0.527928
LACTB	P83111	sp|P83111|LACTB_HUMAN Serine beta-lactamase-like protein LACTB, mitochondrial OS=Homo sapiens OX=9606 GN=LACTB PE=1 SV=2	18	0.000102431	0.000111454	0.398004	1	0.919048	-0.121788
LACTB2	Q53H82	sp|Q53H82|LACB2_HUMAN Endoribonuclease LACTB2 OS=Homo sapiens OX=9606 GN=LACTB2 PE=1 SV=2	5	8.57241e-06	7.56557e-06	0.480562	1	1.13308	0.180252
LAMA5	O15230	sp|O15230|LAMA5_HUMAN Laminin subunit alpha-5 OS=Homo sapiens OX=9606 GN=LAMA5 PE=1 SV=8	3	3.31659e-08	6.15394e-08	0.137773	1	0.538937	-0.891812
LAMB1	P07942	sp|P07942|LAMB1_HUMAN Laminin subunit beta-1 OS=Homo sapiens OX=9606 GN=LAMB1 PE=1 SV=2	10	7.09064e-06	6.55068e-06	0.498604	1	1.08243	0.114271
LAMB3	Q13751	sp|Q13751|LAMB3_HUMAN Laminin subunit beta-3 OS=Homo sapiens OX=9606 GN=LAMB3 PE=1 SV=1	3	4.82322e-07	5.03756e-07	0.422809	1	0.957452	-0.062728
LAMC1	P11047	sp|P11047|LAMC1_HUMAN Laminin subunit gamma-1 OS=Homo sapiens OX=9606 GN=LAMC1 PE=1 SV=3	14	9.70612e-06	7.63938e-06	0.429724	1	1.27054	0.345439
LAMP1	P11279	sp|P11279|LAMP1_HUMAN Lysosome-associated membrane glycoprotein 1 OS=Homo sapiens OX=9606 GN=LAMP1 PE=1 SV=3	6	0.000105415	6.77211e-05	0.342858	1	1.5566	0.6384
LAMP2	P13473	sp|P13473|LAMP2_HUMAN Lysosome-associated membrane glycoprotein 2 OS=Homo sapiens OX=9606 GN=LAMP2 PE=1 SV=2	4	0.000251603	0.000306313	0.332289	1	0.821392	-0.283858
LAMTOR1	Q6IAA8	sp|Q6IAA8|LTOR1_HUMAN Ragulator complex protein LAMTOR1 OS=Homo sapiens OX=9606 GN=LAMTOR1 PE=1 SV=2	5	7.77683e-05	8.26677e-05	0.412091	1	0.940734	-0.0881419
LAMTOR2	Q9Y2Q5	sp|Q9Y2Q5|LTOR2_HUMAN Ragulator complex protein LAMTOR2 OS=Homo sapiens OX=9606 GN=LAMTOR2 PE=1 SV=1	1	3.31659e-08	1.36365e-05	9.72908e-22	4	0.00243214	-8.68356
LAMTOR3	Q9UHA4	sp|Q9UHA4|LTOR3_HUMAN Ragulator complex protein LAMTOR3 OS=Homo sapiens OX=9606 GN=LAMTOR3 PE=1 SV=1	2	1.75028e-05	1.63306e-05	0.49246	1	1.07178	0.100014
LAMTOR4	Q0VGL1	sp|Q0VGL1|LTOR4_HUMAN Ragulator complex protein LAMTOR4 OS=Homo sapiens OX=9606 GN=LAMTOR4 PE=1 SV=1	2	2.78454e-05	4.83458e-05	0.161865	1	0.575963	-0.795952
LAMTOR5	O43504	sp|O43504|LTOR5_HUMAN Ragulator complex protein LAMTOR5 OS=Homo sapiens OX=9606 GN=LAMTOR5 PE=1 SV=1	2	9.89507e-05	9.20785e-05	0.494111	1	1.07463	0.103845
LANCL1	O43813	sp|O43813|LANC1_HUMAN Glutathione S-transferase LANCL1 OS=Homo sapiens OX=9606 GN=LANCL1 PE=1 SV=1	2	3.31659e-08	8.28522e-06	1.25889e-18	4	0.00400302	-7.9647
LANCL2	Q9NS86	sp|Q9NS86|LANC2_HUMAN LanC-like protein 2 OS=Homo sapiens OX=9606 GN=LANCL2 PE=1 SV=1	4	6.0166e-06	9.06023e-06	0.222142	1	0.664067	-0.5906
LAP3	P28838	sp|P28838|AMPL_HUMAN Cytosol aminopeptidase OS=Homo sapiens OX=9606 GN=LAP3 PE=1 SV=3	20	0.000107404	0.000149835	0.259187	1	0.716813	-0.480332
LARP1	Q6PKG0	sp|Q6PKG0|LARP1_HUMAN La-related protein 1 OS=Homo sapiens OX=9606 GN=LARP1 PE=1 SV=2	17	2.38675e-05	2.23277e-05	0.490823	1	1.06897	0.0962155
LARP4	Q71RC2	sp|Q71RC2|LARP4_HUMAN La-related protein 4 OS=Homo sapiens OX=9606 GN=LARP4 PE=1 SV=3	4	3.01327e-06	3.00778e-06	0.450617	1	1.00183	0.00263401
LARP4B	Q92615	sp|Q92615|LAR4B_HUMAN La-related protein 4B OS=Homo sapiens OX=9606 GN=LARP4B PE=1 SV=3	6	1.5315e-05	6.53222e-06	0.193866	1	2.34453	1.2293
LARP7	Q4G0J3	sp|Q4G0J3|LARP7_HUMAN La-related protein 7 OS=Homo sapiens OX=9606 GN=LARP7 PE=1 SV=1	4	5.51936e-06	1.45222e-06	0.0799825	1	3.80063	1.92624
LARS	Q9P2J5	sp|Q9P2J5|SYLC_HUMAN Leucine--tRNA ligase, cytoplasmic OS=Homo sapiens OX=9606 GN=LARS PE=1 SV=2	32	9.82545e-05	8.41439e-05	0.467136	1	1.1677	0.223665
LARS2	Q15031	sp|Q15031|SYLM_HUMAN Probable leucine--tRNA ligase, mitochondrial OS=Homo sapiens OX=9606 GN=LARS2 PE=1 SV=2	11	9.64645e-06	2.25122e-05	0.0738401	1	0.428499	-1.22264
LAS1L	Q9Y4W2	sp|Q9Y4W2|LAS1L_HUMAN Ribosomal biogenesis protein LAS1L OS=Homo sapiens OX=9606 GN=LAS1L PE=1 SV=2	7	3.87847e-06	8.78344e-06	0.0806135	1	0.441566	-1.1793
LASP1	Q14847	sp|Q14847|LASP1_HUMAN LIM and SH3 domain protein 1 OS=Homo sapiens OX=9606 GN=LASP1 PE=1 SV=2	14	0.000804534	0.00042441	0.265808	1	1.89565	0.922694
LBR	Q14739	sp|Q14739|LBR_HUMAN Delta(14)-sterol reductase LBR OS=Homo sapiens OX=9606 GN=LBR PE=1 SV=2	10	0.000103426	9.37393e-05	0.49245	1	1.10334	0.141871
LCLAT1	Q6UWP7	sp|Q6UWP7|LCLT1_HUMAN Lysocardiolipin acyltransferase 1 OS=Homo sapiens OX=9606 GN=LCLAT1 PE=1 SV=1	3	1.40222e-05	1.47805e-05	0.417208	1	0.94869	-0.0759908
LDAH	Q9H6V9	sp|Q9H6V9|LDAH_HUMAN Lipid droplet-associated hydrolase OS=Homo sapiens OX=9606 GN=LDAH PE=1 SV=1	2	3.67957e-06	6.15394e-08	3.49757e-06	4	59.7921	5.90188
LDHA	P00338	sp|P00338|LDHA_HUMAN L-lactate dehydrogenase A chain OS=Homo sapiens OX=9606 GN=LDHA PE=1 SV=2	21	0.00714036	0.00566495	0.433238	1	1.26045	0.333933
LDHB	P07195	sp|P07195|LDHB_HUMAN L-lactate dehydrogenase B chain OS=Homo sapiens OX=9606 GN=LDHB PE=1 SV=2	13	0.00126299	0.00108686	0.469295	1	1.16205	0.216677
LDLR	P01130	sp|P01130|LDLR_HUMAN Low-density lipoprotein receptor OS=Homo sapiens OX=9606 GN=LDLR PE=1 SV=1	9	1.46188e-05	2.15896e-05	0.231283	1	0.677126	-0.562504
LEMD2	Q8NC56	sp|Q8NC56|LEMD2_HUMAN LEM domain-containing protein 2 OS=Homo sapiens OX=9606 GN=LEMD2 PE=1 SV=1	11	4.02764e-05	2.34348e-05	0.303039	1	1.71866	0.781282
LEMD3	Q9Y2U8	sp|Q9Y2U8|MAN1_HUMAN Inner nuclear membrane protein Man1 OS=Homo sapiens OX=9606 GN=LEMD3 PE=1 SV=2	6	2.39669e-06	2.17741e-06	0.493515	1	1.10071	0.138434
LENG8	Q96PV6	sp|Q96PV6|LENG8_HUMAN Leukocyte receptor cluster member 8 OS=Homo sapiens OX=9606 GN=LENG8 PE=1 SV=3	2	1.97901e-06	1.20126e-06	0.319804	1	1.64744	0.720227
LEPROT	O15243	sp|O15243|OBRG_HUMAN Leptin receptor gene-related protein OS=Homo sapiens OX=9606 GN=LEPROT PE=1 SV=1	1	1.83979e-05	6.15394e-08	1.51022e-10	4	298.96	8.22381
LETM1	O95202	sp|O95202|LETM1_HUMAN Mitochondrial proton/calcium exchanger protein OS=Homo sapiens OX=9606 GN=LETM1 PE=1 SV=1	22	0.000113371	0.00012068	0.411251	1	0.939431	-0.0901405
LGALS1	P09382	sp|P09382|LEG1_HUMAN Galectin-1 OS=Homo sapiens OX=9606 GN=LGALS1 PE=1 SV=2	11	0.0100442	0.00780545	0.424125	1	1.28682	0.363814
LGALS3	P17931	sp|P17931|LEG3_HUMAN Galectin-3 OS=Homo sapiens OX=9606 GN=LGALS3 PE=1 SV=5	10	0.00059271	0.000675365	0.370543	1	0.877613	-0.188343
LGALS3BP	Q08380	sp|Q08380|LG3BP_HUMAN Galectin-3-binding protein OS=Homo sapiens OX=9606 GN=LGALS3BP PE=1 SV=1	11	4.21659e-05	4.39172e-05	0.424509	1	0.960123	-0.0587091
LGALS8	O00214	sp|O00214|LEG8_HUMAN Galectin-8 OS=Homo sapiens OX=9606 GN=LGALS8 PE=1 SV=4	3	5.05195e-06	2.58337e-06	0.254492	1	1.95557	0.96759
LIG1	P18858	sp|P18858|DNLI1_HUMAN DNA ligase 1 OS=Homo sapiens OX=9606 GN=LIG1 PE=1 SV=1	2	9.38788e-07	6.15394e-08	0.00152407	3	15.2551	3.93122
LIG3	P49916	sp|P49916|DNLI3_HUMAN DNA ligase 3 OS=Homo sapiens OX=9606 GN=LIG3 PE=1 SV=2	8	3.57018e-06	3.52445e-06	0.457452	1	1.01298	0.0185994
LIMA1	Q9UHB6	sp|Q9UHB6|LIMA1_HUMAN LIM domain and actin-binding protein 1 OS=Homo sapiens OX=9606 GN=LIMA1 PE=1 SV=1	16	4.0177e-05	2.74944e-05	0.369248	1	1.46128	0.547231
LIMCH1	Q9UPQ0	sp|Q9UPQ0|LIMC1_HUMAN LIM and calponin homology domains-containing protein 1 OS=Homo sapiens OX=9606 GN=LIMCH1 PE=1 SV=4	5	2.36686e-06	2.4542e-06	0.427233	1	0.964413	-0.0522765
LIMD1	Q9UGP4	sp|Q9UGP4|LIMD1_HUMAN LIM domain-containing protein 1 OS=Homo sapiens OX=9606 GN=LIMD1 PE=1 SV=1	1	3.31659e-08	6.15394e-08	0.137773	1	0.538937	-0.891812
LIMS1	P48059	sp|P48059|LIMS1_HUMAN LIM and senescent cell antigen-like-containing domain protein 1 OS=Homo sapiens OX=9606 GN=LIMS1 PE=1 SV=4	5	2.98344e-06	6.15394e-08	1.02774e-05	4	48.4801	5.59932
LIN7C	Q9NUP9	sp|Q9NUP9|LIN7C_HUMAN Protein lin-7 homolog C OS=Homo sapiens OX=9606 GN=LIN7C PE=1 SV=1;sp|O14910|LIN7A_HUMAN Protein lin-7 homolog A OS=Homo sapiens OX=9606 GN=LIN7A PE=1 SV=2	5	6.15583e-05	1.56847e-05	0.0747641	1	3.92473	1.97259
LIPA	P38571	sp|P38571|LICH_HUMAN Lysosomal acid lipase/cholesteryl ester hydrolase OS=Homo sapiens OX=9606 GN=LIPA PE=1 SV=2	2	7.75694e-06	1.39502e-05	0.148782	1	0.556046	-0.846724
LLGL1	Q15334	sp|Q15334|L2GL1_HUMAN Lethal(2) giant larvae protein homolog 1 OS=Homo sapiens OX=9606 GN=LLGL1 PE=1 SV=3	5	3.60001e-06	1.24186e-06	0.135312	1	2.89889	1.5355
LLPH	Q9BRT6	sp|Q9BRT6|LLPH_HUMAN Protein LLP homolog OS=Homo sapiens OX=9606 GN=LLPH PE=1 SV=1	2	3.31659e-08	5.25899e-05	1.79933e-31	4	0.000630651	-10.6309
LMAN1	P49257	sp|P49257|LMAN1_HUMAN Protein ERGIC-53 OS=Homo sapiens OX=9606 GN=LMAN1 PE=1 SV=2	14	0.000323206	0.000357981	0.387356	1	0.902858	-0.147429
LMAN2	Q12907	sp|Q12907|LMAN2_HUMAN Vesicular integral-membrane protein VIP36 OS=Homo sapiens OX=9606 GN=LMAN2 PE=1 SV=1	13	0.000280443	0.000287861	0.433435	1	0.974232	-0.0376627
LMAN2L	Q9H0V9	sp|Q9H0V9|LMA2L_HUMAN VIP36-like protein OS=Homo sapiens OX=9606 GN=LMAN2L PE=1 SV=1	5	2.21769e-05	3.48754e-05	0.202547	1	0.635888	-0.653154
LMBRD1	Q9NUN5	sp|Q9NUN5|LMBD1_HUMAN Probable lysosomal cobalamin transporter OS=Homo sapiens OX=9606 GN=LMBRD1 PE=1 SV=1	1	3.51051e-06	6.15394e-08	4.47462e-06	4	57.0449	5.83403
LMBRD2	Q68DH5	sp|Q68DH5|LMBD2_HUMAN LMBR1 domain-containing protein 2 OS=Homo sapiens OX=9606 GN=LMBRD2 PE=1 SV=1	1	3.31659e-08	1.68103e-06	2.11507e-10	4	0.0197295	-5.6635
LMF2	Q9BU23	sp|Q9BU23|LMF2_HUMAN Lipase maturation factor 2 OS=Homo sapiens OX=9606 GN=LMF2 PE=1 SV=2	10	2.81438e-05	5.07447e-05	0.147852	1	0.554615	-0.850441
LMNA	P02545	sp|P02545|LMNA_HUMAN Prelamin-A/C OS=Homo sapiens OX=9606 GN=LMNA PE=1 SV=1	52	0.00446521	0.00470542	0.417376	1	0.948952	-0.0755936
LMNB1	P20700	sp|P20700|LMNB1_HUMAN Lamin-B1 OS=Homo sapiens OX=9606 GN=LMNB1 PE=1 SV=2	33	0.000493262	0.000557269	0.375582	1	0.885141	-0.17602
LMNB2	Q03252	sp|Q03252|LMNB2_HUMAN Lamin-B2 OS=Homo sapiens OX=9606 GN=LMNB2 PE=1 SV=4	27	0.00026652	0.000398576	0.225369	1	0.668681	-0.58061
LMO7	Q8WWI1	sp|Q8WWI1|LMO7_HUMAN LIM domain only protein 7 OS=Homo sapiens OX=9606 GN=LMO7 PE=1 SV=3	13	5.08179e-06	1.69579e-06	0.127389	1	2.9967	1.58337
LNPEP	Q9UIQ6	sp|Q9UIQ6|LCAP_HUMAN Leucyl-cystinyl aminopeptidase OS=Homo sapiens OX=9606 GN=LNPEP PE=1 SV=3	15	2.30719e-05	3.80124e-05	0.182699	1	0.606958	-0.720331
LNPK	Q9C0E8	sp|Q9C0E8|LNP_HUMAN Endoplasmic reticulum junction formation protein lunapark OS=Homo sapiens OX=9606 GN=LNPK PE=1 SV=2	9	2.59559e-05	3.35837e-05	0.298576	1	0.772871	-0.3717
LONP1	P36776	sp|P36776|LONM_HUMAN Lon protease homolog, mitochondrial OS=Homo sapiens OX=9606 GN=LONP1 PE=1 SV=2	27	0.000159117	0.00016755	0.417835	1	0.949668	-0.0745041
LPCAT1	Q8NF37	sp|Q8NF37|PCAT1_HUMAN Lysophosphatidylcholine acyltransferase 1 OS=Homo sapiens OX=9606 GN=LPCAT1 PE=1 SV=2	10	7.07075e-05	5.11137e-05	0.392653	1	1.38334	0.468152
LPCAT2	Q7L5N7	sp|Q7L5N7|PCAT2_HUMAN Lysophosphatidylcholine acyltransferase 2 OS=Homo sapiens OX=9606 GN=LPCAT2 PE=1 SV=1	5	4.46521e-06	4.00422e-06	0.487698	1	1.11513	0.157209
LPCAT3	Q6P1A2	sp|Q6P1A2|MBOA5_HUMAN Lysophospholipid acyltransferase 5 OS=Homo sapiens OX=9606 GN=LPCAT3 PE=1 SV=1	4	1.00442e-05	2.25122e-05	0.0830578	1	0.446169	-1.16434
LPCAT4	Q643R3	sp|Q643R3|LPCT4_HUMAN Lysophospholipid acyltransferase LPCAT4 OS=Homo sapiens OX=9606 GN=LPCAT4 PE=1 SV=1	4	1.63095e-06	1.49097e-06	0.496297	1	1.09388	0.129457
LPGAT1	Q92604	sp|Q92604|LGAT1_HUMAN Acyl-CoA:lysophosphatidylglycerol acyltransferase 1 OS=Homo sapiens OX=9606 GN=LPGAT1 PE=1 SV=1	2	3.31659e-08	6.15394e-08	0.137773	1	0.538937	-0.891812
LPP	Q93052	sp|Q93052|LPP_HUMAN Lipoma-preferred partner OS=Homo sapiens OX=9606 GN=LPP PE=1 SV=1	11	4.65416e-05	2.58337e-05	0.284848	1	1.80159	0.84927
LRBA	P50851	sp|P50851|LRBA_HUMAN Lipopolysaccharide-responsive and beige-like anchor protein OS=Homo sapiens OX=9606 GN=LRBA PE=1 SV=4	2	2.84421e-07	2.58337e-07	0.493409	1	1.10097	0.138776
LRPAP1	P30533	sp|P30533|AMRP_HUMAN Alpha-2-macroglobulin receptor-associated protein OS=Homo sapiens OX=9606 GN=LRPAP1 PE=1 SV=1	10	2.79449e-05	5.75721e-05	0.105015	1	0.485389	-1.04279
LRPPRC	P42704	sp|P42704|LPPRC_HUMAN Leucine-rich PPR motif-containing protein, mitochondrial OS=Homo sapiens OX=9606 GN=LRPPRC PE=1 SV=3	80	0.00045746	0.000573876	0.315504	1	0.797141	-0.327093
LRRC40	Q9H9A6	sp|Q9H9A6|LRC40_HUMAN Leucine-rich repeat-containing protein 40 OS=Homo sapiens OX=9606 GN=LRRC40 PE=1 SV=1	3	1.55139e-06	1.73455e-06	0.381755	1	0.894406	-0.160998
LRRC47	Q8N1G4	sp|Q8N1G4|LRC47_HUMAN Leucine-rich repeat-containing protein 47 OS=Homo sapiens OX=9606 GN=LRRC47 PE=1 SV=1	15	4.98234e-05	2.4911e-05	0.246473	1	2.00005	1.00004
LRRC57	Q8N9N7	sp|Q8N9N7|LRC57_HUMAN Leucine-rich repeat-containing protein 57 OS=Homo sapiens OX=9606 GN=LRRC57 PE=1 SV=1	2	4.16687e-06	6.15394e-08	1.80002e-06	4	67.7105	6.08131
LRRC59	Q96AG4	sp|Q96AG4|LRC59_HUMAN Leucine-rich repeat-containing protein 59 OS=Homo sapiens OX=9606 GN=LRRC59 PE=1 SV=1	12	0.000838346	0.000806379	0.473547	1	1.03964	0.0560875
LRRC8A	Q8IWT6	sp|Q8IWT6|LRC8A_HUMAN Volume-regulated anion channel subunit LRRC8A OS=Homo sapiens OX=9606 GN=LRRC8A PE=1 SV=1	8	7.46854e-06	6.12627e-06	0.447984	1	1.2191	0.285818
LRRC8C	Q8TDW0	sp|Q8TDW0|LRC8C_HUMAN Volume-regulated anion channel subunit LRRC8C OS=Homo sapiens OX=9606 GN=LRRC8C PE=1 SV=2	1	7.5481e-07	6.15394e-08	0.0032803	3	12.2655	3.61653
LRRFIP1	Q32MZ4	sp|Q32MZ4|LRRF1_HUMAN Leucine-rich repeat flightless-interacting protein 1 OS=Homo sapiens OX=9606 GN=LRRFIP1 PE=1 SV=2	15	4.40554e-05	3.57981e-05	0.443801	1	1.23067	0.299438
LRRFIP2	Q9Y608	sp|Q9Y608|LRRF2_HUMAN Leucine-rich repeat flightless-interacting protein 2 OS=Homo sapiens OX=9606 GN=LRRFIP2 PE=1 SV=1	3	1.8199e-06	5.05601e-06	0.0427634	2	0.359947	-1.47414
LRRK1	Q38SD2	sp|Q38SD2|LRRK1_HUMAN Leucine-rich repeat serine/threonine-protein kinase 1 OS=Homo sapiens OX=9606 GN=LRRK1 PE=1 SV=3	1	1.49172e-06	6.15394e-08	0.000248949	4	24.24	4.59932
LRWD1	Q9UFC0	sp|Q9UFC0|LRWD1_HUMAN Leucine-rich repeat and WD repeat-containing protein 1 OS=Homo sapiens OX=9606 GN=LRWD1 PE=1 SV=2	3	3.31659e-08	2.12205e-06	1.94255e-11	4	0.0156292	-5.99962
LSG1	Q9H089	sp|Q9H089|LSG1_HUMAN Large subunit GTPase 1 homolog OS=Homo sapiens OX=9606 GN=LSG1 PE=1 SV=2	4	6.81218e-06	9.70607e-07	0.0181891	2	7.01847	2.81116
LSM12	Q3MHD2	sp|Q3MHD2|LSM12_HUMAN Protein LSM12 homolog OS=Homo sapiens OX=9606 GN=LSM12 PE=1 SV=2	2	3.79891e-05	6.15394e-08	5.78569e-13	4	617.313	9.26986
LSM14A	Q8ND56	sp|Q8ND56|LS14A_HUMAN Protein LSM14 homolog A OS=Homo sapiens OX=9606 GN=LSM14A PE=1 SV=3	3	2.15802e-06	4.96375e-06	0.0770524	1	0.434756	-1.20172
LSM14B	Q9BX40	sp|Q9BX40|LS14B_HUMAN Protein LSM14 homolog B OS=Homo sapiens OX=9606 GN=LSM14B PE=1 SV=1	3	3.31659e-08	5.3328e-06	4.32647e-16	4	0.00621922	-7.32905
LSM2	Q9Y333	sp|Q9Y333|LSM2_HUMAN U6 snRNA-associated Sm-like protein LSm2 OS=Homo sapiens OX=9606 GN=LSM2 PE=1 SV=1	3	0.000213813	0.000113668	0.268663	1	1.88103	0.911523
LSM3	P62310	sp|P62310|LSM3_HUMAN U6 snRNA-associated Sm-like protein LSm3 OS=Homo sapiens OX=9606 GN=LSM3 PE=1 SV=2	2	0.000194918	0.000173085	0.483308	1	1.12614	0.171382
LSM4	Q9Y4Z0	sp|Q9Y4Z0|LSM4_HUMAN U6 snRNA-associated Sm-like protein LSm4 OS=Homo sapiens OX=9606 GN=LSM4 PE=1 SV=1	4	7.73705e-05	6.82747e-05	0.480506	1	1.13322	0.180433
LSM5	Q9Y4Y9	sp|Q9Y4Y9|LSM5_HUMAN U6 snRNA-associated Sm-like protein LSm5 OS=Homo sapiens OX=9606 GN=LSM5 PE=1 SV=3	1	0.000247625	6.15394e-08	1.60801e-20	4	4023.85	11.9744
LSM6	P62312	sp|P62312|LSM6_HUMAN U6 snRNA-associated Sm-like protein LSm6 OS=Homo sapiens OX=9606 GN=LSM6 PE=1 SV=1	3	0.000106409	3.91195e-05	0.15144	1	2.72011	1.44366
LSM7	Q9UK45	sp|Q9UK45|LSM7_HUMAN U6 snRNA-associated Sm-like protein LSm7 OS=Homo sapiens OX=9606 GN=LSM7 PE=1 SV=1	2	3.31659e-08	6.15394e-08	0.137773	1	0.538937	-0.891812
LSM8	O95777	sp|O95777|LSM8_HUMAN U6 snRNA-associated Sm-like protein LSm8 OS=Homo sapiens OX=9606 GN=LSM8 PE=1 SV=3	4	0.000110387	9.44774e-05	0.466868	1	1.1684	0.224532
LSS	P48449	sp|P48449|ERG7_HUMAN Lanosterol synthase OS=Homo sapiens OX=9606 GN=LSS PE=1 SV=1	15	2.81438e-05	2.4911e-05	0.481869	1	1.12977	0.176031
LTA4H	P09960	sp|P09960|LKHA4_HUMAN Leukotriene A-4 hydrolase OS=Homo sapiens OX=9606 GN=LTA4H PE=1 SV=2	14	4.58455e-05	2.19586e-05	0.231547	1	2.08781	1.06199
LTV1	Q96GA3	sp|Q96GA3|LTV1_HUMAN Protein LTV1 homolog OS=Homo sapiens OX=9606 GN=LTV1 PE=1 SV=1	4	1.86962e-06	6.15394e-08	9.38675e-05	4	30.3808	4.92509
LUC7L	Q9NQ29	sp|Q9NQ29|LUC7L_HUMAN Putative RNA-binding protein Luc7-like 1 OS=Homo sapiens OX=9606 GN=LUC7L PE=1 SV=1	6	1.54144e-05	2.08514e-05	0.274981	1	0.73925	-0.435866
LUC7L2	Q9Y383	sp|Q9Y383|LC7L2_HUMAN Putative RNA-binding protein Luc7-like 2 OS=Homo sapiens OX=9606 GN=LUC7L2 PE=1 SV=2	11	0.000370941	0.000191907	0.258699	1	1.93292	0.95078
LUC7L3	O95232	sp|O95232|LC7L3_HUMAN Luc7-like protein 3 OS=Homo sapiens OX=9606 GN=LUC7L3 PE=1 SV=2	8	8.3934e-05	5.44352e-05	0.346774	1	1.54191	0.624716
LUZP1	Q86V48	sp|Q86V48|LUZP1_HUMAN Leucine zipper protein 1 OS=Homo sapiens OX=9606 GN=LUZP1 PE=1 SV=2	3	1.19337e-06	6.15394e-08	0.000615105	4	19.392	4.27739
LYAR	Q9NX58	sp|Q9NX58|LYAR_HUMAN Cell growth-regulating nucleolar protein OS=Homo sapiens OX=9606 GN=LYAR PE=1 SV=2	9	0.000154144	0.00016552	0.405971	1	0.931273	-0.102723
LYN	P07948	sp|P07948|LYN_HUMAN Tyrosine-protein kinase Lyn OS=Homo sapiens OX=9606 GN=LYN PE=1 SV=3;sp|P08631|HCK_HUMAN Tyrosine-protein kinase HCK OS=Homo sapiens OX=9606 GN=HCK PE=1 SV=5	2	3.37128e-06	6.15394e-08	5.51925e-06	4	54.7825	5.77564
LYPLA2	O95372	sp|O95372|LYPA2_HUMAN Acyl-protein thioesterase 2 OS=Homo sapiens OX=9606 GN=LYPLA2 PE=1 SV=1	5	3.17239e-05	6.25543e-05	0.117978	1	0.507141	-0.979541
LZIC	Q8WZA0	sp|Q8WZA0|LZIC_HUMAN Protein LZIC OS=Homo sapiens OX=9606 GN=LZIC PE=1 SV=1	2	1.97901e-05	6.15394e-08	8.88405e-11	4	321.585	8.32905
LZTFL1	Q9NQ48	sp|Q9NQ48|LZTL1_HUMAN Leucine zipper transcription factor-like protein 1 OS=Homo sapiens OX=9606 GN=LZTFL1 PE=1 SV=1	3	4.41549e-06	6.3477e-06	0.24426	1	0.695605	-0.523661
M6PR	P20645	sp|P20645|MPRD_HUMAN Cation-dependent mannose-6-phosphate receptor OS=Homo sapiens OX=9606 GN=M6PR PE=1 SV=1	4	3.6199e-05	5.66495e-05	0.2047	1	0.639	-0.646112
MACF1	Q9UPN3	sp|Q9UPN3|MACF1_HUMAN Microtubule-actin cross-linking factor 1, isoforms 1/2/3/5 OS=Homo sapiens OX=9606 GN=MACF1 PE=1 SV=4	99	1.84973e-05	8.59892e-06	0.221469	1	2.15112	1.10509
MACROD1	Q9BQ69	sp|Q9BQ69|MACD1_HUMAN ADP-ribose glycohydrolase MACROD1 OS=Homo sapiens OX=9606 GN=MACROD1 PE=1 SV=2	4	3.1525e-05	1.71609e-05	0.277485	1	1.83702	0.877368
MAD1L1	Q9Y6D9	sp|Q9Y6D9|MD1L1_HUMAN Mitotic spindle assembly checkpoint protein MAD1 OS=Homo sapiens OX=9606 GN=MAD1L1 PE=1 SV=2	5	3.30167e-06	5.07447e-06	0.212782	1	0.650644	-0.62006
MAD2L1	Q13257	sp|Q13257|MD2L1_HUMAN Mitotic spindle assembly checkpoint protein MAD2A OS=Homo sapiens OX=9606 GN=MAD2L1 PE=1 SV=1	6	5.21107e-05	5.53578e-05	0.412484	1	0.941343	-0.0872075
MADD	Q8WXG6	sp|Q8WXG6|MADD_HUMAN MAP kinase-activating death domain protein OS=Homo sapiens OX=9606 GN=MADD PE=1 SV=2	3	8.53263e-07	6.15394e-08	0.00214658	3	13.8653	3.79341
MAGED2	Q9UNF1	sp|Q9UNF1|MAGD2_HUMAN Melanoma-associated antigen D2 OS=Homo sapiens OX=9606 GN=MAGED2 PE=1 SV=2	11	3.43095e-05	2.97087e-05	0.472062	1	1.15486	0.207724
MAGOH	P61326	sp|P61326|MGN_HUMAN Protein mago nashi homolog OS=Homo sapiens OX=9606 GN=MAGOH PE=1 SV=1	1	1.03426e-05	1.13114e-05	0.394923	1	0.914346	-0.129187
MAGOHB	Q96A72	sp|Q96A72|MGN2_HUMAN Protein mago nashi homolog 2 OS=Homo sapiens OX=9606 GN=MAGOHB PE=1 SV=1	1	0.000259559	0.000310004	0.343199	1	0.837277	-0.256223
MAGT1	Q9H0U3	sp|Q9H0U3|MAGT1_HUMAN Magnesium transporter protein 1 OS=Homo sapiens OX=9606 GN=MAGT1 PE=1 SV=1	7	9.94479e-05	0.000121049	0.332398	1	0.82155	-0.28358
MAIP1	Q8WWC4	sp|Q8WWC4|MAIP1_HUMAN m-AAA protease-interacting protein 1, mitochondrial OS=Homo sapiens OX=9606 GN=MAIP1 PE=1 SV=1	5	3.87847e-06	3.13694e-05	0.000355958	4	0.123638	-3.0158
MAK16	Q9BXY0	sp|Q9BXY0|MAK16_HUMAN Protein MAK16 homolog OS=Homo sapiens OX=9606 GN=MAK16 PE=1 SV=2	3	1.64089e-05	2.4542e-05	0.225316	1	0.668606	-0.580772
MALT1	Q9UDY8	sp|Q9UDY8|MALT1_HUMAN Mucosa-associated lymphoid tissue lymphoma translocation protein 1 OS=Homo sapiens OX=9606 GN=MALT1 PE=1 SV=1	5	7.75694e-06	6.15394e-08	4.91785e-08	4	126.048	6.97783
MAN1B1	Q9UKM7	sp|Q9UKM7|MA1B1_HUMAN Endoplasmic reticulum mannosyl-oligosaccharide 1,2-alpha-mannosidase OS=Homo sapiens OX=9606 GN=MAN1B1 PE=1 SV=2	5	4.67405e-06	9.79834e-06	0.100172	1	0.477025	-1.06786
MAN2A1	Q16706	sp|Q16706|MA2A1_HUMAN Alpha-mannosidase 2 OS=Homo sapiens OX=9606 GN=MAN2A1 PE=1 SV=2	23	2.20774e-05	2.93396e-05	0.284279	1	0.752478	-0.410279
MANBAL	Q9NQG1	sp|Q9NQG1|MANBL_HUMAN Protein MANBAL OS=Homo sapiens OX=9606 GN=MANBAL PE=1 SV=1	2	8.00556e-06	6.15394e-08	4.04537e-08	4	130.088	7.02335
MANF	P55145	sp|P55145|MANF_HUMAN Mesencephalic astrocyte-derived neurotrophic factor OS=Homo sapiens OX=9606 GN=MANF PE=1 SV=3	8	0.000245636	0.000159615	0.347574	1	1.53893	0.621927
MAOA	P21397	sp|P21397|AOFA_HUMAN Amine oxidase [flavin-containing] A OS=Homo sapiens OX=9606 GN=MAOA PE=1 SV=1	10	3.7293e-05	4.53934e-05	0.332398	1	0.82155	-0.28358
MAP1B	P46821	sp|P46821|MAP1B_HUMAN Microtubule-associated protein 1B OS=Homo sapiens OX=9606 GN=MAP1B PE=1 SV=2	45	5.84754e-05	3.35837e-05	0.297962	1	1.74118	0.800066
MAP1LC3B2	A6NCE7	sp|A6NCE7|MP3B2_HUMAN Microtubule-associated proteins 1A/1B light chain 3 beta 2 OS=Homo sapiens OX=9606 GN=MAP1LC3B2 PE=2 SV=1;sp|Q9GZQ8|MLP3B_HUMAN Microtubule-associated proteins 1A/1B light chain 3B OS=Homo sapiens OX=9606 GN=MAP1LC3B PE=1 SV=3;sp|Q9H4	3	0.000103426	9.5769e-05	0.497179	1	1.07995	0.110965
MAP1S	Q66K74	sp|Q66K74|MAP1S_HUMAN Microtubule-associated protein 1S OS=Homo sapiens OX=9606 GN=MAP1S PE=1 SV=2	7	1.08398e-05	1.5777e-05	0.238259	1	0.687066	-0.54148
MAP2K1	Q02750	sp|Q02750|MP2K1_HUMAN Dual specificity mitogen-activated protein kinase kinase 1 OS=Homo sapiens OX=9606 GN=MAP2K1 PE=1 SV=2	5	3.63979e-05	1.88217e-05	0.258528	1	1.93383	0.951463
MAP2K2	P36507	sp|P36507|MP2K2_HUMAN Dual specificity mitogen-activated protein kinase kinase 2 OS=Homo sapiens OX=9606 GN=MAP2K2 PE=1 SV=1	10	4.3956e-05	4.92685e-05	0.38027	1	0.892173	-0.164605
MAP2K3	P46734	sp|P46734|MP2K3_HUMAN Dual specificity mitogen-activated protein kinase kinase 3 OS=Homo sapiens OX=9606 GN=MAP2K3 PE=1 SV=2	9	3.71935e-05	2.47265e-05	0.357074	1	1.5042	0.588993
MAP2K4	P45985	sp|P45985|MP2K4_HUMAN Dual specificity mitogen-activated protein kinase kinase 4 OS=Homo sapiens OX=9606 GN=MAP2K4 PE=1 SV=1	1	3.1525e-06	6.15394e-08	7.78181e-06	4	51.2273	5.67884
MAP3K2	Q9Y2U5	sp|Q9Y2U5|M3K2_HUMAN Mitogen-activated protein kinase kinase kinase 2 OS=Homo sapiens OX=9606 GN=MAP3K2 PE=1 SV=2	1	3.31659e-08	6.15394e-08	0.137773	1	0.538937	-0.891812
MAP3K20	Q9NYL2	sp|Q9NYL2|M3K20_HUMAN Mitogen-activated protein kinase kinase kinase 20 OS=Homo sapiens OX=9606 GN=MAP3K20 PE=1 SV=3	5	1.92929e-06	8.91261e-07	0.219382	1	2.16467	1.11415
MAP4	P27816	sp|P27816|MAP4_HUMAN Microtubule-associated protein 4 OS=Homo sapiens OX=9606 GN=MAP4 PE=1 SV=3	33	0.000135249	9.04178e-05	0.35941	1	1.49582	0.580941
MAP4K4	O95819	sp|O95819|M4K4_HUMAN Mitogen-activated protein kinase kinase kinase kinase 4 OS=Homo sapiens OX=9606 GN=MAP4K4 PE=1 SV=2;sp|Q8N4C8|MINK1_HUMAN Misshapen-like kinase 1 OS=Homo sapiens OX=9606 GN=MINK1 PE=1 SV=2;sp|Q9UKE5|TNIK_HUMAN TRAF2 and NCK-interacting	6	6.23538e-06	4.18874e-06	0.36144	1	1.48861	0.573961
MAP4K5	Q9Y4K4	sp|Q9Y4K4|M4K5_HUMAN Mitogen-activated protein kinase kinase kinase kinase 5 OS=Homo sapiens OX=9606 GN=MAP4K5 PE=1 SV=2;sp|Q8IVH8|M4K3_HUMAN Mitogen-activated protein kinase kinase kinase kinase 3 OS=Homo sapiens OX=9606 GN=MAP4K3 PE=1 SV=1	2	1.20332e-06	6.15394e-08	0.000595383	4	19.5536	4.28936
MAP7D1	Q3KQU3	sp|Q3KQU3|MA7D1_HUMAN MAP7 domain-containing protein 1 OS=Homo sapiens OX=9606 GN=MAP7D1 PE=1 SV=1	2	4.91273e-06	6.15394e-08	7.25786e-07	4	79.8305	6.31887
MAP7D3	Q8IWC1	sp|Q8IWC1|MA7D3_HUMAN MAP7 domain-containing protein 3 OS=Homo sapiens OX=9606 GN=MAP7D3 PE=1 SV=2	3	9.61661e-06	7.47331e-06	0.424135	1	1.28679	0.363782
MAPK1	P28482	sp|P28482|MK01_HUMAN Mitogen-activated protein kinase 1 OS=Homo sapiens OX=9606 GN=MAPK1 PE=1 SV=3	10	9.4575e-05	8.24832e-05	0.475268	1	1.1466	0.197359
MAPK10	P53779	sp|P53779|MK10_HUMAN Mitogen-activated protein kinase 10 OS=Homo sapiens OX=9606 GN=MAPK10 PE=1 SV=2;sp|P45983|MK08_HUMAN Mitogen-activated protein kinase 8 OS=Homo sapiens OX=9606 GN=MAPK8 PE=1 SV=2;sp|P45984|MK09_HUMAN Mitogen-activated protein kinase 9	3	3.37128e-06	6.15394e-08	5.51925e-06	4	54.7825	5.77564
MAPK14	Q16539	sp|Q16539|MK14_HUMAN Mitogen-activated protein kinase 14 OS=Homo sapiens OX=9606 GN=MAPK14 PE=1 SV=3	9	2.39669e-05	1.84526e-05	0.420049	1	1.29884	0.377221
MAPK15	Q8TD08	sp|Q8TD08|MK15_HUMAN Mitogen-activated protein kinase 15 OS=Homo sapiens OX=9606 GN=MAPK15 PE=1 SV=1	1	8.40335e-06	4.83458e-06	0.298633	1	1.73817	0.797573
MAPK1IP1L	Q8NDC0	sp|Q8NDC0|MISSL_HUMAN MAPK-interacting and spindle-stabilizing protein-like OS=Homo sapiens OX=9606 GN=MAPK1IP1L PE=1 SV=4	1	0.000159117	6.15394e-08	1.44377e-18	4	2585.6	11.3363
MAPK3	P27361	sp|P27361|MK03_HUMAN Mitogen-activated protein kinase 3 OS=Homo sapiens OX=9606 GN=MAPK3 PE=1 SV=4	2	2.94366e-06	1.58139e-06	0.272547	1	1.86144	0.896418
MAPKAPK2	P49137	sp|P49137|MAPK2_HUMAN MAP kinase-activated protein kinase 2 OS=Homo sapiens OX=9606 GN=MAPKAPK2 PE=1 SV=1	1	8.78125e-06	6.15394e-08	2.2661e-08	4	142.693	7.15677
MAPRE1	Q15691	sp|Q15691|MARE1_HUMAN Microtubule-associated protein RP/EB family member 1 OS=Homo sapiens OX=9606 GN=MAPRE1 PE=1 SV=3	14	0.000574809	0.000411493	0.38846	1	1.39689	0.482214
MARCH5	Q9NX47	sp|Q9NX47|MARH5_HUMAN E3 ubiquitin-protein ligase MARCH5 OS=Homo sapiens OX=9606 GN=MARCH5 PE=1 SV=1	4	1.2431e-05	2.25122e-05	0.146281	1	0.552189	-0.856765
MARCKS	P29966	sp|P29966|MARCS_HUMAN Myristoylated alanine-rich C-kinase substrate OS=Homo sapiens OX=9606 GN=MARCKS PE=1 SV=4	9	0.000690168	0.000758402	0.392086	1	0.91003	-0.136015
MARCKSL1	P49006	sp|P49006|MRP_HUMAN MARCKS-related protein OS=Homo sapiens OX=9606 GN=MARCKSL1 PE=1 SV=2	5	4.82322e-05	7.89772e-05	0.185254	1	0.610711	-0.711438
MARK2	Q7KZI7	sp|Q7KZI7|MARK2_HUMAN Serine/threonine-protein kinase MARK2 OS=Homo sapiens OX=9606 GN=MARK2 PE=1 SV=2	3	2.11824e-06	1.14406e-06	0.274542	1	1.85151	0.888701
MARS	P56192	sp|P56192|SYMC_HUMAN Methionine--tRNA ligase, cytoplasmic OS=Homo sapiens OX=9606 GN=MARS PE=1 SV=2	20	8.93042e-05	6.95663e-05	0.425183	1	1.28373	0.360339
MAT2A	P31153	sp|P31153|METK2_HUMAN S-adenosylmethionine synthase isoform type-2 OS=Homo sapiens OX=9606 GN=MAT2A PE=1 SV=1	13	0.000174034	0.000109055	0.332661	1	1.59584	0.674313
MAT2B	Q9NZL9	sp|Q9NZL9|MAT2B_HUMAN Methionine adenosyltransferase 2 subunit beta OS=Homo sapiens OX=9606 GN=MAT2B PE=1 SV=1	9	7.28953e-05	6.49532e-05	0.484843	1	1.12227	0.166426
MATR3	P43243	sp|P43243|MATR3_HUMAN Matrin-3 OS=Homo sapiens OX=9606 GN=MATR3 PE=1 SV=2	32	0.000461438	0.00052959	0.366309	1	0.871313	-0.198738
MAU2	Q9Y6X3	sp|Q9Y6X3|SCC4_HUMAN MAU2 chromatid cohesion factor homolog OS=Homo sapiens OX=9606 GN=MAU2 PE=1 SV=2	2	1.7105e-06	6.15394e-08	0.00013884	4	27.7952	4.79677
MAVS	Q7Z434	sp|Q7Z434|MAVS_HUMAN Mitochondrial antiviral-signaling protein OS=Homo sapiens OX=9606 GN=MAVS PE=1 SV=2	9	5.01217e-05	4.02267e-05	0.438331	1	1.24598	0.317284
MBD2	Q9UBB5	sp|Q9UBB5|MBD2_HUMAN Methyl-CpG-binding domain protein 2 OS=Homo sapiens OX=9606 GN=MBD2 PE=1 SV=1	1	3.31659e-08	3.33992e-06	1.28402e-13	4	0.00993014	-6.65397
MBD3	O95983	sp|O95983|MBD3_HUMAN Methyl-CpG-binding domain protein 3 OS=Homo sapiens OX=9606 GN=MBD3 PE=1 SV=1	3	3.48068e-06	4.52089e-06	0.296504	1	0.76991	-0.377239
MBNL1	Q9NR56	sp|Q9NR56|MBNL1_HUMAN Muscleblind-like protein 1 OS=Homo sapiens OX=9606 GN=MBNL1 PE=1 SV=2;sp|Q5VZF2|MBNL2_HUMAN Muscleblind-like protein 2 OS=Homo sapiens OX=9606 GN=MBNL2 PE=1 SV=2	3	7.76688e-06	5.75721e-06	0.4035	1	1.34907	0.431965
MBOAT7	Q96N66	sp|Q96N66|MBOA7_HUMAN Lysophospholipid acyltransferase 7 OS=Homo sapiens OX=9606 GN=MBOAT7 PE=1 SV=2	11	0.000275471	0.000343219	0.319302	1	0.80261	-0.317228
MBP	P02686	sp|P02686|MBP_HUMAN Myelin basic protein OS=Homo sapiens OX=9606 GN=MBP PE=1 SV=3	3	8.07517e-06	6.15394e-08	3.83344e-08	4	131.219	7.03584
MCAM	P43121	sp|P43121|MUC18_HUMAN Cell surface glycoprotein MUC18 OS=Homo sapiens OX=9606 GN=MCAM PE=1 SV=2	1	2.5757e-06	1.75853e-06	0.368263	1	1.46469	0.550592
MCAT	Q8IVS2	sp|Q8IVS2|FABD_HUMAN Malonyl-CoA-acyl carrier protein transacylase, mitochondrial OS=Homo sapiens OX=9606 GN=MCAT PE=1 SV=2	2	3.31659e-08	3.13694e-06	2.646e-13	4	0.0105727	-6.56352
MCCC1	Q96RQ3	sp|Q96RQ3|MCCA_HUMAN Methylcrotonoyl-CoA carboxylase subunit alpha, mitochondrial OS=Homo sapiens OX=9606 GN=MCCC1 PE=1 SV=3	9	1.69061e-05	2.41729e-05	0.246918	1	0.699384	-0.515844
MCCC2	Q9HCC0	sp|Q9HCC0|MCCB_HUMAN Methylcrotonoyl-CoA carboxylase beta chain, mitochondrial OS=Homo sapiens OX=9606 GN=MCCC2 PE=1 SV=1	11	2.9536e-05	2.78634e-05	0.485605	1	1.06003	0.0841026
MCFD2	Q8NI22	sp|Q8NI22|MCFD2_HUMAN Multiple coagulation factor deficiency protein 2 OS=Homo sapiens OX=9606 GN=MCFD2 PE=1 SV=1	5	0.00034409	0.000509292	0.230231	1	0.675624	-0.565708
MCM2	P49736	sp|P49736|MCM2_HUMAN DNA replication licensing factor MCM2 OS=Homo sapiens OX=9606 GN=MCM2 PE=1 SV=4	19	2.91382e-05	3.48754e-05	0.341979	1	0.835495	-0.259297
MCM3	P25205	sp|P25205|MCM3_HUMAN DNA replication licensing factor MCM3 OS=Homo sapiens OX=9606 GN=MCM3 PE=1 SV=3	29	7.51826e-05	8.80189e-05	0.354713	1	0.854164	-0.227415
MCM4	P33991	sp|P33991|MCM4_HUMAN DNA replication licensing factor MCM4 OS=Homo sapiens OX=9606 GN=MCM4 PE=1 SV=5	21	5.47958e-05	3.1923e-05	0.303531	1	1.7165	0.779468
MCM5	P33992	sp|P33992|MCM5_HUMAN DNA replication licensing factor MCM5 OS=Homo sapiens OX=9606 GN=MCM5 PE=1 SV=5	15	5.22102e-05	5.11137e-05	0.462607	1	1.02145	0.0306196
MCM6	Q14566	sp|Q14566|MCM6_HUMAN DNA replication licensing factor MCM6 OS=Homo sapiens OX=9606 GN=MCM6 PE=1 SV=1	22	3.94808e-05	4.26255e-05	0.402689	1	0.926225	-0.110566
MCM7	P33993	sp|P33993|MCM7_HUMAN DNA replication licensing factor MCM7 OS=Homo sapiens OX=9606 GN=MCM7 PE=1 SV=4	19	8.8807e-05	8.80189e-05	0.454993	1	1.00895	0.0128591
MCMBP	Q9BTE3	sp|Q9BTE3|MCMBP_HUMAN Mini-chromosome maintenance complex-binding protein OS=Homo sapiens OX=9606 GN=MCMBP PE=1 SV=2	9	2.92377e-05	1.82681e-05	0.331479	1	1.60048	0.678504
MCTS1	Q9ULC4	sp|Q9ULC4|MCTS1_HUMAN Malignant T-cell-amplified sequence 1 OS=Homo sapiens OX=9606 GN=MCTS1 PE=1 SV=1	7	0.000235692	0.000225122	0.477895	1	1.04695	0.0661941
MCU	Q8NE86	sp|Q8NE86|MCU_HUMAN Calcium uniporter protein, mitochondrial OS=Homo sapiens OX=9606 GN=MCU PE=1 SV=1	3	1.39227e-05	3.93041e-06	0.092371	1	3.54231	1.82469
MDC1	Q14676	sp|Q14676|MDC1_HUMAN Mediator of DNA damage checkpoint protein 1 OS=Homo sapiens OX=9606 GN=MDC1 PE=1 SV=3	8	6.81218e-06	7.89772e-06	0.360397	1	0.862551	-0.213319
MDH1	P40925	sp|P40925|MDHC_HUMAN Malate dehydrogenase, cytoplasmic OS=Homo sapiens OX=9606 GN=MDH1 PE=1 SV=4	12	0.000431604	0.000300778	0.376959	1	1.43496	0.521011
MDH2	P40926	sp|P40926|MDHM_HUMAN Malate dehydrogenase, mitochondrial OS=Homo sapiens OX=9606 GN=MDH2 PE=1 SV=3	19	0.00180995	0.00175484	0.468614	1	1.0314	0.0446094
MDN1	Q9NU22	sp|Q9NU22|MDN1_HUMAN Midasin OS=Homo sapiens OX=9606 GN=MDN1 PE=1 SV=2	5	3.52046e-06	1.53341e-07	0.000311961	4	22.9583	4.52095
ME1	P48163	sp|P48163|MAOX_HUMAN NADP-dependent malic enzyme OS=Homo sapiens OX=9606 GN=ME1 PE=1 SV=1	3	5.83759e-06	2.4911e-06	0.194017	1	2.34338	1.22859
ME2	P23368	sp|P23368|MAOM_HUMAN NAD-dependent malic enzyme, mitochondrial OS=Homo sapiens OX=9606 GN=ME2 PE=1 SV=1	13	4.17681e-05	6.07091e-05	0.238918	1	0.688005	-0.53951
MEA1	Q16626	sp|Q16626|MEA1_HUMAN Male-enhanced antigen 1 OS=Homo sapiens OX=9606 GN=MEA1 PE=1 SV=2	1	3.31659e-08	2.93396e-05	4.97824e-27	4	0.00113041	-9.78894
MEAF6	Q9HAF1	sp|Q9HAF1|EAF6_HUMAN Chromatin modification-related protein MEAF6 OS=Homo sapiens OX=9606 GN=MEAF6 PE=1 SV=1	2	1.89946e-05	1.75484e-05	0.498592	1	1.08241	0.114244
MEAK7	Q6P9B6	sp|Q6P9B6|MEAK7_HUMAN MTOR-associated protein MEAK7 OS=Homo sapiens OX=9606 GN=MEAK7 PE=1 SV=2	6	2.1978e-05	2.52801e-05	0.365007	1	0.86938	-0.201941
MECP2	P51608	sp|P51608|MECP2_HUMAN Methyl-CpG-binding protein 2 OS=Homo sapiens OX=9606 GN=MECP2 PE=1 SV=1	7	2.20774e-05	7.73164e-06	0.139025	1	2.85547	1.51373
MED1	Q15648	sp|Q15648|MED1_HUMAN Mediator of RNA polymerase II transcription subunit 1 OS=Homo sapiens OX=9606 GN=MED1 PE=1 SV=4	2	5.09173e-07	6.15394e-08	0.0113895	2	8.27393	3.04857
MED10	Q9BTT4	sp|Q9BTT4|MED10_HUMAN Mediator of RNA polymerase II transcription subunit 10 OS=Homo sapiens OX=9606 GN=MED10 PE=1 SV=1	1	3.31659e-08	4.13338e-06	1.02457e-14	4	0.0080239	-6.96148
MED14	O60244	sp|O60244|MED14_HUMAN Mediator of RNA polymerase II transcription subunit 14 OS=Homo sapiens OX=9606 GN=MED14 PE=1 SV=2	4	9.52711e-07	6.36615e-07	0.359214	1	1.49653	0.581617
MED15	Q96RN5	sp|Q96RN5|MED15_HUMAN Mediator of RNA polymerase II transcription subunit 15 OS=Homo sapiens OX=9606 GN=MED15 PE=1 SV=2	2	1.82984e-06	5.6465e-06	0.0298406	2	0.324067	-1.62564
MED16	Q9Y2X0	sp|Q9Y2X0|MED16_HUMAN Mediator of RNA polymerase II transcription subunit 16 OS=Homo sapiens OX=9606 GN=MED16 PE=1 SV=2	3	3.08289e-06	6.15394e-08	8.71385e-06	4	50.0961	5.64663
MED17	Q9NVC6	sp|Q9NVC6|MED17_HUMAN Mediator of RNA polymerase II transcription subunit 17 OS=Homo sapiens OX=9606 GN=MED17 PE=1 SV=2	1	3.31659e-08	6.15394e-08	0.137773	1	0.538937	-0.891812
MED23	Q9ULK4	sp|Q9ULK4|MED23_HUMAN Mediator of RNA polymerase II transcription subunit 23 OS=Homo sapiens OX=9606 GN=MED23 PE=1 SV=2	4	1.3326e-06	3.45064e-07	0.0773518	1	3.8619	1.94931
MED24	O75448	sp|O75448|MED24_HUMAN Mediator of RNA polymerase II transcription subunit 24 OS=Homo sapiens OX=9606 GN=MED24 PE=1 SV=1	2	1.59117e-06	3.1923e-07	0.0437171	2	4.98439	2.31742
MED31	Q9Y3C7	sp|Q9Y3C7|MED31_HUMAN Mediator of RNA polymerase II transcription subunit 31 OS=Homo sapiens OX=9606 GN=MED31 PE=1 SV=1	1	5.53925e-06	6.15394e-08	3.66667e-07	4	90.0113	6.49203
MED4	Q9NPJ6	sp|Q9NPJ6|MED4_HUMAN Mediator of RNA polymerase II transcription subunit 4 OS=Homo sapiens OX=9606 GN=MED4 PE=1 SV=1	1	3.74919e-06	4.77923e-06	0.306684	1	0.784476	-0.350199
MED9	Q9NWA0	sp|Q9NWA0|MED9_HUMAN Mediator of RNA polymerase II transcription subunit 9 OS=Homo sapiens OX=9606 GN=MED9 PE=1 SV=1	1	3.31659e-08	6.15394e-08	0.137773	1	0.538937	-0.891812
MELK	Q14680	sp|Q14680|MELK_HUMAN Maternal embryonic leucine zipper kinase OS=Homo sapiens OX=9606 GN=MELK PE=1 SV=3	2	1.12376e-05	1.19757e-05	0.410563	1	0.938365	-0.0917794
MELTF	P08582	sp|P08582|TRFM_HUMAN Melanotransferrin OS=Homo sapiens OX=9606 GN=MELTF PE=1 SV=2	23	6.29505e-05	5.6834e-05	0.490717	1	1.10762	0.147463
MEMO1	Q9Y316	sp|Q9Y316|MEMO1_HUMAN Protein MEMO1 OS=Homo sapiens OX=9606 GN=MEMO1 PE=1 SV=1	2	7.96578e-06	6.15394e-08	4.1724e-08	4	129.442	7.01616
MEN1	O00255	sp|O00255|MEN1_HUMAN Menin OS=Homo sapiens OX=9606 GN=MEN1 PE=1 SV=4	1	1.25304e-06	6.15394e-08	0.000507264	4	20.3616	4.34778
MEPCE	Q7L2J0	sp|Q7L2J0|MEPCE_HUMAN 7SK snRNA methylphosphate capping enzyme OS=Homo sapiens OX=9606 GN=MEPCE PE=1 SV=1	2	8.89064e-07	1.17728e-06	0.286182	1	0.755187	-0.405093
MESD	Q14696	sp|Q14696|MESD_HUMAN LRP chaperone MESD OS=Homo sapiens OX=9606 GN=MESD PE=1 SV=2	8	9.88512e-05	0.000147252	0.227207	1	0.671307	-0.574955
METAP1	P53582	sp|P53582|MAP11_HUMAN Methionine aminopeptidase 1 OS=Homo sapiens OX=9606 GN=METAP1 PE=1 SV=2	10	1.31271e-05	1.37841e-05	0.419544	1	0.952338	-0.070454
METAP2	P50579	sp|P50579|MAP2_HUMAN Methionine aminopeptidase 2 OS=Homo sapiens OX=9606 GN=METAP2 PE=1 SV=1	10	0.000114365	9.59536e-05	0.458011	1	1.19188	0.253239
METTL3	Q86U44	sp|Q86U44|MTA70_HUMAN N6-adenosine-methyltransferase catalytic subunit OS=Homo sapiens OX=9606 GN=METTL3 PE=1 SV=2	2	3.31659e-08	6.15394e-08	0.137773	1	0.538937	-0.891812
MFAP1	P55081	sp|P55081|MFAP1_HUMAN Microfibrillar-associated protein 1 OS=Homo sapiens OX=9606 GN=MFAP1 PE=1 SV=2	4	5.34035e-05	1.31567e-05	0.0695818	1	4.05903	2.02114
MFF	Q9GZY8	sp|Q9GZY8|MFF_HUMAN Mitochondrial fission factor OS=Homo sapiens OX=9606 GN=MFF PE=1 SV=1	3	7.79672e-06	4.44708e-06	0.29529	1	1.75322	0.810009
MFN2	O95140	sp|O95140|MFN2_HUMAN Mitofusin-2 OS=Homo sapiens OX=9606 GN=MFN2 PE=1 SV=3	8	1.59117e-05	1.47067e-05	0.498318	1	1.08193	0.113608
MFSD1	Q9H3U5	sp|Q9H3U5|MFSD1_HUMAN Major facilitator superfamily domain-containing protein 1 OS=Homo sapiens OX=9606 GN=MFSD1 PE=2 SV=2	1	3.31659e-08	4.50244e-06	3.60342e-15	4	0.00736621	-7.08486
MFSD10	Q14728	sp|Q14728|MFS10_HUMAN Major facilitator superfamily domain-containing protein 10 OS=Homo sapiens OX=9606 GN=MFSD10 PE=1 SV=1	4	2.46631e-05	1.2068e-05	0.23891	1	2.04367	1.03117
MFSD12	Q6NUT3	sp|Q6NUT3|MFS12_HUMAN Major facilitator superfamily domain-containing protein 12 OS=Homo sapiens OX=9606 GN=MFSD12 PE=1 SV=2	2	3.31659e-08	5.3328e-06	4.32647e-16	4	0.00621922	-7.32905
MFSD14B	Q5SR56	sp|Q5SR56|MF14B_HUMAN Hippocampus abundant transcript-like protein 1 OS=Homo sapiens OX=9606 GN=MFSD14B PE=2 SV=3	2	7.78677e-06	6.15394e-08	4.80268e-08	4	126.533	6.98337
MGAT1	P26572	sp|P26572|MGAT1_HUMAN Alpha-1,3-mannosyl-glycoprotein 2-beta-N-acetylglucosaminyltransferase OS=Homo sapiens OX=9606 GN=MGAT1 PE=1 SV=2	8	3.88841e-05	8.46975e-06	0.0529465	1	4.59094	2.19879
MGAT2	Q10469	sp|Q10469|MGAT2_HUMAN Alpha-1,6-mannosyl-glycoprotein 2-beta-N-acetylglucosaminyltransferase OS=Homo sapiens OX=9606 GN=MGAT2 PE=1 SV=1	7	7.6376e-06	2.02979e-06	0.0816643	1	3.76276	1.91179
MGST1	P10620	sp|P10620|MGST1_HUMAN Microsomal glutathione S-transferase 1 OS=Homo sapiens OX=9606 GN=MGST1 PE=1 SV=1	4	0.000958678	0.000859892	0.487796	1	1.11488	0.156891
MGST2	Q99735	sp|Q99735|MGST2_HUMAN Microsomal glutathione S-transferase 2 OS=Homo sapiens OX=9606 GN=MGST2 PE=1 SV=1	1	6.7724e-05	7.27033e-05	0.406127	1	0.931513	-0.102353
MGST3	O14880	sp|O14880|MGST3_HUMAN Microsomal glutathione S-transferase 3 OS=Homo sapiens OX=9606 GN=MGST3 PE=1 SV=1	4	0.00013326	0.000287861	0.0922035	1	0.462933	-1.11112
MIA2	Q96PC5	sp|Q96PC5|MIA2_HUMAN Melanoma inhibitory activity protein 2 OS=Homo sapiens OX=9606 GN=MIA2 PE=1 SV=4;sp|Q96RT6|CTGE2_HUMAN cTAGE family member 2 OS=Homo sapiens OX=9606 GN=CTAGE1 PE=1 SV=2;sp|A4FU28|CTGE9_HUMAN cTAGE family member 9 OS=Homo sapiens OX=960	4	9.69617e-07	6.47687e-07	0.359068	1	1.49705	0.582119
MIA3	Q5JRA6	sp|Q5JRA6|TGO1_HUMAN Transport and Golgi organization protein 1 homolog OS=Homo sapiens OX=9606 GN=MIA3 PE=1 SV=1	11	1.79006e-06	1.14406e-05	0.00127246	3	0.156466	-2.67608
MICAL2	O94851	sp|O94851|MICA2_HUMAN [F-actin]-monooxygenase MICAL2 OS=Homo sapiens OX=9606 GN=MICAL2 PE=1 SV=1	15	1.38233e-05	1.75115e-05	0.310104	1	0.789381	-0.341207
MICOS13	Q5XKP0	sp|Q5XKP0|MIC13_HUMAN MICOS complex subunit MIC13 OS=Homo sapiens OX=9606 GN=MICOS13 PE=1 SV=1	3	0.000132266	0.000175853	0.284039	1	0.752136	-0.410934
MICU2	Q8IYU8	sp|Q8IYU8|MICU2_HUMAN Calcium uptake protein 2, mitochondrial OS=Homo sapiens OX=9606 GN=MICU2 PE=1 SV=2	2	3.02322e-06	2.87861e-06	0.47984	1	1.05024	0.0707135
MID1	O15344	sp|O15344|TRI18_HUMAN E3 ubiquitin-protein ligase Midline-1 OS=Homo sapiens OX=9606 GN=MID1 PE=1 SV=1	2	3.31659e-08	2.65718e-06	1.71488e-12	4	0.0124816	-6.32405
MIEF1	L0R8F8	sp|L0R8F8|MIDUO_HUMAN MIEF1 upstream open reading frame protein OS=Homo sapiens OX=9606 GN=MIEF1 PE=1 SV=1	1	1.12376e-05	1.09424e-05	0.465949	1	1.02698	0.0384069
MIEN1	Q9BRT3	sp|Q9BRT3|MIEN1_HUMAN Migration and invasion enhancer 1 OS=Homo sapiens OX=9606 GN=MIEN1 PE=1 SV=1	1	2.1083e-05	1.88217e-05	0.485692	1	1.12014	0.163683
MIF	P14174	sp|P14174|MIF_HUMAN Macrophage migration inhibitory factor OS=Homo sapiens OX=9606 GN=MIF PE=1 SV=4	2	0.00122321	0.000782391	0.341058	1	1.56343	0.64471
MINPP1	Q9UNW1	sp|Q9UNW1|MINP1_HUMAN Multiple inositol polyphosphate phosphatase 1 OS=Homo sapiens OX=9606 GN=MINPP1 PE=1 SV=1	2	1.621e-06	1.48543e-06	0.497369	1	1.09126	0.125999
MIPEP	Q99797	sp|Q99797|MIPEP_HUMAN Mitochondrial intermediate peptidase OS=Homo sapiens OX=9606 GN=MIPEP PE=1 SV=2	2	1.68067e-06	6.15394e-08	0.000149851	4	27.3104	4.77138
MKI67	P46013	sp|P46013|KI67_HUMAN Proliferation marker protein Ki-67 OS=Homo sapiens OX=9606 GN=MKI67 PE=1 SV=2	29	7.10058e-06	5.46197e-06	0.419656	1	1.3	0.378515
MKNK1	Q9BUB5	sp|Q9BUB5|MKNK1_HUMAN MAP kinase-interacting serine/threonine-protein kinase 1 OS=Homo sapiens OX=9606 GN=MKNK1 PE=1 SV=1	1	3.31659e-08	1.67734e-05	4.157e-23	4	0.00197729	-8.98226
MKRN2	Q9H000	sp|Q9H000|MKRN2_HUMAN Probable E3 ubiquitin-protein ligase makorin-2 OS=Homo sapiens OX=9606 GN=MKRN2 PE=1 SV=2	1	3.31659e-08	1.63306e-06	2.82026e-10	4	0.0203091	-5.62173
MLEC	Q14165	sp|Q14165|MLEC_HUMAN Malectin OS=Homo sapiens OX=9606 GN=MLEC PE=1 SV=1	13	0.000170056	0.000152049	0.486379	1	1.11842	0.161468
MLF2	Q15773	sp|Q15773|MLF2_HUMAN Myeloid leukemia factor 2 OS=Homo sapiens OX=9606 GN=MLF2 PE=1 SV=1	1	3.31659e-08	6.15394e-08	0.137773	1	0.538937	-0.891812
MLLT1	Q03111	sp|Q03111|ENL_HUMAN Protein ENL OS=Homo sapiens OX=9606 GN=MLLT1 PE=1 SV=2	1	3.31659e-08	4.39172e-06	4.89348e-15	4	0.00755191	-7.04894
MLST8	Q9BVC4	sp|Q9BVC4|LST8_HUMAN Target of rapamycin complex subunit LST8 OS=Homo sapiens OX=9606 GN=MLST8 PE=1 SV=1	3	3.31659e-08	1.61091e-05	7.75428e-23	4	0.00205883	-8.92396
MMGT1	Q8N4V1	sp|Q8N4V1|MMGT1_HUMAN Membrane magnesium transporter 1 OS=Homo sapiens OX=9606 GN=MMGT1 PE=1 SV=1	3	1.51161e-05	1.1496e-05	0.414671	1	1.3149	0.394955
MMP14	P50281	sp|P50281|MMP14_HUMAN Matrix metalloproteinase-14 OS=Homo sapiens OX=9606 GN=MMP14 PE=1 SV=3	5	1.58122e-05	1.73455e-05	0.393123	1	0.911606	-0.133518
MMP24OS	A0A0U1RRL7	sp|A0A0U1RRL7|MMPOS_HUMAN Protein MMP24OS OS=Homo sapiens OX=9606 GN=MMP24OS PE=1 SV=1	2	0.000364974	0.000525899	0.243132	1	0.693999	-0.526994
MMS19	Q96T76	sp|Q96T76|MMS19_HUMAN MMS19 nucleotide excision repair protein homolog OS=Homo sapiens OX=9606 GN=MMS19 PE=1 SV=2	17	1.621e-05	1.99288e-05	0.32677	1	0.813395	-0.297971
MMUT	P22033	sp|P22033|MUTA_HUMAN Methylmalonyl-CoA mutase, mitochondrial OS=Homo sapiens OX=9606 GN=MMUT PE=1 SV=4	3	3.31659e-08	3.81969e-06	2.64624e-14	4	0.00868287	-6.84761
MNAT1	P51948	sp|P51948|MAT1_HUMAN CDK-activating kinase assembly factor MAT1 OS=Homo sapiens OX=9606 GN=MNAT1 PE=1 SV=1	3	9.38788e-06	6.15394e-08	1.48139e-08	4	152.551	7.25314
MOB1A	Q9H8S9	sp|Q9H8S9|MOB1A_HUMAN MOB kinase activator 1A OS=Homo sapiens OX=9606 GN=MOB1A PE=1 SV=4;sp|Q7L9L4|MOB1B_HUMAN MOB kinase activator 1B OS=Homo sapiens OX=9606 GN=MOB1B PE=1 SV=3	6	8.62213e-05	7.56557e-05	0.477979	1	1.13965	0.188596
MOB3A	Q96BX8	sp|Q96BX8|MOB3A_HUMAN MOB kinase activator 3A OS=Homo sapiens OX=9606 GN=MOB3A PE=1 SV=1	1	3.31659e-08	6.15394e-08	0.137773	1	0.538937	-0.891812
MOB4	Q9Y3A3	sp|Q9Y3A3|PHOCN_HUMAN MOB-like protein phocein OS=Homo sapiens OX=9606 GN=MOB4 PE=1 SV=1	3	1.78012e-05	6.15394e-08	1.91538e-10	4	289.264	8.17625
MOCS2	O96007	sp|O96007|MOC2B_HUMAN Molybdopterin synthase catalytic subunit OS=Homo sapiens OX=9606 GN=MOCS2 PE=1 SV=1	1	4.44532e-06	6.15394e-08	1.26477e-06	4	72.2353	6.17463
MOGS	Q13724	sp|Q13724|MOGS_HUMAN Mannosyl-oligosaccharide glucosidase OS=Homo sapiens OX=9606 GN=MOGS PE=1 SV=5	28	7.23981e-05	0.000112192	0.209072	1	0.645306	-0.631945
MON2	Q7Z3U7	sp|Q7Z3U7|MON2_HUMAN Protein MON2 homolog OS=Homo sapiens OX=9606 GN=MON2 PE=1 SV=3	4	9.1691e-07	6.15394e-08	0.00166017	3	14.8995	3.8972
MORF4L1	Q9UBU8	sp|Q9UBU8|MO4L1_HUMAN Mortality factor 4-like protein 1 OS=Homo sapiens OX=9606 GN=MORF4L1 PE=1 SV=2;sp|Q15014|MO4L2_HUMAN Mortality factor 4-like protein 2 OS=Homo sapiens OX=9606 GN=MORF4L2 PE=1 SV=1	2	3.12266e-06	3.98576e-06	0.305972	1	0.783455	-0.352079
MOSPD2	Q8NHP6	sp|Q8NHP6|MSPD2_HUMAN Motile sperm domain-containing protein 2 OS=Homo sapiens OX=9606 GN=MOSPD2 PE=1 SV=1	4	7.99561e-06	2.1405e-06	0.0829069	1	3.73539	1.90126
MOV10	Q9HCE1	sp|Q9HCE1|MOV10_HUMAN Helicase MOV-10 OS=Homo sapiens OX=9606 GN=MOV10 PE=1 SV=2	5	1.9989e-06	8.1376e-06	0.0103064	2	0.245638	-2.02539
MPC2	O95563	sp|O95563|MPC2_HUMAN Mitochondrial pyruvate carrier 2 OS=Homo sapiens OX=9606 GN=MPC2 PE=1 SV=1	3	1.78012e-05	1.109e-05	0.330294	1	1.60515	0.682711
MPDU1	O75352	sp|O75352|MPU1_HUMAN Mannose-P-dolichol utilization defect 1 protein OS=Homo sapiens OX=9606 GN=MPDU1 PE=1 SV=2	3	0.000194918	0.000219586	0.377264	1	0.887661	-0.17192
MPG	P29372	sp|P29372|3MG_HUMAN DNA-3-methyladenine glycosylase OS=Homo sapiens OX=9606 GN=MPG PE=1 SV=3	1	3.22211e-06	3.72743e-06	0.361669	1	0.864433	-0.210173
MPHOSPH10	O00566	sp|O00566|MPP10_HUMAN U3 small nucleolar ribonucleoprotein protein MPP10 OS=Homo sapiens OX=9606 GN=MPHOSPH10 PE=1 SV=2	9	1.34255e-05	4.79768e-06	0.144106	1	2.79833	1.48456
MPHOSPH6	Q99547	sp|Q99547|MPH6_HUMAN M-phase phosphoprotein 6 OS=Homo sapiens OX=9606 GN=MPHOSPH6 PE=1 SV=2	1	9.65639e-06	1.55002e-05	0.193655	1	0.622985	-0.68273
MPP1	Q00013	sp|Q00013|EM55_HUMAN 55 kDa erythrocyte membrane protein OS=Homo sapiens OX=9606 GN=MPP1 PE=1 SV=2	1	1.39227e-06	6.15394e-08	0.000331358	4	22.624	4.49978
MPRIP	Q6WCQ1	sp|Q6WCQ1|MPRIP_HUMAN Myosin phosphatase Rho-interacting protein OS=Homo sapiens OX=9606 GN=MPRIP PE=1 SV=3	22	3.32156e-05	2.65718e-05	0.436897	1	1.25003	0.321967
MPST	P25325	sp|P25325|THTM_HUMAN 3-mercaptopyruvate sulfurtransferase OS=Homo sapiens OX=9606 GN=MPST PE=1 SV=3	7	1.95912e-05	1.24555e-05	0.338578	1	1.5729	0.653424
MPZL1	O95297	sp|O95297|MPZL1_HUMAN Myelin protein zero-like protein 1 OS=Homo sapiens OX=9606 GN=MPZL1 PE=1 SV=1	3	3.1525e-05	3.74588e-05	0.346149	1	0.841591	-0.248809
MRE11	P49959	sp|P49959|MRE11_HUMAN Double-strand break repair protein MRE11 OS=Homo sapiens OX=9606 GN=MRE11 PE=1 SV=3	12	3.51051e-05	1.95598e-05	0.286294	1	1.79476	0.843792
MRM3	Q9HC36	sp|Q9HC36|MRM3_HUMAN rRNA methyltransferase 3, mitochondrial OS=Homo sapiens OX=9606 GN=MRM3 PE=1 SV=2	6	1.63095e-05	1.51865e-05	0.493712	1	1.07394	0.10292
MRPL1	Q9BYD6	sp|Q9BYD6|RM01_HUMAN 39S ribosomal protein L1, mitochondrial OS=Homo sapiens OX=9606 GN=MRPL1 PE=1 SV=2	7	4.94256e-05	4.68696e-05	0.482377	1	1.05453	0.0766055
MRPL10	Q7Z7H8	sp|Q7Z7H8|RM10_HUMAN 39S ribosomal protein L10, mitochondrial OS=Homo sapiens OX=9606 GN=MRPL10 PE=1 SV=3	1	1.60111e-05	6.15394e-08	4.0748e-10	4	260.176	8.02335
MRPL11	Q9Y3B7	sp|Q9Y3B7|RM11_HUMAN 39S ribosomal protein L11, mitochondrial OS=Homo sapiens OX=9606 GN=MRPL11 PE=1 SV=1	5	4.46521e-05	2.73099e-05	0.322843	1	1.63502	0.709306
MRPL12	P52815	sp|P52815|RM12_HUMAN 39S ribosomal protein L12, mitochondrial OS=Homo sapiens OX=9606 GN=MRPL12 PE=1 SV=2	7	0.000226741	0.000679056	0.0331403	2	0.333907	-1.58248
MRPL13	Q9BYD1	sp|Q9BYD1|RM13_HUMAN 39S ribosomal protein L13, mitochondrial OS=Homo sapiens OX=9606 GN=MRPL13 PE=1 SV=1	8	2.71493e-05	6.01555e-05	0.0858269	1	0.451318	-1.14778
MRPL14	Q6P1L8	sp|Q6P1L8|RM14_HUMAN 39S ribosomal protein L14, mitochondrial OS=Homo sapiens OX=9606 GN=MRPL14 PE=1 SV=1	3	3.31659e-08	1.24186e-05	3.90925e-21	4	0.00267066	-8.54859
MRPL15	Q9P015	sp|Q9P015|RM15_HUMAN 39S ribosomal protein L15, mitochondrial OS=Homo sapiens OX=9606 GN=MRPL15 PE=1 SV=1	7	1.07404e-05	4.11493e-05	0.0131958	2	0.26101	-1.93782
MRPL16	Q9NX20	sp|Q9NX20|RM16_HUMAN 39S ribosomal protein L16, mitochondrial OS=Homo sapiens OX=9606 GN=MRPL16 PE=1 SV=1	3	3.31659e-08	1.93752e-05	4.35178e-24	4	0.00171177	-9.1903
MRPL17	Q9NRX2	sp|Q9NRX2|RM17_HUMAN 39S ribosomal protein L17, mitochondrial OS=Homo sapiens OX=9606 GN=MRPL17 PE=1 SV=1	5	1.10387e-05	3.63516e-05	0.0236009	2	0.303665	-1.71945
MRPL18	Q9H0U6	sp|Q9H0U6|RM18_HUMAN 39S ribosomal protein L18, mitochondrial OS=Homo sapiens OX=9606 GN=MRPL18 PE=1 SV=1	1	7.53815e-06	6.15394e-08	5.86461e-08	4	122.493	6.93656
MRPL19	P49406	sp|P49406|RM19_HUMAN 39S ribosomal protein L19, mitochondrial OS=Homo sapiens OX=9606 GN=MRPL19 PE=1 SV=2	8	2.31714e-05	4.52089e-05	0.121272	1	0.51254	-0.964264
MRPL2	Q5T653	sp|Q5T653|RM02_HUMAN 39S ribosomal protein L2, mitochondrial OS=Homo sapiens OX=9606 GN=MRPL2 PE=1 SV=2	5	4.66411e-05	4.88994e-05	0.420489	1	0.953817	-0.0682163
MRPL20	Q9BYC9	sp|Q9BYC9|RM20_HUMAN 39S ribosomal protein L20, mitochondrial OS=Homo sapiens OX=9606 GN=MRPL20 PE=1 SV=1	2	3.31659e-08	1.38026e-05	8.11424e-22	4	0.00240288	-8.70102
MRPL21	Q7Z2W9	sp|Q7Z2W9|RM21_HUMAN 39S ribosomal protein L21, mitochondrial OS=Homo sapiens OX=9606 GN=MRPL21 PE=1 SV=2	3	1.59117e-05	4.11493e-05	0.0539374	1	0.386681	-1.37078
MRPL22	Q9NWU5	sp|Q9NWU5|RM22_HUMAN 39S ribosomal protein L22, mitochondrial OS=Homo sapiens OX=9606 GN=MRPL22 PE=1 SV=1	6	2.15802e-05	7.0858e-05	0.0238562	2	0.304555	-1.71522
MRPL23	Q16540	sp|Q16540|RM23_HUMAN 39S ribosomal protein L23, mitochondrial OS=Homo sapiens OX=9606 GN=MRPL23 PE=1 SV=1	4	6.7724e-05	7.01199e-05	0.428132	1	0.965832	-0.0501564
MRPL24	Q96A35	sp|Q96A35|RM24_HUMAN 39S ribosomal protein L24, mitochondrial OS=Homo sapiens OX=9606 GN=MRPL24 PE=1 SV=1	6	3.46079e-05	5.38816e-05	0.206983	1	0.642295	-0.638693
MRPL27	Q9P0M9	sp|Q9P0M9|RM27_HUMAN 39S ribosomal protein L27, mitochondrial OS=Homo sapiens OX=9606 GN=MRPL27 PE=1 SV=1	4	2.6652e-05	5.16673e-05	0.123299	1	0.51584	-0.955006
MRPL28	Q13084	sp|Q13084|RM28_HUMAN 39S ribosomal protein L28, mitochondrial OS=Homo sapiens OX=9606 GN=MRPL28 PE=1 SV=4	5	1.49172e-05	2.8048e-05	0.133279	1	0.531846	-0.910921
MRPL3	P09001	sp|P09001|RM03_HUMAN 39S ribosomal protein L3, mitochondrial OS=Homo sapiens OX=9606 GN=MRPL3 PE=1 SV=1	8	2.78454e-05	3.65362e-05	0.291055	1	0.762133	-0.391885
MRPL30	Q8TCC3	sp|Q8TCC3|RM30_HUMAN 39S ribosomal protein L30, mitochondrial OS=Homo sapiens OX=9606 GN=MRPL30 PE=1 SV=1	2	4.1967e-06	1.17359e-05	0.0418427	2	0.357596	-1.4836
MRPL33	O75394	sp|O75394|RM33_HUMAN 39S ribosomal protein L33, mitochondrial OS=Homo sapiens OX=9606 GN=MRPL33 PE=1 SV=1	1	9.24866e-06	3.96731e-05	0.00827595	3	0.233122	-2.10085
MRPL34	Q9BQ48	sp|Q9BQ48|RM34_HUMAN 39S ribosomal protein L34, mitochondrial OS=Homo sapiens OX=9606 GN=MRPL34 PE=1 SV=1	2	1.39227e-05	3.72743e-05	0.0482776	2	0.373521	-1.42074
MRPL37	Q9BZE1	sp|Q9BZE1|RM37_HUMAN 39S ribosomal protein L37, mitochondrial OS=Homo sapiens OX=9606 GN=MRPL37 PE=1 SV=2	16	6.06632e-06	4.92685e-05	0.000347686	4	0.123128	-3.02177
MRPL38	Q96DV4	sp|Q96DV4|RM38_HUMAN 39S ribosomal protein L38, mitochondrial OS=Homo sapiens OX=9606 GN=MRPL38 PE=1 SV=2	9	2.25747e-05	2.52801e-05	0.380809	1	0.892983	-0.163295
MRPL39	Q9NYK5	sp|Q9NYK5|RM39_HUMAN 39S ribosomal protein L39, mitochondrial OS=Homo sapiens OX=9606 GN=MRPL39 PE=1 SV=3	8	2.74476e-05	2.02979e-05	0.402481	1	1.35224	0.435353
MRPL4	Q9BYD3	sp|Q9BYD3|RM04_HUMAN 39S ribosomal protein L4, mitochondrial OS=Homo sapiens OX=9606 GN=MRPL4 PE=1 SV=1	7	5.66853e-05	6.86437e-05	0.335317	1	0.82579	-0.276153
MRPL40	Q9NQ50	sp|Q9NQ50|RM40_HUMAN 39S ribosomal protein L40, mitochondrial OS=Homo sapiens OX=9606 GN=MRPL40 PE=1 SV=1	4	3.31659e-08	5.09292e-05	3.22565e-31	4	0.000651215	-10.5846
MRPL41	Q8IXM3	sp|Q8IXM3|RM41_HUMAN 39S ribosomal protein L41, mitochondrial OS=Homo sapiens OX=9606 GN=MRPL41 PE=1 SV=1	4	4.07736e-05	5.55424e-05	0.271357	1	0.7341	-0.445951
MRPL42	Q9Y6G3	sp|Q9Y6G3|RM42_HUMAN 39S ribosomal protein L42, mitochondrial OS=Homo sapiens OX=9606 GN=MRPL42 PE=1 SV=1	4	2.23758e-05	3.5429e-05	0.199562	1	0.631567	-0.662993
MRPL43	Q8N983	sp|Q8N983|RM43_HUMAN 39S ribosomal protein L43, mitochondrial OS=Homo sapiens OX=9606 GN=MRPL43 PE=1 SV=1	5	3.31659e-08	3.98576e-05	2.56779e-29	4	0.000832109	-10.2309
MRPL44	Q9H9J2	sp|Q9H9J2|RM44_HUMAN 39S ribosomal protein L44, mitochondrial OS=Homo sapiens OX=9606 GN=MRPL44 PE=1 SV=1	6	3.33151e-05	4.42863e-05	0.28413	1	0.752266	-0.410685
MRPL45	Q9BRJ2	sp|Q9BRJ2|RM45_HUMAN 39S ribosomal protein L45, mitochondrial OS=Homo sapiens OX=9606 GN=MRPL45 PE=1 SV=2	8	3.77902e-05	6.31079e-05	0.177179	1	0.598819	-0.739809
MRPL46	Q9H2W6	sp|Q9H2W6|RM46_HUMAN 39S ribosomal protein L46, mitochondrial OS=Homo sapiens OX=9606 GN=MRPL46 PE=1 SV=1	5	2.21769e-05	4.05957e-05	0.142474	1	0.546286	-0.872272
MRPL47	Q9HD33	sp|Q9HD33|RM47_HUMAN 39S ribosomal protein L47, mitochondrial OS=Homo sapiens OX=9606 GN=MRPL47 PE=1 SV=2	5	3.54035e-05	4.44708e-05	0.314784	1	0.796106	-0.328968
MRPL48	Q96GC5	sp|Q96GC5|RM48_HUMAN 39S ribosomal protein L48, mitochondrial OS=Homo sapiens OX=9606 GN=MRPL48 PE=1 SV=2	2	1.26299e-05	2.97087e-05	0.0721315	1	0.425124	-1.23404
MRPL49	Q13405	sp|Q13405|RM49_HUMAN 39S ribosomal protein L49, mitochondrial OS=Homo sapiens OX=9606 GN=MRPL49 PE=1 SV=1	7	6.484e-05	0.000119757	0.139361	1	0.541428	-0.885158
MRPL50	Q8N5N7	sp|Q8N5N7|RM50_HUMAN 39S ribosomal protein L50, mitochondrial OS=Homo sapiens OX=9606 GN=MRPL50 PE=1 SV=2	5	1.31271e-05	5.96019e-05	0.00647652	3	0.220247	-2.18281
MRPL53	Q96EL3	sp|Q96EL3|RM53_HUMAN 39S ribosomal protein L53, mitochondrial OS=Homo sapiens OX=9606 GN=MRPL53 PE=1 SV=1	2	6.49395e-06	6.15394e-08	1.44452e-07	4	105.525	6.72144
MRPL54	Q6P161	sp|Q6P161|RM54_HUMAN 39S ribosomal protein L54, mitochondrial OS=Homo sapiens OX=9606 GN=MRPL54 PE=1 SV=1	1	3.31659e-08	6.15394e-08	0.137773	1	0.538937	-0.891812
MRPL55	Q7Z7F7	sp|Q7Z7F7|RM55_HUMAN 39S ribosomal protein L55, mitochondrial OS=Homo sapiens OX=9606 GN=MRPL55 PE=1 SV=1	2	3.31659e-08	1.25478e-05	3.35533e-21	4	0.00264317	-8.56352
MRPL57	Q9BQC6	sp|Q9BQC6|RT63_HUMAN Ribosomal protein 63, mitochondrial OS=Homo sapiens OX=9606 GN=MRPL57 PE=1 SV=1	1	4.1967e-05	8.52511e-05	0.109064	1	0.492276	-1.02246
MRPL58	Q14197	sp|Q14197|ICT1_HUMAN Peptidyl-tRNA hydrolase ICT1, mitochondrial OS=Homo sapiens OX=9606 GN=MRPL58 PE=1 SV=1	4	3.31659e-08	3.22921e-05	9.81167e-28	4	0.00102706	-9.92726
MRPL9	Q9BYD2	sp|Q9BYD2|RM09_HUMAN 39S ribosomal protein L9, mitochondrial OS=Homo sapiens OX=9606 GN=MRPL9 PE=1 SV=2	5	7.66743e-06	8.54356e-06	0.383777	1	0.897452	-0.156093
MRPS10	P82664	sp|P82664|RT10_HUMAN 28S ribosomal protein S10, mitochondrial OS=Homo sapiens OX=9606 GN=MRPS10 PE=1 SV=2	3	1.45194e-05	1.21234e-05	0.455869	1	1.19764	0.260191
MRPS11	P82912	sp|P82912|RT11_HUMAN 28S ribosomal protein S11, mitochondrial OS=Homo sapiens OX=9606 GN=MRPS11 PE=1 SV=2	3	1.74034e-05	2.4542e-05	0.253776	1	0.709127	-0.495883
MRPS12	O15235	sp|O15235|RT12_HUMAN 28S ribosomal protein S12, mitochondrial OS=Homo sapiens OX=9606 GN=MRPS12 PE=1 SV=1	1	3.31659e-08	6.15394e-08	0.137773	1	0.538937	-0.891812
MRPS14	O60783	sp|O60783|RT14_HUMAN 28S ribosomal protein S14, mitochondrial OS=Homo sapiens OX=9606 GN=MRPS14 PE=1 SV=1	3	3.31659e-08	2.87861e-05	6.85573e-27	4	0.00115215	-9.76146
MRPS15	P82914	sp|P82914|RT15_HUMAN 28S ribosomal protein S15, mitochondrial OS=Homo sapiens OX=9606 GN=MRPS15 PE=1 SV=1	2	8.67186e-06	6.15394e-08	2.45279e-08	4	140.915	7.13869
MRPS16	Q9Y3D3	sp|Q9Y3D3|RT16_HUMAN 28S ribosomal protein S16, mitochondrial OS=Homo sapiens OX=9606 GN=MRPS16 PE=1 SV=1	2	1.27293e-05	6.15394e-08	1.99148e-09	4	206.848	7.69243
[truncated: 2,053 more rows]

## Sheet: Table S3
Gene	Accession	Description	Unique peptides	MEAN BBR	MEAN Ctrl	sign	level	FOLD CHANGE	LOG_FOLDCHANGE
AAMP	Q13685	sp|Q13685|AAMP_HUMAN Angio-associated migratory cell protein OS=Homo sapiens OX=9606 GN=AAMP PE=1 SV=2	3	1.02431e-05	6.15394e-08	8.43641e-09	4	166.448	7.37893
ABCA13	Q86UQ4	sp|Q86UQ4|ABCAD_HUMAN ATP-binding cassette sub-family A member 13 OS=Homo sapiens OX=9606 GN=ABCA13 PE=2 SV=3	2	1.41216e-06	6.15394e-08	0.000312582	4	22.9472	4.52025
ABCB10	Q9NRK6	sp|Q9NRK6|ABCBA_HUMAN ATP-binding cassette sub-family B member 10, mitochondrial OS=Homo sapiens OX=9606 GN=ABCB10 PE=1 SV=2	3	3.31659e-08	1.46145e-06	8.34531e-10	4	0.0226939	-5.46155
ABCC3	O15438	sp|O15438|MRP3_HUMAN Canalicular multispecific organic anion transporter 2 OS=Homo sapiens OX=9606 GN=ABCC3 PE=1 SV=3	2	3.31659e-08	1.25109e-06	3.6278e-09	4	0.0265097	-5.23734
ABCC4	O15439	sp|O15439|MRP4_HUMAN Multidrug resistance-associated protein 4 OS=Homo sapiens OX=9606 GN=ABCC4 PE=1 SV=3	5	4.69394e-07	1.99288e-06	0.00864556	3	0.235535	-2.08598
ABHD11	Q8NFV4	sp|Q8NFV4|ABHDB_HUMAN Protein ABHD11 OS=Homo sapiens OX=9606 GN=ABHD11 PE=1 SV=1	2	4.60444e-06	6.15394e-08	1.04175e-06	4	74.8209	6.22537
ABHD16A	O95870	sp|O95870|ABHGA_HUMAN Phosphatidylserine lipase ABHD16A OS=Homo sapiens OX=9606 GN=ABHD16A PE=1 SV=3	3	3.31659e-08	6.05246e-06	8.47553e-17	4	0.00547974	-7.51168
ACOT8	O14734	sp|O14734|ACOT8_HUMAN Acyl-coenzyme A thioesterase 8 OS=Homo sapiens OX=9606 GN=ACOT8 PE=1 SV=1	1	5.46964e-06	6.15394e-08	3.94343e-07	4	88.8801	6.47379
ACTBL2	Q562R1	sp|Q562R1|ACTBL_HUMAN Beta-actin-like protein 2 OS=Homo sapiens OX=9606 GN=ACTBL2 PE=1 SV=2	1	0.00422654	6.15394e-08	1.45258e-35	4	68680.1	16.0676
ACTR10	Q9NZ32	sp|Q9NZ32|ARP10_HUMAN Actin-related protein 10 OS=Homo sapiens OX=9606 GN=ACTR10 PE=1 SV=1	3	9.01993e-06	6.15394e-08	1.91184e-08	4	146.571	7.19546
ADAM15	Q13444	sp|Q13444|ADA15_HUMAN Disintegrin and metalloproteinase domain-containing protein 15 OS=Homo sapiens OX=9606 GN=ADAM15 PE=1 SV=4	3	9.94479e-07	6.15394e-08	0.00123321	3	16.16	4.01436
ADAMTS18	Q8TE60	sp|Q8TE60|ATS18_HUMAN A disintegrin and metalloproteinase with thrombospondin motifs 18 OS=Homo sapiens OX=9606 GN=ADAMTS18 PE=1 SV=3	1	2.01879e-05	6.15394e-08	7.67811e-11	4	328.049	8.35777
ADNP	Q9H2P0	sp|Q9H2P0|ADNP_HUMAN Activity-dependent neuroprotector homeobox protein OS=Homo sapiens OX=9606 GN=ADNP PE=1 SV=1	2	3.31659e-08	5.88638e-07	2.01515e-06	4	0.0563434	-4.14961
AFAP1	Q8N556	sp|Q8N556|AFAP1_HUMAN Actin filament-associated protein 1 OS=Homo sapiens OX=9606 GN=AFAP1 PE=1 SV=2	5	5.17129e-06	1.44484e-05	0.0419668	2	0.357915	-1.48231
AFF1	P51825	sp|P51825|AFF1_HUMAN AF4/FMR2 family member 1 OS=Homo sapiens OX=9606 GN=AFF1 PE=1 SV=1	1	3.31659e-08	2.54646e-06	2.73999e-12	4	0.0130243	-6.26265
AGAP3	Q96P47	sp|Q96P47|AGAP3_HUMAN Arf-GAP with GTPase, ANK repeat and PH domain-containing protein 3 OS=Homo sapiens OX=9606 GN=AGAP3 PE=1 SV=2	3	1.2431e-06	5.44352e-06	0.00757746	3	0.228363	-2.1306
AGFG1	P52594	sp|P52594|AGFG1_HUMAN Arf-GAP domain and FG repeat-containing protein 1 OS=Homo sapiens OX=9606 GN=AGFG1 PE=1 SV=2	1	5.56908e-06	6.15394e-08	3.55487e-07	4	90.4961	6.49978
AGTRAP	Q6RW13	sp|Q6RW13|ATRAP_HUMAN Type-1 angiotensin II receptor-associated protein OS=Homo sapiens OX=9606 GN=AGTRAP PE=1 SV=1	3	1.80001e-05	5.97865e-05	0.0228667	2	0.301073	-1.73182
AHNAK2	Q8IVF2	sp|Q8IVF2|AHNK2_HUMAN Protein AHNAK2 OS=Homo sapiens OX=9606 GN=AHNAK2 PE=1 SV=2	2	3.31659e-08	6.27389e-07	1.24358e-06	4	0.0528634	-4.24159
AIDA	Q96BJ3	sp|Q96BJ3|AIDA_HUMAN Axin interactor, dorsalization-associated protein OS=Homo sapiens OX=9606 GN=AIDA PE=1 SV=1	2	7.2597e-06	6.15394e-08	7.38196e-08	4	117.968	6.88225
AKAP1	Q92667	sp|Q92667|AKAP1_HUMAN A-kinase anchor protein 1, mitochondrial OS=Homo sapiens OX=9606 GN=AKAP1 PE=1 SV=1	1	2.96355e-06	6.15394e-08	1.06276e-05	4	48.1569	5.58967
AKAP17A	Q02040	sp|Q02040|AK17A_HUMAN A-kinase anchor protein 17A OS=Homo sapiens OX=9606 GN=AKAP17A PE=1 SV=2	2	3.31659e-08	9.96441e-07	2.81447e-08	4	0.0332843	-4.90901
AKR1A1	P14550	sp|P14550|AK1A1_HUMAN Aldo-keto reductase family 1 member A1 OS=Homo sapiens OX=9606 GN=AKR1A1 PE=1 SV=3	4	6.37461e-06	2.54646e-05	0.0111418	2	0.250332	-1.99808
AKT1	P31749	sp|P31749|AKT1_HUMAN RAC-alpha serine/threonine-protein kinase OS=Homo sapiens OX=9606 GN=AKT1 PE=1 SV=2	2	8.14478e-07	6.15394e-08	0.00252649	3	13.2351	3.72629
ALDH3B1	P43353	sp|P43353|AL3B1_HUMAN Aldehyde dehydrogenase family 3 member B1 OS=Homo sapiens OX=9606 GN=ALDH3B1 PE=1 SV=1;sp|P48448|AL3B2_HUMAN Aldehyde dehydrogenase family 3 member B2 OS=Homo sapiens OX=9606 GN=ALDH3B2 PE=2 SV=3	3	3.31659e-08	5.77567e-06	1.55563e-16	4	0.00574235	-7.44414
ALDOC	P09972	sp|P09972|ALDOC_HUMAN Fructose-bisphosphate aldolase C OS=Homo sapiens OX=9606 GN=ALDOC PE=1 SV=2	2	3.31659e-08	1.109e-06	1.09039e-08	4	0.0299061	-5.06342
ALG9	Q9H6U8	sp|Q9H6U8|ALG9_HUMAN Alpha-1,2-mannosyltransferase ALG9 OS=Homo sapiens OX=9606 GN=ALG9 PE=1 SV=2	6	3.31659e-08	1.64044e-05	5.86221e-23	4	0.00202177	-8.95016
AMY1A	P04745	sp|P04745|AMY1_HUMAN Alpha-amylase 1 OS=Homo sapiens OX=9606 GN=AMY1A PE=1 SV=2;sp|P19961|AMY2B_HUMAN Alpha-amylase 2B OS=Homo sapiens OX=9606 GN=AMY2B PE=1 SV=1;sp|P04746|AMYP_HUMAN Pancreatic alpha-amylase OS=Homo sapiens OX=9606 GN=AMY2A PE=1 SV=2	2	1.44199e-06	5.86793e-06	0.0103244	2	0.245742	-2.02479
ANAPC13	Q9BS18	sp|Q9BS18|APC13_HUMAN Anaphase-promoting complex subunit 13 OS=Homo sapiens OX=9606 GN=ANAPC13 PE=1 SV=1	1	6.28511e-06	6.15394e-08	1.75379e-07	4	102.131	6.67428
ANAPC7	Q9UJX3	sp|Q9UJX3|APC7_HUMAN Anaphase-promoting complex subunit 7 OS=Homo sapiens OX=9606 GN=ANAPC7 PE=1 SV=4	2	3.12266e-06	6.15394e-08	8.16646e-06	4	50.7425	5.66512
ANKHD1	Q8IWZ3	sp|Q8IWZ3|ANKH1_HUMAN Ankyrin repeat and KH domain-containing protein 1 OS=Homo sapiens OX=9606 GN=ANKHD1 PE=1 SV=1	2	5.91715e-07	6.15394e-08	0.00723238	3	9.61522	3.26532
ANKRD17	O75179	sp|O75179|ANR17_HUMAN Ankyrin repeat domain-containing protein 17 OS=Homo sapiens OX=9606 GN=ANKRD17 PE=1 SV=3	3	4.87295e-06	9.87215e-07	0.0447378	2	4.93606	2.30336
ANKRD18B	A2A2Z9	sp|A2A2Z9|AN18B_HUMAN Ankyrin repeat domain-containing protein 18B OS=Homo sapiens OX=9606 GN=ANKRD18B PE=1 SV=1;sp|Q8IVF6|AN18A_HUMAN Ankyrin repeat domain-containing protein 18A OS=Homo sapiens OX=9606 GN=ANKRD18A PE=2 SV=3	2	3.1525e-06	6.15394e-08	7.78181e-06	4	51.2273	5.67884
ANKZF1	Q9H8Y5	sp|Q9H8Y5|ANKZ1_HUMAN Ankyrin repeat and zinc finger domain-containing protein 1 OS=Homo sapiens OX=9606 GN=ANKZF1 PE=1 SV=1	2	3.31659e-08	1.49651e-06	6.63601e-10	4	0.0221622	-5.49576
ANO6	Q4KMQ2	sp|Q4KMQ2|ANO6_HUMAN Anoctamin-6 OS=Homo sapiens OX=9606 GN=ANO6 PE=1 SV=2	3	7.22986e-06	6.15394e-08	7.56937e-08	4	117.483	6.87631
ANTXR1	Q9H6X2	sp|Q9H6X2|ANTR1_HUMAN Anthrax toxin receptor 1 OS=Homo sapiens OX=9606 GN=ANTXR1 PE=1 SV=2	1	3.31659e-08	2.17741e-06	1.48016e-11	4	0.0152318	-6.03677
APIP	Q96GX9	sp|Q96GX9|MTNB_HUMAN Methylthioribulose-1-phosphate dehydratase OS=Homo sapiens OX=9606 GN=APIP PE=1 SV=1	2	3.34145e-06	6.15394e-08	5.77805e-06	4	54.2977	5.76282
APOB	P04114	sp|P04114|APOB_HUMAN Apolipoprotein B-100 OS=Homo sapiens OX=9606 GN=APOB PE=1 SV=2	4	6.42434e-07	6.15394e-08	0.00557944	3	10.4394	3.38396
APOBEC3B	Q9UH17	sp|Q9UH17|ABC3B_HUMAN DNA dC->dU-editing enzyme APOBEC-3B OS=Homo sapiens OX=9606 GN=APOBEC3B PE=1 SV=1	5	3.31659e-08	6.16317e-06	6.68991e-17	4	0.0053813	-7.53783
APOBEC3C	Q9NRW3	sp|Q9NRW3|ABC3C_HUMAN DNA dC->dU-editing enzyme APOBEC-3C OS=Homo sapiens OX=9606 GN=APOBEC3C PE=1 SV=2	3	1.10387e-05	6.15394e-08	5.16614e-09	4	179.376	7.48685
APPL1	Q9UKG1	sp|Q9UKG1|DP13A_HUMAN DCC-interacting protein 13-alpha OS=Homo sapiens OX=9606 GN=APPL1 PE=1 SV=1	9	1.54144e-05	1.66443e-06	0.00812052	3	9.26111	3.21119
AQR	O60306	sp|O60306|AQR_HUMAN RNA helicase aquarius OS=Homo sapiens OX=9606 GN=AQR PE=1 SV=4	9	1.73039e-06	8.45129e-06	0.00467784	3	0.204749	-2.28807
ARAP1	Q96P48	sp|Q96P48|ARAP1_HUMAN Arf-GAP with Rho-GAP domain, ANK repeat and PH domain-containing protein 1 OS=Homo sapiens OX=9606 GN=ARAP1 PE=1 SV=3	2	3.56024e-07	6.15394e-08	0.0303207	2	5.78529	2.53239
ARFGAP3	Q9NP61	sp|Q9NP61|ARFG3_HUMAN ADP-ribosylation factor GTPase-activating protein 3 OS=Homo sapiens OX=9606 GN=ARFGAP3 PE=1 SV=1	3	2.29725e-06	6.15394e-08	3.65697e-05	4	37.3297	5.22225
ARHGAP45	Q92619	sp|Q92619|HMHA1_HUMAN Rho GTPase-activating protein 45 OS=Homo sapiens OX=9606 GN=ARHGAP45 PE=1 SV=2	4	6.06632e-06	7.63938e-07	0.0128383	2	7.94086	2.98929
ARHGEF12	Q9NZN5	sp|Q9NZN5|ARHGC_HUMAN Rho guanine nucleotide exchange factor 12 OS=Homo sapiens OX=9606 GN=ARHGEF12 PE=1 SV=1	4	1.56133e-06	2.74944e-07	0.0317792	2	5.67873	2.50557
ARMC10	Q8N2F6	sp|Q8N2F6|ARM10_HUMAN Armadillo repeat-containing protein 10 OS=Homo sapiens OX=9606 GN=ARMC10 PE=1 SV=1	4	1.00442e-05	6.15394e-08	9.58297e-09	4	163.216	7.35064
ARMCX3	Q9UH62	sp|Q9UH62|ARMX3_HUMAN Armadillo repeat-containing X-linked protein 3 OS=Homo sapiens OX=9606 GN=ARMCX3 PE=1 SV=1	2	2.04863e-06	6.15394e-08	6.21581e-05	4	33.2897	5.057
ASMTL	O95671	sp|O95671|ASML_HUMAN Probable bifunctional dTTP/UTP pyrophosphatase/methyltransferase protein OS=Homo sapiens OX=9606 GN=ASMTL PE=1 SV=3	3	1.02431e-06	6.15394e-08	0.00110461	3	16.6448	4.057
ASPSCR1	Q9BZE9	sp|Q9BZE9|ASPC1_HUMAN Tether containing UBX domain for GLUT4 OS=Homo sapiens OX=9606 GN=ASPSCR1 PE=1 SV=1	2	2.84421e-06	6.15394e-08	1.30418e-05	4	46.2177	5.53037
ATOX1	O00244	sp|O00244|ATOX1_HUMAN Copper transport protein ATOX1 OS=Homo sapiens OX=9606 GN=ATOX1 PE=1 SV=1	3	0.000203868	6.15394e-08	1.19671e-19	4	3312.81	11.6938
ATP2C1	P98194	sp|P98194|AT2C1_HUMAN Calcium-transporting ATPase type 2C member 1 OS=Homo sapiens OX=9606 GN=ATP2C1 PE=1 SV=3	7	3.31659e-08	1.31198e-05	1.73207e-21	4	0.00252792	-8.62783
ATP6AP2	O75787	sp|O75787|RENR_HUMAN Renin receptor OS=Homo sapiens OX=9606 GN=ATP6AP2 PE=1 SV=2	3	2.46631e-06	2.06669e-05	0.000290696	4	0.119336	-3.0669
ATP6V0C	P27449	sp|P27449|VATL_HUMAN V-type proton ATPase 16 kDa proteolipid subunit OS=Homo sapiens OX=9606 GN=ATP6V0C PE=1 SV=1	2	3.31659e-08	4.35482e-05	5.37131e-30	4	0.000761591	-10.3587
ATP6V0D1	P61421	sp|P61421|VA0D1_HUMAN V-type proton ATPase subunit d 1 OS=Homo sapiens OX=9606 GN=ATP6V0D1 PE=1 SV=1	4	4.22654e-06	6.15394e-08	1.66639e-06	4	68.6801	6.10182
ATP6V1F	Q16864	sp|Q16864|VATF_HUMAN V-type proton ATPase subunit F OS=Homo sapiens OX=9606 GN=ATP6V1F PE=1 SV=2	3	9.86523e-06	4.09648e-05	0.00949158	3	0.240822	-2.05396
AURKB	Q96GD4	sp|Q96GD4|AURKB_HUMAN Aurora kinase B OS=Homo sapiens OX=9606 GN=AURKB PE=1 SV=3	3	3.31659e-08	3.43219e-06	9.35026e-14	4	0.0096632	-6.69328
BABAM1	Q9NWV8	sp|Q9NWV8|BABA1_HUMAN BRISC and BRCA1-A complex member 1 OS=Homo sapiens OX=9606 GN=BABAM1 PE=1 SV=1	1	3.29173e-06	6.15394e-08	6.24099e-06	4	53.4897	5.74119
BAD	Q92934	sp|Q92934|BAD_HUMAN Bcl2-associated agonist of cell death OS=Homo sapiens OX=9606 GN=BAD PE=1 SV=3	4	8.25418e-06	3.5429e-05	0.00825428	3	0.232978	-2.10173
BAZ1A	Q9NRL2	sp|Q9NRL2|BAZ1A_HUMAN Bromodomain adjacent to zinc finger domain protein 1A OS=Homo sapiens OX=9606 GN=BAZ1A PE=1 SV=2	4	9.21882e-07	6.15394e-08	0.00162802	3	14.9803	3.905
BCKDK	O14874	sp|O14874|BCKD_HUMAN [3-methyl-2-oxobutanoate dehydrogenase [lipoamide]] kinase, mitochondrial OS=Homo sapiens OX=9606 GN=BCKDK PE=1 SV=2	2	3.31659e-08	3.22921e-06	1.89634e-13	4	0.0102706	-6.60534
BCL2L13	Q9BXK5	sp|Q9BXK5|B2L13_HUMAN Bcl-2-like protein 13 OS=Homo sapiens OX=9606 GN=BCL2L13 PE=1 SV=1	1	4.11714e-06	6.15394e-08	1.92078e-06	4	66.9025	6.06399
BICD2	Q8TD16	sp|Q8TD16|BICD2_HUMAN Protein bicaudal D homolog 2 OS=Homo sapiens OX=9606 GN=BICD2 PE=1 SV=1	3	8.66191e-07	3.10004e-06	0.0172487	2	0.279413	-1.83953
BIN3	Q9NQY0	sp|Q9NQY0|BIN3_HUMAN Bridging integrator 3 OS=Homo sapiens OX=9606 GN=BIN3 PE=1 SV=1	2	8.90059e-06	6.15394e-08	2.08049e-08	4	144.632	7.17625
BIRC2	Q13490	sp|Q13490|BIRC2_HUMAN Baculoviral IAP repeat-containing protein 2 OS=Homo sapiens OX=9606 GN=BIRC2 PE=1 SV=2	3	2.46631e-06	6.15394e-08	2.61141e-05	4	40.0769	5.3247
BNIP1	Q12981	sp|Q12981|SEC20_HUMAN Vesicle transport protein SEC20 OS=Homo sapiens OX=9606 GN=BNIP1 PE=1 SV=3	3	3.31659e-08	4.72387e-06	1.98894e-15	4	0.00702092	-7.15413
BOLA2	Q9H3K6	sp|Q9H3K6|BOLA2_HUMAN BolA-like protein 2 OS=Homo sapiens OX=9606 GN=BOLA2 PE=1 SV=1	4	8.75142e-05	1.50204e-05	0.0297806	2	5.82634	2.54259
BPHL	Q86WA6	sp|Q86WA6|BPHL_HUMAN Valacyclovir hydrolase OS=Homo sapiens OX=9606 GN=BPHL PE=1 SV=1	4	2.14807e-06	6.15394e-08	5.00016e-05	4	34.9057	5.12539
BPTF	Q12830	sp|Q12830|BPTF_HUMAN Nucleosome-remodeling factor subunit BPTF OS=Homo sapiens OX=9606 GN=BPTF PE=1 SV=3	3	2.82432e-06	4.9453e-07	0.0313269	2	5.71112	2.51377
BSCL2	Q96G97	sp|Q96G97|BSCL2_HUMAN Seipin OS=Homo sapiens OX=9606 GN=BSCL2 PE=1 SV=3	1	2.22763e-06	6.15394e-08	4.22359e-05	4	36.1985	5.17786
C11orf54	Q9H0W9	sp|Q9H0W9|CK054_HUMAN Ester hydrolase C11orf54 OS=Homo sapiens OX=9606 GN=C11orf54 PE=1 SV=1	1	1.91934e-06	6.15394e-08	8.3477e-05	4	31.1889	4.96296
C19orf25	Q9UFG5	sp|Q9UFG5|CS025_HUMAN UPF0449 protein C19orf25 OS=Homo sapiens OX=9606 GN=C19orf25 PE=1 SV=2	2	1.3326e-05	6.15394e-08	1.45813e-09	4	216.544	7.75852
C6orf120	Q7Z4R8	sp|Q7Z4R8|CF120_HUMAN UPF0669 protein C6orf120 OS=Homo sapiens OX=9606 GN=C6orf120 PE=1 SV=1	2	0.000129282	6.15394e-08	1.09676e-17	4	2100.8	11.0367
C8orf82	Q6P1X6	sp|Q6P1X6|CH082_HUMAN UPF0598 protein C8orf82 OS=Homo sapiens OX=9606 GN=C8orf82 PE=1 SV=2	1	3.31659e-08	4.77923e-06	1.7204e-15	4	0.00693959	-7.17093
C9orf64	Q5T6V5	sp|Q5T6V5|QSPP_HUMAN Queuosine salvage protein OS=Homo sapiens OX=9606 GN=C9orf64 PE=1 SV=1	3	2.36686e-06	6.15394e-08	3.17657e-05	4	38.4609	5.26532
CA9	Q16790	sp|Q16790|CAH9_HUMAN Carbonic anhydrase 9 OS=Homo sapiens OX=9606 GN=CA9 PE=1 SV=2	1	3.65968e-06	6.15394e-08	3.59877e-06	4	59.4689	5.89406
CALB2	P22676	sp|P22676|CALB2_HUMAN Calretinin OS=Homo sapiens OX=9606 GN=CALB2 PE=2 SV=2	1	2.92377e-06	6.15394e-08	1.137e-05	4	47.5105	5.57017
CARD19	Q96LW7	sp|Q96LW7|CAR19_HUMAN Caspase recruitment domain-containing protein 19 OS=Homo sapiens OX=9606 GN=CARD19 PE=1 SV=1	3	5.53925e-06	6.15394e-08	3.66667e-07	4	90.0113	6.49203
CBL	P22681	sp|P22681|CBL_HUMAN E3 ubiquitin-protein ligase CBL OS=Homo sapiens OX=9606 GN=CBL PE=1 SV=2	3	3.31659e-08	4.02267e-06	1.42242e-14	4	0.00824475	-6.92231
CBX5	P45973	sp|P45973|CBX5_HUMAN Chromobox protein homolog 5 OS=Homo sapiens OX=9606 GN=CBX5 PE=1 SV=1	2	1.29282e-05	6.15394e-08	1.7926e-09	4	210.08	7.7148
CC2D1B	Q5T0F9	sp|Q5T0F9|C2D1B_HUMAN Coiled-coil and C2 domain-containing protein 1B OS=Homo sapiens OX=9606 GN=CC2D1B PE=1 SV=1	3	2.44642e-06	6.15394e-08	2.71446e-05	4	39.7537	5.31302
CCDC134	Q9H6E4	sp|Q9H6E4|CC134_HUMAN Coiled-coil domain-containing protein 134 OS=Homo sapiens OX=9606 GN=CCDC134 PE=1 SV=1	1	3.31659e-08	3.65362e-06	4.48612e-14	4	0.00907755	-6.78348
CCDC22	O60826	sp|O60826|CCD22_HUMAN Coiled-coil domain-containing protein 22 OS=Homo sapiens OX=9606 GN=CCDC22 PE=1 SV=1	3	1.96907e-06	6.15394e-08	7.44011e-05	4	31.9969	4.99986
CCDC50	Q8IVM0	sp|Q8IVM0|CCD50_HUMAN Coiled-coil domain-containing protein 50 OS=Homo sapiens OX=9606 GN=CCDC50 PE=1 SV=1	2	1.8199e-05	6.15394e-08	1.63355e-10	4	295.728	8.20813
CCDC6	Q16204	sp|Q16204|CCDC6_HUMAN Coiled-coil domain-containing protein 6 OS=Homo sapiens OX=9606 GN=CCDC6 PE=1 SV=2	10	2.25747e-05	2.47265e-06	0.00848304	3	9.12975	3.19058
CCDC88A	Q3V6T2	sp|Q3V6T2|GRDN_HUMAN Girdin OS=Homo sapiens OX=9606 GN=CCDC88A PE=1 SV=2	4	3.65968e-07	6.15394e-08	0.0282616	2	5.94689	2.57214
CCDC9	Q9Y3X0	sp|Q9Y3X0|CCDC9_HUMAN Coiled-coil domain-containing protein 9 OS=Homo sapiens OX=9606 GN=CCDC9 PE=1 SV=1	3	5.99671e-06	6.15394e-08	2.31238e-07	4	97.445	6.60652
CCDC93	Q567U6	sp|Q567U6|CCD93_HUMAN Coiled-coil domain-containing protein 93 OS=Homo sapiens OX=9606 GN=CCDC93 PE=1 SV=2	5	2.87404e-06	6.15394e-08	1.23837e-05	4	46.7025	5.54543
CCDC9B	Q6ZUT6	sp|Q6ZUT6|CCD9B_HUMAN Coiled-coil domain-containing protein 9B OS=Homo sapiens OX=9606 GN=CCDC9B PE=1 SV=1	3	9.8354e-06	6.15394e-08	1.09793e-08	4	159.823	7.32033
CCN1	O00622	sp|O00622|CCN1_HUMAN CCN family member 1 OS=Homo sapiens OX=9606 GN=CCN1 PE=1 SV=1	16	0.000426632	8.02688e-05	0.0374497	2	5.31503	2.41008
CCNL1	Q9UK58	sp|Q9UK58|CCNL1_HUMAN Cyclin-L1 OS=Homo sapiens OX=9606 GN=CCNL1 PE=1 SV=1	1	1.10387e-06	6.15394e-08	0.000832137	4	17.9376	4.16492
CCNY	Q8ND76	sp|Q8ND76|CCNY_HUMAN Cyclin-Y OS=Homo sapiens OX=9606 GN=CCNY PE=1 SV=2	1	3.31659e-08	1.91907e-06	5.5303e-11	4	0.0172823	-5.85456
CCT6B	Q92526	sp|Q92526|TCPW_HUMAN T-complex protein 1 subunit zeta-2 OS=Homo sapiens OX=9606 GN=CCT6B PE=1 SV=5	1	3.31659e-08	2.02979e-05	2.07893e-24	4	0.00163396	-9.25741
CD274	Q9NZQ7	sp|Q9NZQ7|PD1L1_HUMAN Programmed cell death 1 ligand 1 OS=Homo sapiens OX=9606 GN=CD274 PE=1 SV=1	3	7.12047e-06	1.97443e-05	0.0430347	2	0.360634	-1.47139
CD276	Q5ZPR3	sp|Q5ZPR3|CD276_HUMAN CD276 antigen OS=Homo sapiens OX=9606 GN=CD276 PE=1 SV=1	1	2.61548e-06	6.15394e-08	1.96765e-05	4	42.5009	5.40942
CD40	P25942	sp|P25942|TNR5_HUMAN Tumor necrosis factor receptor superfamily member 5 OS=Homo sapiens OX=9606 GN=CD40 PE=1 SV=1	2	6.09616e-06	6.15394e-08	2.09963e-07	4	99.061	6.63024
CD58	P19256	sp|P19256|LFA3_HUMAN Lymphocyte function-associated antigen 3 OS=Homo sapiens OX=9606 GN=CD58 PE=1 SV=1	2	3.35139e-05	6.15394e-08	1.58571e-12	4	544.593	9.08903
CD68	P34810	sp|P34810|CD68_HUMAN Macrosialin OS=Homo sapiens OX=9606 GN=CD68 PE=1 SV=2	1	3.31659e-08	1.76961e-05	1.80871e-23	4	0.0018742	-9.05951
CD99L2	Q8TCZ2	sp|Q8TCZ2|C99L2_HUMAN CD99 antigen-like protein 2 OS=Homo sapiens OX=9606 GN=CD99L2 PE=1 SV=1	1	3.31659e-08	5.62805e-06	2.17173e-16	4	0.00589297	-7.40679
CDA	P32320	sp|P32320|CDD_HUMAN Cytidine deaminase OS=Homo sapiens OX=9606 GN=CDA PE=1 SV=2	3	3.21217e-05	6.15394e-08	2.221e-12	4	521.969	9.02782
CDC26	Q8NHZ8	sp|Q8NHZ8|CDC26_HUMAN Anaphase-promoting complex subunit CDC26 OS=Homo sapiens OX=9606 GN=CDC26 PE=1 SV=1	1	1.37238e-05	6.15394e-08	1.19202e-09	4	223.008	7.80095
CDC40	O60508	sp|O60508|PRP17_HUMAN Pre-mRNA-processing factor 17 OS=Homo sapiens OX=9606 GN=CDC40 PE=1 SV=1	2	2.33703e-06	6.15394e-08	3.37291e-05	4	37.9761	5.24702
CDC42BPA	Q5VT25	sp|Q5VT25|MRCKA_HUMAN Serine/threonine-protein kinase MRCK alpha OS=Homo sapiens OX=9606 GN=CDC42BPA PE=1 SV=1	4	3.31659e-08	5.70186e-07	2.55556e-06	4	0.0581668	-4.10366
CDC42BPB	Q9Y5S2	sp|Q9Y5S2|MRCKB_HUMAN Serine/threonine-protein kinase MRCK beta OS=Homo sapiens OX=9606 GN=CDC42BPB PE=1 SV=2	2	3.31659e-08	4.57625e-07	1.23553e-05	4	0.072474	-3.78639
CDC73	Q6P1J9	sp|Q6P1J9|CDC73_HUMAN Parafibromin OS=Homo sapiens OX=9606 GN=CDC73 PE=1 SV=1	3	8.58235e-07	2.73099e-06	0.026739	2	0.314258	-1.66998
CDK5	Q00535	sp|Q00535|CDK5_HUMAN Cyclin-dependent-like kinase 5 OS=Homo sapiens OX=9606 GN=CDK5 PE=1 SV=3	3	3.31659e-08	1.7124e-06	1.75824e-10	4	0.019368	-5.69018
CDKAL1	Q5VV42	sp|Q5VV42|CDKAL_HUMAN Threonylcarbamoyladenosine tRNA methylthiotransferase OS=Homo sapiens OX=9606 GN=CDKAL1 PE=1 SV=1	1	1.38233e-06	6.15394e-08	0.00034124	4	22.4624	4.48944
CDKN2AIP	Q9NXV6	sp|Q9NXV6|CARF_HUMAN CDKN2A-interacting protein OS=Homo sapiens OX=9606 GN=CDKN2AIP PE=1 SV=3	6	8.02545e-06	6.15394e-08	3.9835e-08	4	130.411	7.02693
CDYL	Q9Y232	sp|Q9Y232|CDYL_HUMAN Chromodomain Y-like protein OS=Homo sapiens OX=9606 GN=CDYL PE=1 SV=2	2	3.31659e-08	2.08514e-06	2.33568e-11	4	0.0159058	-5.9743
CEP164	Q9UPV0	sp|Q9UPV0|CE164_HUMAN Centrosomal protein of 164 kDa OS=Homo sapiens OX=9606 GN=CEP164 PE=1 SV=3	1	1.9989e-06	6.15394e-08	6.95073e-05	4	32.4817	5.02155
CEP41	Q9BYV8	sp|Q9BYV8|CEP41_HUMAN Centrosomal protein of 41 kDa OS=Homo sapiens OX=9606 GN=CEP41 PE=1 SV=1	2	2.83427e-06	6.15394e-08	1.32701e-05	4	46.0561	5.52532
CEP97	Q8IW35	sp|Q8IW35|CEP97_HUMAN Centrosomal protein of 97 kDa OS=Homo sapiens OX=9606 GN=CEP97 PE=1 SV=1	2	1.21326e-06	6.15394e-08	0.000576401	4	19.7152	4.30124
CFDP1	Q9UEE9	sp|Q9UEE9|CFDP1_HUMAN Craniofacial development protein 1 OS=Homo sapiens OX=9606 GN=CFDP1 PE=1 SV=1	1	5.85748e-06	6.15394e-08	2.65262e-07	4	95.1826	6.57263
CGGBP1	Q9UFW8	sp|Q9UFW8|CGBP1_HUMAN CGG triplet repeat-binding protein 1 OS=Homo sapiens OX=9606 GN=CGGBP1 PE=1 SV=2	1	3.25195e-06	6.15394e-08	6.6422e-06	4	52.8433	5.72365
CHAF1B	Q13112	sp|Q13112|CAF1B_HUMAN Chromatin assembly factor 1 subunit B OS=Homo sapiens OX=9606 GN=CHAF1B PE=1 SV=1	3	5.29063e-06	6.15394e-08	4.77111e-07	4	85.9713	6.42578
CHAMP1	Q96JM3	sp|Q96JM3|CHAP1_HUMAN Chromosome alignment-maintaining phosphoprotein 1 OS=Homo sapiens OX=9606 GN=CHAMP1 PE=1 SV=2	2	3.85858e-07	6.15394e-08	0.0246322	2	6.27009	2.64849
CHCHD1	Q96BP2	sp|Q96BP2|CHCH1_HUMAN Coiled-coil-helix-coiled-coil-helix domain-containing protein 1 OS=Homo sapiens OX=9606 GN=CHCHD1 PE=1 SV=1	1	1.05415e-05	6.15394e-08	6.99454e-09	4	171.296	7.42035
CHD1	O14646	sp|O14646|CHD1_HUMAN Chromodomain-helicase-DNA-binding protein 1 OS=Homo sapiens OX=9606 GN=CHD1 PE=1 SV=2;sp|O14647|CHD2_HUMAN Chromodomain-helicase-DNA-binding protein 2 OS=Homo sapiens OX=9606 GN=CHD2 PE=1 SV=2	4	3.11272e-06	4.35482e-07	0.0172947	2	7.14776	2.83749
CHORDC1	Q9UHD1	sp|Q9UHD1|CHRD1_HUMAN Cysteine and histidine-rich domain-containing protein 1 OS=Homo sapiens OX=9606 GN=CHORDC1 PE=1 SV=2	6	3.69946e-05	3.45064e-06	0.0051213	3	10.7211	3.42238
CHST14	Q8NCH0	sp|Q8NCH0|CHSTE_HUMAN Carbohydrate sulfotransferase 14 OS=Homo sapiens OX=9606 GN=CHST14 PE=1 SV=2	3	1.10387e-05	2.25122e-06	0.0454433	2	4.90344	2.29379
CHUK	O15111	sp|O15111|IKKA_HUMAN Inhibitor of nuclear factor kappa-B kinase subunit alpha OS=Homo sapiens OX=9606 GN=CHUK PE=1 SV=2	1	9.68623e-07	6.15394e-08	0.00135921	3	15.7399	3.97635
CIAO2B	Q9Y3D0	sp|Q9Y3D0|CIA2B_HUMAN Cytosolic iron-sulfur assembly component 2B OS=Homo sapiens OX=9606 GN=CIAO2B PE=1 SV=1	4	6.75251e-05	7.27033e-06	0.00804924	3	9.28777	3.21533
CIAPIN1	Q6FI81	sp|Q6FI81|CPIN1_HUMAN Anamorsin OS=Homo sapiens OX=9606 GN=CIAPIN1 PE=1 SV=2	1	3.31659e-08	5.09292e-06	7.75197e-16	4	0.00651215	-7.26265
CIRBP	Q14011	sp|Q14011|CIRBP_HUMAN Cold-inducible RNA-binding protein OS=Homo sapiens OX=9606 GN=CIRBP PE=1 SV=1	2	3.23206e-05	8.96797e-05	0.0429422	2	0.3604	-1.47233
CLCC1	Q96S66	sp|Q96S66|CLCC1_HUMAN Chloride channel CLIC-like protein 1 OS=Homo sapiens OX=9606 GN=CLCC1 PE=1 SV=1	6	3.31659e-08	2.52801e-06	2.96715e-12	4	0.0131194	-6.25216
CLCN7	P51798	sp|P51798|CLCN7_HUMAN H(+)/Cl(-) exchange transporter 7 OS=Homo sapiens OX=9606 GN=CLCN7 PE=1 SV=2	3	3.31659e-08	6.12627e-06	7.23603e-17	4	0.00541372	-7.52916
CLIP2	Q9UDT6	sp|Q9UDT6|CLIP2_HUMAN CAP-Gly domain-containing linker protein 2 OS=Homo sapiens OX=9606 GN=CLIP2 PE=1 SV=1	1	7.94589e-07	6.15394e-08	0.00275223	3	12.9119	3.69063
CLN6	Q9NWW5	sp|Q9NWW5|CLN6_HUMAN Ceroid-lipofuscinosis neuronal protein 6 OS=Homo sapiens OX=9606 GN=CLN6 PE=1 SV=1	1	6.98124e-06	6.15394e-08	9.35876e-08	4	113.443	6.82583
CMBL	Q96DG6	sp|Q96DG6|CMBL_HUMAN Carboxymethylenebutenolidase homolog OS=Homo sapiens OX=9606 GN=CMBL PE=1 SV=1	3	6.00665e-06	6.15394e-08	2.29004e-07	4	97.6066	6.60891
CMC1	Q7Z7K0	sp|Q7Z7K0|COXM1_HUMAN COX assembly mitochondrial protein homolog OS=Homo sapiens OX=9606 GN=CMC1 PE=1 SV=1	2	6.76246e-05	6.15394e-08	4.35711e-15	4	1098.88	10.1018
CNBP	P62633	sp|P62633|CNBP_HUMAN Cellular nucleic acid-binding protein OS=Homo sapiens OX=9606 GN=CNBP PE=1 SV=1	5	9.04976e-05	1.29906e-05	0.0185654	2	6.96637	2.80041
CNOT10	Q9H9A5	sp|Q9H9A5|CNO10_HUMAN CCR4-NOT transcription complex subunit 10 OS=Homo sapiens OX=9606 GN=CNOT10 PE=1 SV=1	3	1.82984e-06	6.15394e-08	0.000103274	4	29.7344	4.89406
CNOT11	Q9UKZ1	sp|Q9UKZ1|CNO11_HUMAN CCR4-NOT transcription complex subunit 11 OS=Homo sapiens OX=9606 GN=CNOT11 PE=1 SV=1	1	2.80443e-06	6.15394e-08	1.3983e-05	4	45.5713	5.51005
CNOT2	Q9NZN8	sp|Q9NZN8|CNOT2_HUMAN CCR4-NOT transcription complex subunit 2 OS=Homo sapiens OX=9606 GN=CNOT2 PE=1 SV=1	2	3.31659e-08	5.53578e-06	2.68501e-16	4	0.00599118	-7.38294
COA4	Q9NYJ1	sp|Q9NYJ1|COA4_HUMAN Cytochrome c oxidase assembly factor 4 homolog, mitochondrial OS=Homo sapiens OX=9606 GN=COA4 PE=1 SV=2	2	1.84973e-05	6.15394e-08	1.45248e-10	4	300.576	8.23159
COA7	Q96BR5	sp|Q96BR5|COA7_HUMAN Cytochrome c oxidase assembly factor 7 OS=Homo sapiens OX=9606 GN=COA7 PE=1 SV=2	1	3.31659e-08	2.58337e-06	2.33967e-12	4	0.0128382	-6.28341
COG3	Q96JB2	sp|Q96JB2|COG3_HUMAN Conserved oligomeric Golgi complex subunit 3 OS=Homo sapiens OX=9606 GN=COG3 PE=1 SV=3	1	3.31659e-08	2.23277e-06	1.13384e-11	4	0.0148542	-6.07299
COMMD10	Q9Y6G5	sp|Q9Y6G5|COMDA_HUMAN COMM domain-containing protein 10 OS=Homo sapiens OX=9606 GN=COMMD10 PE=1 SV=1	2	1.80001e-05	6.15394e-08	1.76822e-10	4	292.496	8.19228
COMMD9	Q9P000	sp|Q9P000|COMD9_HUMAN COMM domain-containing protein 9 OS=Homo sapiens OX=9606 GN=COMMD9 PE=1 SV=2	3	3.31659e-08	6.10781e-06	7.52668e-17	4	0.00543007	-7.52481
COPRS	Q9NQ92	sp|Q9NQ92|COPRS_HUMAN Coordinator of PRMT5 and differentiation stimulator OS=Homo sapiens OX=9606 GN=COPRS PE=1 SV=3	1	5.22102e-06	6.15394e-08	5.14511e-07	4	84.8401	6.40668
COPS5	Q92905	sp|Q92905|CSN5_HUMAN COP9 signalosome complex subunit 5 OS=Homo sapiens OX=9606 GN=COPS5 PE=1 SV=4	5	2.43647e-05	2.4542e-06	0.00654401	3	9.92778	3.31147
COQ8A	Q8NI60	sp|Q8NI60|COQ8A_HUMAN Atypical kinase COQ8A, mitochondrial OS=Homo sapiens OX=9606 GN=COQ8A PE=1 SV=1	1	9.51717e-07	6.15394e-08	0.00144988	3	15.4651	3.95095
CORO2A	Q92828	sp|Q92828|COR2A_HUMAN Coronin-2A OS=Homo sapiens OX=9606 GN=CORO2A PE=1 SV=2	2	3.31659e-08	2.04824e-06	2.8155e-11	4	0.0161924	-5.94854
COX5B	P10606	sp|P10606|COX5B_HUMAN Cytochrome c oxidase subunit 5B, mitochondrial OS=Homo sapiens OX=9606 GN=COX5B PE=1 SV=2	5	0.000138233	0.000570186	0.00975963	3	0.242434	-2.04433
COX6A1	P12074	sp|P12074|CX6A1_HUMAN Cytochrome c oxidase subunit 6A1, mitochondrial OS=Homo sapiens OX=9606 GN=COX6A1 PE=1 SV=4	2	3.31659e-08	0.000109424	1.48928e-37	4	0.000303095	-11.6879
COX7A2L	O14548	sp|O14548|COX7R_HUMAN Cytochrome c oxidase subunit 7A-related protein, mitochondrial OS=Homo sapiens OX=9606 GN=COX7A2L PE=1 SV=2	2	2.15802e-05	6.15394e-08	4.69241e-11	4	350.673	8.45398
COX7C	P15954	sp|P15954|COX7C_HUMAN Cytochrome c oxidase subunit 7C, mitochondrial OS=Homo sapiens OX=9606 GN=COX7C PE=1 SV=1	2	0.000177017	6.15394e-08	4.99264e-19	4	2876.48	11.4901
COX8A	P10176	sp|P10176|COX8A_HUMAN Cytochrome c oxidase subunit 8A, mitochondrial OS=Homo sapiens OX=9606 GN=COX8A PE=1 SV=2	1	3.31659e-08	4.76077e-05	1.0912e-30	4	0.000696649	-10.4873
CPNE8	Q86YQ8	sp|Q86YQ8|CPNE8_HUMAN Copine-8 OS=Homo sapiens OX=9606 GN=CPNE8 PE=1 SV=2	2	1.87957e-06	6.15394e-08	9.16741e-05	4	30.5424	4.93274
CPSF4	O95639	sp|O95639|CPSF4_HUMAN Cleavage and polyadenylation specificity factor subunit 4 OS=Homo sapiens OX=9606 GN=CPSF4 PE=1 SV=1	2	3.31659e-08	3.00778e-06	4.27464e-13	4	0.0110267	-6.50285
CRISPLD2	Q9H0B8	sp|Q9H0B8|CRLD2_HUMAN Cysteine-rich secretory protein LCCL domain-containing 2 OS=Homo sapiens OX=9606 GN=CRISPLD2 PE=2 SV=1	1	2.17791e-06	6.15394e-08	4.69097e-05	4	35.3905	5.14529
CRYBG3	Q68DQ2	sp|Q68DQ2|CRBG3_HUMAN Very large A-kinase anchor protein OS=Homo sapiens OX=9606 GN=CRYBG3 PE=1 SV=3	2	3.31659e-08	1.42085e-06	1.09388e-09	4	0.0233423	-5.42091
CRYZ	Q08257	sp|Q08257|QOR_HUMAN Quinone oxidoreductase OS=Homo sapiens OX=9606 GN=CRYZ PE=1 SV=1	3	3.42101e-06	6.15394e-08	5.11693e-06	4	55.5905	5.79677
CTNNA2	P26232	sp|P26232|CTNA2_HUMAN Catenin alpha-2 OS=Homo sapiens OX=9606 GN=CTNNA2 PE=1 SV=5	1	1.89946e-06	5.53578e-06	0.0363998	2	0.343123	-1.5432
CTR9	Q6PD62	sp|Q6PD62|CTR9_HUMAN RNA polymerase-associated protein CTR9 homolog OS=Homo sapiens OX=9606 GN=CTR9 PE=1 SV=1	1	3.31659e-08	1.28615e-06	2.80521e-09	4	0.025787	-5.27721
CUL2	Q13617	sp|Q13617|CUL2_HUMAN Cullin-2 OS=Homo sapiens OX=9606 GN=CUL2 PE=1 SV=2	8	1.28288e-05	1.55186e-06	0.0114188	2	8.26669	3.04731
CWC22	Q9HCG8	sp|Q9HCG8|CWC22_HUMAN Pre-mRNA-splicing factor CWC22 homolog OS=Homo sapiens OX=9606 GN=CWC22 PE=1 SV=3	3	3.31659e-08	6.53222e-07	9.11715e-07	4	0.0507727	-4.2998
CWC27	Q6UX04	sp|Q6UX04|CWC27_HUMAN Spliceosome-associated protein CWC27 homolog OS=Homo sapiens OX=9606 GN=CWC27 PE=1 SV=1	2	2.08841e-06	6.15394e-08	5.69237e-05	4	33.9361	5.08475
DAP3	P51398	sp|P51398|RT29_HUMAN 28S ribosomal protein S29, mitochondrial OS=Homo sapiens OX=9606 GN=DAP3 PE=1 SV=1	12	3.16244e-05	9.20785e-05	0.0365187	2	0.343451	-1.54182
DAXX	Q9UER7	sp|Q9UER7|DAXX_HUMAN Death domain-associated protein 6 OS=Homo sapiens OX=9606 GN=DAXX PE=1 SV=2	2	2.21769e-06	6.15394e-08	4.31258e-05	4	36.0369	5.1714
DBT	P11182	sp|P11182|ODB2_HUMAN Lipoamide acyltransferase component of branched-chain alpha-keto acid dehydrogenase complex, mitochondrial OS=Homo sapiens OX=9606 GN=DBT PE=1 SV=3	6	3.52046e-06	1.05549e-05	0.0330133	2	0.333538	-1.58408
DCAF7	P61962	sp|P61962|DCAF7_HUMAN DDB1- and CUL4-associated factor 7 OS=Homo sapiens OX=9606 GN=DCAF7 PE=1 SV=1	4	2.37681e-06	6.15394e-08	3.11409e-05	4	38.6225	5.27137
DCAF8	Q5TAQ9	sp|Q5TAQ9|DCAF8_HUMAN DDB1- and CUL4-associated factor 8 OS=Homo sapiens OX=9606 GN=DCAF8 PE=1 SV=1	2	1.09393e-06	6.15394e-08	0.000861448	4	17.776	4.15186
DCAKD	Q8WVC6	sp|Q8WVC6|DCAKD_HUMAN Dephospho-CoA kinase domain-containing protein OS=Homo sapiens OX=9606 GN=DCAKD PE=1 SV=1	2	3.42101e-06	6.15394e-08	5.11693e-06	4	55.5905	5.79677
DCTN3	O75935	sp|O75935|DCTN3_HUMAN Dynactin subunit 3 OS=Homo sapiens OX=9606 GN=DCTN3 PE=1 SV=1	5	3.00333e-05	6.15394e-08	3.77056e-12	4	488.033	8.93083
DCUN1D5	Q9BTE7	sp|Q9BTE7|DCNL5_HUMAN DCN1-like protein 5 OS=Homo sapiens OX=9606 GN=DCUN1D5 PE=1 SV=1	3	5.59892e-06	4.28101e-05	0.00048798	4	0.130785	-2.93473
DDX20	Q9UHI6	sp|Q9UHI6|DDX20_HUMAN Probable ATP-dependent RNA helicase DDX20 OS=Homo sapiens OX=9606 GN=DDX20 PE=1 SV=2	5	1.43205e-06	6.15394e-08	0.000295043	4	23.2704	4.54043
DDX49	Q9Y6V7	sp|Q9Y6V7|DDX49_HUMAN Probable ATP-dependent RNA helicase DDX49 OS=Homo sapiens OX=9606 GN=DDX49 PE=1 SV=1	1	2.01879e-06	6.15394e-08	6.64526e-05	4	32.8049	5.03584
DERA	Q9Y315	sp|Q9Y315|DEOC_HUMAN Deoxyribose-phosphate aldolase OS=Homo sapiens OX=9606 GN=DERA PE=1 SV=2	5	3.79891e-06	6.15394e-08	2.95463e-06	4	61.7313	5.94793
DFFA	O00273	sp|O00273|DFFA_HUMAN DNA fragmentation factor subunit alpha OS=Homo sapiens OX=9606 GN=DFFA PE=1 SV=1	4	1.3326e-06	5.18518e-06	0.0123996	2	0.257002	-1.96015
DHCR24	Q15392	sp|Q15392|DHC24_HUMAN Delta(24)-sterol reductase OS=Homo sapiens OX=9606 GN=DHCR24 PE=1 SV=2	4	4.47516e-06	1.52419e-05	0.0208267	2	0.29361	-1.76803
DHFR	P00374	sp|P00374|DYR_HUMAN Dihydrofolate reductase OS=Homo sapiens OX=9606 GN=DHFR PE=1 SV=2;sp|Q86XF0|DYR2_HUMAN Dihydrofolate reductase 2, mitochondrial OS=Homo sapiens OX=9606 GN=DHFR2 PE=1 SV=1	2	5.0619e-06	6.15394e-08	6.13224e-07	4	82.2545	6.36202
DHPS	P49366	sp|P49366|DHYS_HUMAN Deoxyhypusine synthase OS=Homo sapiens OX=9606 GN=DHPS PE=1 SV=1	3	8.8807e-06	6.15394e-08	2.1102e-08	4	144.309	7.17302
DHX37	Q8IY37	sp|Q8IY37|DHX37_HUMAN Probable ATP-dependent RNA helicase DHX37 OS=Homo sapiens OX=9606 GN=DHX37 PE=1 SV=1	2	3.27184e-07	6.15394e-08	0.0374219	2	5.31665	2.41052
DHX38	Q92620	sp|Q92620|PRP16_HUMAN Pre-mRNA-splicing factor ATP-dependent RNA helicase PRP16 OS=Homo sapiens OX=9606 GN=DHX38 PE=1 SV=2	1	7.98567e-07	6.15394e-08	0.00270522	3	12.9765	3.69783
DHX8	Q14562	sp|Q14562|DHX8_HUMAN ATP-dependent RNA helicase DHX8 OS=Homo sapiens OX=9606 GN=DHX8 PE=1 SV=1	3	1.21326e-06	6.15394e-08	0.000576401	4	19.7152	4.30124
DIABLO	Q9NR28	sp|Q9NR28|DBLOH_HUMAN Diablo homolog, mitochondrial OS=Homo sapiens OX=9606 GN=DIABLO PE=1 SV=1	7	8.91053e-05	0.000335837	0.014087	2	0.265323	-1.91418
DKK1	O94907	sp|O94907|DKK1_HUMAN Dickkopf-related protein 1 OS=Homo sapiens OX=9606 GN=DKK1 PE=1 SV=1	2	4.62433e-06	6.15394e-08	1.01717e-06	4	75.1441	6.23159
DNAH1	Q9P2D7	sp|Q9P2D7|DYH1_HUMAN Dynein heavy chain 1, axonemal OS=Homo sapiens OX=9606 GN=DNAH1 PE=1 SV=5	1	3.31659e-08	2.82325e-06	8.73167e-13	4	0.0117474	-6.41151
DNAH3	Q8TD57	sp|Q8TD57|DYH3_HUMAN Dynein heavy chain 3, axonemal OS=Homo sapiens OX=9606 GN=DNAH3 PE=2 SV=1	2	2.9536e-06	6.01555e-07	0.0453015	2	4.90995	2.29571
DNAH9	Q9NYC9	sp|Q9NYC9|DYH9_HUMAN Dynein heavy chain 9, axonemal OS=Homo sapiens OX=9606 GN=DNAH9 PE=1 SV=3;sp|Q9H6R3|ACSS3_HUMAN Acyl-CoA synthetase short-chain family member 3, mitochondrial OS=Homo sapiens OX=9606 GN=ACSS3 PE=1 SV=1	2	3.31659e-08	1.17359e-06	6.5318e-09	4	0.0282603	-5.14508
DNAJB4	Q9UDY4	sp|Q9UDY4|DNJB4_HUMAN DnaJ homolog subfamily B member 4 OS=Homo sapiens OX=9606 GN=DNAJB4 PE=1 SV=1	5	3.31659e-08	1.15698e-05	1.10442e-20	4	0.00286659	-8.44645
DNAJC10	Q8IXB1	sp|Q8IXB1|DJC10_HUMAN DnaJ homolog subfamily C member 10 OS=Homo sapiens OX=9606 GN=DNAJC10 PE=1 SV=2	6	1.93923e-06	6.95663e-06	0.0170937	2	0.27876	-1.8429
DNAJC3	Q13217	sp|Q13217|DNJC3_HUMAN DnaJ homolog subfamily C member 3 OS=Homo sapiens OX=9606 GN=DNAJC3 PE=1 SV=1	6	8.31385e-06	2.32503e-05	0.0418364	2	0.35758	-1.48366
DNM1	Q05193	sp|Q05193|DYN1_HUMAN Dynamin-1 OS=Homo sapiens OX=9606 GN=DNM1 PE=1 SV=2	3	4.50499e-07	1.3821e-06	0.0304585	2	0.325952	-1.61727
DNMBP	Q6XZF7	sp|Q6XZF7|DNMBP_HUMAN Dynamin-binding protein OS=Homo sapiens OX=9606 GN=DNMBP PE=1 SV=1	13	6.34478e-05	2.23277e-06	0.000126077	4	28.4167	4.82867
DNPH1	O43598	sp|O43598|DNPH1_HUMAN 2-deoxynucleoside 5-phosphate N-hydrolase 1 OS=Homo sapiens OX=9606 GN=DNPH1 PE=1 SV=1	1	1.44199e-05	6.15394e-08	8.4728e-10	4	234.32	7.87234
DOHH	Q9BU89	sp|Q9BU89|DOHH_HUMAN Deoxyhypusine hydroxylase OS=Homo sapiens OX=9606 GN=DOHH PE=1 SV=1	2	1.18343e-05	6.15394e-08	3.25337e-09	4	192.304	7.58725
DOLPP1	Q86YN1	sp|Q86YN1|DOPP1_HUMAN Dolichyldiphosphatase 1 OS=Homo sapiens OX=9606 GN=DOLPP1 PE=2 SV=1	3	1.5315e-06	2.98932e-05	9.77477e-07	4	0.0512323	-4.2868
DPAGT1	Q9H3H5	sp|Q9H3H5|GPT_HUMAN UDP-N-acetylglucosamine--dolichyl-phosphate N-acetylglucosaminephosphotransferase OS=Homo sapiens OX=9606 GN=DPAGT1 PE=1 SV=2	2	1.35249e-05	6.15394e-08	1.31758e-09	4	219.776	7.77989
DPY19L1	Q2PZI1	sp|Q2PZI1|D19L1_HUMAN Probable C-mannosyltransferase DPY19L1 OS=Homo sapiens OX=9606 GN=DPY19L1 PE=2 SV=1	5	1.76023e-06	6.79056e-06	0.0128359	2	0.259217	-1.94777
DUSP23	Q9BVJ7	sp|Q9BVJ7|DUS23_HUMAN Dual specificity protein phosphatase 23 OS=Homo sapiens OX=9606 GN=DUSP23 PE=1 SV=1	2	1.2431e-05	6.15394e-08	2.33791e-09	4	202	7.65821
DUSP3	P51452	sp|P51452|DUS3_HUMAN Dual specificity protein phosphatase 3 OS=Homo sapiens OX=9606 GN=DUSP3 PE=1 SV=1	4	1.18343e-05	3.80124e-05	0.0258487	2	0.311328	-1.68349
DYNLT3	P51808	sp|P51808|DYLT3_HUMAN Dynein light chain Tctex-type 3 OS=Homo sapiens OX=9606 GN=DYNLT3 PE=1 SV=1	2	9.21882e-05	6.15394e-08	2.65829e-16	4	1498.03	10.5489
ECHDC1	Q9NTX5	sp|Q9NTX5|ECHD1_HUMAN Ethylmalonyl-CoA decarboxylase OS=Homo sapiens OX=9606 GN=ECHDC1 PE=1 SV=2	3	4.79339e-06	1.69579e-05	0.0180329	2	0.282663	-1.82284
EDEM3	Q9BZQ6	sp|Q9BZQ6|EDEM3_HUMAN ER degradation-enhancing alpha-mannosidase-like protein 3 OS=Homo sapiens OX=9606 GN=EDEM3 PE=1 SV=2	1	3.31659e-08	9.72452e-07	3.47952e-08	4	0.0341054	-4.87386
EEF1A2	Q05639	sp|Q05639|EF1A2_HUMAN Elongation factor 1-alpha 2 OS=Homo sapiens OX=9606 GN=EEF1A2 PE=1 SV=1	1	7.14036e-06	6.15394e-08	8.16471e-08	4	116.029	6.85834
EEF1AKNMT	Q8N6R0	sp|Q8N6R0|EFNMT_HUMAN eEF1A lysine and N-terminal methyltransferase OS=Homo sapiens OX=9606 GN=EEF1AKNMT PE=1 SV=1	2	9.9249e-07	6.15394e-08	0.00124239	3	16.1277	4.01147
EEF1E1	O43324	sp|O43324|MCA3_HUMAN Eukaryotic translation elongation factor 1 epsilon-1 OS=Homo sapiens OX=9606 GN=EEF1E1 PE=1 SV=1	4	6.65307e-05	5.59114e-06	0.00363308	3	11.8993	3.5728
EGLN1	Q9GZT9	sp|Q9GZT9|EGLN1_HUMAN Egl nine homolog 1 OS=Homo sapiens OX=9606 GN=EGLN1 PE=1 SV=1	3	4.30609e-06	6.15394e-08	1.5055e-06	4	69.9729	6.12872
EIF2AK4	Q9P2K8	sp|Q9P2K8|E2AK4_HUMAN eIF-2-alpha kinase GCN2 OS=Homo sapiens OX=9606 GN=EIF2AK4 PE=1 SV=3	2	4.51494e-07	6.15394e-08	0.0160819	2	7.33665	2.87512
EIF2D	P41214	sp|P41214|EIF2D_HUMAN Eukaryotic translation initiation factor 2D OS=Homo sapiens OX=9606 GN=EIF2D PE=1 SV=3	4	1.88951e-06	6.15394e-08	8.95402e-05	4	30.704	4.94036
EIF4EBP1	Q13541	sp|Q13541|4EBP1_HUMAN Eukaryotic translation initiation factor 4E-binding protein 1 OS=Homo sapiens OX=9606 GN=EIF4EBP1 PE=1 SV=3	1	9.39783e-06	6.15394e-08	1.47138e-08	4	152.712	7.25467
EML2	O95834	sp|O95834|EMAL2_HUMAN Echinoderm microtubule-associated protein-like 2 OS=Homo sapiens OX=9606 GN=EML2 PE=1 SV=1	2	2.5757e-06	6.15394e-08	2.11935e-05	4	41.8545	5.38731
ENAH	Q8N8S7	sp|Q8N8S7|ENAH_HUMAN Protein enabled homolog OS=Homo sapiens OX=9606 GN=ENAH PE=1 SV=2	6	1.03426e-05	6.15394e-08	7.92161e-09	4	168.064	7.39287
ENOPH1	Q9UHY7	sp|Q9UHY7|ENOPH_HUMAN Enolase-phosphatase E1 OS=Homo sapiens OX=9606 GN=ENOPH1 PE=1 SV=1	5	3.88841e-05	5.94174e-06	0.0219911	2	6.54423	2.71022
ENSA	O43768	sp|O43768|ENSA_HUMAN Alpha-endosulfine OS=Homo sapiens OX=9606 GN=ENSA PE=1 SV=1	1	3.31659e-08	6.64294e-06	2.494e-17	4	0.00499265	-7.64598
EOGT	Q5NDL2	sp|Q5NDL2|EOGT_HUMAN EGF domain-specific O-linked N-acetylglucosamine transferase OS=Homo sapiens OX=9606 GN=EOGT PE=1 SV=1	1	3.31659e-08	1.48174e-06	7.30466e-10	4	0.022383	-5.48145
EPS8	Q12929	sp|Q12929|EPS8_HUMAN Epidermal growth factor receptor kinase substrate 8 OS=Homo sapiens OX=9606 GN=EPS8 PE=1 SV=1	2	3.31659e-08	4.85304e-06	1.42085e-15	4	0.00683405	-7.19304
ERMP1	Q7Z2K6	sp|Q7Z2K6|ERMP1_HUMAN Endoplasmic reticulum metallopeptidase 1 OS=Homo sapiens OX=9606 GN=ERMP1 PE=1 SV=2	2	1.40222e-06	6.15394e-08	0.00032181	4	22.7856	4.51005
ERP29	P30040	sp|P30040|ERP29_HUMAN Endoplasmic reticulum resident protein 29 OS=Homo sapiens OX=9606 GN=ERP29 PE=1 SV=4	11	0.000188951	0.000542507	0.0382988	2	0.348293	-1.52163
ESF1	Q9H501	sp|Q9H501|ESF1_HUMAN ESF1 homolog OS=Homo sapiens OX=9606 GN=ESF1 PE=1 SV=1	5	2.49614e-06	6.15394e-08	2.46519e-05	4	40.5617	5.34204
ETHE1	O95571	sp|O95571|ETHE1_HUMAN Persulfide dioxygenase ETHE1, mitochondrial OS=Homo sapiens OX=9606 GN=ETHE1 PE=1 SV=2	3	4.54477e-06	2.8417e-05	0.00142345	3	0.159931	-2.64448
EXOC5	O00471	sp|O00471|EXOC5_HUMAN Exocyst complex component 5 OS=Homo sapiens OX=9606 GN=EXOC5 PE=1 SV=1	4	2.01879e-06	6.15394e-08	6.64526e-05	4	32.8049	5.03584
EXOSC5	Q9NQT4	sp|Q9NQT4|EXOS5_HUMAN Exosome complex component RRP46 OS=Homo sapiens OX=9606 GN=EXOSC5 PE=1 SV=1	5	1.72045e-05	2.89706e-06	0.0283629	2	5.9386	2.57012
F10	P00742	sp|P00742|FA10_HUMAN Coagulation factor X OS=Homo sapiens OX=9606 GN=F10 PE=1 SV=2	2	3.31659e-08	8.56201e-07	1.03025e-07	4	0.0387361	-4.69018
FADS2	O95864	sp|O95864|FADS2_HUMAN Acyl-CoA 6-desaturase OS=Homo sapiens OX=9606 GN=FADS2 PE=1 SV=1	4	1.87957e-06	8.1007e-06	0.00811149	3	0.232025	-2.10765
FAHD2A	Q96GK7	sp|Q96GK7|FAH2A_HUMAN Fumarylacetoacetate hydrolase domain-containing protein 2A OS=Homo sapiens OX=9606 GN=FAHD2A PE=1 SV=1;sp|Q6P2I3|FAH2B_HUMAN Fumarylacetoacetate hydrolase domain-containing protein 2B OS=Homo sapiens OX=9606 GN=FAHD2B PE=1 SV=1	2	9.46744e-06	6.15394e-08	1.4034e-08	4	153.843	7.26532
FAM120B	Q96EK7	sp|Q96EK7|F120B_HUMAN Constitutive coactivator of peroxisome proliferator-activated receptor gamma OS=Homo sapiens OX=9606 GN=FAM120B PE=1 SV=1	4	1.9094e-06	6.15394e-08	8.54434e-05	4	31.0272	4.95546
FASTKD2	Q9NYY8	sp|Q9NYY8|FAKD2_HUMAN FAST kinase domain-containing protein 2, mitochondrial OS=Homo sapiens OX=9606 GN=FASTKD2 PE=1 SV=1	4	8.14478e-07	6.15394e-08	0.00252649	3	13.2351	3.72629
FBLL1	A6NHQ2	sp|A6NHQ2|FBLL1_HUMAN rRNA/tRNA 2-O-methyltransferase fibrillarin-like protein 1 OS=Homo sapiens OX=9606 GN=FBLL1 PE=3 SV=2	1	5.44975e-05	6.15394e-08	2.84893e-14	4	885.569	9.79046
FBXO7	Q9Y3I1	sp|Q9Y3I1|FBX7_HUMAN F-box only protein 7 OS=Homo sapiens OX=9606 GN=FBXO7 PE=1 SV=1	1	2.21769e-06	6.15394e-08	4.31258e-05	4	36.0369	5.1714
FDXR	P22570	sp|P22570|ADRO_HUMAN NADPH:adrenodoxin oxidoreductase, mitochondrial OS=Homo sapiens OX=9606 GN=FDXR PE=1 SV=3	5	3.31659e-08	7.82391e-07	2.17132e-07	4	0.0423904	-4.56012
FECH	P22830	sp|P22830|HEMH_HUMAN Ferrochelatase, mitochondrial OS=Homo sapiens OX=9606 GN=FECH PE=1 SV=2	3	3.31659e-08	2.62027e-06	2.00135e-12	4	0.0126574	-6.30387
FIBP	O43427	sp|O43427|FIBP_HUMAN Acidic fibroblast growth factor intracellular-binding protein OS=Homo sapiens OX=9606 GN=FIBP PE=1 SV=3	3	3.31659e-08	1.36549e-06	1.59725e-09	4	0.0242886	-5.36358
FKBP15	Q5T1M5	sp|Q5T1M5|FKB15_HUMAN FK506-binding protein 15 OS=Homo sapiens OX=9606 GN=FKBP15 PE=1 SV=2	1	6.99119e-07	6.15394e-08	0.00423849	3	11.3605	3.50595
FKRP	Q9H9S5	sp|Q9H9S5|FKRP_HUMAN Fukutin-related protein OS=Homo sapiens OX=9606 GN=FKRP PE=1 SV=1	1	3.31659e-08	1.04811e-06	1.80445e-08	4	0.0316436	-4.98194
FMNL1	O95466	sp|O95466|FMNL1_HUMAN Formin-like protein 1 OS=Homo sapiens OX=9606 GN=FMNL1 PE=1 SV=3	6	5.16135e-06	6.15394e-08	5.4924e-07	4	83.8705	6.39009
FMR1	Q06787	sp|Q06787|FMR1_HUMAN Synaptic functional regulator FMR1 OS=Homo sapiens OX=9606 GN=FMR1 PE=1 SV=1	2	3.20222e-06	6.15394e-08	7.18608e-06	4	52.0353	5.70142
FOSL2	P15408	sp|P15408|FOSL2_HUMAN Fos-related antigen 2 OS=Homo sapiens OX=9606 GN=FOSL2 PE=1 SV=1	1	3.31659e-08	7.21497e-06	8.27793e-18	4	0.00459681	-7.76515
FOXRED1	Q96CU9	sp|Q96CU9|FXRD1_HUMAN FAD-dependent oxidoreductase domain-containing protein 1 OS=Homo sapiens OX=9606 GN=FOXRED1 PE=1 SV=2	4	5.77792e-06	1.93752e-05	0.0220716	2	0.298212	-1.74559
FSCN1	Q16658	sp|Q16658|FSCN1_HUMAN Fascin OS=Homo sapiens OX=9606 GN=FSCN1 PE=1 SV=3	4	7.55804e-06	6.15394e-08	5.77052e-08	4	122.816	6.94036
FTL	P02792	sp|P02792|FRIL_HUMAN Ferritin light chain OS=Homo sapiens OX=9606 GN=FTL PE=1 SV=2	4	5.73814e-06	6.15394e-08	2.99002e-07	4	93.2433	6.54293
FUCA2	Q9BTY2	sp|Q9BTY2|FUCO2_HUMAN Plasma alpha-L-fucosidase OS=Homo sapiens OX=9606 GN=FUCA2 PE=1 SV=2	1	2.42653e-06	6.15394e-08	2.82224e-05	4	39.4305	5.30124
FZD2	Q14332	sp|Q14332|FZD2_HUMAN Frizzled-2 OS=Homo sapiens OX=9606 GN=FZD2 PE=1 SV=1;sp|O75084|FZD7_HUMAN Frizzled-7 OS=Homo sapiens OX=9606 GN=FZD7 PE=1 SV=2	2	3.31659e-08	2.8048e-06	9.39697e-13	4	0.0118247	-6.40205
G6PC3	Q9BUM1	sp|Q9BUM1|G6PC3_HUMAN Glucose-6-phosphatase 3 OS=Homo sapiens OX=9606 GN=G6PC3 PE=1 SV=2	3	1.60111e-05	6.15394e-08	4.0748e-10	4	260.176	8.02335
GABARAPL2	P60520	sp|P60520|GBRL2_HUMAN Gamma-aminobutyric acid receptor-associated protein-like 2 OS=Homo sapiens OX=9606 GN=GABARAPL2 PE=1 SV=1;sp|Q9H0R8|GBRL1_HUMAN Gamma-aminobutyric acid receptor-associated protein-like 1 OS=Homo sapiens OX=9606 GN=GABARAPL1 PE=1 SV=1;	2	3.31659e-08	2.47265e-05	8.54252e-26	4	0.00134131	-9.54214
GABPA	Q06546	sp|Q06546|GABPA_HUMAN GA-binding protein alpha chain OS=Homo sapiens OX=9606 GN=GABPA PE=1 SV=1	2	5.83759e-06	6.15394e-08	2.70572e-07	4	94.8594	6.56772
GADD45GIP1	Q8TAE8	sp|Q8TAE8|G45IP_HUMAN Growth arrest and DNA damage-inducible proteins-interacting protein 1 OS=Homo sapiens OX=9606 GN=GADD45GIP1 PE=1 SV=1	5	1.89946e-05	6.67984e-05	0.0184496	2	0.284356	-1.81423
GALNT10	Q86SR1	sp|Q86SR1|GLT10_HUMAN Polypeptide N-acetylgalactosaminyltransferase 10 OS=Homo sapiens OX=9606 GN=GALNT10 PE=1 SV=2	2	1.97901e-06	6.15394e-08	7.27266e-05	4	32.1585	5.00713
GAMT	Q14353	sp|Q14353|GAMT_HUMAN Guanidinoacetate N-methyltransferase OS=Homo sapiens OX=9606 GN=GAMT PE=1 SV=1	2	1.2431e-05	6.15394e-08	2.33791e-09	4	202	7.65821
GBP1	P32455	sp|P32455|GBP1_HUMAN Guanylate-binding protein 1 OS=Homo sapiens OX=9606 GN=GBP1 PE=1 SV=2	10	3.41106e-05	6.99354e-06	0.0460153	2	4.87745	2.28613
GCA	P28676	sp|P28676|GRAN_HUMAN Grancalcin OS=Homo sapiens OX=9606 GN=GCA PE=1 SV=2	4	3.31659e-08	1.27138e-05	2.76218e-21	4	0.00260864	-8.58249
GCLC	P48506	sp|P48506|GSH1_HUMAN Glutamate--cysteine ligase catalytic subunit OS=Homo sapiens OX=9606 GN=GCLC PE=1 SV=2	5	2.84421e-06	6.15394e-08	1.30418e-05	4	46.2177	5.53037
GCLM	P48507	sp|P48507|GSH0_HUMAN Glutamate--cysteine ligase regulatory subunit OS=Homo sapiens OX=9606 GN=GCLM PE=1 SV=1	5	1.72045e-05	6.15394e-08	2.44556e-10	4	279.568	8.12706
GIGYF2	Q6Y7W6	sp|Q6Y7W6|GGYF2_HUMAN GRB10-interacting GYF protein 2 OS=Homo sapiens OX=9606 GN=GIGYF2 PE=1 SV=1	4	3.94808e-06	5.92329e-07	0.0209347	2	6.66536	2.73668
GLCE	O94923	sp|O94923|GLCE_HUMAN D-glucuronyl C5-epimerase OS=Homo sapiens OX=9606 GN=GLCE PE=1 SV=3	1	1.45194e-06	6.15394e-08	0.000278646	4	23.5936	4.56033
GLE1	Q53GS7	sp|Q53GS7|GLE1_HUMAN Nucleoporin GLE1 OS=Homo sapiens OX=9606 GN=GLE1 PE=1 SV=2	1	1.2431e-06	6.15394e-08	0.000523588	4	20.2	4.33629
GLIPR1	P48060	sp|P48060|GLIP1_HUMAN Glioma pathogenesis-related protein 1 OS=Homo sapiens OX=9606 GN=GLIPR1 PE=1 SV=3	1	4.03759e-06	6.15394e-08	2.1338e-06	4	65.6097	6.03584
GLRX5	Q86SX6	sp|Q86SX6|GLRX5_HUMAN Glutaredoxin-related protein 5, mitochondrial OS=Homo sapiens OX=9606 GN=GLRX5 PE=1 SV=2	2	3.31659e-08	4.11493e-05	1.46482e-29	4	0.000805989	-10.277
GMDS	O60547	sp|O60547|GMDS_HUMAN GDP-mannose 4,6 dehydratase OS=Homo sapiens OX=9606 GN=GMDS PE=1 SV=1	2	5.58897e-06	6.15394e-08	3.48249e-07	4	90.8193	6.50493
GMPPA	Q96IJ6	sp|Q96IJ6|GMPPA_HUMAN Mannose-1-phosphate guanyltransferase alpha OS=Homo sapiens OX=9606 GN=GMPPA PE=1 SV=1	3	7.88622e-06	1.57216e-06	0.0430615	2	5.01616	2.32658
GNAI1	P63096	sp|P63096|GNAI1_HUMAN Guanine nucleotide-binding protein G(i) subunit alpha-1 OS=Homo sapiens OX=9606 GN=GNAI1 PE=1 SV=2	3	1.25304e-05	6.15394e-08	2.21544e-09	4	203.616	7.66971
GNG5	P63218	sp|P63218|GBG5_HUMAN Guanine nucleotide-binding protein G(I)/G(S)/G(O) subunit gamma-5 OS=Homo sapiens OX=9606 GN=GNG5 PE=1 SV=3	3	0.00018199	6.15394e-08	3.78001e-19	4	2957.28	11.5301
GNL1	P36915	sp|P36915|GNL1_HUMAN Guanine nucleotide-binding protein-like 1 OS=Homo sapiens OX=9606 GN=GNL1 PE=1 SV=2	2	5.44975e-07	6.15394e-08	0.00930426	3	8.85569	3.14661
GNL3L	Q9NVN8	sp|Q9NVN8|GNL3L_HUMAN Guanine nucleotide-binding protein-like 3-like protein OS=Homo sapiens OX=9606 GN=GNL3L PE=1 SV=1	3	3.51051e-06	6.15394e-08	4.47462e-06	4	57.0449	5.83403
GOLGA5	Q8TBA6	sp|Q8TBA6|GOGA5_HUMAN Golgin subfamily A member 5 OS=Homo sapiens OX=9606 GN=GOLGA5 PE=1 SV=3	3	2.49614e-06	6.15394e-08	2.46519e-05	4	40.5617	5.34204
GORASP2	Q9H8Y8	sp|Q9H8Y8|GORS2_HUMAN Golgi reassembly-stacking protein 2 OS=Homo sapiens OX=9606 GN=GORASP2 PE=1 SV=3	4	3.86852e-05	6.15394e-08	4.99137e-13	4	628.625	9.29606
GPATCH8	Q9UKJ3	sp|Q9UKJ3|GPTC8_HUMAN G patch domain-containing protein 8 OS=Homo sapiens OX=9606 GN=GPATCH8 PE=1 SV=2	2	8.43318e-07	6.15394e-08	0.0022371	3	13.7037	3.77649
GPD1L	Q8N335	sp|Q8N335|GPD1L_HUMAN Glycerol-3-phosphate dehydrogenase 1-like protein OS=Homo sapiens OX=9606 GN=GPD1L PE=1 SV=1	1	2.74476e-06	6.15394e-08	1.55457e-05	4	44.6017	5.47903
GPHN	Q9NQX3	sp|Q9NQX3|GEPH_HUMAN Gephyrin OS=Homo sapiens OX=9606 GN=GPHN PE=1 SV=1	1	8.3934e-07	6.15394e-08	0.00227457	3	13.6391	3.76967
GPKOW	Q92917	sp|Q92917|GPKOW_HUMAN G-patch domain and KOW motifs-containing protein OS=Homo sapiens OX=9606 GN=GPKOW PE=1 SV=2	6	1.16354e-05	6.15394e-08	3.64321e-09	4	189.072	7.56279
GPN1	Q9HCN4	sp|Q9HCN4|GPN1_HUMAN GPN-loop GTPase 1 OS=Homo sapiens OX=9606 GN=GPN1 PE=1 SV=1	2	5.30057e-06	6.15394e-08	4.72025e-07	4	86.1329	6.42849
GPR107	Q5VW38	sp|Q5VW38|GP107_HUMAN Protein GPR107 OS=Homo sapiens OX=9606 GN=GPR107 PE=1 SV=1	2	2.40664e-06	6.15394e-08	2.93501e-05	4	39.1073	5.28936
GRIPAP1	Q4V328	sp|Q4V328|GRAP1_HUMAN GRIP1-associated protein 1 OS=Homo sapiens OX=9606 GN=GRIPAP1 PE=1 SV=2	2	5.74809e-07	3.8935e-06	0.000940164	4	0.147633	-2.75991
GRN	P28799	sp|P28799|GRN_HUMAN Progranulin OS=Homo sapiens OX=9606 GN=GRN PE=1 SV=2	4	7.22986e-06	6.15394e-08	7.56937e-08	4	117.483	6.87631
GSK3B	P49841	sp|P49841|GSK3B_HUMAN Glycogen synthase kinase-3 beta OS=Homo sapiens OX=9606 GN=GSK3B PE=1 SV=2	2	5.80776e-06	6.15394e-08	2.78765e-07	4	94.3746	6.56033
GSTZ1	O43708	sp|O43708|MAAI_HUMAN Maleylacetoacetate isomerase OS=Homo sapiens OX=9606 GN=GSTZ1 PE=1 SV=3	1	3.31659e-08	1.39317e-05	7.05487e-22	4	0.0023806	-8.71446
GTF2A1	P52655	sp|P52655|TF2AA_HUMAN Transcription initiation factor IIA subunit 1 OS=Homo sapiens OX=9606 GN=GTF2A1 PE=1 SV=1	1	3.31659e-08	1.78806e-05	1.53818e-23	4	0.00185485	-9.07448
GTF2H2C	Q6P1K8	sp|Q6P1K8|T2H2L_HUMAN General transcription factor IIH subunit 2-like protein OS=Homo sapiens OX=9606 GN=GTF2H2C PE=1 SV=1;sp|Q13888|TF2H2_HUMAN General transcription factor IIH subunit 2 OS=Homo sapiens OX=9606 GN=GTF2H2 PE=1 SV=1	5	1.79006e-06	5.90483e-06	0.0234546	2	0.303152	-1.72189
GTF2H4	Q92759	sp|Q92759|TF2H4_HUMAN General transcription factor IIH subunit 4 OS=Homo sapiens OX=9606 GN=GTF2H4 PE=1 SV=1	2	4.95251e-06	6.15394e-08	6.93622e-07	4	80.4769	6.3305
GTF3C1	Q12789	sp|Q12789|TF3C1_HUMAN General transcription factor 3C polypeptide 1 OS=Homo sapiens OX=9606 GN=GTF3C1 PE=1 SV=4	2	3.31659e-08	1.62937e-07	0.00455468	3	0.203551	-2.29654
GTF3C4	Q9UKN8	sp|Q9UKN8|TF3C4_HUMAN General transcription factor 3C polypeptide 4 OS=Homo sapiens OX=9606 GN=GTF3C4 PE=1 SV=2	1	2.91382e-06	6.15394e-08	1.15649e-05	4	47.3489	5.56526
GTPBP1	O00178	sp|O00178|GTPB1_HUMAN GTP-binding protein 1 OS=Homo sapiens OX=9606 GN=GTPBP1 PE=1 SV=3	4	3.31659e-08	2.71253e-06	1.36446e-12	4	0.0122269	-6.3538
GTPBP6	O43824	sp|O43824|GTPB6_HUMAN Putative GTP-binding protein 6 OS=Homo sapiens OX=9606 GN=GTPBP6 PE=2 SV=4	3	3.31659e-08	2.60182e-06	2.16343e-12	4	0.0127472	-6.29368
GXYLT1	Q4G148	sp|Q4G148|GXLT1_HUMAN Glucoside xylosyltransferase 1 OS=Homo sapiens OX=9606 GN=GXYLT1 PE=1 SV=2	3	4.14698e-06	6.15394e-08	1.84725e-06	4	67.3873	6.0744
HACD2	Q6Y1H2	sp|Q6Y1H2|HACD2_HUMAN Very-long-chain (3R)-3-hydroxyacyl-CoA dehydratase 2 OS=Homo sapiens OX=9606 GN=HACD2 PE=1 SV=1	2	1.65084e-05	6.15394e-08	3.2818e-10	4	268.256	8.06747
HAGH	Q16775	sp|Q16775|GLO2_HUMAN Hydroxyacylglutathione hydrolase, mitochondrial OS=Homo sapiens OX=9606 GN=HAGH PE=1 SV=2	1	6.3945e-06	6.15394e-08	1.58333e-07	4	103.909	6.69918
HAUS5	O94927	sp|O94927|HAUS5_HUMAN HAUS augmin-like complex subunit 5 OS=Homo sapiens OX=9606 GN=HAUS5 PE=1 SV=2	1	3.31659e-08	8.02688e-07	1.76027e-07	4	0.0413185	-4.59707
HEATR3	Q7Z4Q2	sp|Q7Z4Q2|HEAT3_HUMAN HEAT repeat-containing protein 3 OS=Homo sapiens OX=9606 GN=HEATR3 PE=1 SV=2	1	1.06409e-06	6.15394e-08	0.00095699	4	17.2912	4.11197
HEG1	Q9ULI3	sp|Q9ULI3|HEG1_HUMAN Protein HEG homolog 1 OS=Homo sapiens OX=9606 GN=HEG1 PE=1 SV=3	2	3.31659e-08	1.01305e-06	2.43535e-08	4	0.0327387	-4.93286
HFE	Q30201	sp|Q30201|HFE_HUMAN Hereditary hemochromatosis protein OS=Homo sapiens OX=9606 GN=HFE PE=1 SV=1	2	3.31659e-08	3.5429e-06	6.44706e-14	4	0.00936122	-6.73909
HIGD1A	Q9Y241	sp|Q9Y241|HIG1A_HUMAN HIG1 domain family member 1A, mitochondrial OS=Homo sapiens OX=9606 GN=HIGD1A PE=1 SV=1	2	3.29173e-05	9.42928e-05	0.0385985	2	0.349096	-1.5183
HIGD2A	Q9BW72	sp|Q9BW72|HIG2A_HUMAN HIG1 domain family member 2A, mitochondrial OS=Homo sapiens OX=9606 GN=HIGD2A PE=1 SV=1	1	3.31659e-08	1.54817e-05	1.42578e-22	4	0.00214226	-8.86665
HLA-DRB1	P20039	sp|P20039|2B1B_HUMAN HLA class II histocompatibility antigen, DRB1-11 beta chain OS=Homo sapiens OX=9606 GN=HLA-DRB1 PE=1 SV=1;sp|P04440|DPB1_HUMAN HLA class II histocompatibility antigen, DP beta 1 chain OS=Homo sapiens OX=9606 GN=HLA-DPB1 PE=1 SV=1;sp|Q9	2	3.31659e-08	8.08224e-06	1.77066e-18	4	0.00410355	-7.92891
HMBS	P08397	sp|P08397|HEM3_HUMAN Porphobilinogen deaminase OS=Homo sapiens OX=9606 GN=HMBS PE=1 SV=2	2	8.27407e-06	6.15394e-08	3.29382e-08	4	134.451	7.07094
[truncated: 501 more rows]

## Sheet: Table S4
ID	Description	GeneRatio	BgRatio	FoldEnrichment	pvalue	p.adjust	qvalue	genes	Count
[truncated: 200 more rows]
